# Supplementary material for: Diversity, distribution and nitrogen use strategies of bacteria in the South China Sea basin
Source: Copernicus journal article supplement (doi:10.5194/bg-2018-529), 2019-02-12
Supplement: Supplementary file 1 [file Supporting Informationdocx.pdf › Supporting Information/Supporting Informationdocx.pdf]

## SUPPORTING INFORMATION

### Diversity, distribution and nitrogen use strategies of bacteria in the South China Sea basin

Yuan-Yuan Li<sup>1</sup>, Xiao-Huang Chen<sup>1</sup>, Peng-Fei Wu<sup>1</sup>, Dong-Xu Li<sup>1</sup>, Lin Lin<sup>1</sup>, Da-Zhi Wang<sup>1, 2\*</sup>

<sup>1</sup>State Key Laboratory of Marine Environmental Science/College of the Environment and Ecology, Xiamen University, Xiamen, 361005, China

<sup>2</sup>Key Laboratory of Marine Ecology & Environmental Sciences, China Academy of Sciences, Qingdao, 266071, China

#### \* Corresponding Authors

Tel: 86-592-2186016. Email: [dzwang@xmu.edu.cn](mailto:dzwang@xmu.edu.cn).

#### Table of contents

Table S1. Specific primer sequences in *Prochlorococcus*

Table S2. Efficient sequencing information statistics of 16S rRNA samples

Table S3. OTUs identified in 16S rRNA samples

Table S4. Efficient sequencing information statistics of nifH samples

Table S5. OTUs identified in nifH samples

Table S6. Total COGs predicted based on the bacterial OTUs

Table S7. T test of correlation analysis between microbial community diversities and environmental factors

**Table S1. Specific primer sequences in *Prochlorococcus***

| Gene        | F (5'-3')            | R (5'-3')               |
|-------------|----------------------|-------------------------|
| <i>amt1</i> | ACCTGYTGGATTGCTGGTCT | AAGTCKGGATAWGCYTCCAT    |
| <i>ureC</i> | GTAATAGCTGGTGAGGGGCA | CCCGGAGTACAAGTAGTGGC    |
| <i>glnA</i> | CCCCTAACTGGTCCAAGTCC | ACCAGCCATCATCATTGCAC    |
| <i>gltS</i> | CACCGATCTGACGATCCTGG | TCGACAACTGGACCGTGAAG    |
| <i>AAT</i>  | TCTGAGCGGTCAAGCGATT  | CCTGGTACTTGATCGGGGTG    |
| <i>urtA</i> | CWGGWCCYTGWGGRGATCRA | ACTAYGGYGCTTGGAACATACAT |
| <i>nirA</i> | TAGAAGACTGCGTGAAGCCG | AGTGGATTGCCGGTTACGTT    |
| <i>IdiA</i> | CCGAGCAGGTGAGCAGTTAT | ACTGGTTGTAGACACTGCGG    |

**Table S2. Efficient sequencing information statistics of 16S rRNA samples**

| Sample     | Reads  | Base      | Mean   | Min | Max | OTU  | Cover. | Ace | Shannon |
|------------|--------|-----------|--------|-----|-----|------|--------|-----|---------|
| SEATS_sur  | 63804  | 27571230  | 432.12 | 387 | 454 | 468  | 99.85  | 517 | 3.50    |
| SEATS_68m  | 70929  | 31447507  | 443.36 | 332 | 466 | 394  | 99.83  | 470 | 3.27    |
| SEATS_200m | 77982  | 34696980  | 444.93 | 298 | 462 | 741  | 99.74  | 867 | 3.04    |
| SEATS_750m | 72767  | 32471293  | 446.23 | 278 | 515 | 633  | 99.74  | 756 | 2.72    |
| SS1_sur    | 81677  | 35129984  | 430.10 | 291 | 462 | 496  | 99.87  | 555 | 2.63    |
| SS1_105m   | 93821  | 40314095  | 429.69 | 338 | 493 | 488  | 99.91  | 530 | 3.29    |
| SS1_200m   | 80679  | 35127502  | 435.39 | 366 | 462 | 893  | 99.84  | 956 | 5.03    |
| SS1_750m   | 71756  | 31308923  | 436.32 | 305 | 467 | 843  | 99.94  | 857 | 4.78    |
| A2_surface | 61845  | 26649347  | 430.90 | 270 | 464 | 506  | 99.85  | 559 | 3.01    |
| B1_sur     | 64261  | 27721347  | 431.38 | 365 | 492 | 479  | 99.83  | 539 | 3.38    |
| C1_sur     | 83617  | 36018895  | 430.76 | 347 | 464 | 461  | 99.86  | 545 | 3.02    |
| Total      | 823138 | 358457103 | 435.47 | 325 | 473 | 1427 | 99.85  | 517 | 3.50    |

**Table S4. Efficient sequencing information statistics of nifH samples**

| Sample     | Reads  | Base     | Mean   | Min | Max | OTU | Cover. | Ace | Shannon |
|------------|--------|----------|--------|-----|-----|-----|--------|-----|---------|
| SEATs_sur  | 10090  | 4358673  | 431.97 | 268 | 533 | 128 | 99.58  | 196 | 2.45    |
| SEATs_68m  | 16019  | 6739420  | 420.71 | 205 | 530 | 149 | 99.89  | 155 | 2.73    |
| SEATs_200m | 10370  | 4366260  | 421.04 | 214 | 532 | 221 | 99.91  | 222 | 4.48    |
| SEATs_750m | 13919  | 5940517  | 426.79 | 204 | 551 | 170 | 99.90  | 174 | 3.47    |
| SS1_sur    | 12974  | 5493021  | 423.38 | 223 | 549 | 230 | 99.53  | 280 | 3.04    |
| SS1_105m   | 13192  | 5620397  | 426.04 | 210 | 533 | 119 | 99.84  | 131 | 2.59    |
| SS1_200m   | 13201  | 5577525  | 422.50 | 243 | 552 | 150 | 99.81  | 162 | 2.56    |
| A2_sur     | 19717  | 7721344  | 391.60 | 207 | 553 | 215 | 99.87  | 226 | 3.43    |
| B1_sur     | 11603  | 4816444  | 415.10 | 233 | 523 | 217 | 99.65  | 243 | 3.21    |
| C1_sur     | 10484  | 4326312  | 412.65 | 219 | 533 | 212 | 99.65  | 234 | 3.60    |
| Total      | 131569 | 54959913 | 417.72 | 223 | 539 | 749 | 99.76  | 202 | 3.16    |

**Table S7. T test of correlation analysis between microbial community diversities and environmental factors**

|                        |             |             | <b>T</b> | <b>Salinity</b> | <b>Chl a</b> | <b>NO<sub>2</sub><sup>-</sup></b> | <b>NO<sub>3</sub><sup>-</sup></b> | <b>PO<sub>4</sub><sup>3-</sup></b> | <b>SiO<sub>3</sub><sup>2-</sup></b> | <b>DO</b> |
|------------------------|-------------|-------------|----------|-----------------|--------------|-----------------------------------|-----------------------------------|------------------------------------|-------------------------------------|-----------|
| Bacterial diversity    | OTUs        | Correlation | -0.518   | 0.2             | -0.700*      | -0.1                              | 0.648*                            | 0.778**                            | 0.591                               | -0.793**  |
|                        |             | P-value     | 0.102    | 0.555           | 0.016        | 0.77                              | 0.031                             | 0.005                              | 0.056                               | 0.004     |
|                        | Ace         | Correlation | -0.445   | 0.077           | -0.773**     | -0.3                              | 0.563                             | 0.689*                             | 0.573                               | -0.692*   |
|                        |             | P-value     | 0.17     | 0.821           | 0.005        | 0.37                              | 0.072                             | 0.019                              | 0.066                               | 0.018     |
|                        | Shannon     | Correlation | -0.327   | 0.465           | -0.273       | 0.1                               | 0.181                             | 0.243                              | 0.2                                 | -0.323    |
|                        |             | P-value     | 0.326    | 0.15            | 0.417        | 0.77                              | 0.594                             | 0.472                              | 0.555                               | 0.332     |
|                        | PCoA axis 1 | Correlation | -0.909** | 0.761**         | -0.6         | 0                                 | 0.915**                           | 0.843**                            | 0.800**                             | -0.692*   |
|                        |             | P-value     | 0        | 0.007           | 0.051        | 1                                 | 0                                 | 0.001                              | 0.003                               | 0.018     |
|                        | Bray-Curtis | Correlation | 0.7974** | 0.2829*         | 0.09156      | -0.1544                           | 0.7653**                          | 0.7**                              | 0.7374**                            | 0.6728**  |
|                        |             | P-value     | 0.002    | 0.043           | 0.265        | 0.837                             | 0.001                             | 0.002                              | 0.003                               | 0.002     |
| Diazotrophic diversity | OTUs        | Correlation | 0.394    | -0.565          | -0.333       | -0.522                            | -0.2                              | -0.089                             | -0.079                              | 0.225     |
|                        |             | P-value     | 0.26     | 0.089           | 0.347        | 0.122                             | 0.579                             | 0.807                              | 0.829                               | 0.532     |
|                        | Ace         | Correlation | 0.697*   | -0.863**        | -0.176       | -0.522                            | -0.627                            | -0.464                             | -0.491                              | 0.413     |
|                        |             | P-value     | 0.025    | 0.001           | 0.627        | 0.122                             | 0.052                             | 0.176                              | 0.15                                | 0.235     |
|                        | Shannon     | Correlation | -0.079   | -0.316          | -0.285       | -0.29                             | 0.162                             | 0.225                              | 0.333                               | -0.061    |
|                        |             | P-value     | 0.829    | 0.374           | 0.425        | 0.416                             | 0.656                             | 0.531                              | 0.347                               | 0.868     |
|                        | PCoA axis 1 | Correlation | -0.685*  | 0.766**         | -0.127       | 0.406                             | 0.769**                           | 0.676*                             | 0.648*                              | -0.529    |
|                        |             | P-value     | 0.029    | 0.01            | 0.726        | 0.244                             | 0.009                             | 0.032                              | 0.043                               | 0.116     |
|                        | Bray-Curtis | Correlation | 0.5637*  | 0.2271          | 0.2194       | 0.2652                            | 0.5452*                           | 0.5185*                            | 0.5415*                             | 0.5045*   |
|                        |             | P-value     | 0.012    | 0.053           | 0.138        | 0.286                             | 0.013                             | 0.017                              | 0.018                               | 0.016     |
