# Supplementary material for: Diversity, distribution and nitrogen use strategies of bacteria in the South China Sea basin
Source: Copernicus journal article supplement (doi:10.5194/bg-2018-529), 2019-02-12
Supplement: Supplementary file 1 [file Table S3.xlsx]

## Sheet: Sheet1
Table S3. OTUs identified in 16S rRNA samples
OTU ID	SEATs_surface	SEATs_68m	SEATs_200m	SEATs_750m	SS1_surface	SS1_105m	SS1_200m	SS1_750m	A2_surface	B1_surface	C1_surface	taxonomy
OTU1	1	0	0	0	1	0	0	0	1	1	0	d__Bacteria;k__norank;p__Proteobacteria;c__Gammaproteobacteria;o__Legionellales;f__Coxiellaceae;g__Coxiella;s__unclassified_g__Coxiella
OTU2	0	0	0	0	1	1	0	0	1	1	1	d__Bacteria;k__norank;p__Proteobacteria;c__Deltaproteobacteria;o__Bdellovibrionales;f__Bdellovibrionaceae;g__OM27_clade;s__uncultured_marine_microorganism_g__OM27_clade
OTU3	1	0	0	0	1	0	0	1	1	0	1	d__Bacteria;k__norank;p__Proteobacteria;c__Alphaproteobacteria;o__Caulobacterales;f__Hyphomonadaceae;g__norank_f__Hyphomonadaceae;s__Scytonema_millei_VB511283_g__norank_f__Hyphomonadaceae
OTU4	1	1	0	0	1	1	0	0	1	1	1	d__Bacteria;k__norank;p__Proteobacteria;c__Gammaproteobacteria;o__Legionellales;f__Coxiellaceae;g__Coxiella;s__uncultured_bacterium_g__Coxiella
OTU5	1	1	0	0	1	1	0	0	1	0	1	d__Bacteria;k__norank;p__Proteobacteria;c__Deltaproteobacteria;o__Bdellovibrionales;f__Bdellovibrionaceae;g__OM27_clade;s__uncultured_organism_g__OM27_clade
OTU6	1	1	0	0	1	0	0	0	1	1	1	d__Bacteria;k__norank;p__Proteobacteria;c__Deltaproteobacteria;o__Bdellovibrionales;f__Bdellovibrionaceae;g__OM27_clade;s__uncultured_marine_microorganism_g__OM27_clade
OTU7	1	1	0	0	1	0	0	0	1	1	1	d__Bacteria;k__norank;p__Cyanobacteria;c__Cyanobacteria;o__norank_c__Cyanobacteria;f__norank_c__Cyanobacteria;g__norank_c__Cyanobacteria;s__uncultured_marine_eukaryote
OTU8	1	0	0	0	1	0	0	0	1	1	1	d__Bacteria;k__norank;p__Proteobacteria;c__Alphaproteobacteria;o__Rhodobacterales;f__Rhodobacteraceae;g__Roseovarius;s__uncultured_Roseobacter_sp._g__Roseovarius
OTU9	0	0	0	0	1	0	0	0	1	1	1	d__Bacteria;k__norank;p__Cyanobacteria;c__Cyanobacteria;o__Caenarcaniphilales;f__norank_o__Caenarcaniphilales;g__norank_o__Caenarcaniphilales;s__uncultured_bacterium_g__norank_o__Caenarcaniphilales
OTU10	1	1	1	1	1	1	1	1	1	1	1	d__Bacteria;k__norank;p__Bacteroidetes;c__Flavobacteriia;o__Flavobacteriales;f__NS9_marine_group;g__norank_f__NS9_marine_group;s__unclassified_g__norank_f__NS9_marine_group
OTU11	0	0	0	0	1	0	0	0	1	1	1	d__Bacteria;k__norank;p__Proteobacteria;c__Deltaproteobacteria;o__Bdellovibrionales;f__Bdellovibrionaceae;g__Bdellovibrio;s__uncultured_marine_bacterium_g__Bdellovibrio
OTU12	1	1	0	0	1	1	1	0	1	1	1	d__Bacteria;k__norank;p__Marinimicrobia__SAR406_clade_;c__norank_p__Marinimicrobia__SAR406_clade_;o__norank_p__Marinimicrobia__SAR406_clade_;f__norank_p__Marinimicrobia__SAR406_clade_;g__norank_p__Marinimicrobia__SAR406_clade_;s__uncultured_bacterium_405006-B04
OTU13	1	0	0	0	1	0	0	1	1	1	1	d__Bacteria;k__norank;p__Bacteroidetes;c__Flavobacteriia;o__Flavobacteriales;f__Flavobacteriaceae;g__unclassified_f__Flavobacteriaceae;s__unclassified_f__Flavobacteriaceae
OTU14	1	1	1	1	1	1	1	1	1	1	1	d__Bacteria;k__norank;p__Cyanobacteria;c__Cyanobacteria;o__SubsectionI;f__FamilyI_o__SubsectionI;g__Synechococcus;s__unclassified_g__Synechococcus
OTU15	1	0	0	0	0	0	0	0	1	1	1	d__Bacteria;k__norank;p__Proteobacteria;c__Alphaproteobacteria;o__Alphaproteobacteria_Incertae_Sedis;f__Unknown_Family_o__Alphaproteobacteria_Incertae_Sedis;g__norank_f__Unknown_Family_o__Alphaproteobacteria_Incertae_Sedis;s__uncultured_bacterium_g__norank_f__Unknown_Family_o__Alphaproteobacteria_Incertae_Sedis
OTU16	1	0	0	0	1	0	0	0	1	1	1	d__Bacteria;k__norank;p__Cyanobacteria;c__Cyanobacteria;o__norank_c__Cyanobacteria;f__norank_c__Cyanobacteria;g__norank_c__Cyanobacteria;s__uncultured_bacterium_g__norank_c__Cyanobacteria
OTU17	1	1	0	1	1	1	0	1	1	1	1	d__Bacteria;k__norank;p__Proteobacteria;c__Deltaproteobacteria;o__Bradymonadales;f__norank_o__Bradymonadales;g__norank_o__Bradymonadales;s__uncultured_delta_proteobacterium_DeepAnt-1F12
OTU18	1	1	1	0	1	1	1	1	1	1	1	d__Bacteria;k__norank;p__Proteobacteria;c__Deltaproteobacteria;o__Bdellovibrionales;f__Bdellovibrionaceae;g__OM27_clade;s__uncultured_marine_bacterium_g__OM27_clade
OTU19	1	1	0	0	1	1	1	0	1	1	1	d__Bacteria;k__norank;p__Proteobacteria;c__Alphaproteobacteria;o__Rhizobiales;f__PS1_clade;g__norank_f__PS1_clade;s__uncultured_bacterium_g__norank_f__PS1_clade
OTU20	1	0	0	0	1	0	0	0	1	0	1	d__Bacteria;k__norank;p__Cyanobacteria;c__Cyanobacteria;o__norank_c__Cyanobacteria;f__norank_c__Cyanobacteria;g__norank_c__Cyanobacteria;s__uncultured_bacterium_g__norank_c__Cyanobacteria
OTU21	0	0	0	0	0	0	1	1	1	1	1	d__Bacteria;k__norank;p__Proteobacteria;c__Deltaproteobacteria;o__Bdellovibrionales;f__Bacteriovoracaceae;g__Peredibacter;s__marine_metagenome_g__Peredibacter
OTU22	1	0	0	0	1	0	1	1	1	1	1	d__Bacteria;k__norank;p__Bacteroidetes;c__Sphingobacteriia;o__Sphingobacteriales;f__norank_o__Sphingobacteriales;g__norank_o__Sphingobacteriales;s__uncultured_Sphingobacteriia_bacterium_g__norank_o__Sphingobacteriales
OTU23	1	1	0	0	1	1	0	0	1	1	1	d__Bacteria;k__norank;p__Bacteroidetes;c__Flavobacteriia;o__Flavobacteriales;f__Flavobacteriaceae;g__NS5_marine_group;s__uncultured_bacterium_g__NS5_marine_group
OTU24	0	1	0	0	1	0	0	1	1	1	1	d__Bacteria;k__norank;p__Proteobacteria;c__Alphaproteobacteria;o__Rhodobacterales;f__Rhodobacteraceae;g__Labrenzia;s__Labrenzia_aggregata
OTU25	1	0	0	0	1	0	0	0	1	1	1	d__Bacteria;k__norank;p__Bacteroidetes;c__Flavobacteriia;o__Flavobacteriales;f__NS9_marine_group;g__norank_f__NS9_marine_group;s__uncultured_Flavobacteriales_bacterium_g__norank_f__NS9_marine_group
OTU26	0	0	0	0	1	0	0	0	1	1	1	d__Bacteria;k__norank;p__Proteobacteria;c__Deltaproteobacteria;o__Bdellovibrionales;f__Bacteriovoracaceae;g__unclassified_f__Bacteriovoracaceae;s__unclassified_f__Bacteriovoracaceae
OTU27	1	0	0	0	1	0	0	0	1	1	1	d__Bacteria;k__norank;p__Cyanobacteria;c__Cyanobacteria;o__norank_c__Cyanobacteria;f__norank_c__Cyanobacteria;g__norank_c__Cyanobacteria;s__uncultured_bacterium_g__norank_c__Cyanobacteria
OTU28	1	1	1	1	1	1	0	0	1	1	1	d__Bacteria;k__norank;p__Verrucomicrobia;c__Opitutae;o__MB11C04_marine_group;f__norank_o__MB11C04_marine_group;g__norank_o__MB11C04_marine_group;s__unclassified_g__norank_o__MB11C04_marine_group
OTU29	0	0	0	0	1	0	0	1	1	0	0	d__Bacteria;k__norank;p__Firmicutes;c__Bacilli;o__Lactobacillales;f__Streptococcaceae;g__Streptococcus;s__unclassified_g__Streptococcus
OTU30	0	1	1	1	0	1	1	1	1	1	1	d__Bacteria;k__norank;p__Proteobacteria;c__Alphaproteobacteria;o__Rhodobacterales;f__Rhodobacteraceae;g__Sulfitobacter;s__unclassified_g__Sulfitobacter
OTU31	1	0	0	0	0	0	0	1	1	1	1	d__Bacteria;k__norank;p__Proteobacteria;c__Gammaproteobacteria;o__Alteromonadales;f__Alteromonadaceae;g__Marinobacter;s__Marinobacter_algicola
OTU32	0	0	0	0	1	0	0	0	1	1	1	d__Bacteria;k__norank;p__Bacteroidetes;c__Flavobacteriia;o__Flavobacteriales;f__Flavobacteriaceae;g__Tenacibaculum;s__Tenacibaculum_jejuense
OTU33	1	1	0	1	0	0	1	0	1	0	0	d__Bacteria;k__norank;p__Proteobacteria;c__Betaproteobacteria;o__Burkholderiales;f__Burkholderiaceae;g__Limnobacter;s__unclassified_g__Limnobacter
OTU34	1	1	1	0	1	1	0	1	1	1	1	d__Bacteria;k__norank;p__Proteobacteria;c__Alphaproteobacteria;o__Rickettsiales;f__S25-593;g__norank_f__S25-593;s__unclassified_g__norank_f__S25-593
OTU35	1	0	0	0	1	0	0	0	1	1	1	d__Bacteria;k__norank;p__Proteobacteria;c__Alphaproteobacteria;o__Rhodospirillales;f__Rhodospirillaceae;g__Magnetospira;s__uncultured_bacterium_g__Magnetospira
OTU36	1	1	0	0	1	0	0	0	1	1	1	d__Bacteria;k__norank;p__Proteobacteria;c__Deltaproteobacteria;o__Bdellovibrionales;f__Bdellovibrionaceae;g__OM27_clade;s__uncultured_delta_proteobacterium_g__OM27_clade
OTU37	0	0	0	0	0	0	0	0	1	1	1	d__Bacteria;k__norank;p__Proteobacteria;c__Alphaproteobacteria;o__Alphaproteobacteria_Incertae_Sedis;f__unclassified_o__Alphaproteobacteria_Incertae_Sedis;g__unclassified_o__Alphaproteobacteria_Incertae_Sedis;s__unclassified_o__Alphaproteobacteria_Incertae_Sedis
OTU38	1	0	0	0	1	0	0	1	1	1	1	d__Bacteria;k__norank;p__Proteobacteria;c__Alphaproteobacteria;o__unclassified_c__Alphaproteobacteria;f__unclassified_c__Alphaproteobacteria;g__unclassified_c__Alphaproteobacteria;s__unclassified_c__Alphaproteobacteria
OTU39	1	0	0	0	0	0	1	1	1	0	0	d__Bacteria;k__norank;p__Bacteroidetes;c__Flavobacteriia;o__Flavobacteriales;f__Flavobacteriaceae;g__Muricauda;s__unclassified_g__Muricauda
OTU40	1	1	0	0	1	1	1	1	1	1	1	d__Bacteria;k__norank;p__Bacteroidetes;c__Flavobacteriia;o__Flavobacteriales;f__NS7_marine_group;g__norank_f__NS7_marine_group;s__uncultured_bacterium_g__norank_f__NS7_marine_group
OTU41	1	1	1	1	1	1	0	0	1	1	1	d__Bacteria;k__norank;p__Proteobacteria;c__Alphaproteobacteria;o__Rickettsiales;f__SAR116_clade;g__norank_f__SAR116_clade;s__unclassified_g__norank_f__SAR116_clade
OTU42	1	0	0	0	1	0	0	0	1	0	0	d__Bacteria;k__norank;p__Bacteroidetes;c__Bacteroidetes_Incertae_Sedis;o__Order_III;f__Unknown_Family_o__Order_III;g__Balneola;s__unclassified_g__Balneola
OTU43	1	1	0	0	1	0	1	1	1	1	1	d__Bacteria;k__norank;p__Proteobacteria;c__Alphaproteobacteria;o__4-Org1-14;f__norank_o__4-Org1-14;g__norank_o__4-Org1-14;s__uncultured_bacterium_g__norank_o__4-Org1-14
OTU44	1	0	0	0	1	0	0	0	1	1	0	d__Bacteria;k__norank;p__Planctomycetes;c__unclassified_p__Planctomycetes;o__unclassified_p__Planctomycetes;f__unclassified_p__Planctomycetes;g__unclassified_p__Planctomycetes;s__unclassified_p__Planctomycetes
OTU45	1	0	0	0	1	0	0	0	1	0	1	d__Bacteria;k__norank;p__Acidobacteria;c__Acidobacteria;o__Solibacterales;f__Solibacteraceae__Subgroup_3_;g__PAUC26f;s__unclassified_g__PAUC26f
OTU46	0	0	0	0	1	1	0	0	1	0	0	d__Bacteria;k__norank;p__Proteobacteria;c__Alphaproteobacteria;o__Rickettsiales;f__Mitochondria;g__norank_f__Mitochondria;s__uncultured_Rickettsiales_bacterium_g__norank
OTU47	1	1	1	0	1	1	1	1	1	1	1	d__Bacteria;k__norank;p__SBR1093;c__norank_p__SBR1093;o__norank_p__SBR1093;f__norank_p__SBR1093;g__norank_p__SBR1093;s__marine_metagenome_g__norank_p__SBR1093
OTU48	1	0	0	0	1	0	0	0	1	1	1	d__Bacteria;k__norank;p__Cyanobacteria;c__Cyanobacteria;o__norank_c__Cyanobacteria;f__norank_c__Cyanobacteria;g__norank_c__Cyanobacteria;s__unclassified_g__norank_c__Cyanobacteria
OTU49	1	0	0	0	1	0	0	0	1	0	1	d__Bacteria;k__norank;p__Bacteroidetes;c__Flavobacteriia;o__Flavobacteriales;f__NS7_marine_group;g__norank_f__NS7_marine_group;s__unclassified_g__norank_f__NS7_marine_group
OTU50	1	1	0	0	1	1	0	0	1	1	1	d__Bacteria;k__norank;p__Proteobacteria;c__Alphaproteobacteria;o__Rickettsiales;f__SAR116_clade;g__norank_f__SAR116_clade;s__unclassified_g__norank_f__SAR116_clade
OTU51	0	1	0	0	0	1	1	0	1	0	0	d__Bacteria;k__norank;p__Proteobacteria;c__Deltaproteobacteria;o__Oligoflexales;f__053A03-B-DI-P58;g__norank_f__053A03-B-DI-P58;s__uncultured_bacterium_g__norank_f__053A03-B-DI-P58
OTU52	1	1	1	1	1	1	1	1	1	1	1	d__Bacteria;k__norank;p__Proteobacteria;c__Alphaproteobacteria;o__Rhodospirillales;f__Rhodospirillaceae;g__AEGEAN-169_marine_group;s__uncultured_marine_bacterium_g__AEGEAN-169_marine_group
OTU53	1	1	0	0	1	1	0	0	1	1	1	d__Bacteria;k__norank;p__Proteobacteria;c__unclassified_p__Proteobacteria;o__unclassified_p__Proteobacteria;f__unclassified_p__Proteobacteria;g__unclassified_p__Proteobacteria;s__unclassified_p__Proteobacteria
OTU54	0	0	1	0	1	1	1	1	1	1	1	d__Bacteria;k__norank;p__unclassified_k__norank;c__unclassified_k__norank;o__unclassified_k__norank;f__unclassified_k__norank;g__unclassified_k__norank;s__unclassified_k__norank
OTU55	1	0	0	0	1	0	0	0	1	1	0	d__Bacteria;k__norank;p__Proteobacteria;c__Deltaproteobacteria;o__Bdellovibrionales;f__Bdellovibrionaceae;g__OM27_clade;s__unclassified_g__OM27_clade
OTU56	1	0	0	0	1	0	0	1	1	0	0	d__Bacteria;k__norank;p__Proteobacteria;c__Deltaproteobacteria;o__Bdellovibrionales;f__Bdellovibrionaceae;g__Bdellovibrio;s__unclassified_g__Bdellovibrio
OTU57	1	0	0	0	1	1	1	0	1	1	1	d__Bacteria;k__norank;p__Proteobacteria;c__Gammaproteobacteria;o__Legionellales;f__Coxiellaceae;g__Coxiella;s__uncultured_bacterium_g__Coxiella
OTU58	1	1	1	0	1	1	1	0	1	1	1	d__Bacteria;k__norank;p__Proteobacteria;c__Alphaproteobacteria;o__Rhodospirillales;f__Rhodospirillaceae;g__norank_f__Rhodospirillaceae;s__uncultured_SAR11_cluster_alpha_proteobacterium_g__norank_f__Rhodospirillaceae
OTU59	1	0	0	0	1	0	0	0	1	1	1	d__Bacteria;k__norank;p__Planctomycetes;c__OM190;o__norank_c__OM190;f__norank_c__OM190;g__norank_c__OM190;s__uncultured_Planctomycetaceae_bacterium_g__norank_c__OM190
OTU60	1	0	0	0	0	0	0	0	1	1	0	d__Bacteria;k__norank;p__Firmicutes;c__Clostridia;o__Clostridiales;f__Clostridiaceae_1;g__Oceanirhabdus;s__Oceanirhabdus_sediminicola
OTU61	1	1	0	0	1	1	1	0	1	1	1	d__Bacteria;k__norank;p__Proteobacteria;c__Alphaproteobacteria;o__Rhodospirillales;f__Rhodospirillaceae;g__norank_f__Rhodospirillaceae;s__unidentified_marine_bacterioplankton_g__norank_f__Rhodospirillaceae
OTU62	1	1	1	0	1	0	0	0	1	1	1	d__Bacteria;k__norank;p__Proteobacteria;c__Deltaproteobacteria;o__Bdellovibrionales;f__Bacteriovoracaceae;g__norank_f__Bacteriovoracaceae;s__unclassified_g__norank_f__Bacteriovoracaceae
OTU63	1	1	0	0	1	1	1	0	1	1	1	d__Bacteria;k__norank;p__Proteobacteria;c__Deltaproteobacteria;o__Bdellovibrionales;f__Bdellovibrionaceae;g__OM27_clade;s__unclassified_g__OM27_clade
OTU64	1	1	1	0	1	1	1	1	1	1	1	d__Bacteria;k__norank;p__Proteobacteria;c__Gammaproteobacteria;o__Thiotrichales;f__Thiotrichaceae;g__Thiothrix;s__uncultured_marine_bacterium_g__Thiothrix
OTU65	0	0	0	0	0	0	0	0	1	1	0	d__Bacteria;k__norank;p__Verrucomicrobia;c__Opitutae;o__Opitutae_vadinHA64;f__norank_o__Opitutae_vadinHA64;g__norank_o__Opitutae_vadinHA64;s__unclassified_g__norank_o__Opitutae_vadinHA64
OTU66	0	0	0	0	0	0	0	0	1	1	1	d__Bacteria;k__norank;p__Planctomycetes;c__Pla3_lineage;o__norank_c__Pla3_lineage;f__norank_c__Pla3_lineage;g__norank_c__Pla3_lineage;s__unclassified_g__norank_c__Pla3_lineage
OTU67	0	0	0	0	1	0	0	0	1	1	0	d__Bacteria;k__norank;p__Acidobacteria;c__Acidobacteria;o__Acanthopleuribacterales;f__Acanthopleuribacteraceae;g__Acanthopleuribacter;s__Acanthopleuribacter_pedis
OTU68	1	0	0	0	1	0	0	0	1	1	1	d__Bacteria;k__norank;p__Proteobacteria;c__Gammaproteobacteria;o__Thiotrichales;f__Piscirickettsiaceae;g__Cycloclasticus;s__unclassified_g__Cycloclasticus
OTU69	1	0	0	0	1	0	0	0	1	1	1	d__Bacteria;k__norank;p__Cyanobacteria;c__Cyanobacteria;o__norank_c__Cyanobacteria;f__norank_c__Cyanobacteria;g__norank_c__Cyanobacteria;s__uncultured_bacterium_g__norank_c__Cyanobacteria
OTU70	1	0	0	0	1	0	1	0	1	1	1	d__Bacteria;k__norank;p__Proteobacteria;c__Gammaproteobacteria;o__Oceanospirillales;f__Alcanivoracaceae;g__Alcanivorax;s__Alcanivorax_indicus
OTU71	1	1	1	1	1	1	1	1	1	1	1	d__Bacteria;k__norank;p__Proteobacteria;c__Alphaproteobacteria;o__Rhodospirillales;f__Rhodospirillaceae;g__AEGEAN-169_marine_group;s__alpha_proteobacterium_HIMB59
OTU72	1	1	1	1	1	1	1	1	1	1	1	d__Bacteria;k__norank;p__Verrucomicrobia;c__Verrucomicrobiae;o__Verrucomicrobiales;f__DEV007;g__norank_f__DEV007;s__hydrothermal_vent_metagenome_g__norank_f__DEV007
OTU73	1	1	1	0	1	1	0	0	1	1	1	d__Bacteria;k__norank;p__Bacteroidetes;c__Flavobacteriia;o__Flavobacteriales;f__Flavobacteriaceae;g__NS4_marine_group;s__unclassified_g__NS4_marine_group
OTU74	1	0	0	0	1	0	0	0	1	1	1	d__Bacteria;k__norank;p__Bacteroidetes;c__Flavobacteriia;o__Flavobacteriales;f__Flavobacteriaceae;g__NS4_marine_group;s__uncultured_Flavobacteriia_bacterium_g__NS4_marine_group
OTU75	0	0	0	0	1	0	0	0	1	1	1	d__Bacteria;k__norank;p__Proteobacteria;c__Gammaproteobacteria;o__KI89A_clade;f__norank_o__KI89A_clade;g__norank_o__KI89A_clade;s__uncultured_bacterium_g__norank_o__KI89A_clade
OTU76	0	0	0	0	1	0	0	0	1	1	1	d__Bacteria;k__norank;p__Proteobacteria;c__Deltaproteobacteria;o__Bdellovibrionales;f__Bdellovibrionaceae;g__Bdellovibrio;s__uncultured_marine_bacterium_g__Bdellovibrio
OTU77	0	0	0	0	1	0	0	0	1	1	1	d__Bacteria;k__norank;p__TM6__Dependentiae_;c__norank_p__TM6__Dependentiae_;o__norank_p__TM6__Dependentiae_;f__norank_p__TM6__Dependentiae_;g__norank_p__TM6__Dependentiae_;s__unclassified_g__norank_p__TM6__Dependentiae_
OTU78	0	0	0	0	0	0	0	0	1	1	1	d__Bacteria;k__norank;p__Proteobacteria;c__Gammaproteobacteria;o__unclassified_c__Gammaproteobacteria;f__unclassified_c__Gammaproteobacteria;g__unclassified_c__Gammaproteobacteria;s__unclassified_c__Gammaproteobacteria
OTU79	0	0	0	0	0	0	0	0	1	1	1	d__Bacteria;k__norank;p__Bacteroidetes;c__Flavobacteriia;o__Flavobacteriales;f__Flavobacteriaceae;g__Tenacibaculum;s__unclassified_g__Tenacibaculum
OTU80	0	0	0	0	1	0	0	0	1	1	0	d__Bacteria;k__norank;p__Planctomycetes;c__OM190;o__norank_c__OM190;f__norank_c__OM190;g__norank_c__OM190;s__unclassified_g__norank_c__OM190
OTU81	1	0	0	0	1	0	0	0	1	1	1	d__Bacteria;k__norank;p__Planctomycetes;c__OM190;o__norank_c__OM190;f__norank_c__OM190;g__norank_c__OM190;s__marine_metagenome_g__norank_c__OM190
OTU82	0	0	0	0	0	0	0	0	1	1	0	d__Bacteria;k__norank;p__Proteobacteria;c__Deltaproteobacteria;o__Bdellovibrionales;f__Bacteriovoracaceae;g__Peredibacter;s__uncultured_Bdellovibrionales_bacterium_g__Peredibacter
OTU83	1	1	0	0	1	1	0	0	1	1	1	d__Bacteria;k__norank;p__Proteobacteria;c__Alphaproteobacteria;o__Rhizobiales;f__OCS116_clade;g__norank_f__OCS116_clade;s__uncultured_marine_microorganism_g__norank_f__OCS116_clade
OTU84	0	0	0	0	0	0	1	0	1	0	1	d__Bacteria;k__norank;p__Proteobacteria;c__Gammaproteobacteria;o__BD7-8_marine_group;f__norank_o__BD7-8_marine_group;g__norank_o__BD7-8_marine_group;s__unclassified_g__norank_o__BD7-8_marine_group
OTU85	1	1	1	0	1	1	1	1	1	1	1	d__Bacteria;k__norank;p__Bacteroidetes;c__Flavobacteriia;o__Flavobacteriales;f__NS9_marine_group;g__norank_f__NS9_marine_group;s__uncultured_Flavobacteriia_bacterium_g__norank_f__NS9_marine_group
OTU86	1	1	0	0	1	1	1	1	1	1	1	d__Bacteria;k__norank;p__Bacteroidetes;c__Flavobacteriia;o__Flavobacteriales;f__Cryomorphaceae;g__norank_f__Cryomorphaceae;s__uncultured_Owenweeksia_sp._g__norank
OTU87	1	1	1	0	1	1	1	0	1	1	1	d__Bacteria;k__norank;p__Proteobacteria;c__Alphaproteobacteria;o__Rhodospirillales;f__Rhodospirillaceae;g__norank_f__Rhodospirillaceae;s__uncultured_marine_bacterium_g__norank_f__Rhodospirillaceae
OTU88	1	0	0	0	1	1	1	1	1	1	1	d__Bacteria;k__norank;p__Bacteroidetes;c__Flavobacteriia;o__Flavobacteriales;f__Flavobacteriaceae;g__Gilvibacter;s__unclassified_g__Gilvibacter
OTU89	1	0	0	0	1	0	0	0	1	1	0	d__Bacteria;k__norank;p__Bacteroidetes;c__Flavobacteriia;o__Flavobacteriales;f__NS9_marine_group;g__norank_f__NS9_marine_group;s__uncultured_bacterium_g__norank_f__NS9_marine_group
OTU90	1	0	0	0	0	0	0	0	1	0	0	d__Bacteria;k__norank;p__Proteobacteria;c__Gammaproteobacteria;o__Vibrionales;f__Vibrionaceae;g__Grimontia;s__Grimontia_indica
OTU91	0	0	0	0	0	0	0	0	1	1	1	d__Bacteria;k__norank;p__Proteobacteria;c__Deltaproteobacteria;o__Oligoflexales;f__Oligoflexaceae;g__norank_f__Oligoflexaceae;s__unclassified_g__norank_f__Oligoflexaceae
OTU92	1	0	0	0	1	1	1	1	1	1	1	d__Bacteria;k__norank;p__Proteobacteria;c__Alphaproteobacteria;o__Rhodobacterales;f__Rhodobacteraceae;g__unclassified_f__Rhodobacteraceae;s__unclassified_f__Rhodobacteraceae
OTU93	1	0	0	0	0	0	0	0	1	1	0	d__Bacteria;k__norank;p__Bacteroidetes;c__Flavobacteriia;o__Flavobacteriales;f__Cryomorphaceae;g__norank_f__Cryomorphaceae;s__uncultured_Flavobacteriales_bacterium_g__norank_f__Cryomorphaceae
OTU94	1	1	0	0	1	1	1	0	1	1	0	d__Bacteria;k__norank;p__Cyanobacteria;c__Cyanobacteria;o__norank_c__Cyanobacteria;f__norank_c__Cyanobacteria;g__norank_c__Cyanobacteria;s__uncultured_deep-sea_bacterium_g__norank_c__Cyanobacteria
OTU95	0	0	0	0	0	0	0	0	1	1	1	d__Bacteria;k__norank;p__Proteobacteria;c__Deltaproteobacteria;o__SAR324_clade_Marine_group_B_;f__norank_o__SAR324_clade_Marine_group_B_;g__norank_o__SAR324_clade_Marine_group_B_;s__unclassified_g__norank_o__SAR324_clade_Marine_group_B_
OTU96	0	0	0	0	0	0	0	0	1	1	0	d__Bacteria;k__norank;p__Proteobacteria;c__Gammaproteobacteria;o__EC3;f__norank_o__EC3;g__norank_o__EC3;s__unclassified_g__norank_o__EC3
OTU97	1	1	1	0	1	1	0	1	1	1	1	d__Bacteria;k__norank;p__Proteobacteria;c__Gammaproteobacteria;o__Oceanospirillales;f__SAR86_clade;g__norank_f__SAR86_clade;s__marine_metagenome_g__norank_f__SAR86_clade
OTU98	1	0	0	0	1	0	0	0	1	1	1	d__Bacteria;k__norank;p__Proteobacteria;c__Gammaproteobacteria;o__Cellvibrionales;f__Halieaceae;g__Parahaliea;s__uncultured_bacterium_g__Parahaliea
OTU99	0	0	0	1	1	0	0	1	1	1	1	d__Bacteria;k__norank;p__Proteobacteria;c__Alphaproteobacteria;o__Rhizobiales;f__unclassified_o__Rhizobiales;g__unclassified_o__Rhizobiales;s__unclassified_o__Rhizobiales
OTU100	0	0	1	0	0	0	0	1	1	1	0	d__Bacteria;k__norank;p__Proteobacteria;c__Gammaproteobacteria;o__Oceanospirillales;f__Oceanospirillaceae;g__Oleispira;s__uncultured_bacterium_g__Oleispira
OTU101	1	0	0	1	1	1	1	1	1	1	1	d__Bacteria;k__norank;p__Proteobacteria;c__Gammaproteobacteria;o__Oceanospirillales;f__Alcanivoracaceae;g__Kangiella;s__Kangiella_marina
OTU102	1	1	0	0	1	1	0	0	1	1	1	d__Bacteria;k__norank;p__Proteobacteria;c__Betaproteobacteria;o__Burkholderiales;f__Alcaligenaceae;g__MWH-UniP1_aquatic_group;s__marine_metagenome_g__MWH-UniP1_aquatic_group
OTU103	1	0	0	0	0	0	0	0	1	0	1	d__Bacteria;k__norank;p__Chloroflexi;c__SAR202_clade;o__norank_c__SAR202_clade;f__norank_c__SAR202_clade;g__norank_c__SAR202_clade;s__unclassified_g__norank_c__SAR202_clade
OTU104	1	1	1	0	1	1	1	0	1	1	1	d__Bacteria;k__norank;p__Cyanobacteria;c__Cyanobacteria;o__norank_c__Cyanobacteria;f__norank_c__Cyanobacteria;g__norank_c__Cyanobacteria;s__uncultured_prymnesiophyte_C8704
OTU105	1	0	0	0	1	1	0	0	1	1	1	d__Bacteria;k__norank;p__Cyanobacteria;c__Cyanobacteria;o__norank_c__Cyanobacteria;f__norank_c__Cyanobacteria;g__norank_c__Cyanobacteria;s__uncultured_marine_rappemonad
OTU106	1	1	1	0	1	1	1	1	1	1	1	d__Bacteria;k__norank;p__Proteobacteria;c__Gammaproteobacteria;o__Oceanospirillales;f__SAR86_clade;g__norank_f__SAR86_clade;s__uncultured_bacterium_g__norank_f__SAR86_clade
OTU107	1	1	0	1	1	0	0	0	1	1	1	d__Bacteria;k__norank;p__Proteobacteria;c__Gammaproteobacteria;o__Oceanospirillales;f__SAR86_clade;g__norank_f__SAR86_clade;s__unclassified_g__norank_f__SAR86_clade
OTU108	1	1	0	0	1	0	0	0	1	1	1	d__Bacteria;k__norank;p__Bacteroidetes;c__Flavobacteriia;o__Flavobacteriales;f__NS9_marine_group;g__norank_f__NS9_marine_group;s__uncultured_Flavobacteriales_bacterium_g__norank_f__NS9_marine_group
OTU109	1	1	0	0	1	1	0	0	1	1	1	d__Bacteria;k__norank;p__Cyanobacteria;c__Cyanobacteria;o__norank_c__Cyanobacteria;f__norank_c__Cyanobacteria;g__norank_c__Cyanobacteria;s__unclassified_g__norank_c__Cyanobacteria
OTU110	1	1	0	0	1	0	0	0	1	1	1	d__Bacteria;k__norank;p__Actinobacteria;c__Actinobacteria;o__Acidimicrobiales;f__Acidimicrobiaceae;g__norank_f__Acidimicrobiaceae;s__uncultured_marine_bacterium_g__norank_f__Acidimicrobiaceae
OTU111	1	0	0	0	0	0	0	0	1	0	1	d__Bacteria;k__norank;p__Proteobacteria;c__Gammaproteobacteria;o__unclassified_c__Gammaproteobacteria;f__unclassified_c__Gammaproteobacteria;g__unclassified_c__Gammaproteobacteria;s__unclassified_c__Gammaproteobacteria
OTU112	1	0	0	1	1	1	1	1	1	1	1	d__Bacteria;k__norank;p__Proteobacteria;c__Gammaproteobacteria;o__Oceanospirillales;f__Alcanivoracaceae;g__Alcanivorax;s__unclassified_g__Alcanivorax
OTU113	0	0	0	0	1	0	0	0	1	0	1	d__Bacteria;k__norank;p__Planctomycetes;c__OM190;o__norank_c__OM190;f__norank_c__OM190;g__norank_c__OM190;s__unclassified_g__norank_c__OM190
OTU114	1	0	0	0	1	0	1	0	1	1	1	d__Bacteria;k__norank;p__Proteobacteria;c__Gammaproteobacteria;o__Cellvibrionales;f__Halieaceae;g__unclassified_f__Halieaceae;s__unclassified_f__Halieaceae
OTU115	0	0	0	0	1	0	0	0	1	1	1	d__Bacteria;k__norank;p__Proteobacteria;c__Deltaproteobacteria;o__NB1-j;f__norank_o__NB1-j;g__norank_o__NB1-j;s__unclassified_g__norank_o__NB1-j
OTU116	1	1	1	0	1	1	1	0	1	1	1	d__Bacteria;k__norank;p__Cyanobacteria;c__Cyanobacteria;o__norank_c__Cyanobacteria;f__norank_c__Cyanobacteria;g__norank_c__Cyanobacteria;s__Phalacroma_mitra
OTU117	1	1	1	1	1	1	1	1	1	1	1	d__Bacteria;k__norank;p__Proteobacteria;c__Alphaproteobacteria;o__Rhodobacterales;f__Rhodobacteraceae;g__norank_f__Rhodobacteraceae;s__unidentified_marine_bacterioplankton_g__norank_f__Rhodobacteraceae
OTU118	1	0	0	0	1	0	0	1	1	1	1	d__Bacteria;k__norank;p__Proteobacteria;c__Alphaproteobacteria;o__Parvularculales;f__Parvularculaceae;g__norank_f__Parvularculaceae;s__uncultured_Parvularcula_sp.
OTU119	1	1	1	0	1	1	1	1	1	1	1	d__Bacteria;k__norank;p__Proteobacteria;c__Alphaproteobacteria;o__Rickettsiales;f__SAR116_clade;g__norank_f__SAR116_clade;s__marine_metagenome_g__norank_f__SAR116_clade
OTU120	1	1	1	0	1	1	1	0	1	1	1	d__Bacteria;k__norank;p__Proteobacteria;c__Alphaproteobacteria;o__Rhizobiales;f__PS1_clade;g__norank_f__PS1_clade;s__unclassified_g__norank_f__PS1_clade
OTU121	0	0	0	0	1	0	0	0	1	0	1	d__Bacteria;k__norank;p__Proteobacteria;c__Deltaproteobacteria;o__Bdellovibrionales;f__Bdellovibrionaceae;g__Bdellovibrio;s__unclassified_g__Bdellovibrio
OTU122	1	0	0	1	1	0	1	1	1	1	1	d__Bacteria;k__norank;p__Proteobacteria;c__Alphaproteobacteria;o__Caulobacterales;f__Hyphomonadaceae;g__Maricaulis;s__uncultured_bacterium_g__Maricaulis
OTU123	0	0	0	0	0	0	0	0	1	1	1	d__Bacteria;k__norank;p__Proteobacteria;c__Deltaproteobacteria;o__Bdellovibrionales;f__Bacteriovoracaceae;g__unclassified_f__Bacteriovoracaceae;s__unclassified_f__Bacteriovoracaceae
OTU124	0	1	0	1	0	0	0	1	1	0	0	d__Bacteria;k__norank;p__Proteobacteria;c__Alphaproteobacteria;o__Caulobacterales;f__Caulobacteraceae;g__Brevundimonas;s__Brevundimonas_nasdae
OTU125	1	0	0	1	1	0	0	0	1	1	1	d__Bacteria;k__norank;p__Proteobacteria;c__Alphaproteobacteria;o__Rhizobiales;f__Rhodobiaceae;g__norank_f__Rhodobiaceae;s__alpha_proteobacterium_Mf_1.05b.01
OTU126	1	0	0	0	0	0	0	0	1	1	0	d__Bacteria;k__norank;p__Proteobacteria;c__Gammaproteobacteria;o__Legionellales;f__Coxiellaceae;g__Coxiella;s__uncultured_Legionellales_bacterium_g__Coxiella
OTU127	1	0	0	0	1	0	0	0	1	1	1	d__Bacteria;k__norank;p__Proteobacteria;c__Alphaproteobacteria;o__Rhodospirillales;f__Rhodospirillaceae;g__norank_f__Rhodospirillaceae;s__uncultured_marine_microorganism_g__norank_f__Rhodospirillaceae
OTU128	1	0	0	0	1	0	0	0	1	1	1	d__Bacteria;k__norank;p__Planctomycetes;c__OM190;o__norank_c__OM190;f__norank_c__OM190;g__norank_c__OM190;s__unclassified_g__norank_c__OM190
OTU129	0	1	0	0	1	1	0	0	1	1	1	d__Bacteria;k__norank;p__Proteobacteria;c__Deltaproteobacteria;o__Bdellovibrionales;f__Bdellovibrionaceae;g__OM27_clade;s__unidentified_marine_bacterioplankton_g__OM27_clade
OTU130	1	1	1	0	1	0	1	0	1	1	1	d__Bacteria;k__norank;p__Proteobacteria;c__Gammaproteobacteria;o__Vibrionales;f__Vibrionaceae;g__Vibrio;s__unclassified_g__Vibrio
OTU131	1	0	0	0	1	0	0	0	1	1	1	d__Bacteria;k__norank;p__Proteobacteria;c__Gammaproteobacteria;o__Oceanospirillales;f__OM182_clade;g__norank_f__OM182_clade;s__uncultured_organism_g__norank_f__OM182_clade
OTU132	1	0	0	0	1	0	0	0	1	1	0	d__Bacteria;k__norank;p__Proteobacteria;c__Deltaproteobacteria;o__Bdellovibrionales;f__Bdellovibrionaceae;g__OM27_clade;s__unclassified_g__OM27_clade
OTU133	1	0	0	0	1	0	0	1	1	1	1	d__Bacteria;k__norank;p__Proteobacteria;c__Gammaproteobacteria;o__unclassified_c__Gammaproteobacteria;f__unclassified_c__Gammaproteobacteria;g__unclassified_c__Gammaproteobacteria;s__unclassified_c__Gammaproteobacteria
OTU134	1	0	1	0	1	0	1	1	1	1	1	d__Bacteria;k__norank;p__Proteobacteria;c__Gammaproteobacteria;o__Legionellales;f__Coxiellaceae;g__Coxiella;s__uncultured_bacterium_g__Coxiella
OTU135	0	0	0	0	1	0	0	0	1	1	1	d__Bacteria;k__norank;p__Proteobacteria;c__Deltaproteobacteria;o__Bdellovibrionales;f__Bdellovibrionaceae;g__Bdellovibrio;s__unclassified_g__Bdellovibrio
OTU136	0	1	0	1	1	1	1	1	1	1	1	d__Bacteria;k__norank;p__Proteobacteria;c__Alphaproteobacteria;o__Sphingomonadales;f__Sphingomonadaceae;g__Sphingobium;s__Sphingobium_lactosutens_DS20
OTU137	0	0	0	0	0	0	0	0	1	0	1	d__Bacteria;k__norank;p__Proteobacteria;c__Deltaproteobacteria;o__Bdellovibrionales;f__Bdellovibrionaceae;g__Bdellovibrio;s__unclassified_g__Bdellovibrio
OTU138	1	0	0	0	1	0	0	0	1	0	1	d__Bacteria;k__norank;p__Cyanobacteria;c__Cyanobacteria;o__SubsectionIII;f__FamilyI_o__SubsectionIII;g__Trichodesmium;s__Trichodesmium_erythraeum_IMS101
OTU139	0	0	0	0	0	0	0	0	1	1	0	d__Bacteria;k__norank;p__Cyanobacteria;c__Cyanobacteria;o__norank_c__Cyanobacteria;f__norank_c__Cyanobacteria;g__norank_c__Cyanobacteria;s__uncultured_marine_rappemonad
OTU140	0	1	0	0	1	1	0	0	1	1	1	d__Bacteria;k__norank;p__Proteobacteria;c__Deltaproteobacteria;o__Bdellovibrionales;f__Bdellovibrionaceae;g__OM27_clade;s__uncultured_delta_proteobacterium_g__OM27_clade
OTU141	0	1	0	0	1	0	0	0	1	1	1	d__Bacteria;k__norank;p__Proteobacteria;c__Gammaproteobacteria;o__Legionellales;f__Coxiellaceae;g__Coxiella;s__unclassified_g__Coxiella
OTU142	1	1	0	0	1	1	1	0	1	1	1	d__Bacteria;k__norank;p__Cyanobacteria;c__Cyanobacteria;o__norank_c__Cyanobacteria;f__norank_c__Cyanobacteria;g__norank_c__Cyanobacteria;s__unclassified_g__norank_c__Cyanobacteria
OTU143	1	1	0	0	1	0	0	0	1	1	1	d__Bacteria;k__norank;p__Cyanobacteria;c__Cyanobacteria;o__norank_c__Cyanobacteria;f__norank_c__Cyanobacteria;g__norank_c__Cyanobacteria;s__uncultured_marine_eukaryote
OTU144	0	0	0	0	1	0	0	0	1	1	1	d__Bacteria;k__norank;p__Proteobacteria;c__Deltaproteobacteria;o__Myxococcales;f__P3OB-42;g__norank_f__P3OB-42;s__uncultured_marine_microorganism_g__norank_f__P3OB-42
OTU145	0	0	0	0	0	0	0	0	1	0	1	d__Bacteria;k__norank;p__Proteobacteria;c__Alphaproteobacteria;o__Rickettsiales;f__Mitochondria;g__norank_f__Mitochondria;s__unclassified_g__norank_f__Mitochondria
OTU146	1	1	0	0	1	0	0	0	1	1	1	d__Bacteria;k__norank;p__Proteobacteria;c__Alphaproteobacteria;o__Rickettsiales;f__S25-593;g__norank_f__S25-593;s__uncultured_bacterium_g__norank_f__S25-593
OTU147	1	1	1	0	1	0	0	0	1	1	1	d__Bacteria;k__norank;p__Proteobacteria;c__Gammaproteobacteria;o__KI89A_clade;f__norank_o__KI89A_clade;g__norank_o__KI89A_clade;s__uncultured_marine_microorganism_g__norank_o__KI89A_clade
OTU148	0	0	0	0	1	0	0	0	1	1	1	d__Bacteria;k__norank;p__Bacteroidetes;c__Bacteroidetes_Incertae_Sedis;o__Order_II;f__Rhodothermaceae;g__norank_f__Rhodothermaceae;s__unclassified_g__norank_f__Rhodothermaceae
OTU149	1	0	0	1	1	1	1	1	1	1	1	d__Bacteria;k__norank;p__Proteobacteria;c__Gammaproteobacteria;o__Oceanospirillales;f__Alcanivoracaceae;g__Alcanivorax;s__unclassified_g__Alcanivorax
OTU150	1	0	0	0	1	0	0	0	1	1	1	d__Bacteria;k__norank;p__SBR1093;c__norank_p__SBR1093;o__norank_p__SBR1093;f__norank_p__SBR1093;g__norank_p__SBR1093;s__uncultured_candidate_division_SBR1093_bacterium
OTU151	1	1	0	0	1	0	1	0	1	1	1	d__Bacteria;k__norank;p__Proteobacteria;c__Gammaproteobacteria;o__Cellvibrionales;f__Porticoccaceae;g__SAR92_clade;s__unclassified_g__SAR92_clade
OTU152	1	1	1	1	1	1	1	1	1	1	1	d__Bacteria;k__norank;p__Actinobacteria;c__Actinobacteria;o__Acidimicrobiales;f__OM1_clade;g__Candidatus_Actinomarina;s__unidentified_marine_bacterioplankton_g__Candidatus_Actinomarina
OTU153	0	0	0	0	0	0	0	0	1	1	1	d__Bacteria;k__norank;p__Proteobacteria;c__Epsilonproteobacteria;o__BG.g7;f__norank_o__BG.g7;g__norank_o__BG.g7;s__uncultured_Arcobacter_sp._g__norank
OTU154	1	1	1	1	1	1	1	0	1	1	1	d__Bacteria;k__norank;p__Bacteroidetes;c__Flavobacteriia;o__Flavobacteriales;f__Flavobacteriaceae;g__NS5_marine_group;s__unclassified_g__NS5_marine_group
OTU155	0	0	0	0	0	0	0	1	1	1	0	d__Bacteria;k__norank;p__Proteobacteria;c__Gammaproteobacteria;o__unclassified_c__Gammaproteobacteria;f__unclassified_c__Gammaproteobacteria;g__unclassified_c__Gammaproteobacteria;s__unclassified_c__Gammaproteobacteria
OTU156	0	0	0	0	1	1	0	0	1	1	0	d__Bacteria;k__norank;p__Planctomycetes;c__Pla3_lineage;o__norank_c__Pla3_lineage;f__norank_c__Pla3_lineage;g__norank_c__Pla3_lineage;s__uncultured_Planctomycetaceae_bacterium_g__norank_c__Pla3_lineage
OTU157	0	0	0	0	1	0	0	0	1	1	1	d__Bacteria;k__norank;p__Actinobacteria;c__Actinobacteria;o__Acidimicrobiales;f__Sva0996_marine_group;g__norank_f__Sva0996_marine_group;s__unclassified_g__norank_f__Sva0996_marine_group
OTU158	1	1	1	0	1	1	1	0	1	1	1	d__Bacteria;k__norank;p__Proteobacteria;c__Gammaproteobacteria;o__Cellvibrionales;f__Halieaceae;g__OM60_NOR5__clade;s__uncultured_bacterium_g__OM60_NOR5__clade
OTU159	1	1	1	0	1	1	1	1	1	1	1	d__Bacteria;k__norank;p__Proteobacteria;c__Gammaproteobacteria;o__Vibrionales;f__Vibrionaceae;g__norank_f__Vibrionaceae;s__unclassified_g__norank_f__Vibrionaceae
OTU160	1	0	0	0	1	0	1	0	1	1	1	d__Bacteria;k__norank;p__Proteobacteria;c__Gammaproteobacteria;o__Cellvibrionales;f__Halieaceae;g__OM60_NOR5__clade;s__uncultured_Haliea_sp._g__OM60_NOR5__clade
OTU161	1	1	0	0	1	1	0	0	1	1	1	d__Bacteria;k__norank;p__Proteobacteria;c__Gammaproteobacteria;o__KI89A_clade;f__norank_o__KI89A_clade;g__norank_o__KI89A_clade;s__uncultured_bacterium_g__norank_o__KI89A_clade
OTU162	1	0	0	0	1	0	0	0	1	1	1	d__Bacteria;k__norank;p__Bacteroidetes;c__Flavobacteriia;o__Flavobacteriales;f__Flavobacteriaceae;g__norank_f__Flavobacteriaceae;s__uncultured_Bacteroidetes_bacterium_g__norank_f__Flavobacteriaceae
OTU163	1	0	0	0	1	0	0	0	0	1	1	d__Bacteria;k__norank;p__Proteobacteria;c__Alphaproteobacteria;o__Rickettsiales;f__Rickettsiaceae;g__norank_f__Rickettsiaceae;s__uncultured_bacterium_g__norank_f__Rickettsiaceae
OTU164	1	1	0	0	1	1	0	0	1	1	1	d__Bacteria;k__norank;p__Bacteroidetes;c__Flavobacteriia;o__Flavobacteriales;f__Flavobacteriaceae;g__NS5_marine_group;s__unclassified_g__NS5_marine_group
OTU165	0	0	0	0	1	1	0	0	1	1	1	d__Bacteria;k__norank;p__Proteobacteria;c__unclassified_p__Proteobacteria;o__unclassified_p__Proteobacteria;f__unclassified_p__Proteobacteria;g__unclassified_p__Proteobacteria;s__unclassified_p__Proteobacteria
OTU166	0	0	0	0	0	0	0	0	1	1	1	d__Bacteria;k__norank;p__Verrucomicrobia;c__Verrucomicrobiae;o__Verrucomicrobiales;f__unclassified_o__Verrucomicrobiales;g__unclassified_o__Verrucomicrobiales;s__unclassified_o__Verrucomicrobiales
OTU167	0	0	0	0	1	1	1	1	1	1	1	d__Bacteria;k__norank;p__Bacteroidetes;c__Flavobacteriia;o__Flavobacteriales;f__Flavobacteriaceae;g__Pseudofulvibacter;s__unclassified_g__Pseudofulvibacter
OTU168	1	0	0	0	1	0	0	0	1	1	0	d__Bacteria;k__norank;p__Proteobacteria;c__Gammaproteobacteria;o__Oceanospirillales;f__Oceanospirillaceae;g__Marinobacterium;s__uncultured_bacterium_g__Marinobacterium
OTU169	0	1	0	0	1	1	0	0	1	1	1	d__Bacteria;k__norank;p__Proteobacteria;c__Deltaproteobacteria;o__Bdellovibrionales;f__Bdellovibrionaceae;g__OM27_clade;s__uncultured_delta_proteobacterium_g__OM27_clade
OTU170	0	0	0	0	1	0	0	0	1	1	1	d__Bacteria;k__norank;p__Proteobacteria;c__Deltaproteobacteria;o__Bdellovibrionales;f__Bacteriovoracaceae;g__Peredibacter;s__uncultured_Bacteriovorax_sp._g__Peredibacter
OTU171	0	0	0	0	0	0	0	0	1	1	1	d__Bacteria;k__norank;p__Proteobacteria;c__pItb-vmat-80;o__norank_c__pItb-vmat-80;f__norank_c__pItb-vmat-80;g__norank_c__pItb-vmat-80;s__uncultured_bacterium_g__norank_c__pItb-vmat-80
OTU172	1	0	0	0	1	0	0	0	1	1	0	d__Bacteria;k__norank;p__Proteobacteria;c__Deltaproteobacteria;o__Myxococcales;f__Nannocystaceae;g__norank_f__Nannocystaceae;s__uncultured_Myxococcales_bacterium_g__norank_f__Nannocystaceae
OTU173	0	0	0	0	0	0	0	0	1	1	1	d__Bacteria;k__norank;p__Proteobacteria;c__Deltaproteobacteria;o__Oligoflexales;f__Oligoflexaceae;g__norank_f__Oligoflexaceae;s__unclassified_g__norank_f__Oligoflexaceae
OTU174	1	1	0	1	1	1	0	0	1	1	1	d__Bacteria;k__norank;p__Proteobacteria;c__Deltaproteobacteria;o__Bdellovibrionales;f__Bdellovibrionaceae;g__OM27_clade;s__uncultured_marine_microorganism_g__OM27_clade
OTU175	1	1	1	0	1	1	1	1	1	1	1	d__Bacteria;k__norank;p__Proteobacteria;c__Deltaproteobacteria;o__Bradymonadales;f__norank_o__Bradymonadales;g__norank_o__Bradymonadales;s__uncultured_delta_proteobacterium_g__norank_o__Bradymonadales
OTU176	1	0	0	0	1	1	0	0	1	1	1	d__Bacteria;k__norank;p__Planctomycetes;c__Phycisphaerae;o__Phycisphaerales;f__Phycisphaeraceae;g__CL500-3;s__uncultured_Phycisphaeraceae_bacterium_g__CL500-3
OTU177	1	0	0	0	1	0	0	0	1	1	1	d__Bacteria;k__norank;p__Proteobacteria;c__Deltaproteobacteria;o__Bdellovibrionales;f__Bacteriovoracaceae;g__Halobacteriovorax;s__unclassified_g__Halobacteriovorax
OTU178	1	0	0	0	1	1	0	0	1	1	1	d__Bacteria;k__norank;p__Actinobacteria;c__Actinobacteria;o__Acidimicrobiales;f__OM1_clade;g__Candidatus_Actinomarina;s__unclassified_g__Candidatus_Actinomarina
OTU179	0	0	0	0	1	0	0	0	1	1	1	d__Bacteria;k__norank;p__Proteobacteria;c__Deltaproteobacteria;o__Bdellovibrionales;f__Bdellovibrionaceae;g__Bdellovibrio;s__uncultured_delta_proteobacterium_g__Bdellovibrio
OTU180	1	0	0	0	1	0	0	0	1	1	1	d__Bacteria;k__norank;p__Proteobacteria;c__Deltaproteobacteria;o__Bradymonadales;f__norank_o__Bradymonadales;g__norank_o__Bradymonadales;s__uncultured_marine_microorganism_g__norank_o__Bradymonadales
OTU181	1	0	0	0	0	0	0	0	0	1	0	d__Bacteria;k__norank;p__Bacteroidetes;c__Cytophagia;o__Cytophagales;f__Flammeovirgaceae;g__norank_f__Flammeovirgaceae;s__unclassified_g__norank_f__Flammeovirgaceae
OTU182	1	1	0	0	1	1	1	0	1	1	1	d__Bacteria;k__norank;p__Actinobacteria;c__Actinobacteria;o__PeM15;f__norank_o__PeM15;g__norank_o__PeM15;s__unclassified_g__norank_o__PeM15
OTU183	1	0	0	0	1	0	0	0	1	1	1	d__Bacteria;k__norank;p__Proteobacteria;c__Deltaproteobacteria;o__Bradymonadales;f__norank_o__Bradymonadales;g__norank_o__Bradymonadales;s__unclassified_g__norank_o__Bradymonadales
OTU184	1	0	0	0	1	0	1	1	1	1	0	d__Bacteria;k__norank;p__Proteobacteria;c__Deltaproteobacteria;o__Bdellovibrionales;f__Bdellovibrionaceae;g__OM27_clade;s__uncultured_bacterium_g__OM27_clade
OTU185	1	0	0	0	1	0	0	1	1	1	1	d__Bacteria;k__norank;p__Cyanobacteria;c__Cyanobacteria;o__norank_c__Cyanobacteria;f__norank_c__Cyanobacteria;g__norank_c__Cyanobacteria;s__unclassified_g__norank_c__Cyanobacteria
OTU186	0	0	0	0	0	0	0	0	0	1	0	d__Bacteria;k__norank;p__Bacteroidetes;c__Cytophagia;o__Cytophagales;f__Flammeovirgaceae;g__Fabibacter;s__unclassified_g__Fabibacter
OTU187	0	0	0	0	1	0	0	0	1	1	1	d__Bacteria;k__norank;p__Proteobacteria;c__Deltaproteobacteria;o__Bdellovibrionales;f__Bacteriovoracaceae;g__Peredibacter;s__unclassified_g__Peredibacter
OTU188	0	0	0	0	0	0	0	0	1	1	1	d__Bacteria;k__norank;p__Actinobacteria;c__Actinobacteria;o__Acidimicrobiales;f__Sva0996_marine_group;g__norank_f__Sva0996_marine_group;s__unclassified_g__norank_f__Sva0996_marine_group
OTU189	0	0	0	0	1	0	0	0	1	1	0	d__Bacteria;k__norank;p__TM6__Dependentiae_;c__norank_p__TM6__Dependentiae_;o__norank_p__TM6__Dependentiae_;f__norank_p__TM6__Dependentiae_;g__norank_p__TM6__Dependentiae_;s__uncultured_bacterium_g__norank_p__TM6__Dependentiae_
OTU190	1	1	0	0	1	1	0	0	1	1	1	d__Bacteria;k__norank;p__Cyanobacteria;c__Cyanobacteria;o__norank_c__Cyanobacteria;f__norank_c__Cyanobacteria;g__norank_c__Cyanobacteria;s__uncultured_bacterium_g__norank_c__Cyanobacteria
OTU191	1	0	0	0	0	0	0	0	1	1	1	d__Bacteria;k__norank;p__Proteobacteria;c__Gammaproteobacteria;o__Legionellales;f__Coxiellaceae;g__Coxiella;s__uncultured_gamma_proteobacterium_KTc0924
OTU192	1	0	0	0	1	1	0	0	1	1	1	d__Bacteria;k__norank;p__Cyanobacteria;c__Cyanobacteria;o__norank_c__Cyanobacteria;f__norank_c__Cyanobacteria;g__norank_c__Cyanobacteria;s__unclassified_g__norank_c__Cyanobacteria
OTU193	1	0	0	0	1	0	0	1	1	1	1	d__Bacteria;k__norank;p__Bacteroidetes;c__Flavobacteriia;o__Flavobacteriales;f__NS9_marine_group;g__norank_f__NS9_marine_group;s__unidentified_marine_bacterioplankton_g__norank_f__NS9_marine_group
OTU194	1	1	0	0	1	1	0	1	1	1	1	d__Bacteria;k__norank;p__Planctomycetes;c__Phycisphaerae;o__Phycisphaerales;f__Phycisphaeraceae;g__Urania-1B-19_marine_sediment_group;s__uncultured_bacterium_g__Urania-1B-19_marine_sediment_group
OTU195	1	1	1	0	1	1	0	1	1	1	1	d__Bacteria;k__norank;p__Proteobacteria;c__Deltaproteobacteria;o__Bradymonadales;f__norank_o__Bradymonadales;g__norank_o__Bradymonadales;s__unclassified_g__norank_o__Bradymonadales
OTU196	0	0	0	0	0	0	0	0	1	1	1	d__Bacteria;k__norank;p__Proteobacteria;c__Gammaproteobacteria;o__Legionellales;f__unclassified_o__Legionellales;g__unclassified_o__Legionellales;s__unclassified_o__Legionellales
OTU197	1	0	0	0	1	0	0	1	1	1	1	d__Bacteria;k__norank;p__Planctomycetes;c__OM190;o__norank_c__OM190;f__norank_c__OM190;g__norank_c__OM190;s__unclassified_g__norank_c__OM190
OTU198	1	0	0	0	1	0	0	0	1	1	1	d__Bacteria;k__norank;p__Cyanobacteria;c__Cyanobacteria;o__norank_c__Cyanobacteria;f__norank_c__Cyanobacteria;g__norank_c__Cyanobacteria;s__unidentified_marine_bacterioplankton_g__norank_c__Cyanobacteria
OTU199	1	1	1	0	1	1	1	1	1	1	1	d__Bacteria;k__norank;p__Cyanobacteria;c__Cyanobacteria;o__norank_c__Cyanobacteria;f__norank_c__Cyanobacteria;g__norank_c__Cyanobacteria;s__unclassified_g__norank_c__Cyanobacteria
OTU200	1	1	0	0	1	1	0	0	1	1	1	d__Bacteria;k__norank;p__Proteobacteria;c__Gammaproteobacteria;o__Gammaproteobacteria_Incertae_Sedis;f__Unknown_Family_o__Gammaproteobacteria_Incertae_Sedis;g__norank_f__Unknown_Family_o__Gammaproteobacteria_Incertae_Sedis;s__uncultured_marine_bacterium_g__norank_f__Unknown_Family_o__Gammaproteobacteria_Incertae_Sedis
OTU201	1	1	1	0	1	1	0	0	0	1	1	d__Bacteria;k__norank;p__Proteobacteria;c__Deltaproteobacteria;o__Bdellovibrionales;f__Bdellovibrionaceae;g__OM27_clade;s__unclassified_g__OM27_clade
OTU202	1	1	0	0	0	1	0	0	1	1	1	d__Bacteria;k__norank;p__Proteobacteria;c__Gammaproteobacteria;o__Legionellales;f__Coxiellaceae;g__Coxiella;s__uncultured_bacterium_g__Coxiella
OTU203	1	1	1	0	1	1	0	0	1	1	1	d__Bacteria;k__norank;p__Marinimicrobia__SAR406_clade_;c__norank_p__Marinimicrobia__SAR406_clade_;o__norank_p__Marinimicrobia__SAR406_clade_;f__norank_p__Marinimicrobia__SAR406_clade_;g__norank_p__Marinimicrobia__SAR406_clade_;s__unclassified_g__norank_p__Marinimicrobia__SAR406_clade_
OTU204	1	1	1	0	1	1	0	0	1	1	1	d__Bacteria;k__norank;p__Proteobacteria;c__Gammaproteobacteria;o__Legionellales;f__Coxiellaceae;g__Coxiella;s__uncultured_bacterium_g__Coxiella
OTU205	0	0	0	0	1	0	0	0	0	1	0	d__Bacteria;k__norank;p__Proteobacteria;c__Gammaproteobacteria;o__unclassified_c__Gammaproteobacteria;f__unclassified_c__Gammaproteobacteria;g__unclassified_c__Gammaproteobacteria;s__unclassified_c__Gammaproteobacteria
OTU206	1	1	0	0	1	1	1	0	1	1	1	d__Bacteria;k__norank;p__Planctomycetes;c__Phycisphaerae;o__Phycisphaerales;f__Phycisphaeraceae;g__CL500-3;s__uncultured_Phycisphaeraceae_bacterium_g__CL500-3
OTU207	1	1	0	0	1	1	1	0	1	1	1	d__Bacteria;k__norank;p__Marinimicrobia__SAR406_clade_;c__norank_p__Marinimicrobia__SAR406_clade_;o__norank_p__Marinimicrobia__SAR406_clade_;f__norank_p__Marinimicrobia__SAR406_clade_;g__norank_p__Marinimicrobia__SAR406_clade_;s__unidentified_marine_bacterioplankton_g__norank_p__Marinimicrobia__SAR406_clade_
OTU208	1	0	0	0	1	0	0	0	1	1	1	d__Bacteria;k__norank;p__Proteobacteria;c__Deltaproteobacteria;o__Bdellovibrionales;f__Bacteriovoracaceae;g__unclassified_f__Bacteriovoracaceae;s__unclassified_f__Bacteriovoracaceae
OTU209	1	0	0	0	1	0	0	0	1	1	1	d__Bacteria;k__norank;p__Cyanobacteria;c__Cyanobacteria;o__norank_c__Cyanobacteria;f__norank_c__Cyanobacteria;g__norank_c__Cyanobacteria;s__uncultured_bacterium_g__norank_c__Cyanobacteria
OTU210	1	0	0	0	1	0	0	0	1	1	1	d__Bacteria;k__norank;p__Proteobacteria;c__Deltaproteobacteria;o__Bdellovibrionales;f__Bacteriovoracaceae;g__Peredibacter;s__unclassified_g__Peredibacter
OTU211	1	1	0	0	1	0	0	0	1	1	1	d__Bacteria;k__norank;p__Bacteroidetes;c__Bacteroidetes_Incertae_Sedis;o__Order_III;f__Unknown_Family_o__Order_III;g__Balneola;s__uncultured_bacterium_g__Balneola
OTU212	1	0	0	0	1	0	0	0	1	1	0	d__Bacteria;k__norank;p__Bacteroidetes;c__unclassified_p__Bacteroidetes;o__unclassified_p__Bacteroidetes;f__unclassified_p__Bacteroidetes;g__unclassified_p__Bacteroidetes;s__unclassified_p__Bacteroidetes
OTU213	1	0	0	0	1	0	0	0	1	1	1	d__Bacteria;k__norank;p__Proteobacteria;c__Deltaproteobacteria;o__Desulfurellales;f__Desulfurellaceae;g__H16;s__unclassified_g__H16
OTU214	1	1	0	0	1	1	0	0	1	1	1	d__Bacteria;k__norank;p__Proteobacteria;c__Gammaproteobacteria;o__Legionellales;f__Coxiellaceae;g__Coxiella;s__uncultured_bacterium_g__Coxiella
OTU215	1	1	0	0	1	1	1	0	1	1	1	d__Bacteria;k__norank;p__Chloroflexi;c__SAR202_clade;o__norank_c__SAR202_clade;f__norank_c__SAR202_clade;g__norank_c__SAR202_clade;s__marine_metagenome_g__norank_c__SAR202_clade
OTU216	1	1	1	0	1	1	1	0	1	1	1	d__Bacteria;k__norank;p__Actinobacteria;c__Actinobacteria;o__Acidimicrobiales;f__Sva0996_marine_group;g__norank_f__Sva0996_marine_group;s__uncultured_Verrucomicrobiales_bacterium_HF0070_30L02
OTU217	1	0	1	0	1	0	1	0	1	1	1	d__Bacteria;k__norank;p__Chlamydiae;c__Chlamydiae;o__Chlamydiales;f__Simkaniaceae;g__unclassified_f__Simkaniaceae;s__unclassified_f__Simkaniaceae
OTU218	1	1	1	0	1	1	1	1	1	1	1	d__Bacteria;k__norank;p__Proteobacteria;c__Gammaproteobacteria;o__Oceanospirillales;f__SAR86_clade;g__norank_f__SAR86_clade;s__unclassified_g__norank_f__SAR86_clade
OTU219	1	1	0	0	1	1	1	0	1	1	1	d__Bacteria;k__norank;p__Proteobacteria;c__Deltaproteobacteria;o__SAR324_clade_Marine_group_B_;f__norank_o__SAR324_clade_Marine_group_B_;g__norank_o__SAR324_clade_Marine_group_B_;s__SAR324_cluster_bacterium_JCVI-SC_AAA005
OTU220	1	0	0	0	1	0	0	0	1	1	1	d__Bacteria;k__norank;p__Proteobacteria;c__Deltaproteobacteria;o__Bdellovibrionales;f__Bacteriovoracaceae;g__Peredibacter;s__uncultured_delta_proteobacterium_g__Peredibacter
OTU221	1	0	0	0	0	0	0	0	1	1	1	d__Bacteria;k__norank;p__Proteobacteria;c__Betaproteobacteria;o__Hydrogenophilales;f__Hydrogenophilaceae;g__norank_f__Hydrogenophilaceae;s__uncultured_marine_microorganism_g__norank_f__Hydrogenophilaceae
OTU222	1	1	1	0	1	1	1	0	1	1	1	d__Bacteria;k__norank;p__Proteobacteria;c__Alphaproteobacteria;o__Rhodobacterales;f__Rhodobacteraceae;g__norank_f__Rhodobacteraceae;s__unidentified_marine_bacterioplankton_g__norank_f__Rhodobacteraceae
OTU223	0	0	0	0	1	0	0	0	1	1	1	d__Bacteria;k__norank;p__Bacteroidetes;c__Sphingobacteriia;o__Sphingobacteriales;f__Saprospiraceae;g__Aureispira;s__uncultured_bacterium_g__Aureispira
OTU224	1	1	0	0	1	1	0	0	1	1	1	d__Bacteria;k__norank;p__Proteobacteria;c__Deltaproteobacteria;o__Myxococcales;f__P3OB-42;g__norank_f__P3OB-42;s__uncultured_bacterium_g__norank_f__P3OB-42
OTU225	1	1	1	0	1	1	1	1	1	1	1	d__Bacteria;k__norank;p__Bacteroidetes;c__Flavobacteriia;o__Flavobacteriales;f__Flavobacteriaceae;g__NS2b_marine_group;s__uncultured_Flavobacteriales_bacterium_g__NS2b_marine_group
OTU226	1	1	0	0	1	1	1	0	1	1	1	d__Bacteria;k__norank;p__Proteobacteria;c__Alphaproteobacteria;o__Rhodospirillales;f__Rhodospirillaceae;g__norank_f__Rhodospirillaceae;s__uncultured_bacterium_g__norank_f__Rhodospirillaceae
OTU227	1	1	0	0	1	1	0	0	1	1	1	d__Bacteria;k__norank;p__Proteobacteria;c__Alphaproteobacteria;o__Rhodospirillales;f__Rhodospirillaceae;g__norank_f__Rhodospirillaceae;s__unclassified_g__norank_f__Rhodospirillaceae
OTU228	1	1	0	0	1	1	1	1	1	1	1	d__Bacteria;k__norank;p__Bacteroidetes;c__Flavobacteriia;o__Flavobacteriales;f__NS9_marine_group;g__norank_f__NS9_marine_group;s__hydrothermal_vent_metagenome_g__norank_f__NS9_marine_group
OTU229	1	0	0	0	1	0	0	0	1	1	1	d__Bacteria;k__norank;p__Proteobacteria;c__Gammaproteobacteria;o__Oceanospirillales;f__OM182_clade;g__norank_f__OM182_clade;s__unclassified_g__norank_f__OM182_clade
OTU230	1	0	0	0	1	0	0	0	1	1	1	d__Bacteria;k__norank;p__Proteobacteria;c__Alphaproteobacteria;o__Rhizobiales;f__OCS116_clade;g__norank_f__OCS116_clade;s__uncultured_Rhizobiales_bacterium_g__norank_f__OCS116_clade
OTU231	0	0	0	0	0	0	0	0	1	0	1	d__Bacteria;k__norank;p__Proteobacteria;c__unclassified_p__Proteobacteria;o__unclassified_p__Proteobacteria;f__unclassified_p__Proteobacteria;g__unclassified_p__Proteobacteria;s__unclassified_p__Proteobacteria
OTU232	1	0	0	0	1	0	0	0	1	1	1	d__Bacteria;k__norank;p__Proteobacteria;c__Deltaproteobacteria;o__Bdellovibrionales;f__Bdellovibrionaceae;g__OM27_clade;s__uncultured_marine_microorganism_g__OM27_clade
OTU233	1	0	0	0	1	0	0	1	1	1	1	d__Bacteria;k__norank;p__Proteobacteria;c__Deltaproteobacteria;o__Bdellovibrionales;f__Bdellovibrionaceae;g__OM27_clade;s__uncultured_delta_proteobacterium_g__OM27_clade
OTU234	1	0	0	0	1	0	0	0	1	1	1	d__Bacteria;k__norank;p__Bacteroidetes;c__Flavobacteriia;o__Flavobacteriales;f__Cryomorphaceae;g__norank_f__Cryomorphaceae;s__unclassified_g__norank_f__Cryomorphaceae
OTU235	1	1	0	0	1	0	0	0	1	1	1	d__Bacteria;k__norank;p__Verrucomicrobia;c__R76-B128;o__norank_c__R76-B128;f__norank_c__R76-B128;g__norank_c__R76-B128;s__uncultured_bacterium_g__norank_c__R76-B128
OTU236	1	0	0	0	1	0	0	0	1	1	1	d__Bacteria;k__norank;p__Verrucomicrobia;c__Verrucomicrobiae;o__Verrucomicrobiales;f__DEV007;g__norank_f__DEV007;s__unclassified_g__norank_f__DEV007
OTU237	0	0	0	0	1	0	0	0	1	1	1	d__Bacteria;k__norank;p__Marinimicrobia__SAR406_clade_;c__norank_p__Marinimicrobia__SAR406_clade_;o__norank_p__Marinimicrobia__SAR406_clade_;f__norank_p__Marinimicrobia__SAR406_clade_;g__norank_p__Marinimicrobia__SAR406_clade_;s__uncultured_bacterium_g__norank_p__Marinimicrobia__SAR406_clade_
OTU238	1	0	0	0	1	0	0	0	1	1	1	d__Bacteria;k__norank;p__Proteobacteria;c__Alphaproteobacteria;o__Alphaproteobacteria_Incertae_Sedis;f__unclassified_o__Alphaproteobacteria_Incertae_Sedis;g__unclassified_o__Alphaproteobacteria_Incertae_Sedis;s__unclassified_o__Alphaproteobacteria_Incertae_Sedis
OTU239	1	0	0	1	1	1	1	1	1	1	1	d__Bacteria;k__norank;p__Proteobacteria;c__Alphaproteobacteria;o__Rhodobacterales;f__Rhodobacteraceae;g__unclassified_f__Rhodobacteraceae;s__unclassified_f__Rhodobacteraceae
OTU240	1	0	0	0	1	0	0	0	1	1	1	d__Bacteria;k__norank;p__Proteobacteria;c__SPOTSOCT00m83;o__norank_c__SPOTSOCT00m83;f__norank_c__SPOTSOCT00m83;g__norank_c__SPOTSOCT00m83;s__uncultured_bacterium_g__norank_c__SPOTSOCT00m83
OTU241	1	1	0	1	1	1	1	0	1	1	1	d__Bacteria;k__norank;p__Proteobacteria;c__Alphaproteobacteria;o__Rickettsiales;f__SAR116_clade;g__norank_f__SAR116_clade;s__uncultured_Oceanibaculum_sp._g__norank_f__SAR116_clade
OTU242	1	1	1	0	1	1	1	1	1	1	1	d__Bacteria;k__norank;p__Proteobacteria;c__Alphaproteobacteria;o__Rhodobacterales;f__Rhodobacteraceae;g__norank_f__Rhodobacteraceae;s__unclassified_g__norank_f__Rhodobacteraceae
OTU243	1	1	1	0	1	1	0	0	1	1	1	d__Bacteria;k__norank;p__Bacteroidetes;c__Flavobacteriia;o__Flavobacteriales;f__Flavobacteriaceae;g__NS4_marine_group;s__uncultured_bacterium_g__NS4_marine_group
OTU244	1	0	0	1	1	0	1	1	1	1	1	d__Bacteria;k__norank;p__Proteobacteria;c__Alphaproteobacteria;o__Rhodobacterales;f__Rhodobacteraceae;g__unclassified_f__Rhodobacteraceae;s__unclassified_f__Rhodobacteraceae
OTU245	1	1	0	0	1	0	0	0	1	1	1	d__Bacteria;k__norank;p__Bacteroidetes;c__Flavobacteriia;o__Flavobacteriales;f__Flavobacteriaceae;g__Formosa;s__uncultured_Flavobacteriia_bacterium_g__Formosa
OTU246	1	1	0	0	1	0	0	0	1	1	1	d__Bacteria;k__norank;p__Proteobacteria;c__Gammaproteobacteria;o__Legionellales;f__Coxiellaceae;g__Coxiella;s__uncultured_bacterium_g__Coxiella
OTU247	1	1	1	1	1	1	0	1	1	1	1	d__Bacteria;k__norank;p__Proteobacteria;c__Alphaproteobacteria;o__Rhodospirillales;f__Rhodospirillaceae;g__OM75_clade;s__uncultured_bacterium_g__OM75_clade
OTU248	1	0	0	0	1	0	0	0	1	1	1	d__Bacteria;k__norank;p__Proteobacteria;c__Deltaproteobacteria;o__unclassified_c__Deltaproteobacteria;f__unclassified_c__Deltaproteobacteria;g__unclassified_c__Deltaproteobacteria;s__unclassified_c__Deltaproteobacteria
OTU249	1	1	1	0	1	1	1	1	1	1	1	d__Bacteria;k__norank;p__Proteobacteria;c__Alphaproteobacteria;o__Rickettsiales;f__S25-593;g__norank_f__S25-593;s__unclassified_g__norank_f__S25-593
OTU250	1	1	1	1	1	1	1	1	1	1	1	d__Bacteria;k__norank;p__Proteobacteria;c__Deltaproteobacteria;o__SAR324_clade_Marine_group_B_;f__norank_o__SAR324_clade_Marine_group_B_;g__norank_o__SAR324_clade_Marine_group_B_;s__unclassified_g__norank_o__SAR324_clade_Marine_group_B_
OTU251	1	0	0	0	1	0	0	1	1	1	1	d__Bacteria;k__norank;p__Proteobacteria;c__Alphaproteobacteria;o__Rhizobiales;f__Rhodobiaceae;g__Rhodobium;s__uncultured_bacterium_g__Rhodobium
OTU252	1	0	0	1	1	1	1	1	1	1	1	d__Bacteria;k__norank;p__Proteobacteria;c__Alphaproteobacteria;o__Caulobacterales;f__Hyphomonadaceae;g__Hyphomonas;s__unclassified_g__Hyphomonas
OTU253	1	1	0	0	1	1	0	0	1	1	1	d__Bacteria;k__norank;p__Bacteroidetes;c__Flavobacteriia;o__Flavobacteriales;f__NS9_marine_group;g__norank_f__NS9_marine_group;s__unclassified_g__norank_f__NS9_marine_group
OTU254	0	0	0	0	1	0	0	0	1	0	1	d__Bacteria;k__norank;p__Proteobacteria;c__Deltaproteobacteria;o__Bdellovibrionales;f__Bacteriovoracaceae;g__unclassified_f__Bacteriovoracaceae;s__unclassified_f__Bacteriovoracaceae
OTU255	0	0	0	0	0	0	0	0	1	1	1	d__Bacteria;k__norank;p__Proteobacteria;c__Deltaproteobacteria;o__Myxococcales;f__P3OB-42;g__norank_f__P3OB-42;s__uncultured_bacterium_g__norank_f__P3OB-42
OTU256	0	1	0	0	1	1	0	0	1	1	1	d__Bacteria;k__norank;p__PAUC34f;c__norank_p__PAUC34f;o__norank_p__PAUC34f;f__norank_p__PAUC34f;g__norank_p__PAUC34f;s__marine_metagenome_g__norank_p__PAUC34f
OTU257	1	0	1	1	0	1	1	1	1	1	1	d__Bacteria;k__norank;p__Proteobacteria;c__Alphaproteobacteria;o__Caulobacterales;f__Hyphomonadaceae;g__Henriciella;s__unclassified_g__Henriciella
OTU258	1	0	0	0	1	0	1	0	1	1	1	d__Bacteria;k__norank;p__Bacteroidetes;c__Flavobacteriia;o__Flavobacteriales;f__Flavobacteriaceae;g__Muricauda;s__uncultured_bacterium_g__Muricauda
OTU259	1	1	1	1	1	1	1	1	1	1	1	d__Bacteria;k__norank;p__Proteobacteria;c__Alphaproteobacteria;o__SAR11_clade;f__Surface_3;g__norank_f__Surface_3;s__uncultured_bacterium_g__norank_f__Surface_3
OTU260	0	0	0	0	0	0	0	0	1	1	1	d__Bacteria;k__norank;p__Proteobacteria;c__Deltaproteobacteria;o__Bdellovibrionales;f__Bacteriovoracaceae;g__Peredibacter;s__uncultured_delta_proteobacterium_g__Peredibacter
OTU261	1	0	0	0	1	0	1	0	1	1	1	d__Bacteria;k__norank;p__Bacteroidetes;c__Flavobacteriia;o__Flavobacteriales;f__Cryomorphaceae;g__Luteibaculum;s__uncultured_Bacteroidetes_bacterium_g__Luteibaculum
OTU262	1	1	1	1	1	1	1	1	1	1	1	d__Bacteria;k__norank;p__Proteobacteria;c__Alphaproteobacteria;o__SAR11_clade;f__Surface_1;g__norank_f__Surface_1;s__unclassified_g__norank_f__Surface_1
OTU263	1	1	0	0	1	0	0	0	0	1	1	d__Bacteria;k__norank;p__Cyanobacteria;c__Cyanobacteria;o__norank_c__Cyanobacteria;f__norank_c__Cyanobacteria;g__norank_c__Cyanobacteria;s__unclassified_g__norank_c__Cyanobacteria
OTU264	0	0	0	0	0	0	0	0	1	1	1	d__Bacteria;k__norank;p__Proteobacteria;c__Deltaproteobacteria;o__Bdellovibrionales;f__Bdellovibrionaceae;g__Bdellovibrio;s__uncultured_marine_bacterium_g__Bdellovibrio
OTU265	0	0	0	0	1	0	0	0	1	1	1	d__Bacteria;k__norank;p__Proteobacteria;c__Deltaproteobacteria;o__SAR324_clade_Marine_group_B_;f__norank_o__SAR324_clade_Marine_group_B_;g__norank_o__SAR324_clade_Marine_group_B_;s__unclassified_g__norank_o__SAR324_clade_Marine_group_B_
OTU266	1	1	1	1	1	1	1	0	1	1	1	d__Bacteria;k__norank;p__Proteobacteria;c__Gammaproteobacteria;o__Vibrionales;f__Vibrionaceae;g__Vibrio;s__Vibrio_neptunius
OTU267	1	1	1	1	1	1	1	1	1	1	1	d__Bacteria;k__norank;p__Actinobacteria;c__Actinobacteria;o__Propionibacteriales;f__Nocardioidaceae;g__Nocardioides;s__Nocardioides_marinus
OTU268	1	0	0	0	1	0	0	0	1	1	1	d__Bacteria;k__norank;p__Proteobacteria;c__Deltaproteobacteria;o__Bdellovibrionales;f__Bdellovibrionaceae;g__OM27_clade;s__uncultured_delta_proteobacterium_g__OM27_clade
OTU269	1	1	1	0	1	1	1	1	1	1	1	d__Bacteria;k__norank;p__Proteobacteria;c__Alphaproteobacteria;o__Rickettsiales;f__SAR116_clade;g__norank_f__SAR116_clade;s__unclassified_g__norank_f__SAR116_clade
OTU270	1	0	0	0	1	0	0	0	1	1	1	d__Bacteria;k__norank;p__Bacteroidetes;c__Flavobacteriia;o__Flavobacteriales;f__Cryomorphaceae;g__norank_f__Cryomorphaceae;s__uncultured_bacterium_g__norank_f__Cryomorphaceae
OTU271	1	0	0	0	1	0	0	0	1	1	1	d__Bacteria;k__norank;p__Proteobacteria;c__Alphaproteobacteria;o__SAR11_clade;f__norank_o__SAR11_clade;g__norank_o__SAR11_clade;s__alpha_proteobacterium_HIMB114
OTU272	1	1	0	0	1	1	1	0	1	1	1	d__Bacteria;k__norank;p__Bacteroidetes;c__Flavobacteriia;o__Flavobacteriales;f__Flavobacteriaceae;g__NS5_marine_group;s__marine_metagenome_g__NS5_marine_group
OTU273	1	1	0	0	1	1	0	0	1	1	1	d__Bacteria;k__norank;p__Proteobacteria;c__Alphaproteobacteria;o__Rickettsiales;f__SAR116_clade;g__Candidatus_Puniceispirillum;s__uncultured_bacterium_g__Candidatus_Puniceispirillum
OTU274	1	1	1	0	1	1	1	0	1	1	1	d__Bacteria;k__norank;p__unclassified_k__norank;c__unclassified_k__norank;o__unclassified_k__norank;f__unclassified_k__norank;g__unclassified_k__norank;s__unclassified_k__norank
OTU275	1	1	0	0	1	1	1	0	1	1	1	d__Bacteria;k__norank;p__Bacteroidetes;c__Flavobacteriia;o__Flavobacteriales;f__NS7_marine_group;g__norank_f__NS7_marine_group;s__unclassified_g__norank_f__NS7_marine_group
OTU276	1	1	1	0	1	1	1	0	1	1	1	d__Bacteria;k__norank;p__Cyanobacteria;c__Cyanobacteria;o__norank_c__Cyanobacteria;f__norank_c__Cyanobacteria;g__norank_c__Cyanobacteria;s__Phalacroma_mitra
OTU277	1	1	0	0	1	1	0	0	1	0	1	d__Bacteria;k__norank;p__Cyanobacteria;c__Cyanobacteria;o__norank_c__Cyanobacteria;f__norank_c__Cyanobacteria;g__norank_c__Cyanobacteria;s__unclassified_g__norank_c__Cyanobacteria
OTU278	0	1	1	0	0	1	1	0	0	0	0	d__Bacteria;k__norank;p__Marinimicrobia__SAR406_clade_;c__norank_p__Marinimicrobia__SAR406_clade_;o__norank_p__Marinimicrobia__SAR406_clade_;f__norank_p__Marinimicrobia__SAR406_clade_;g__norank_p__Marinimicrobia__SAR406_clade_;s__uncultured_marine_microorganism_g__norank_p__Marinimicrobia__SAR406_clade_
OTU279	1	1	1	1	1	1	1	1	0	0	0	d__Bacteria;k__norank;p__Proteobacteria;c__Alphaproteobacteria;o__Caulobacterales;f__Caulobacteraceae;g__Caulobacter;s__Caulobacter_sp._g__Caulobacter
OTU280	0	0	1	0	0	0	1	0	0	0	0	d__Bacteria;k__norank;p__Proteobacteria;c__Deltaproteobacteria;o__Desulfurellales;f__Desulfurellaceae;g__H16;s__unclassified_g__H16
OTU281	0	0	1	1	0	0	1	1	0	0	0	d__Bacteria;k__norank;p__Planctomycetes;c__Pla3_lineage;o__norank_c__Pla3_lineage;f__norank_c__Pla3_lineage;g__norank_c__Pla3_lineage;s__marine_metagenome_g__norank_c__Pla3_lineage
OTU282	1	1	1	1	0	0	1	0	0	0	0	d__Bacteria;k__norank;p__Proteobacteria;c__Gammaproteobacteria;o__Pseudomonadales;f__Moraxellaceae;g__Acinetobacter;s__Acinetobacter_sp._ANC_4105
OTU283	0	0	1	1	0	0	1	1	0	0	0	d__Bacteria;k__norank;p__Marinimicrobia__SAR406_clade_;c__norank_p__Marinimicrobia__SAR406_clade_;o__norank_p__Marinimicrobia__SAR406_clade_;f__norank_p__Marinimicrobia__SAR406_clade_;g__norank_p__Marinimicrobia__SAR406_clade_;s__unclassified_g__norank_p__Marinimicrobia__SAR406_clade_
OTU284	0	1	1	1	0	1	1	1	0	0	0	d__Bacteria;k__norank;p__Marinimicrobia__SAR406_clade_;c__norank_p__Marinimicrobia__SAR406_clade_;o__norank_p__Marinimicrobia__SAR406_clade_;f__norank_p__Marinimicrobia__SAR406_clade_;g__norank_p__Marinimicrobia__SAR406_clade_;s__uncultured_bacterium_AD261-B2
OTU285	0	1	1	0	0	0	1	1	0	0	0	d__Bacteria;k__norank;p__Proteobacteria;c__Alphaproteobacteria;o__Rhodospirillales;f__Rhodospirillaceae;g__norank_f__Rhodospirillaceae;s__unclassified_g__norank_f__Rhodospirillaceae
OTU286	1	1	1	1	1	1	1	1	1	1	1	d__Bacteria;k__norank;p__Cyanobacteria;c__Cyanobacteria;o__SubsectionI;f__FamilyI_o__SubsectionI;g__Prochlorococcus;s__unclassified_g__Prochlorococcus
OTU287	0	0	1	1	0	0	1	1	0	0	0	d__Bacteria;k__norank;p__Proteobacteria;c__Alphaproteobacteria;o__Rhodospirillales;f__Rhodospirillaceae;g__AEGEAN-169_marine_group;s__unclassified_g__AEGEAN-169_marine_group
OTU288	0	0	1	0	0	0	1	0	0	0	0	d__Bacteria;k__norank;p__Chloroflexi;c__SAR202_clade;o__norank_c__SAR202_clade;f__norank_c__SAR202_clade;g__norank_c__SAR202_clade;s__uncultured_Thermomicrobium_sp._g__norank
OTU289	0	1	1	1	0	1	1	1	0	0	0	d__Bacteria;k__norank;p__Bacteroidetes;c__Flavobacteriia;o__Flavobacteriales;f__unclassified_o__Flavobacteriales;g__unclassified_o__Flavobacteriales;s__unclassified_o__Flavobacteriales
OTU290	0	0	1	0	0	0	1	0	0	0	0	d__Bacteria;k__norank;p__Chloroflexi;c__SAR202_clade;o__norank_c__SAR202_clade;f__norank_c__SAR202_clade;g__norank_c__SAR202_clade;s__unclassified_g__norank_c__SAR202_clade
OTU291	0	0	1	0	0	0	1	0	0	0	0	d__Bacteria;k__norank;p__Nitrospinae;c__Nitrospinia;o__Nitrospinales;f__Nitrospinaceae;g__Nitrospina;s__unclassified_g__Nitrospina
OTU292	0	0	1	1	0	0	1	1	0	0	0	d__Bacteria;k__norank;p__Marinimicrobia__SAR406_clade_;c__norank_p__Marinimicrobia__SAR406_clade_;o__norank_p__Marinimicrobia__SAR406_clade_;f__norank_p__Marinimicrobia__SAR406_clade_;g__norank_p__Marinimicrobia__SAR406_clade_;s__uncultured_bacterium_HF0500_01L02
OTU293	0	0	1	0	0	0	1	0	0	0	0	d__Bacteria;k__norank;p__Proteobacteria;c__Gammaproteobacteria;o__E01-9C-26_marine_group;f__norank_o__E01-9C-26_marine_group;g__norank_o__E01-9C-26_marine_group;s__uncultured_marine_microorganism_g__norank_o__E01-9C-26_marine_group
OTU294	1	0	1	0	0	1	1	1	1	1	0	d__Bacteria;k__norank;p__Proteobacteria;c__Deltaproteobacteria;o__Bdellovibrionales;f__Bdellovibrionaceae;g__OM27_clade;s__uncultured_delta_proteobacterium_g__OM27_clade
OTU295	0	1	1	1	1	1	1	1	1	0	1	d__Bacteria;k__norank;p__Proteobacteria;c__Deltaproteobacteria;o__Bdellovibrionales;f__Bdellovibrionaceae;g__OM27_clade;s__uncultured_delta_proteobacterium_g__OM27_clade
OTU296	0	0	1	0	0	0	1	1	0	0	0	d__Bacteria;k__norank;p__Chloroflexi;c__SAR202_clade;o__norank_c__SAR202_clade;f__norank_c__SAR202_clade;g__norank_c__SAR202_clade;s__unclassified_g__norank_c__SAR202_clade
OTU297	0	0	1	1	0	0	1	1	0	0	0	d__Bacteria;k__norank;p__Marinimicrobia__SAR406_clade_;c__norank_p__Marinimicrobia__SAR406_clade_;o__norank_p__Marinimicrobia__SAR406_clade_;f__norank_p__Marinimicrobia__SAR406_clade_;g__norank_p__Marinimicrobia__SAR406_clade_;s__uncultured_bacterium_g__norank_p__Marinimicrobia__SAR406_clade_
OTU298	0	0	1	1	0	1	1	1	0	0	0	d__Bacteria;k__norank;p__Cyanobacteria;c__Cyanobacteria;o__norank_c__Cyanobacteria;f__norank_c__Cyanobacteria;g__norank_c__Cyanobacteria;s__marine_metagenome_g__norank_c__Cyanobacteria
OTU299	0	0	1	1	0	0	1	1	0	0	0	d__Bacteria;k__norank;p__Proteobacteria;c__Gammaproteobacteria;o__Chromatiales;f__Granulosicoccaceae;g__Granulosicoccus;s__uncultured_bacterium_g__Granulosicoccus
OTU300	0	0	1	0	0	0	0	0	0	0	0	d__Bacteria;k__norank;p__Proteobacteria;c__Alphaproteobacteria;o__Rhodospirillales;f__AT-s3-44;g__norank_f__AT-s3-44;s__uncultured_bacterium_KM3-69-D9
OTU301	0	0	1	0	0	0	1	1	0	0	0	d__Bacteria;k__norank;p__Actinobacteria;c__Actinobacteria;o__Corynebacteriales;f__Mycobacteriaceae;g__Mycobacterium;s__unclassified_g__Mycobacterium
OTU302	0	0	1	0	0	0	1	0	0	0	0	d__Bacteria;k__norank;p__Marinimicrobia__SAR406_clade_;c__norank_p__Marinimicrobia__SAR406_clade_;o__norank_p__Marinimicrobia__SAR406_clade_;f__norank_p__Marinimicrobia__SAR406_clade_;g__norank_p__Marinimicrobia__SAR406_clade_;s__unclassified_g__norank_p__Marinimicrobia__SAR406_clade_
OTU303	0	0	1	0	0	0	1	1	0	0	0	d__Bacteria;k__norank;p__Planctomycetes;c__unclassified_p__Planctomycetes;o__unclassified_p__Planctomycetes;f__unclassified_p__Planctomycetes;g__unclassified_p__Planctomycetes;s__unclassified_p__Planctomycetes
OTU304	0	0	1	1	0	0	1	1	0	0	0	d__Bacteria;k__norank;p__Planctomycetes;c__OM190;o__norank_c__OM190;f__norank_c__OM190;g__norank_c__OM190;s__uncultured_planctomycete_g__norank_c__OM190
OTU305	0	0	1	1	0	1	1	1	0	0	0	d__Bacteria;k__norank;p__Marinimicrobia__SAR406_clade_;c__norank_p__Marinimicrobia__SAR406_clade_;o__norank_p__Marinimicrobia__SAR406_clade_;f__norank_p__Marinimicrobia__SAR406_clade_;g__norank_p__Marinimicrobia__SAR406_clade_;s__Marinimicrobia_bacterium_SCGC_AAA003-E22
OTU306	0	0	1	0	0	0	1	1	0	0	0	d__Bacteria;k__norank;p__Proteobacteria;c__Deltaproteobacteria;o__Oligoflexales;f__Oligoflexaceae;g__norank_f__Oligoflexaceae;s__unclassified_g__norank_f__Oligoflexaceae
OTU307	0	1	1	0	0	0	0	0	0	0	0	d__Bacteria;k__norank;p__Proteobacteria;c__Gammaproteobacteria;o__Pseudomonadales;f__unclassified_o__Pseudomonadales;g__unclassified_o__Pseudomonadales;s__unclassified_o__Pseudomonadales
OTU308	0	0	1	0	0	0	1	0	0	0	0	d__Bacteria;k__norank;p__Chloroflexi;c__SAR202_clade;o__norank_c__SAR202_clade;f__norank_c__SAR202_clade;g__norank_c__SAR202_clade;s__uncultured_marine_microorganism_g__norank_c__SAR202_clade
OTU309	0	1	1	0	0	1	1	1	0	0	0	d__Bacteria;k__norank;p__Actinobacteria;c__Actinobacteria;o__Acidimicrobiales;f__OM1_clade;g__Candidatus_Actinomarina;s__uncultured_bacterium_g__Candidatus_Actinomarina
OTU310	0	0	1	1	0	0	1	1	0	0	0	d__Bacteria;k__norank;p__Chloroflexi;c__SAR202_clade;o__norank_c__SAR202_clade;f__norank_c__SAR202_clade;g__norank_c__SAR202_clade;s__uncultured_bacterium_g__norank_c__SAR202_clade
OTU311	1	1	1	1	1	1	1	1	1	1	1	d__Bacteria;k__norank;p__Proteobacteria;c__Gammaproteobacteria;o__Pseudomonadales;f__Moraxellaceae;g__Acinetobacter;s__Acinetobacter_junii_NIPH_182
OTU312	1	1	1	0	1	1	1	1	1	1	1	d__Bacteria;k__norank;p__Proteobacteria;c__Gammaproteobacteria;o__Thiotrichales;f__Thiotrichales_Incertae_Sedis;g__Candidatus_Endoecteinascidia;s__uncultured_gamma_proteobacterium_g__Candidatus_Endoecteinascidia
OTU313	0	0	1	0	0	1	1	1	0	0	0	d__Bacteria;k__norank;p__Bacteroidetes;c__Flavobacteriia;o__Flavobacteriales;f__unclassified_o__Flavobacteriales;g__unclassified_o__Flavobacteriales;s__unclassified_o__Flavobacteriales
OTU314	0	0	1	0	0	0	1	0	0	0	0	d__Bacteria;k__norank;p__BRC1;c__norank_p__BRC1;o__norank_p__BRC1;f__norank_p__BRC1;g__norank_p__BRC1;s__unclassified_g__norank_p__BRC1
OTU315	0	0	1	1	0	0	1	1	0	0	0	d__Bacteria;k__norank;p__Poribacteria;c__norank_p__Poribacteria;o__norank_p__Poribacteria;f__norank_p__Poribacteria;g__norank_p__Poribacteria;s__marine_metagenome_g__norank_p__Poribacteria
OTU316	1	1	1	1	1	1	1	1	1	1	1	d__Bacteria;k__norank;p__Bacteroidetes;c__Flavobacteriia;o__Flavobacteriales;f__Flavobacteriaceae;g__NS2b_marine_group;s__uncultured_bacterium_g__NS2b_marine_group
OTU317	0	0	1	0	0	0	1	0	0	0	0	d__Bacteria;k__norank;p__Chloroflexi;c__SAR202_clade;o__norank_c__SAR202_clade;f__norank_c__SAR202_clade;g__norank_c__SAR202_clade;s__unclassified_g__norank_c__SAR202_clade
OTU318	1	1	1	1	1	1	1	1	0	1	0	d__Bacteria;k__norank;p__Bacteroidetes;c__Flavobacteriia;o__Flavobacteriales;f__NS7_marine_group;g__norank_f__NS7_marine_group;s__unclassified_g__norank_f__NS7_marine_group
OTU319	0	0	1	1	0	0	1	1	0	0	0	d__Bacteria;k__norank;p__Proteobacteria;c__Deltaproteobacteria;o__Oligoflexales;f__Oligoflexaceae;g__norank_f__Oligoflexaceae;s__marine_metagenome_g__norank_f__Oligoflexaceae
OTU320	0	0	1	1	0	0	0	1	0	0	0	d__Bacteria;k__norank;p__Proteobacteria;c__Deltaproteobacteria;o__Oligoflexales;f__Oligoflexaceae;g__norank_f__Oligoflexaceae;s__unclassified_g__norank_f__Oligoflexaceae
OTU321	0	0	1	0	0	0	1	0	0	0	0	d__Bacteria;k__norank;p__Verrucomicrobia;c__Arctic97B-4_marine_group;o__norank_c__Arctic97B-4_marine_group;f__norank_c__Arctic97B-4_marine_group;g__norank_c__Arctic97B-4_marine_group;s__unclassified_g__norank_c__Arctic97B-4_marine_group
OTU322	0	0	1	0	0	0	1	0	0	0	0	d__Bacteria;k__norank;p__Acidobacteria;c__Acidobacteria;o__norank_c__Acidobacteria;f__norank_c__Acidobacteria;g__norank_c__Acidobacteria;s__unclassified_g__norank_c__Acidobacteria
OTU323	0	0	1	1	0	0	1	1	0	0	0	d__Bacteria;k__norank;p__Acidobacteria;c__Acidobacteria;o__norank_c__Acidobacteria;f__norank_c__Acidobacteria;g__norank_c__Acidobacteria;s__uncultured_bacterium_KM3-205-D9
OTU324	0	0	1	0	0	0	1	0	0	0	0	d__Bacteria;k__norank;p__unclassified_k__norank;c__unclassified_k__norank;o__unclassified_k__norank;f__unclassified_k__norank;g__unclassified_k__norank;s__unclassified_k__norank
OTU325	1	1	1	0	1	1	0	0	1	1	1	d__Bacteria;k__norank;p__Proteobacteria;c__Gammaproteobacteria;o__Oceanospirillales;f__OM182_clade;g__norank_f__OM182_clade;s__uncultured_bacterium_g__norank_f__OM182_clade
OTU326	0	0	1	1	0	0	1	0	0	0	0	d__Bacteria;k__norank;p__unclassified_k__norank;c__unclassified_k__norank;o__unclassified_k__norank;f__unclassified_k__norank;g__unclassified_k__norank;s__unclassified_k__norank
OTU327	0	0	1	1	0	0	1	1	0	0	0	d__Bacteria;k__norank;p__Verrucomicrobia;c__Opitutae;o__MB11C04_marine_group;f__norank_o__MB11C04_marine_group;g__norank_o__MB11C04_marine_group;s__uncultured_marine_microorganism_g__norank_o__MB11C04_marine_group
OTU328	0	0	1	1	0	0	1	1	0	0	0	d__Bacteria;k__norank;p__Proteobacteria;c__Gammaproteobacteria;o__unclassified_c__Gammaproteobacteria;f__unclassified_c__Gammaproteobacteria;g__unclassified_c__Gammaproteobacteria;s__unclassified_c__Gammaproteobacteria
OTU329	0	1	1	1	0	1	1	1	0	0	0	d__Bacteria;k__norank;p__Marinimicrobia__SAR406_clade_;c__norank_p__Marinimicrobia__SAR406_clade_;o__norank_p__Marinimicrobia__SAR406_clade_;f__norank_p__Marinimicrobia__SAR406_clade_;g__norank_p__Marinimicrobia__SAR406_clade_;s__unclassified_g__norank_p__Marinimicrobia__SAR406_clade_
OTU330	1	1	1	1	1	1	1	1	1	0	1	d__Bacteria;k__norank;p__Firmicutes;c__Bacilli;o__Bacillales;f__Staphylococcaceae;g__Staphylococcus;s__unclassified_g__Staphylococcus
OTU331	0	0	1	1	0	1	1	1	0	0	0	d__Bacteria;k__norank;p__Bacteroidetes;c__Flavobacteriia;o__Flavobacteriales;f__NS9_marine_group;g__norank_f__NS9_marine_group;s__unclassified_g__norank_f__NS9_marine_group
OTU332	0	0	1	1	0	0	1	1	0	0	0	d__Bacteria;k__norank;p__Chloroflexi;c__SAR202_clade;o__norank_c__SAR202_clade;f__norank_c__SAR202_clade;g__norank_c__SAR202_clade;s__unclassified_g__norank_c__SAR202_clade
OTU333	0	0	1	0	0	0	1	1	0	0	0	d__Bacteria;k__norank;p__Nitrospinae;c__MD2898-B26;o__norank_c__MD2898-B26;f__norank_c__MD2898-B26;g__norank_c__MD2898-B26;s__unclassified_g__norank_c__MD2898-B26
OTU334	0	1	1	1	0	0	1	1	0	0	0	d__Bacteria;k__norank;p__Proteobacteria;c__Gammaproteobacteria;o__Oceanospirillales;f__JL-ETNP-Y6;g__norank_f__JL-ETNP-Y6;s__uncultured_bacterium_g__norank_f__JL-ETNP-Y6
OTU335	0	0	1	0	0	0	1	1	0	0	0	d__Bacteria;k__norank;p__Marinimicrobia__SAR406_clade_;c__norank_p__Marinimicrobia__SAR406_clade_;o__norank_p__Marinimicrobia__SAR406_clade_;f__norank_p__Marinimicrobia__SAR406_clade_;g__norank_p__Marinimicrobia__SAR406_clade_;s__unclassified_g__norank_p__Marinimicrobia__SAR406_clade_
OTU336	0	1	1	1	0	1	1	1	0	0	0	d__Bacteria;k__norank;p__Proteobacteria;c__Alphaproteobacteria;o__SAR11_clade;f__Deep_1;g__norank_f__Deep_1;s__unclassified_g__norank_f__Deep_1
OTU337	0	0	1	1	0	0	0	1	0	0	0	d__Bacteria;k__norank;p__Bacteroidetes;c__Flavobacteriia;o__Flavobacteriales;f__Cryomorphaceae;g__Salinirepens;s__uncultured_bacterium_g__Salinirepens
OTU338	0	0	1	0	0	1	1	1	0	0	0	d__Bacteria;k__norank;p__Marinimicrobia__SAR406_clade_;c__norank_p__Marinimicrobia__SAR406_clade_;o__norank_p__Marinimicrobia__SAR406_clade_;f__norank_p__Marinimicrobia__SAR406_clade_;g__norank_p__Marinimicrobia__SAR406_clade_;s__uncultured_bacterium_g__norank_p__Marinimicrobia__SAR406_clade_
OTU339	0	0	1	0	0	0	1	1	0	0	0	d__Bacteria;k__norank;p__Proteobacteria;c__Gammaproteobacteria;o__Gammaproteobacteria_Incertae_Sedis;f__Unknown_Family_o__Gammaproteobacteria_Incertae_Sedis;g__norank_f__Unknown_Family_o__Gammaproteobacteria_Incertae_Sedis;s__marine_metagenome_g__norank_f__Unknown_Family_o__Gammaproteobacteria_Incertae_Sedis
OTU340	0	0	1	1	0	0	1	1	0	0	0	d__Bacteria;k__norank;p__Acidobacteria;c__Acidobacteria;o__norank_c__Acidobacteria;f__norank_c__Acidobacteria;g__norank_c__Acidobacteria;s__unclassified_g__norank_c__Acidobacteria
OTU341	0	0	1	1	0	0	1	1	0	0	0	d__Bacteria;k__norank;p__Acidobacteria;c__Acidobacteria;o__norank_c__Acidobacteria;f__norank_c__Acidobacteria;g__norank_c__Acidobacteria;s__unclassified_g__norank_c__Acidobacteria
OTU342	0	1	1	1	0	1	1	1	0	0	0	d__Bacteria;k__norank;p__Proteobacteria;c__Gammaproteobacteria;o__Gammaproteobacteria_Incertae_Sedis;f__Unknown_Family_o__Gammaproteobacteria_Incertae_Sedis;g__norank_f__Unknown_Family_o__Gammaproteobacteria_Incertae_Sedis;s__marine_metagenome_g__norank_f__Unknown_Family_o__Gammaproteobacteria_Incertae_Sedis
OTU343	0	1	1	0	0	1	1	0	0	0	0	d__Bacteria;k__norank;p__Marinimicrobia__SAR406_clade_;c__norank_p__Marinimicrobia__SAR406_clade_;o__norank_p__Marinimicrobia__SAR406_clade_;f__norank_p__Marinimicrobia__SAR406_clade_;g__norank_p__Marinimicrobia__SAR406_clade_;s__uncultured_bacterium_g__norank_p__Marinimicrobia__SAR406_clade_
OTU344	0	1	1	1	0	1	1	1	0	0	0	d__Bacteria;k__norank;p__Proteobacteria;c__Alphaproteobacteria;o__Rhodospirillales;f__Rhodospirillaceae;g__AEGEAN-169_marine_group;s__unclassified_g__AEGEAN-169_marine_group
OTU345	0	0	1	1	0	0	1	1	0	0	0	d__Bacteria;k__norank;p__Marinimicrobia__SAR406_clade_;c__norank_p__Marinimicrobia__SAR406_clade_;o__norank_p__Marinimicrobia__SAR406_clade_;f__norank_p__Marinimicrobia__SAR406_clade_;g__norank_p__Marinimicrobia__SAR406_clade_;s__uncultured_bacterium_405006-B04
OTU346	0	0	1	1	0	0	1	1	0	0	0	d__Bacteria;k__norank;p__Proteobacteria;c__Alphaproteobacteria;o__Rhodospirillales;f__Rhodospirillaceae;g__AEGEAN-169_marine_group;s__uncultured_bacterium_g__AEGEAN-169_marine_group
OTU347	1	1	1	0	0	0	0	0	0	0	0	d__Bacteria;k__norank;p__Bacteroidetes;c__Sphingobacteriia;o__Sphingobacteriales;f__Chitinophagaceae;g__Sediminibacterium;s__uncultured_Sphingobacteriia_bacterium_g__Sediminibacterium
OTU348	0	0	1	0	0	0	1	0	0	0	0	d__Bacteria;k__norank;p__Acidobacteria;c__Acidobacteria;o__norank_c__Acidobacteria;f__norank_c__Acidobacteria;g__norank_c__Acidobacteria;s__uncultured_hydrocarbon_seep_bacterium_BPC102
OTU349	0	0	1	1	0	0	1	1	0	0	0	d__Bacteria;k__norank;p__Proteobacteria;c__Deltaproteobacteria;o__NB1-j;f__norank_o__NB1-j;g__norank_o__NB1-j;s__uncultured_myxobacterium_HF0200_01L06
OTU350	0	0	1	1	0	0	1	1	0	0	0	d__Bacteria;k__norank;p__Planctomycetes;c__Pla4_lineage;o__norank_c__Pla4_lineage;f__norank_c__Pla4_lineage;g__norank_c__Pla4_lineage;s__uncultured_bacterium_g__norank_c__Pla4_lineage
OTU351	0	0	1	1	0	0	1	1	0	0	0	d__Bacteria;k__norank;p__Proteobacteria;c__Deltaproteobacteria;o__NB1-j;f__norank_o__NB1-j;g__norank_o__NB1-j;s__uncultured_delta_proteobacterium_g__norank_o__NB1-j
OTU352	0	0	1	0	0	0	1	0	0	0	0	d__Bacteria;k__norank;p__PAUC34f;c__norank_p__PAUC34f;o__norank_p__PAUC34f;f__norank_p__PAUC34f;g__norank_p__PAUC34f;s__uncultured_marine_bacterium_g__norank_p__PAUC34f
OTU353	0	0	1	1	0	0	1	1	0	0	0	d__Bacteria;k__norank;p__Marinimicrobia__SAR406_clade_;c__norank_p__Marinimicrobia__SAR406_clade_;o__norank_p__Marinimicrobia__SAR406_clade_;f__norank_p__Marinimicrobia__SAR406_clade_;g__norank_p__Marinimicrobia__SAR406_clade_;s__uncultured_bacterium_g__norank_p__Marinimicrobia__SAR406_clade_
OTU354	0	0	1	0	0	0	1	1	0	0	0	d__Bacteria;k__norank;p__Proteobacteria;c__Deltaproteobacteria;o__Myxococcales;f__P3OB-42;g__norank_f__P3OB-42;s__uncultured_bacterium_g__norank_f__P3OB-42
OTU355	1	1	1	1	0	0	0	0	0	0	0	d__Bacteria;k__norank;p__Proteobacteria;c__Gammaproteobacteria;o__Pseudomonadales;f__Moraxellaceae;g__Acinetobacter;s__unclassified_g__Acinetobacter
OTU356	0	0	1	1	0	0	1	1	0	0	0	d__Bacteria;k__norank;p__Marinimicrobia__SAR406_clade_;c__norank_p__Marinimicrobia__SAR406_clade_;o__norank_p__Marinimicrobia__SAR406_clade_;f__norank_p__Marinimicrobia__SAR406_clade_;g__norank_p__Marinimicrobia__SAR406_clade_;s__hydrothermal_vent_metagenome_g__norank_p__Marinimicrobia__SAR406_clade_
OTU357	1	1	1	1	1	0	1	0	0	0	0	d__Bacteria;k__norank;p__Proteobacteria;c__Gammaproteobacteria;o__Pseudomonadales;f__Moraxellaceae;g__Acinetobacter;s__unclassified_g__Acinetobacter
OTU358	0	1	1	1	0	1	1	1	1	1	0	d__Bacteria;k__norank;p__Marinimicrobia__SAR406_clade_;c__norank_p__Marinimicrobia__SAR406_clade_;o__norank_p__Marinimicrobia__SAR406_clade_;f__norank_p__Marinimicrobia__SAR406_clade_;g__norank_p__Marinimicrobia__SAR406_clade_;s__unclassified_g__norank_p__Marinimicrobia__SAR406_clade_
OTU359	0	0	1	1	0	0	1	1	0	0	0	d__Bacteria;k__norank;p__Planctomycetes;c__OM190;o__norank_c__OM190;f__norank_c__OM190;g__norank_c__OM190;s__uncultured_Planctomyces_sp._g__norank
OTU360	0	1	1	0	0	1	1	1	1	0	1	d__Bacteria;k__norank;p__Proteobacteria;c__Gammaproteobacteria;o__Oceanospirillales;f__OM182_clade;g__norank_f__OM182_clade;s__unclassified_g__norank_f__OM182_clade
OTU361	0	1	0	0	1	1	0	0	0	1	1	d__Bacteria;k__norank;p__Proteobacteria;c__Alphaproteobacteria;o__Rhodospirillales;f__Rhodospirillaceae;g__norank_f__Rhodospirillaceae;s__unclassified_g__norank_f__Rhodospirillaceae
OTU362	0	1	0	0	1	1	0	0	0	1	0	d__Bacteria;k__norank;p__Proteobacteria;c__Alphaproteobacteria;o__Rickettsiales;f__unclassified_o__Rickettsiales;g__unclassified_o__Rickettsiales;s__unclassified_o__Rickettsiales
OTU363	0	1	1	1	0	0	0	0	0	0	0	d__Bacteria;k__norank;p__Firmicutes;c__Bacilli;o__Bacillales;f__Bacillaceae;g__Bacillus;s__unclassified_g__Bacillus
OTU364	0	1	0	0	1	1	0	0	0	0	0	d__Bacteria;k__norank;p__Proteobacteria;c__Gammaproteobacteria;o__Cellvibrionales;f__Halieaceae;g__Parahaliea;s__uncultured_gamma_proteobacterium_g__Parahaliea
OTU365	1	1	0	0	1	1	0	1	1	1	1	d__Bacteria;k__norank;p__Cyanobacteria;c__Cyanobacteria;o__norank_c__Cyanobacteria;f__norank_c__Cyanobacteria;g__norank_c__Cyanobacteria;s__unclassified_g__norank_c__Cyanobacteria
OTU366	1	1	1	1	1	1	1	1	1	1	1	d__Bacteria;k__norank;p__Bacteroidetes;c__Flavobacteriia;o__Flavobacteriales;f__Cryomorphaceae;g__Fluviicola;s__uncultured_marine_bacterium_g__Fluviicola
OTU367	0	1	1	0	0	0	0	0	0	0	0	d__Bacteria;k__norank;p__Bacteroidetes;c__Flavobacteriia;o__Flavobacteriales;f__Flavobacteriaceae;g__Empedobacter;s__Empedobacter_brevis_g__Empedobacter
OTU368	0	1	0	0	0	0	0	0	0	0	0	d__Bacteria;k__norank;p__Bacteroidetes;c__Cytophagia;o__Cytophagales;f__Cytophagaceae;g__Pontibacter;s__uncultured_bacterium_g__Pontibacter
OTU369	1	1	0	0	1	1	0	0	1	1	1	d__Bacteria;k__norank;p__Proteobacteria;c__Gammaproteobacteria;o__Oceanospirillales;f__SAR86_clade;g__norank_f__SAR86_clade;s__unclassified_g__norank_f__SAR86_clade
OTU370	0	1	1	0	0	0	1	1	0	0	0	d__Bacteria;k__norank;p__Bacteroidetes;c__Flavobacteriia;o__Flavobacteriales;f__Cryomorphaceae;g__unclassified_f__Cryomorphaceae;s__unclassified_f__Cryomorphaceae
OTU371	1	1	1	0	0	0	0	0	0	0	0	d__Bacteria;k__norank;p__Bacteroidetes;c__Flavobacteriia;o__Flavobacteriales;f__Flavobacteriaceae;g__Empedobacter;s__uncultured_bacterium_g__Empedobacter
OTU372	1	1	1	0	0	1	0	0	0	0	0	d__Bacteria;k__norank;p__Cyanobacteria;c__Cyanobacteria;o__norank_c__Cyanobacteria;f__norank_c__Cyanobacteria;g__norank_c__Cyanobacteria;s__unclassified_g__norank_c__Cyanobacteria
OTU373	0	1	0	0	0	0	0	0	0	0	0	d__Bacteria;k__norank;p__Proteobacteria;c__Gammaproteobacteria;o__Vibrionales;f__Vibrionaceae;g__Vibrio;s__unclassified_g__Vibrio
OTU374	1	1	1	0	1	1	0	1	1	1	1	d__Bacteria;k__norank;p__Marinimicrobia__SAR406_clade_;c__norank_p__Marinimicrobia__SAR406_clade_;o__norank_p__Marinimicrobia__SAR406_clade_;f__norank_p__Marinimicrobia__SAR406_clade_;g__norank_p__Marinimicrobia__SAR406_clade_;s__unidentified_marine_bacterioplankton_g__norank_p__Marinimicrobia__SAR406_clade_
OTU375	1	1	1	0	0	0	0	0	0	0	0	d__Bacteria;k__norank;p__Bacteroidetes;c__Sphingobacteriia;o__Sphingobacteriales;f__Chitinophagaceae;g__Vibrionimonas;s__uncultured_bacterium_g__Vibrionimonas
OTU376	0	1	1	0	0	1	0	0	1	1	0	d__Bacteria;k__norank;p__Bacteroidetes;c__Flavobacteriia;o__Flavobacteriales;f__Cryomorphaceae;g__NS10_marine_group;s__uncultured_bacterium_g__NS10_marine_group
OTU377	1	1	0	0	0	0	0	0	0	0	0	d__Bacteria;k__norank;p__Firmicutes;c__Bacilli;o__Bacillales;f__Bacillaceae;g__Bacillus;s__Bacillus_infantis_g__Bacillus
OTU378	0	1	1	0	1	1	1	0	1	1	1	d__Bacteria;k__norank;p__Chloroflexi;c__SAR202_clade;o__norank_c__SAR202_clade;f__norank_c__SAR202_clade;g__norank_c__SAR202_clade;s__marine_metagenome_g__norank_c__SAR202_clade
OTU379	0	1	0	0	0	1	0	0	0	0	0	d__Bacteria;k__norank;p__Proteobacteria;c__Gammaproteobacteria;o__Oceanospirillales;f__SAR86_clade;g__norank_f__SAR86_clade;s__unclassified_g__norank_f__SAR86_clade
OTU380	1	1	0	0	1	1	1	0	0	1	1	d__Bacteria;k__norank;p__Proteobacteria;c__Gammaproteobacteria;o__Oceanospirillales;f__Oceanospirillaceae;g__Pseudohongiella;s__marine_metagenome_g__Pseudohongiella
OTU381	1	1	1	1	0	1	1	0	1	0	1	d__Bacteria;k__norank;p__Proteobacteria;c__Gammaproteobacteria;o__Vibrionales;f__Vibrionaceae;g__Vibrio;s__Vibrio_chagasii
OTU382	1	1	1	0	0	1	1	1	0	0	0	d__Bacteria;k__norank;p__Bacteroidetes;c__Cytophagia;o__Cytophagales;f__Flammeovirgaceae;g__Marinoscillum;s__uncultured_marine_bacterium_g__Marinoscillum
OTU383	0	1	1	0	0	1	1	0	0	0	0	d__Bacteria;k__norank;p__Proteobacteria;c__Gammaproteobacteria;o__Salinisphaerales;f__Salinisphaeraceae;g__ZD0417_marine_group;s__marine_metagenome_g__ZD0417_marine_group
OTU384	0	1	1	1	1	1	1	1	1	1	1	d__Bacteria;k__norank;p__unclassified_k__norank;c__unclassified_k__norank;o__unclassified_k__norank;f__unclassified_k__norank;g__unclassified_k__norank;s__unclassified_k__norank
OTU385	0	1	1	0	0	0	1	1	0	0	0	d__Bacteria;k__norank;p__unclassified_k__norank;c__unclassified_k__norank;o__unclassified_k__norank;f__unclassified_k__norank;g__unclassified_k__norank;s__unclassified_k__norank
OTU386	1	1	1	0	1	1	1	0	1	1	1	d__Bacteria;k__norank;p__Proteobacteria;c__Gammaproteobacteria;o__Oceanospirillales;f__SAR86_clade;g__norank_f__SAR86_clade;s__uncultured_bacterium_g__norank_f__SAR86_clade
OTU387	1	1	0	0	0	1	0	0	1	1	0	d__Bacteria;k__norank;p__Verrucomicrobia;c__OPB35_soil_group;o__norank_c__OPB35_soil_group;f__norank_c__OPB35_soil_group;g__norank_c__OPB35_soil_group;s__bacterium_SH5-3
OTU388	1	1	1	1	1	1	1	1	1	1	1	d__Bacteria;k__norank;p__Proteobacteria;c__Gammaproteobacteria;o__Vibrionales;f__Vibrionaceae;g__Vibrio;s__unclassified_g__Vibrio
OTU389	1	1	1	0	1	1	1	0	1	1	1	d__Bacteria;k__norank;p__Proteobacteria;c__Gammaproteobacteria;o__Oceanospirillales;f__SAR86_clade;g__norank_f__SAR86_clade;s__marine_metagenome_g__norank_f__SAR86_clade
OTU390	1	1	1	1	1	1	1	1	1	1	1	d__Bacteria;k__norank;p__Proteobacteria;c__Gammaproteobacteria;o__Vibrionales;f__Vibrionaceae;g__Vibrio;s__unclassified_g__Vibrio
OTU391	0	1	0	1	0	0	0	0	0	0	0	d__Bacteria;k__norank;p__Proteobacteria;c__Gammaproteobacteria;o__Xanthomonadales;f__Xanthomonadaceae;g__Stenotrophomonas;s__[Pseudomonas]_geniculata_g__Stenotrophomonas
OTU392	0	1	0	1	0	0	1	0	1	0	0	d__Bacteria;k__norank;p__Proteobacteria;c__Gammaproteobacteria;o__Pseudomonadales;f__Pseudomonadaceae;g__Pseudomonas;s__unclassified_g__Pseudomonas
OTU393	1	1	1	1	0	1	1	1	0	0	0	d__Bacteria;k__norank;p__Proteobacteria;c__Gammaproteobacteria;o__Alteromonadales;f__Shewanellaceae;g__Shewanella;s__Shewanella_decolorationis
OTU394	0	1	0	1	0	0	0	0	0	0	0	d__Bacteria;k__norank;p__Firmicutes;c__Bacilli;o__Bacillales;f__Family_XII_o__Bacillales;g__Exiguobacterium;s__Exiguobacterium_sp._MH3
OTU395	0	1	1	0	0	1	1	1	0	0	0	d__Bacteria;k__norank;p__Proteobacteria;c__Alphaproteobacteria;o__Rhodospirillales;f__Rhodospirillaceae;g__Magnetospira;s__uncultured_nuHF1_cluster_bacterium_HF0130_24M16
OTU396	0	1	1	0	0	1	0	0	0	0	0	d__Bacteria;k__norank;p__Proteobacteria;c__Gammaproteobacteria;o__Xanthomonadales;f__JTB255_marine_benthic_group;g__norank_f__JTB255_marine_benthic_group;s__marine_metagenome_g__norank_f__JTB255_marine_benthic_group
OTU397	0	1	1	1	0	0	0	0	0	0	0	d__Bacteria;k__norank;p__Firmicutes;c__Bacilli;o__Bacillales;f__Bacillaceae;g__Bacillus;s__Bacillus_halmapalus
OTU398	0	1	1	1	0	0	0	0	0	0	0	d__Bacteria;k__norank;p__Proteobacteria;c__Gammaproteobacteria;o__unclassified_c__Gammaproteobacteria;f__unclassified_c__Gammaproteobacteria;g__unclassified_c__Gammaproteobacteria;s__unclassified_c__Gammaproteobacteria
OTU399	0	1	1	0	0	1	1	0	0	0	0	d__Bacteria;k__norank;p__Bacteroidetes;c__Flavobacteriia;o__Flavobacteriales;f__Flavobacteriaceae;g__NS5_marine_group;s__marine_metagenome_g__NS5_marine_group
OTU400	0	1	1	1	0	0	1	0	0	0	0	d__Bacteria;k__norank;p__Proteobacteria;c__Betaproteobacteria;o__Burkholderiales;f__Comamonadaceae;g__Comamonas;s__Comamonas_testosteroni_g__Comamonas
OTU401	0	0	1	1	0	0	1	1	0	0	0	d__Bacteria;k__norank;p__Chloroflexi;c__SAR202_clade;o__norank_c__SAR202_clade;f__norank_c__SAR202_clade;g__norank_c__SAR202_clade;s__uncultured_SAR202_cluster_bacterium
OTU402	0	0	0	1	0	0	1	1	0	0	0	d__Bacteria;k__norank;p__unclassified_k__norank;c__unclassified_k__norank;o__unclassified_k__norank;f__unclassified_k__norank;g__unclassified_k__norank;s__unclassified_k__norank
OTU403	0	0	0	1	0	0	1	1	0	0	0	d__Bacteria;k__norank;p__Cyanobacteria;c__Cyanobacteria;o__norank_c__Cyanobacteria;f__norank_c__Cyanobacteria;g__norank_c__Cyanobacteria;s__uncultured_Candidatus_Marinimicrobia_bacterium_g__norank
OTU404	0	1	0	1	0	0	0	0	0	0	0	d__Bacteria;k__norank;p__Proteobacteria;c__Gammaproteobacteria;o__Oceanospirillales;f__Halomonadaceae;g__Halomonas;s__unclassified_g__Halomonas
OTU405	0	0	0	1	0	0	1	1	0	0	0	d__Bacteria;k__norank;p__Chloroflexi;c__SAR202_clade;o__norank_c__SAR202_clade;f__norank_c__SAR202_clade;g__norank_c__SAR202_clade;s__uncultured_bacterium_g__norank_c__SAR202_clade
OTU406	0	0	0	1	0	0	0	1	0	0	0	d__Bacteria;k__norank;p__Planctomycetes;c__Phycisphaerae;o__Phycisphaerales;f__Phycisphaeraceae;g__norank_f__Phycisphaeraceae;s__unclassified_g__norank_f__Phycisphaeraceae
OTU407	0	0	1	1	0	1	1	1	0	0	0	d__Bacteria;k__norank;p__Planctomycetes;c__Phycisphaerae;o__Phycisphaerales;f__Phycisphaeraceae;g__CL500-3;s__uncultured_Phycisphaeraceae_bacterium_g__CL500-3
OTU408	0	0	1	1	0	0	1	1	0	0	0	d__Bacteria;k__norank;p__Chloroflexi;c__SAR202_clade;o__norank_c__SAR202_clade;f__norank_c__SAR202_clade;g__norank_c__SAR202_clade;s__uncultured_gamma_proteobacterium_g__norank_c__SAR202_clade
OTU409	0	0	0	1	0	0	0	0	0	0	0	d__Bacteria;k__norank;p__Actinobacteria;c__Actinobacteria;o__Acidimicrobiales;f__OM1_clade;g__norank_f__OM1_clade;s__uncultured_Gram-positive_bacterium_g__norank_f__OM1_clade
OTU410	0	0	1	1	0	0	1	1	0	0	0	d__Bacteria;k__norank;p__Chloroflexi;c__SAR202_clade;o__norank_c__SAR202_clade;f__norank_c__SAR202_clade;g__norank_c__SAR202_clade;s__unclassified_g__norank_c__SAR202_clade
OTU411	1	0	0	1	1	0	0	0	1	0	1	d__Bacteria;k__norank;p__Bacteroidetes;c__Flavobacteriia;o__Flavobacteriales;f__Flavobacteriaceae;g__Tenacibaculum;s__Flexibacter_echinicida
OTU412	0	0	1	1	0	0	1	1	0	0	0	d__Bacteria;k__norank;p__Planctomycetes;c__OM190;o__norank_c__OM190;f__norank_c__OM190;g__norank_c__OM190;s__unclassified_g__norank_c__OM190
OTU413	0	0	1	1	0	0	1	1	0	0	0	d__Bacteria;k__norank;p__Chloroflexi;c__SAR202_clade;o__norank_c__SAR202_clade;f__norank_c__SAR202_clade;g__norank_c__SAR202_clade;s__uncultured_Thermomicrobium_sp._g__norank
OTU414	0	0	1	1	0	0	1	1	0	0	0	d__Bacteria;k__norank;p__Chloroflexi;c__SAR202_clade;o__norank_c__SAR202_clade;f__norank_c__SAR202_clade;g__norank_c__SAR202_clade;s__hydrothermal_vent_metagenome_g__norank_c__SAR202_clade
OTU415	0	0	0	1	0	0	0	0	0	0	0	d__Bacteria;k__norank;p__Chloroflexi;c__JG30-KF-CM66;o__norank_c__JG30-KF-CM66;f__norank_c__JG30-KF-CM66;g__norank_c__JG30-KF-CM66;s__uncultured_bacterium_g__norank_c__JG30-KF-CM66
OTU416	0	0	0	1	0	0	1	1	0	0	0	d__Bacteria;k__norank;p__Gemmatimonadetes;c__Gemmatimonadetes;o__norank_c__Gemmatimonadetes;f__norank_c__Gemmatimonadetes;g__norank_c__Gemmatimonadetes;s__uncultured_deep-sea_bacterium_g__norank_c__Gemmatimonadetes
OTU417	0	1	1	1	0	1	1	1	0	0	0	d__Bacteria;k__norank;p__Proteobacteria;c__Deltaproteobacteria;o__Bradymonadales;f__norank_o__Bradymonadales;g__norank_o__Bradymonadales;s__unclassified_g__norank_o__Bradymonadales
OTU418	0	0	0	1	1	1	1	1	1	0	0	d__Bacteria;k__norank;p__Bacteroidetes;c__Flavobacteriia;o__Flavobacteriales;f__Flavobacteriaceae;g__Leeuwenhoekiella;s__Leeuwenhoekiella_blandensis_MED217
OTU419	1	1	1	1	1	1	1	1	1	1	1	d__Bacteria;k__norank;p__Proteobacteria;c__Gammaproteobacteria;o__Pseudomonadales;f__Moraxellaceae;g__Acinetobacter;s__Acinetobacter_venetianus_RAG-1__CIP_110063
OTU420	0	0	1	1	0	0	1	1	0	0	0	d__Bacteria;k__norank;p__Nitrospinae;c__Nitrospinia;o__Nitrospinales;f__Nitrospinaceae;g__Nitrospina;s__unclassified_g__Nitrospina
OTU421	0	0	1	1	0	0	1	1	0	0	0	d__Bacteria;k__norank;p__Chloroflexi;c__SAR202_clade;o__norank_c__SAR202_clade;f__norank_c__SAR202_clade;g__norank_c__SAR202_clade;s__unclassified_g__norank_c__SAR202_clade
OTU422	0	0	0	1	0	0	0	0	0	0	0	d__Bacteria;k__norank;p__Chloroflexi;c__JG30-KF-CM66;o__norank_c__JG30-KF-CM66;f__norank_c__JG30-KF-CM66;g__norank_c__JG30-KF-CM66;s__uncultured_bacterium_g__norank_c__JG30-KF-CM66
OTU423	0	0	0	1	0	0	0	0	0	0	0	d__Bacteria;k__norank;p__Bacteroidetes;c__Bacteroidetes_Incertae_Sedis;o__Order_II;f__Rhodothermaceae;g__Rubricoccus;s__Rubricoccus_marinus
OTU424	0	0	1	1	0	0	1	1	0	0	0	d__Bacteria;k__norank;p__Gemmatimonadetes;c__Gemmatimonadetes;o__norank_c__Gemmatimonadetes;f__norank_c__Gemmatimonadetes;g__norank_c__Gemmatimonadetes;s__uncultured_nuHF2_cluster_bacterium_HF0500_02A10
OTU425	0	0	1	1	0	0	1	1	0	0	0	d__Bacteria;k__norank;p__Nitrospinae;c__MD2896-B214;o__norank_c__MD2896-B214;f__norank_c__MD2896-B214;g__norank_c__MD2896-B214;s__uncultured_proteobacterium_g__norank_c__MD2896-B214
OTU426	1	1	1	1	0	1	1	1	0	0	0	d__Bacteria;k__norank;p__Actinobacteria;c__Actinobacteria;o__Acidimicrobiales;f__Sva0996_marine_group;g__norank_f__Sva0996_marine_group;s__unclassified_g__norank_f__Sva0996_marine_group
OTU427	0	0	0	1	0	0	0	0	0	0	0	d__Bacteria;k__norank;p__Chloroflexi;c__S085;o__norank_c__S085;f__norank_c__S085;g__norank_c__S085;s__uncultured_bacterium_g__norank_c__S085
OTU428	1	1	1	1	1	1	1	1	1	1	1	d__Bacteria;k__norank;p__Proteobacteria;c__Gammaproteobacteria;o__Alteromonadales;f__Alteromonadaceae;g__Alteromonas;s__unclassified_g__Alteromonas
OTU429	0	0	0	1	0	0	0	0	0	0	0	d__Bacteria;k__norank;p__unclassified_k__norank;c__unclassified_k__norank;o__unclassified_k__norank;f__unclassified_k__norank;g__unclassified_k__norank;s__unclassified_k__norank
OTU430	0	0	0	1	0	0	0	0	0	0	0	d__Bacteria;k__norank;p__Firmicutes;c__Bacilli;o__Bacillales;f__Staphylococcaceae;g__Staphylococcus;s__Staphylococcus_sciuri_subsp._sciuri
OTU431	1	0	1	1	0	0	1	1	0	1	1	d__Bacteria;k__norank;p__Proteobacteria;c__Gammaproteobacteria;o__Oceanospirillales;f__Halomonadaceae;g__Chromohalobacter;s__uncultured_proteobacterium_g__Chromohalobacter
OTU432	0	0	0	1	0	0	0	1	0	0	0	d__Bacteria;k__norank;p__Planctomycetes;c__Pla3_lineage;o__norank_c__Pla3_lineage;f__norank_c__Pla3_lineage;g__norank_c__Pla3_lineage;s__hydrothermal_vent_metagenome_g__norank_c__Pla3_lineage
OTU433	0	0	0	1	0	0	1	1	1	1	1	d__Bacteria;k__norank;p__Proteobacteria;c__Gammaproteobacteria;o__Alteromonadales;f__Idiomarinaceae;g__Idiomarina;s__Idiomarina_baltica
OTU434	0	0	1	1	0	0	1	1	0	0	0	d__Bacteria;k__norank;p__Chloroflexi;c__TK10;o__norank_c__TK10;f__norank_c__TK10;g__norank_c__TK10;s__marine_metagenome_g__norank_c__TK10
OTU435	0	1	0	1	0	0	0	1	0	0	0	d__Bacteria;k__norank;p__Proteobacteria;c__Betaproteobacteria;o__Burkholderiales;f__Burkholderiaceae;g__Ralstonia;s__unclassified_g__Ralstonia
OTU436	0	0	1	1	0	0	1	1	0	0	0	d__Bacteria;k__norank;p__Proteobacteria;c__Gammaproteobacteria;o__Xanthomonadales;f__norank_o__Xanthomonadales;g__norank_o__Xanthomonadales;s__uncultured_gamma_proteobacterium_g__norank_o__Xanthomonadales
OTU437	0	1	0	1	1	0	1	1	1	1	1	d__Bacteria;k__norank;p__Proteobacteria;c__Gammaproteobacteria;o__Oceanospirillales;f__Alcanivoracaceae;g__Alcanivorax;s__Alcanivorax_venustensis
OTU438	0	0	1	1	0	0	1	1	0	0	0	d__Bacteria;k__norank;p__Chloroflexi;c__SAR202_clade;o__norank_c__SAR202_clade;f__norank_c__SAR202_clade;g__norank_c__SAR202_clade;s__uncultured_Chloroflexi_bacterium_g__norank_c__SAR202_clade
OTU439	0	0	0	1	0	0	0	1	0	0	1	d__Bacteria;k__norank;p__Actinobacteria;c__Actinobacteria;o__Micrococcales;f__Microbacteriaceae;g__Microbacterium;s__Microbacterium_aquimaris
OTU440	0	1	0	1	0	0	0	0	0	0	0	d__Bacteria;k__norank;p__Bacteroidetes;c__Flavobacteriia;o__Flavobacteriales;f__Flavobacteriaceae;g__Flavobacterium;s__Flavobacteriaceae_bacterium_NHD080
OTU441	0	0	1	1	0	0	1	1	0	0	0	d__Bacteria;k__norank;p__Marinimicrobia__SAR406_clade_;c__norank_p__Marinimicrobia__SAR406_clade_;o__norank_p__Marinimicrobia__SAR406_clade_;f__norank_p__Marinimicrobia__SAR406_clade_;g__norank_p__Marinimicrobia__SAR406_clade_;s__uncultured_bacterium_405006-B04
OTU442	0	0	0	1	0	0	1	0	0	0	0	d__Bacteria;k__norank;p__Chloroflexi;c__SAR202_clade;o__norank_c__SAR202_clade;f__norank_c__SAR202_clade;g__norank_c__SAR202_clade;s__unclassified_g__norank_c__SAR202_clade
OTU443	0	0	1	1	0	0	1	1	0	0	0	d__Bacteria;k__norank;p__Proteobacteria;c__Gammaproteobacteria;o__Methylococcales;f__IheB2-23;g__norank_f__IheB2-23;s__uncultured_bacterium_g__norank_f__IheB2-23
OTU444	0	0	1	1	0	0	1	1	0	0	0	d__Bacteria;k__norank;p__Verrucomicrobia;c__Verrucomicrobiae;o__Verrucomicrobiales;f__Verrucomicrobiaceae;g__Roseibacillus;s__uncultured_verrucomicrobium_HF0500_18J03
OTU445	0	0	0	1	0	0	0	0	0	0	0	d__Bacteria;k__norank;p__Firmicutes;c__Bacilli;o__Lactobacillales;f__Lactobacillaceae;g__Lactobacillus;s__Lactobacillus_acetotolerans
OTU446	0	0	1	1	0	0	1	1	0	0	0	d__Bacteria;k__norank;p__Acidobacteria;c__Acidobacteria;o__norank_c__Acidobacteria;f__norank_c__Acidobacteria;g__norank_c__Acidobacteria;s__uncultured_bacterium_AD106-G4
OTU447	0	0	1	1	0	0	1	1	0	0	0	d__Bacteria;k__norank;p__Planctomycetes;c__Phycisphaerae;o__Phycisphaerales;f__Phycisphaeraceae;g__CL500-3;s__uncultured_bacterium_g__CL500-3
OTU448	0	0	0	1	0	0	0	0	0	0	0	d__Bacteria;k__norank;p__Proteobacteria;c__Betaproteobacteria;o__Burkholderiales;f__Oxalobacteraceae;g__unclassified_f__Oxalobacteraceae;s__unclassified_f__Oxalobacteraceae
OTU449	0	0	0	1	0	0	1	1	0	0	0	d__Bacteria;k__norank;p__Proteobacteria;c__Gammaproteobacteria;o__Salinisphaerales;f__Salinisphaeraceae;g__Salinisphaera;s__uncultured_Salinisphaera_sp.
OTU450	0	0	1	1	0	0	1	1	0	0	0	d__Bacteria;k__norank;p__Proteobacteria;c__Gammaproteobacteria;o__Xanthomonadales;f__norank_o__Xanthomonadales;g__norank_o__Xanthomonadales;s__unclassified_g__norank_o__Xanthomonadales
OTU451	0	1	0	1	0	0	0	1	0	0	0	d__Bacteria;k__norank;p__Proteobacteria;c__Gammaproteobacteria;o__Chromatiales;f__Chromatiaceae;g__Rheinheimera;s__Rheinheimera_aquimaris
OTU452	0	0	0	1	0	0	0	0	0	0	0	d__Bacteria;k__norank;p__Chloroflexi;c__S085;o__norank_c__S085;f__norank_c__S085;g__norank_c__S085;s__unclassified_g__norank_c__S085
OTU453	0	0	0	1	0	1	0	1	0	0	1	d__Bacteria;k__norank;p__Proteobacteria;c__Gammaproteobacteria;o__Oceanospirillales;f__Halomonadaceae;g__Salinicola;s__unclassified_g__Salinicola
OTU454	1	0	1	1	0	0	1	1	0	0	0	d__Bacteria;k__norank;p__Chloroflexi;c__SAR202_clade;o__norank_c__SAR202_clade;f__norank_c__SAR202_clade;g__norank_c__SAR202_clade;s__hydrothermal_vent_metagenome_g__norank_c__SAR202_clade
OTU455	0	0	0	1	0	0	0	0	0	0	0	d__Bacteria;k__norank;p__Saccharibacteria;c__norank_p__Saccharibacteria;o__norank_p__Saccharibacteria;f__norank_p__Saccharibacteria;g__norank_p__Saccharibacteria;s__unclassified_g__norank_p__Saccharibacteria
OTU456	0	0	1	1	0	0	1	1	0	0	0	d__Bacteria;k__norank;p__Gemmatimonadetes;c__Gemmatimonadetes;o__norank_c__Gemmatimonadetes;f__norank_c__Gemmatimonadetes;g__norank_c__Gemmatimonadetes;s__uncultured_deep-sea_bacterium_g__norank_c__Gemmatimonadetes
OTU457	0	0	1	1	0	0	1	1	0	0	0	d__Bacteria;k__norank;p__Proteobacteria;c__Gammaproteobacteria;o__Xanthomonadales;f__JTB255_marine_benthic_group;g__norank_f__JTB255_marine_benthic_group;s__unclassified_g__norank_f__JTB255_marine_benthic_group
OTU458	0	0	0	1	0	0	0	0	0	0	0	d__Bacteria;k__norank;p__Firmicutes;c__Bacilli;o__Lactobacillales;f__Lactobacillaceae;g__Lactobacillus;s__unclassified_g__Lactobacillus
OTU459	1	1	1	1	1	1	1	1	1	1	1	d__Bacteria;k__norank;p__Proteobacteria;c__Gammaproteobacteria;o__Alteromonadales;f__Pseudoalteromonadaceae;g__Pseudoalteromonas;s__uncultured_organism_g__Pseudoalteromonas
OTU460	1	1	1	1	1	1	1	1	1	1	1	d__Bacteria;k__norank;p__Proteobacteria;c__Gammaproteobacteria;o__Oceanospirillales;f__Halomonadaceae;g__Halomonas;s__unclassified_g__Halomonas
OTU461	1	1	0	1	1	1	1	1	0	0	0	d__Bacteria;k__norank;p__Proteobacteria;c__Gammaproteobacteria;o__Pseudomonadales;f__Pseudomonadaceae;g__Pseudomonas;s__unclassified_g__Pseudomonas
OTU462	0	0	0	1	0	0	0	0	0	0	0	d__Bacteria;k__norank;p__Firmicutes;c__Bacilli;o__Lactobacillales;f__Enterococcaceae;g__Enterococcus;s__unclassified_g__Enterococcus
OTU463	0	0	0	1	1	1	1	1	0	1	1	d__Bacteria;k__norank;p__Proteobacteria;c__Gammaproteobacteria;o__Pseudomonadales;f__Pseudomonadaceae;g__Pseudomonas;s__Pseudomonas_pachastrellae
OTU464	1	0	1	1	0	0	1	1	1	1	1	d__Bacteria;k__norank;p__Proteobacteria;c__Gammaproteobacteria;o__Thiotrichales;f__Thiotrichales_Incertae_Sedis;g__Candidatus_Endoecteinascidia;s__uncultured_gamma_proteobacterium_g__Candidatus_Endoecteinascidia
OTU465	0	0	1	1	0	0	1	1	0	0	0	d__Bacteria;k__norank;p__Chloroflexi;c__SAR202_clade;o__norank_c__SAR202_clade;f__norank_c__SAR202_clade;g__norank_c__SAR202_clade;s__uncultured_deep-sea_bacterium_g__norank_c__SAR202_clade
OTU466	0	0	0	1	0	0	0	1	0	0	0	d__Bacteria;k__norank;p__Bacteroidetes;c__unclassified_p__Bacteroidetes;o__unclassified_p__Bacteroidetes;f__unclassified_p__Bacteroidetes;g__unclassified_p__Bacteroidetes;s__unclassified_p__Bacteroidetes
OTU467	0	0	0	1	0	0	0	0	0	0	0	d__Bacteria;k__norank;p__Firmicutes;c__Bacilli;o__Lactobacillales;f__Lactobacillaceae;g__Pediococcus;s__Pediococcus_ethanolidurans
OTU468	0	0	1	1	0	0	1	1	0	0	0	d__Bacteria;k__norank;p__Marinimicrobia__SAR406_clade_;c__norank_p__Marinimicrobia__SAR406_clade_;o__norank_p__Marinimicrobia__SAR406_clade_;f__norank_p__Marinimicrobia__SAR406_clade_;g__norank_p__Marinimicrobia__SAR406_clade_;s__uncultured_marine_microorganism_g__norank_p__Marinimicrobia__SAR406_clade_
OTU469	1	1	1	1	0	0	1	1	0	0	0	d__Bacteria;k__norank;p__Proteobacteria;c__Betaproteobacteria;o__Burkholderiales;f__Burkholderiaceae;g__Ralstonia;s__Ralstonia_pickettii_g__Ralstonia
OTU470	0	0	0	1	0	0	1	1	0	0	0	d__Bacteria;k__norank;p__Chloroflexi;c__SAR202_clade;o__norank_c__SAR202_clade;f__norank_c__SAR202_clade;g__norank_c__SAR202_clade;s__uncultured_bacterium_g__norank_c__SAR202_clade
OTU471	0	0	1	1	0	0	0	1	0	0	0	d__Bacteria;k__norank;p__Acidobacteria;c__Acidobacteria;o__norank_c__Acidobacteria;f__norank_c__Acidobacteria;g__norank_c__Acidobacteria;s__unclassified_g__norank_c__Acidobacteria
OTU472	0	0	0	1	0	0	0	0	0	0	0	d__Bacteria;k__norank;p__Nitrospirae;c__Nitrospira;o__norank_c__Nitrospira;f__norank_c__Nitrospira;g__Nitrospira;s__unclassified_g__Nitrospira
OTU473	0	0	1	1	0	0	1	1	0	0	0	d__Bacteria;k__norank;p__Chloroflexi;c__SAR202_clade;o__norank_c__SAR202_clade;f__norank_c__SAR202_clade;g__norank_c__SAR202_clade;s__uncultured_Thermomicrobium_sp._g__norank
OTU474	0	0	0	1	0	0	0	0	0	0	0	d__Bacteria;k__norank;p__Actinobacteria;c__Actinobacteria;o__Acidimicrobiales;f__OM1_clade;g__norank_f__OM1_clade;s__uncultured_actinobacterium_g__norank_f__OM1_clade
OTU475	0	0	1	1	0	0	1	1	0	0	0	d__Bacteria;k__norank;p__Chloroflexi;c__SAR202_clade;o__norank_c__SAR202_clade;f__norank_c__SAR202_clade;g__norank_c__SAR202_clade;s__marine_metagenome_g__norank_c__SAR202_clade
OTU476	0	0	1	1	0	0	0	1	0	0	0	d__Bacteria;k__norank;p__Marinimicrobia__SAR406_clade_;c__norank_p__Marinimicrobia__SAR406_clade_;o__norank_p__Marinimicrobia__SAR406_clade_;f__norank_p__Marinimicrobia__SAR406_clade_;g__norank_p__Marinimicrobia__SAR406_clade_;s__uncultured_bacterium_413004-H17
OTU477	0	0	1	1	0	0	1	1	0	0	0	d__Bacteria;k__norank;p__Chloroflexi;c__SAR202_clade;o__norank_c__SAR202_clade;f__norank_c__SAR202_clade;g__norank_c__SAR202_clade;s__uncultured_marine_microorganism_g__norank_c__SAR202_clade
OTU478	0	0	1	1	0	1	0	0	0	0	0	d__Bacteria;k__norank;p__Proteobacteria;c__Deltaproteobacteria;o__Bradymonadales;f__norank_o__Bradymonadales;g__norank_o__Bradymonadales;s__uncultured_delta_proteobacterium_g__norank_o__Bradymonadales
OTU479	0	0	0	1	0	0	0	0	0	0	0	d__Bacteria;k__norank;p__Chloroflexi;c__SAR202_clade;o__norank_c__SAR202_clade;f__norank_c__SAR202_clade;g__norank_c__SAR202_clade;s__uncultured_bacterium_g__norank_c__SAR202_clade
OTU480	0	0	0	1	0	0	0	0	0	0	0	d__Bacteria;k__norank;p__Proteobacteria;c__Gammaproteobacteria;o__Oceanospirillales;f__Halomonadaceae;g__unclassified_f__Halomonadaceae;s__unclassified_f__Halomonadaceae
OTU481	0	1	1	1	0	0	0	0	0	0	0	d__Bacteria;k__norank;p__Proteobacteria;c__Gammaproteobacteria;o__Pseudomonadales;f__Moraxellaceae;g__Acinetobacter;s__Acinetobacter_sp._ADP1
OTU482	0	0	0	1	0	0	0	1	0	0	0	d__Bacteria;k__norank;p__Planctomycetes;c__Phycisphaerae;o__Phycisphaerales;f__Phycisphaeraceae;g__norank_f__Phycisphaeraceae;s__unclassified_g__norank_f__Phycisphaeraceae
OTU483	0	0	0	1	1	0	0	1	0	0	0	d__Bacteria;k__norank;p__Saccharibacteria;c__norank_p__Saccharibacteria;o__norank_p__Saccharibacteria;f__norank_p__Saccharibacteria;g__norank_p__Saccharibacteria;s__unclassified_g__norank_p__Saccharibacteria
OTU484	1	0	1	1	0	0	1	1	0	1	1	d__Bacteria;k__norank;p__Chloroflexi;c__SAR202_clade;o__norank_c__SAR202_clade;f__norank_c__SAR202_clade;g__norank_c__SAR202_clade;s__hydrothermal_vent_metagenome_g__norank_c__SAR202_clade
OTU485	0	0	1	1	0	0	1	1	0	0	0	d__Bacteria;k__norank;p__Gemmatimonadetes;c__Gemmatimonadetes;o__norank_c__Gemmatimonadetes;f__norank_c__Gemmatimonadetes;g__norank_c__Gemmatimonadetes;s__Gemmatimonadetes_bacterium_SCGC_AAA240-J22
OTU486	0	0	0	1	0	0	0	0	0	0	0	d__Bacteria;k__norank;p__Actinobacteria;c__Actinobacteria;o__Acidimicrobiales;f__OM1_clade;g__norank_f__OM1_clade;s__unclassified_g__norank_f__OM1_clade
OTU487	0	0	0	1	0	0	0	0	0	0	0	d__Bacteria;k__norank;p__Actinobacteria;c__Actinobacteria;o__Acidimicrobiales;f__OM1_clade;g__norank_f__OM1_clade;s__unclassified_g__norank_f__OM1_clade
OTU488	0	0	1	1	0	0	1	1	0	0	0	d__Bacteria;k__norank;p__Actinobacteria;c__Actinobacteria;o__Acidimicrobiales;f__Sva0996_marine_group;g__norank_f__Sva0996_marine_group;s__uncultured_Acidimicrobineae_bacterium_g__norank_f__Sva0996_marine_group
OTU489	0	0	0	1	0	0	1	1	0	0	0	d__Bacteria;k__norank;p__Cyanobacteria;c__Cyanobacteria;o__norank_c__Cyanobacteria;f__norank_c__Cyanobacteria;g__norank_c__Cyanobacteria;s__unclassified_g__norank_c__Cyanobacteria
OTU490	1	0	0	0	0	0	0	0	0	0	0	d__Bacteria;k__norank;p__Proteobacteria;c__Epsilonproteobacteria;o__Campylobacterales;f__Helicobacteraceae;g__Sulfurimonas;s__unclassified_g__Sulfurimonas
OTU491	1	0	0	0	1	0	0	0	0	0	0	d__Bacteria;k__norank;p__Proteobacteria;c__Gammaproteobacteria;o__X35;f__norank_o__X35;g__norank_o__X35;s__uncultured_marine_bacterium_g__norank_o__X35
OTU492	1	0	0	0	1	0	0	0	0	0	0	d__Bacteria;k__norank;p__Proteobacteria;c__Alphaproteobacteria;o__4-Org1-14;f__norank_o__4-Org1-14;g__norank_o__4-Org1-14;s__uncultured_alpha_proteobacterium_g__norank_o__4-Org1-14
OTU493	1	1	0	0	1	0	1	0	1	0	0	d__Bacteria;k__norank;p__Proteobacteria;c__Alphaproteobacteria;o__Rhodobacterales;f__Rhodobacteraceae;g__unclassified_f__Rhodobacteraceae;s__unclassified_f__Rhodobacteraceae
OTU494	1	1	0	1	1	1	1	1	1	1	0	d__Bacteria;k__norank;p__Proteobacteria;c__Gammaproteobacteria;o__Alteromonadales;f__Pseudoalteromonadaceae;g__Pseudoalteromonas;s__unclassified_g__Pseudoalteromonas
OTU495	1	0	0	0	1	0	0	0	0	1	0	d__Bacteria;k__norank;p__Bacteroidetes;c__Flavobacteriia;o__Flavobacteriales;f__Cryomorphaceae;g__norank_f__Cryomorphaceae;s__uncultured_bacterium_g__norank_f__Cryomorphaceae
OTU496	1	0	0	0	1	0	0	0	1	1	1	d__Bacteria;k__norank;p__Planctomycetes;c__OM190;o__norank_c__OM190;f__norank_c__OM190;g__norank_c__OM190;s__uncultured_marine_bacterium_g__norank_c__OM190
OTU497	1	0	0	0	0	0	0	0	1	0	0	d__Bacteria;k__norank;p__Proteobacteria;c__Alphaproteobacteria;o__Rhodospirillales;f__Rhodospirillaceae;g__Terasakiella;s__uncultured_bacterium_g__Terasakiella
OTU498	1	0	0	0	0	0	0	0	0	0	1	d__Bacteria;k__norank;p__Proteobacteria;c__Gammaproteobacteria;o__unclassified_c__Gammaproteobacteria;f__unclassified_c__Gammaproteobacteria;g__unclassified_c__Gammaproteobacteria;s__unclassified_c__Gammaproteobacteria
OTU499	1	0	0	0	1	0	0	0	1	1	0	d__Bacteria;k__norank;p__Proteobacteria;c__Gammaproteobacteria;o__Cellvibrionales;f__Spongiibacteraceae;g__norank_f__Spongiibacteraceae;s__uncultured_Spongiibacter_sp.
OTU500	1	0	0	0	0	0	0	0	0	0	0	d__Bacteria;k__norank;p__Proteobacteria;c__Deltaproteobacteria;o__Bdellovibrionales;f__Bacteriovoracaceae;g__Peredibacter;s__unclassified_g__Peredibacter
OTU501	1	0	0	0	0	0	0	0	1	0	0	d__Bacteria;k__norank;p__Proteobacteria;c__Gammaproteobacteria;o__Cellvibrionales;f__Cellvibrionaceae;g__unclassified_f__Cellvibrionaceae;s__unclassified_f__Cellvibrionaceae
OTU502	1	0	0	0	1	0	0	0	1	1	1	d__Bacteria;k__norank;p__Proteobacteria;c__Betaproteobacteria;o__Methylophilales;f__Methylophilaceae;g__OM43_clade;s__unclassified_g__OM43_clade
OTU503	1	0	0	0	0	0	0	0	0	0	0	d__Bacteria;k__norank;p__Proteobacteria;c__Gammaproteobacteria;o__Oceanospirillales;f__MBAE14;g__norank_f__MBAE14;s__unclassified_g__norank_f__MBAE14
OTU504	1	1	0	0	0	0	1	0	0	0	0	d__Bacteria;k__norank;p__Proteobacteria;c__Gammaproteobacteria;o__Legionellales;f__Legionellaceae;g__Legionella;s__unclassified_g__Legionella
OTU505	1	0	0	0	0	1	0	0	1	0	0	d__Bacteria;k__norank;p__Bacteroidetes;c__Cytophagia;o__Cytophagales;f__Flammeovirgaceae;g__unclassified_f__Flammeovirgaceae;s__unclassified_f__Flammeovirgaceae
OTU506	1	1	0	0	1	1	0	0	1	1	1	d__Bacteria;k__norank;p__Proteobacteria;c__Gammaproteobacteria;o__Oceanospirillales;f__OM182_clade;g__norank_f__OM182_clade;s__uncultured_marine_bacterium_g__norank_f__OM182_clade
OTU507	1	0	0	0	1	0	0	0	1	1	1	d__Bacteria;k__norank;p__Proteobacteria;c__Deltaproteobacteria;o__Bradymonadales;f__norank_o__Bradymonadales;g__norank_o__Bradymonadales;s__unclassified_g__norank_o__Bradymonadales
OTU508	1	0	0	1	1	1	0	1	1	1	1	d__Bacteria;k__norank;p__Proteobacteria;c__Alphaproteobacteria;o__Rhodobacterales;f__Rhodobacteraceae;g__unclassified_f__Rhodobacteraceae;s__unclassified_f__Rhodobacteraceae
OTU509	1	1	1	1	1	1	0	0	1	1	1	d__Bacteria;k__norank;p__Proteobacteria;c__Deltaproteobacteria;o__Bradymonadales;f__norank_o__Bradymonadales;g__norank_o__Bradymonadales;s__uncultured_delta_proteobacterium_DeepAnt-1F12
OTU510	1	0	0	0	1	0	0	1	0	0	0	d__Bacteria;k__norank;p__Proteobacteria;c__Gammaproteobacteria;o__Xanthomonadales;f__Solimonadaceae;g__Polycyclovorans;s__uncultured_Solimonas_sp._g__Polycyclovorans
OTU511	1	1	0	0	1	1	1	1	1	1	1	d__Bacteria;k__norank;p__Cyanobacteria;c__Cyanobacteria;o__norank_c__Cyanobacteria;f__norank_c__Cyanobacteria;g__norank_c__Cyanobacteria;s__unclassified_g__norank_c__Cyanobacteria
OTU512	1	0	0	0	1	0	0	0	1	0	0	d__Bacteria;k__norank;p__Proteobacteria;c__unclassified_p__Proteobacteria;o__unclassified_p__Proteobacteria;f__unclassified_p__Proteobacteria;g__unclassified_p__Proteobacteria;s__unclassified_p__Proteobacteria
OTU513	1	0	0	1	1	0	0	0	1	0	1	d__Bacteria;k__norank;p__Proteobacteria;c__Gammaproteobacteria;o__unclassified_c__Gammaproteobacteria;f__unclassified_c__Gammaproteobacteria;g__unclassified_c__Gammaproteobacteria;s__unclassified_c__Gammaproteobacteria
OTU514	1	0	0	0	1	0	0	0	0	0	0	d__Bacteria;k__norank;p__Proteobacteria;c__Gammaproteobacteria;o__Oceanospirillales;f__Oleiphilaceae;g__Oleiphilus;s__Oleiphilus_messinensis
OTU515	1	0	0	0	1	0	0	0	0	0	0	d__Bacteria;k__norank;p__Proteobacteria;c__Gammaproteobacteria;o__Legionellales;f__Coxiellaceae;g__Coxiella;s__uncultured_bacterium_g__Coxiella
OTU516	1	1	1	0	1	1	0	1	1	1	1	d__Bacteria;k__norank;p__Proteobacteria;c__Gammaproteobacteria;o__Oceanospirillales;f__Litoricolaceae;g__Litoricola;s__uncultured_bacterium_g__Litoricola
OTU517	1	0	0	0	1	0	0	0	1	1	1	d__Bacteria;k__norank;p__Planctomycetes;c__unclassified_p__Planctomycetes;o__unclassified_p__Planctomycetes;f__unclassified_p__Planctomycetes;g__unclassified_p__Planctomycetes;s__unclassified_p__Planctomycetes
OTU518	1	0	0	0	1	0	0	0	1	1	1	d__Bacteria;k__norank;p__Proteobacteria;c__Gammaproteobacteria;o__Oceanospirillales;f__Oceanospirillaceae;g__Pseudohongiella;s__unclassified_g__Pseudohongiella
OTU519	1	0	0	0	1	0	1	0	1	1	0	d__Bacteria;k__norank;p__Proteobacteria;c__Alphaproteobacteria;o__Parvularculales;f__Parvularculaceae;g__norank_f__Parvularculaceae;s__unclassified_g__norank_f__Parvularculaceae
OTU520	1	0	0	0	1	0	0	0	1	1	1	d__Bacteria;k__norank;p__Cyanobacteria;c__Cyanobacteria;o__norank_c__Cyanobacteria;f__norank_c__Cyanobacteria;g__norank_c__Cyanobacteria;s__unclassified_g__norank_c__Cyanobacteria
OTU521	1	0	0	0	1	0	0	0	1	1	0	d__Bacteria;k__norank;p__Proteobacteria;c__Alphaproteobacteria;o__Rhodobacterales;f__Rhodobacteraceae;g__Defluviimonas;s__unclassified_g__Defluviimonas
OTU522	1	0	1	0	0	0	0	0	0	0	0	d__Bacteria;k__norank;p__Proteobacteria;c__Gammaproteobacteria;o__Oceanospirillales;f__Oceanospirillaceae;g__Marinobacterium;s__unclassified_g__Marinobacterium
OTU523	1	0	1	0	0	0	1	1	0	0	0	d__Bacteria;k__norank;p__Proteobacteria;c__Gammaproteobacteria;o__Alteromonadales;f__Colwelliaceae;g__Colwellia;s__unclassified_g__Colwellia
OTU524	1	1	0	0	0	0	0	0	0	1	1	d__Bacteria;k__norank;p__Proteobacteria;c__Deltaproteobacteria;o__Bdellovibrionales;f__Bdellovibrionaceae;g__OM27_clade;s__uncultured_delta_proteobacterium_g__OM27_clade
OTU525	1	0	0	1	1	0	0	0	1	1	1	d__Bacteria;k__norank;p__Proteobacteria;c__Deltaproteobacteria;o__Bdellovibrionales;f__Bdellovibrionaceae;g__OM27_clade;s__unclassified_g__OM27_clade
OTU526	1	0	0	0	1	0	0	0	0	0	0	d__Bacteria;k__norank;p__Proteobacteria;c__Gammaproteobacteria;o__Alteromonadales;f__Colwelliaceae;g__Thalassotalea;s__unclassified_g__Thalassotalea
OTU527	1	0	0	0	0	0	0	0	0	0	1	d__Bacteria;k__norank;p__Proteobacteria;c__Gammaproteobacteria;o__Cellvibrionales;f__Spongiibacteraceae;g__BD1-7_clade;s__uncultured_gamma_proteobacterium_g__BD1-7_clade
OTU528	1	0	0	0	0	0	0	0	0	0	0	d__Bacteria;k__norank;p__Bacteroidetes;c__Flavobacteriia;o__Flavobacteriales;f__Flavobacteriaceae;g__Lutibacter;s__unclassified_g__Lutibacter
OTU529	1	1	0	0	1	1	1	0	1	1	1	d__Bacteria;k__norank;p__Gemmatimonadetes;c__Gemmatimonadetes;o__norank_c__Gemmatimonadetes;f__norank_c__Gemmatimonadetes;g__norank_c__Gemmatimonadetes;s__uncultured_marine_microorganism_g__norank_c__Gemmatimonadetes
OTU530	1	0	0	0	1	1	0	0	1	1	1	d__Bacteria;k__norank;p__Planctomycetes;c__OM190;o__norank_c__OM190;f__norank_c__OM190;g__norank_c__OM190;s__uncultured_marine_bacterium_g__norank_c__OM190
OTU531	1	0	0	0	1	1	0	0	1	1	1	d__Bacteria;k__norank;p__Proteobacteria;c__Gammaproteobacteria;o__Legionellales;f__Coxiellaceae;g__Coxiella;s__uncultured_gamma_proteobacterium_KTc0924
OTU532	1	0	0	0	1	0	0	0	1	0	0	d__Bacteria;k__norank;p__Proteobacteria;c__Gammaproteobacteria;o__PYR10d3;f__norank_o__PYR10d3;g__norank_o__PYR10d3;s__unclassified_g__norank_o__PYR10d3
OTU533	1	0	0	0	1	0	0	0	0	0	0	d__Bacteria;k__norank;p__Proteobacteria;c__Alphaproteobacteria;o__Sphingomonadales;f__unclassified_o__Sphingomonadales;g__unclassified_o__Sphingomonadales;s__unclassified_o__Sphingomonadales
OTU534	1	1	0	0	1	0	0	0	1	1	1	d__Bacteria;k__norank;p__Cyanobacteria;c__Cyanobacteria;o__norank_c__Cyanobacteria;f__norank_c__Cyanobacteria;g__norank_c__Cyanobacteria;s__unclassified_g__norank_c__Cyanobacteria
OTU535	1	0	0	1	0	0	1	1	0	0	0	d__Bacteria;k__norank;p__Proteobacteria;c__Alphaproteobacteria;o__Caulobacterales;f__Hyphomonadaceae;g__Maricaulis;s__unclassified_g__Maricaulis
OTU536	1	0	0	0	1	0	0	0	0	0	0	d__Bacteria;k__norank;p__Proteobacteria;c__Alphaproteobacteria;o__unclassified_c__Alphaproteobacteria;f__unclassified_c__Alphaproteobacteria;g__unclassified_c__Alphaproteobacteria;s__unclassified_c__Alphaproteobacteria
OTU537	1	0	0	0	0	0	0	0	0	0	1	d__Bacteria;k__norank;p__Firmicutes;c__Clostridia;o__Clostridiales;f__Ruminococcaceae;g__Ruminococcaceae_UCG-008;s__uncultured_bacterium_g__Ruminococcaceae_UCG-008
OTU538	1	1	0	0	1	0	0	0	1	1	1	d__Bacteria;k__norank;p__Proteobacteria;c__Gammaproteobacteria;o__Oceanospirillales;f__Litoricolaceae;g__Litoricola;s__uncultured_gamma_proteobacterium_g__Litoricola
OTU539	1	1	0	0	1	1	0	0	1	1	1	d__Bacteria;k__norank;p__Bacteroidetes;c__Flavobacteriia;o__Flavobacteriales;f__Flavobacteriaceae;g__NS5_marine_group;s__unclassified_g__NS5_marine_group
OTU540	1	0	0	0	1	0	0	0	1	1	0	d__Bacteria;k__norank;p__Proteobacteria;c__Gammaproteobacteria;o__Cellvibrionales;f__Porticoccaceae;g__C1-B045;s__uncultured_bacterium_g__C1-B045
OTU541	1	1	0	0	1	0	0	0	1	1	1	d__Bacteria;k__norank;p__Proteobacteria;c__Gammaproteobacteria;o__Oceanospirillales;f__Oceanospirillaceae;g__Pseudohongiella;s__unclassified_g__Pseudohongiella
OTU542	1	0	0	1	1	0	0	0	0	1	1	d__Bacteria;k__norank;p__Bacteroidetes;c__Flavobacteriia;o__Flavobacteriales;f__Flavobacteriaceae;g__Aureimarina;s__unclassified_g__Aureimarina
OTU543	1	0	0	0	1	0	0	0	0	0	0	d__Bacteria;k__norank;p__Proteobacteria;c__Gammaproteobacteria;o__unclassified_c__Gammaproteobacteria;f__unclassified_c__Gammaproteobacteria;g__unclassified_c__Gammaproteobacteria;s__unclassified_c__Gammaproteobacteria
OTU544	1	1	1	0	1	1	1	0	1	1	1	d__Bacteria;k__norank;p__Actinobacteria;c__Actinobacteria;o__Acidimicrobiales;f__Sva0996_marine_group;g__norank_f__Sva0996_marine_group;s__marine_metagenome_g__norank_f__Sva0996_marine_group
OTU545	1	0	0	0	1	0	0	0	1	0	0	d__Bacteria;k__norank;p__Proteobacteria;c__Gammaproteobacteria;o__Cellvibrionales;f__Porticoccaceae;g__SAR92_clade;s__Porticoccaceae_bacterium_LSUCC0057
OTU546	1	0	1	1	1	1	1	1	1	1	1	d__Bacteria;k__norank;p__Proteobacteria;c__Gammaproteobacteria;o__Xanthomonadales;f__JTB255_marine_benthic_group;g__norank_f__JTB255_marine_benthic_group;s__unclassified_g__norank_f__JTB255_marine_benthic_group
OTU547	1	0	0	0	0	0	0	0	1	1	0	d__Bacteria;k__norank;p__Bacteroidetes;c__Bacteroidia;o__Bacteroidales;f__Marinilabiaceae;g__Marinifilum;s__unclassified_g__Marinifilum
OTU548	1	0	0	0	1	0	0	0	1	0	0	d__Bacteria;k__norank;p__Proteobacteria;c__Alphaproteobacteria;o__Emcibacterales;f__Emcibacteraceae;g__Emcibacter;s__alpha_proteobacterium_dMB-MAT35
OTU549	1	1	0	0	1	0	0	0	1	1	1	d__Bacteria;k__norank;p__Proteobacteria;c__Gammaproteobacteria;o__Oceanospirillales;f__SAR86_clade;g__norank_f__SAR86_clade;s__uncultured_gamma_proteobacterium_CHAB-I-7
OTU550	1	0	1	0	1	0	0	0	1	1	1	d__Bacteria;k__norank;p__Proteobacteria;c__Gammaproteobacteria;o__Cellvibrionales;f__Halieaceae;g__unclassified_f__Halieaceae;s__unclassified_f__Halieaceae
OTU551	1	0	0	1	1	0	1	1	1	0	1	d__Bacteria;k__norank;p__Proteobacteria;c__Gammaproteobacteria;o__Oceanospirillales;f__Oleiphilaceae;g__Oleiphilus;s__unclassified_g__Oleiphilus
OTU552	1	0	0	0	0	0	0	0	0	0	0	d__Bacteria;k__norank;p__Proteobacteria;c__Gammaproteobacteria;o__Thiotrichales;f__Thiotrichaceae;g__norank_f__Thiotrichaceae;s__uncultured_beta_proteobacterium_g__norank_f__Thiotrichaceae
OTU553	1	1	0	0	1	0	0	0	1	1	1	d__Bacteria;k__norank;p__Proteobacteria;c__Gammaproteobacteria;o__Oceanospirillales;f__SAR86_clade;g__norank_f__SAR86_clade;s__marine_metagenome_g__norank_f__SAR86_clade
OTU554	1	0	0	0	1	0	0	0	1	1	1	d__Bacteria;k__norank;p__Proteobacteria;c__Gammaproteobacteria;o__Alteromonadales;f__Colwelliaceae;g__norank_f__Colwelliaceae;s__Colwellia_sp._1tb5
OTU555	1	1	0	0	1	0	0	0	1	1	1	d__Bacteria;k__norank;p__Proteobacteria;c__Deltaproteobacteria;o__Bdellovibrionales;f__Bdellovibrionaceae;g__OM27_clade;s__unclassified_g__OM27_clade
OTU556	1	1	1	1	1	0	1	1	1	1	1	d__Bacteria;k__norank;p__Proteobacteria;c__Gammaproteobacteria;o__Oceanospirillales;f__SS1-B-06-26;g__norank_f__SS1-B-06-26;s__uncultured_gamma_proteobacterium_g__norank_f__SS1-B-06-26
OTU557	1	0	0	0	1	0	0	0	1	0	1	d__Bacteria;k__norank;p__Proteobacteria;c__Gammaproteobacteria;o__Cellvibrionales;f__Halieaceae;g__unclassified_f__Halieaceae;s__unclassified_f__Halieaceae
OTU558	1	0	1	0	1	0	0	0	1	1	1	d__Bacteria;k__norank;p__Proteobacteria;c__Gammaproteobacteria;o__Oceanospirillales;f__Alcanivoracaceae;g__Alcanivorax;s__uncultured_gamma_proteobacterium_g__Alcanivorax
OTU559	1	0	0	0	0	0	0	0	0	0	0	d__Bacteria;k__norank;p__Proteobacteria;c__Deltaproteobacteria;o__Desulfobacterales;f__Desulfobacteraceae;g__Desulfoluna;s__unclassified_g__Desulfoluna
OTU560	1	1	1	0	1	0	0	0	1	1	1	d__Bacteria;k__norank;p__Cyanobacteria;c__Cyanobacteria;o__norank_c__Cyanobacteria;f__norank_c__Cyanobacteria;g__norank_c__Cyanobacteria;s__uncultured_marine_eukaryote
OTU561	1	0	0	0	0	1	0	0	0	0	0	d__Bacteria;k__norank;p__Cyanobacteria;c__Cyanobacteria;o__SubsectionI;f__FamilyI_o__SubsectionI;g__unclassified_f__FamilyI_o__SubsectionI;s__unclassified_f__FamilyI_o__SubsectionI
OTU562	1	1	1	0	1	0	0	0	1	1	1	d__Bacteria;k__norank;p__Cyanobacteria;c__Cyanobacteria;o__norank_c__Cyanobacteria;f__norank_c__Cyanobacteria;g__norank_c__Cyanobacteria;s__unclassified_g__norank_c__Cyanobacteria
OTU563	1	1	0	0	1	1	1	0	1	1	1	d__Bacteria;k__norank;p__Cyanobacteria;c__Cyanobacteria;o__norank_c__Cyanobacteria;f__norank_c__Cyanobacteria;g__norank_c__Cyanobacteria;s__unclassified_g__norank_c__Cyanobacteria
OTU564	1	0	0	0	0	0	0	0	1	1	0	d__Bacteria;k__norank;p__Proteobacteria;c__Deltaproteobacteria;o__Bdellovibrionales;f__Bdellovibrionaceae;g__Bdellovibrio;s__uncultured_marine_bacterium_g__Bdellovibrio
OTU565	1	0	0	0	1	1	1	0	1	1	1	d__Bacteria;k__norank;p__Bacteroidetes;c__Flavobacteriia;o__Flavobacteriales;f__Flavobacteriaceae;g__Winogradskyella;s__uncultured_bacterium_g__Winogradskyella
OTU566	1	0	0	0	1	0	0	0	1	1	0	d__Bacteria;k__norank;p__Bacteroidetes;c__Sphingobacteriia;o__Sphingobacteriales;f__NS11-12_marine_group;g__norank_f__NS11-12_marine_group;s__unclassified_g__norank_f__NS11-12_marine_group
OTU567	1	0	0	0	1	0	0	0	1	1	1	d__Bacteria;k__norank;p__Proteobacteria;c__Alphaproteobacteria;o__Rhodospirillales;f__Rhodospirillaceae;g__Magnetospira;s__Candidatus_Nitrosoarchaeum_limnia_SFB1_g__Magnetospira
OTU568	1	0	0	0	0	0	0	0	0	0	0	d__Bacteria;k__norank;p__Bacteroidetes;c__Flavobacteriia;o__Flavobacteriales;f__Cryomorphaceae;g__norank_f__Cryomorphaceae;s__uncultured_Bacteroidetes_bacterium_g__norank_f__Cryomorphaceae
OTU569	1	0	0	0	1	0	0	0	0	0	1	d__Bacteria;k__norank;p__Bacteroidetes;c__Flavobacteriia;o__Flavobacteriales;f__Flavobacteriaceae;g__unclassified_f__Flavobacteriaceae;s__unclassified_f__Flavobacteriaceae
OTU570	1	0	0	0	1	0	0	0	1	1	1	d__Bacteria;k__norank;p__Bacteroidetes;c__Flavobacteriia;o__Flavobacteriales;f__Flavobacteriaceae;g__Lutibacter;s__unclassified_g__Lutibacter
OTU571	0	1	0	0	0	1	0	0	0	0	0	d__Bacteria;k__norank;p__Proteobacteria;c__Gammaproteobacteria;o__Gammaproteobacteria_Incertae_Sedis;f__Unknown_Family_o__Gammaproteobacteria_Incertae_Sedis;g__norank_f__Unknown_Family_o__Gammaproteobacteria_Incertae_Sedis;s__marine_metagenome_g__norank_f__Unknown_Family_o__Gammaproteobacteria_Incertae_Sedis
OTU572	1	0	0	1	0	1	1	1	1	0	0	d__Bacteria;k__norank;p__Bacteroidetes;c__Flavobacteriia;o__Flavobacteriales;f__Cryomorphaceae;g__Crocinitomix;s__uncultured_Crocinitomix_sp.
OTU573	0	1	1	0	0	1	1	0	0	0	0	d__Bacteria;k__norank;p__SBR1093;c__norank_p__SBR1093;o__norank_p__SBR1093;f__norank_p__SBR1093;g__norank_p__SBR1093;s__marine_metagenome_g__norank_p__SBR1093
OTU574	0	0	0	0	0	1	0	0	0	0	0	d__Bacteria;k__norank;p__Proteobacteria;c__Gammaproteobacteria;o__Xanthomonadales;f__unclassified_o__Xanthomonadales;g__unclassified_o__Xanthomonadales;s__unclassified_o__Xanthomonadales
OTU575	1	0	0	0	1	1	1	0	0	0	1	d__Bacteria;k__norank;p__Bacteroidetes;c__Flavobacteriia;o__Flavobacteriales;f__Flavobacteriaceae;g__unclassified_f__Flavobacteriaceae;s__unclassified_f__Flavobacteriaceae
OTU576	1	1	1	1	0	1	1	1	1	0	1	d__Bacteria;k__norank;p__Bacteroidetes;c__Flavobacteriia;o__Flavobacteriales;f__unclassified_o__Flavobacteriales;g__unclassified_o__Flavobacteriales;s__unclassified_o__Flavobacteriales
OTU577	1	1	1	0	1	1	1	0	1	1	1	d__Bacteria;k__norank;p__Marinimicrobia__SAR406_clade_;c__norank_p__Marinimicrobia__SAR406_clade_;o__norank_p__Marinimicrobia__SAR406_clade_;f__norank_p__Marinimicrobia__SAR406_clade_;g__norank_p__Marinimicrobia__SAR406_clade_;s__unclassified_g__norank_p__Marinimicrobia__SAR406_clade_
OTU578	1	1	1	0	0	1	1	1	0	0	0	d__Bacteria;k__norank;p__Verrucomicrobia;c__Verrucomicrobiae;o__Verrucomicrobiales;f__Verrucomicrobiaceae;g__Roseibacillus;s__uncultured_Verrucomicrobiaceae_bacterium_g__Roseibacillus
OTU579	1	1	0	0	1	1	0	0	1	1	1	d__Bacteria;k__norank;p__Proteobacteria;c__Gammaproteobacteria;o__KI89A_clade;f__norank_o__KI89A_clade;g__norank_o__KI89A_clade;s__uncultured_bacterium_g__norank_o__KI89A_clade
OTU580	1	1	0	0	1	1	0	0	1	1	1	d__Bacteria;k__norank;p__Bacteroidetes;c__Flavobacteriia;o__Flavobacteriales;f__Flavobacteriaceae;g__NS5_marine_group;s__unclassified_g__NS5_marine_group
OTU581	0	1	0	0	0	1	0	0	1	0	0	d__Bacteria;k__norank;p__Cyanobacteria;c__Cyanobacteria;o__norank_c__Cyanobacteria;f__norank_c__Cyanobacteria;g__norank_c__Cyanobacteria;s__unclassified_g__norank_c__Cyanobacteria
OTU582	0	1	1	1	0	1	1	1	0	0	0	d__Bacteria;k__norank;p__Planctomycetes;c__Phycisphaerae;o__Phycisphaerales;f__Phycisphaeraceae;g__FS140-16B-02_marine_group;s__uncultured_bacterium_g__FS140-16B-02_marine_group
OTU583	1	1	0	0	0	1	0	0	0	1	1	d__Bacteria;k__norank;p__Proteobacteria;c__Alphaproteobacteria;o__Rhodospirillales;f__Rhodospirillaceae;g__Magnetospira;s__unclassified_g__Magnetospira
OTU584	0	1	0	0	0	1	0	0	0	0	0	d__Bacteria;k__norank;p__Proteobacteria;c__Alphaproteobacteria;o__Rhodospirillales;f__AT-s3-44;g__norank_f__AT-s3-44;s__uncultured_bacterium_g__norank_f__AT-s3-44
OTU585	0	1	1	0	0	1	1	0	0	0	1	d__Bacteria;k__norank;p__Marinimicrobia__SAR406_clade_;c__norank_p__Marinimicrobia__SAR406_clade_;o__norank_p__Marinimicrobia__SAR406_clade_;f__norank_p__Marinimicrobia__SAR406_clade_;g__norank_p__Marinimicrobia__SAR406_clade_;s__Alteromonas_macleodii_g__norank
OTU586	0	0	0	0	1	1	1	0	0	0	0	d__Bacteria;k__norank;p__Proteobacteria;c__Gammaproteobacteria;o__Xanthomonadales;f__Nevskiaceae;g__Nevskia;s__unclassified_g__Nevskia
OTU587	0	1	0	0	0	1	0	0	0	0	0	d__Bacteria;k__norank;p__Proteobacteria;c__Betaproteobacteria;o__Hydrogenophilales;f__Hydrogenophilaceae;g__norank_f__Hydrogenophilaceae;s__unclassified_g__norank_f__Hydrogenophilaceae
OTU588	1	1	1	0	1	1	1	1	0	1	1	d__Bacteria;k__norank;p__Proteobacteria;c__Alphaproteobacteria;o__SAR11_clade;f__norank_o__SAR11_clade;g__norank_o__SAR11_clade;s__unidentified_marine_bacterioplankton_g__norank_o__SAR11_clade
OTU589	0	0	0	1	0	1	0	0	1	0	0	d__Bacteria;k__norank;p__unclassified_k__norank;c__unclassified_k__norank;o__unclassified_k__norank;f__unclassified_k__norank;g__unclassified_k__norank;s__unclassified_k__norank
OTU590	0	0	0	0	0	1	0	0	0	0	0	d__Bacteria;k__norank;p__Cyanobacteria;c__Cyanobacteria;o__norank_c__Cyanobacteria;f__norank_c__Cyanobacteria;g__norank_c__Cyanobacteria;s__marine_metagenome_g__norank_c__Cyanobacteria
OTU591	1	1	0	1	0	1	1	1	1	1	1	d__Bacteria;k__norank;p__Proteobacteria;c__JdFBHP3;o__norank_c__JdFBHP3;f__norank_c__JdFBHP3;g__norank_c__JdFBHP3;s__uncultured_delta_proteobacterium_g__norank_c__JdFBHP3
OTU592	0	1	1	1	0	1	1	1	0	0	0	d__Bacteria;k__norank;p__Proteobacteria;c__Alphaproteobacteria;o__Rhodospirillales;f__Rhodospirillaceae;g__AEGEAN-169_marine_group;s__uncultured_bacterium_g__AEGEAN-169_marine_group
OTU593	0	1	1	1	0	1	1	1	0	0	0	d__Bacteria;k__norank;p__Proteobacteria;c__Alphaproteobacteria;o__Rhodospirillales;f__Rhodospirillaceae;g__AEGEAN-169_marine_group;s__unclassified_g__AEGEAN-169_marine_group
OTU594	1	1	1	1	0	1	1	1	0	0	1	d__Bacteria;k__norank;p__Proteobacteria;c__Alphaproteobacteria;o__Rhodospirillales;f__Rhodospirillaceae;g__AEGEAN-169_marine_group;s__unclassified_g__AEGEAN-169_marine_group
OTU595	0	1	1	0	0	1	1	0	0	0	0	d__Bacteria;k__norank;p__Actinobacteria;c__Actinobacteria;o__Acidimicrobiales;f__Sva0996_marine_group;g__norank_f__Sva0996_marine_group;s__marine_metagenome_g__norank_f__Sva0996_marine_group
OTU596	0	1	1	0	0	1	0	0	0	0	0	d__Bacteria;k__norank;p__Actinobacteria;c__Actinobacteria;o__Acidimicrobiales;f__Sva0996_marine_group;g__norank_f__Sva0996_marine_group;s__uncultured_marine_microorganism_g__norank
OTU597	0	1	0	0	0	1	0	0	1	0	0	d__Bacteria;k__norank;p__unclassified_k__norank;c__unclassified_k__norank;o__unclassified_k__norank;f__unclassified_k__norank;g__unclassified_k__norank;s__unclassified_k__norank
OTU598	0	0	0	0	1	1	1	0	0	0	0	d__Bacteria;k__norank;p__Cyanobacteria;c__Cyanobacteria;o__norank_c__Cyanobacteria;f__norank_c__Cyanobacteria;g__norank_c__Cyanobacteria;s__uncultured_phototrophic_eukaryote_g__norank
OTU599	1	1	1	0	1	1	1	1	1	1	1	d__Bacteria;k__norank;p__Cyanobacteria;c__Cyanobacteria;o__norank_c__Cyanobacteria;f__norank_c__Cyanobacteria;g__norank_c__Cyanobacteria;s__Phalacroma_mitra
OTU600	0	0	0	0	0	1	1	1	0	0	0	d__Bacteria;k__norank;p__Proteobacteria;c__Betaproteobacteria;o__TRA3-20;f__norank_o__TRA3-20;g__norank_o__TRA3-20;s__unclassified_g__norank_o__TRA3-20
OTU601	0	0	1	0	0	1	1	1	0	0	0	d__Bacteria;k__norank;p__Proteobacteria;c__Deltaproteobacteria;o__Bdellovibrionales;f__Bdellovibrionaceae;g__OM27_clade;s__uncultured_delta_proteobacterium_g__OM27_clade
OTU602	0	1	1	1	0	1	1	1	0	0	0	d__Bacteria;k__norank;p__Chloroflexi;c__SAR202_clade;o__norank_c__SAR202_clade;f__norank_c__SAR202_clade;g__norank_c__SAR202_clade;s__marine_metagenome_g__norank_c__SAR202_clade
OTU603	0	1	1	0	0	1	1	0	0	0	0	d__Bacteria;k__norank;p__SBR1093;c__norank_p__SBR1093;o__norank_p__SBR1093;f__norank_p__SBR1093;g__norank_p__SBR1093;s__marine_metagenome_g__norank_p__SBR1093
OTU604	0	0	1	0	0	1	0	0	0	0	0	d__Bacteria;k__norank;p__Poribacteria;c__norank_p__Poribacteria;o__norank_p__Poribacteria;f__norank_p__Poribacteria;g__norank_p__Poribacteria;s__marine_metagenome_g__norank_p__Poribacteria
OTU605	0	1	0	0	0	1	0	0	0	0	0	d__Bacteria;k__norank;p__Chloroflexi;c__SAR202_clade;o__norank_c__SAR202_clade;f__norank_c__SAR202_clade;g__norank_c__SAR202_clade;s__marine_metagenome_g__norank_c__SAR202_clade
OTU606	1	0	0	0	1	1	0	0	1	1	1	d__Bacteria;k__norank;p__Proteobacteria;c__Gammaproteobacteria;o__Cellvibrionales;f__Halieaceae;g__OM60_NOR5__clade;s__uncultured_bacterium_g__OM60_NOR5__clade
OTU607	0	0	0	0	0	1	0	0	0	0	0	d__Bacteria;k__norank;p__Cyanobacteria;c__Cyanobacteria;o__norank_c__Cyanobacteria;f__norank_c__Cyanobacteria;g__norank_c__Cyanobacteria;s__unclassified_g__norank_c__Cyanobacteria
OTU608	0	1	1	0	0	1	1	0	0	0	0	d__Bacteria;k__norank;p__Bacteroidetes;c__Sphingobacteriia;o__Sphingobacteriales;f__Saprospiraceae;g__Aureispira;s__uncultured_Saprospiraceae_bacterium_g__Aureispira
OTU609	0	1	1	0	0	1	1	1	0	0	0	d__Bacteria;k__norank;p__Marinimicrobia__SAR406_clade_;c__norank_p__Marinimicrobia__SAR406_clade_;o__norank_p__Marinimicrobia__SAR406_clade_;f__norank_p__Marinimicrobia__SAR406_clade_;g__norank_p__Marinimicrobia__SAR406_clade_;s__uncultured_FibrobacteresAcidobacteria_group_bacterium
OTU610	0	1	0	0	0	1	0	0	0	0	0	d__Bacteria;k__norank;p__Cyanobacteria;c__Cyanobacteria;o__norank_c__Cyanobacteria;f__norank_c__Cyanobacteria;g__norank_c__Cyanobacteria;s__Cymbomonas_tetramitiformis
OTU611	1	1	1	0	1	1	1	0	1	1	1	d__Bacteria;k__norank;p__Cyanobacteria;c__Cyanobacteria;o__norank_c__Cyanobacteria;f__norank_c__Cyanobacteria;g__norank_c__Cyanobacteria;s__unclassified_g__norank_c__Cyanobacteria
OTU612	1	1	1	1	1	1	1	1	1	1	1	d__Bacteria;k__norank;p__Cyanobacteria;c__Cyanobacteria;o__SubsectionI;f__FamilyI_o__SubsectionI;g__Synechococcus;s__unclassified_g__Synechococcus
OTU613	1	1	1	0	1	1	1	0	1	1	1	d__Bacteria;k__norank;p__Proteobacteria;c__Alphaproteobacteria;o__Rickettsiales;f__S25-593;g__norank_f__S25-593;s__uncultured_bacterium_g__norank_f__S25-593
OTU614	0	0	0	0	1	1	1	1	1	1	0	d__Bacteria;k__norank;p__Proteobacteria;c__Gammaproteobacteria;o__Gammaproteobacteria_Incertae_Sedis;f__Unknown_Family_o__Gammaproteobacteria_Incertae_Sedis;g__Marinicella;s__Marinicella_litoralis
OTU615	0	1	1	0	0	1	1	0	0	0	0	d__Bacteria;k__norank;p__Proteobacteria;c__Alphaproteobacteria;o__Rhodospirillales;f__Rhodospirillaceae;g__norank_f__Rhodospirillaceae;s__uncultured_SAR11_cluster_alpha_proteobacterium_g__norank_f__Rhodospirillaceae
OTU616	0	1	1	1	0	1	1	1	0	0	0	d__Bacteria;k__norank;p__Marinimicrobia__SAR406_clade_;c__norank_p__Marinimicrobia__SAR406_clade_;o__norank_p__Marinimicrobia__SAR406_clade_;f__norank_p__Marinimicrobia__SAR406_clade_;g__norank_p__Marinimicrobia__SAR406_clade_;s__Marinimicrobia_bacterium_SCGC_AAA160-I06
OTU617	1	0	1	0	1	1	1	1	0	1	1	d__Bacteria;k__norank;p__Proteobacteria;c__Deltaproteobacteria;o__Bdellovibrionales;f__Bacteriovoracaceae;g__Peredibacter;s__unclassified_g__Peredibacter
OTU618	1	1	1	1	1	1	1	1	1	1	1	d__Bacteria;k__norank;p__Proteobacteria;c__Alphaproteobacteria;o__SAR11_clade;f__Surface_4;g__norank_f__Surface_4;s__unclassified_g__norank_f__Surface_4
OTU619	0	1	1	1	0	1	1	1	0	0	1	d__Bacteria;k__norank;p__Proteobacteria;c__Deltaproteobacteria;o__SAR324_clade_Marine_group_B_;f__norank_o__SAR324_clade_Marine_group_B_;g__norank_o__SAR324_clade_Marine_group_B_;s__uncultured_SAR324_cluster_bacterium
OTU620	0	1	1	0	0	1	1	0	0	0	0	d__Bacteria;k__norank;p__Bacteroidetes;c__Flavobacteriia;o__Flavobacteriales;f__Flavobacteriaceae;g__NS5_marine_group;s__unclassified_g__NS5_marine_group
OTU621	0	1	0	0	0	1	1	0	0	1	0	d__Bacteria;k__norank;p__unclassified_k__norank;c__unclassified_k__norank;o__unclassified_k__norank;f__unclassified_k__norank;g__unclassified_k__norank;s__unclassified_k__norank
OTU622	0	1	1	0	0	1	0	0	0	0	0	d__Bacteria;k__norank;p__Proteobacteria;c__Deltaproteobacteria;o__Oligoflexales;f__Oligoflexaceae;g__norank_f__Oligoflexaceae;s__unclassified_g__norank_f__Oligoflexaceae
OTU623	0	0	1	0	0	1	1	1	0	0	0	d__Bacteria;k__norank;p__Proteobacteria;c__Deltaproteobacteria;o__Myxococcales;f__P3OB-42;g__norank_f__P3OB-42;s__uncultured_marine_microorganism_g__norank_f__P3OB-42
OTU624	1	1	1	1	1	1	1	1	1	1	1	d__Bacteria;k__norank;p__Proteobacteria;c__Alphaproteobacteria;o__SAR11_clade;f__Surface_1;g__norank_f__Surface_1;s__unclassified_g__norank_f__Surface_1
OTU625	0	1	1	1	0	1	1	1	0	0	0	d__Bacteria;k__norank;p__Planctomycetes;c__Phycisphaerae;o__Phycisphaerales;f__Phycisphaeraceae;g__FS140-16B-02_marine_group;s__uncultured_Phycisphaeraceae_bacterium_g__FS140-16B-02_marine_group
OTU626	1	1	1	0	1	1	1	0	0	1	0	d__Bacteria;k__norank;p__Proteobacteria;c__Alphaproteobacteria;o__Rhodobacterales;f__Rhodobacteraceae;g__norank_f__Rhodobacteraceae;s__marine_metagenome_g__norank_f__Rhodobacteraceae
OTU627	0	0	0	0	0	1	0	0	0	0	1	d__Bacteria;k__norank;p__Verrucomicrobia;c__Arctic97B-4_marine_group;o__norank_c__Arctic97B-4_marine_group;f__norank_c__Arctic97B-4_marine_group;g__norank_c__Arctic97B-4_marine_group;s__uncultured_marine_microorganism_g__norank_c__Arctic97B-4_marine_group
OTU628	1	1	1	0	1	1	1	0	1	1	1	d__Bacteria;k__norank;p__Firmicutes;c__Clostridia;o__Halanaerobiales;f__ODP1230B8.23;g__norank_f__ODP1230B8.23;s__marine_metagenome_g__norank_f__ODP1230B8.23
OTU629	0	0	0	0	0	1	1	1	0	0	0	d__Bacteria;k__norank;p__Proteobacteria;c__Deltaproteobacteria;o__Oligoflexales;f__053A03-B-DI-P58;g__norank_f__053A03-B-DI-P58;s__uncultured_delta_proteobacterium_g__norank_f__053A03-B-DI-P58
OTU630	0	0	1	0	0	1	0	0	0	0	0	d__Bacteria;k__norank;p__Marinimicrobia__SAR406_clade_;c__norank_p__Marinimicrobia__SAR406_clade_;o__norank_p__Marinimicrobia__SAR406_clade_;f__norank_p__Marinimicrobia__SAR406_clade_;g__norank_p__Marinimicrobia__SAR406_clade_;s__uncultured_bacterium_g__norank_p__Marinimicrobia__SAR406_clade_
OTU631	0	1	0	0	0	1	0	0	0	1	0	d__Bacteria;k__norank;p__Chloroflexi;c__SAR202_clade;o__norank_c__SAR202_clade;f__norank_c__SAR202_clade;g__norank_c__SAR202_clade;s__marine_metagenome_g__norank_c__SAR202_clade
OTU632	0	1	0	0	0	1	0	0	0	0	0	d__Bacteria;k__norank;p__Proteobacteria;c__Alphaproteobacteria;o__Rhodospirillales;f__Rhodospirillaceae;g__norank_f__Rhodospirillaceae;s__unclassified_g__norank_f__Rhodospirillaceae
OTU633	0	1	0	0	0	1	0	0	1	1	1	d__Bacteria;k__norank;p__Proteobacteria;c__Gammaproteobacteria;o__Oceanospirillales;f__OM182_clade;g__norank_f__OM182_clade;s__uncultured_gamma_proteobacterium_g__norank_f__OM182_clade
OTU634	0	1	0	1	0	1	0	1	0	0	0	d__Bacteria;k__norank;p__Proteobacteria;c__Alphaproteobacteria;o__unclassified_c__Alphaproteobacteria;f__unclassified_c__Alphaproteobacteria;g__unclassified_c__Alphaproteobacteria;s__unclassified_c__Alphaproteobacteria
OTU635	0	1	1	0	0	1	1	0	0	0	0	d__Bacteria;k__norank;p__Actinobacteria;c__Actinobacteria;o__Acidimicrobiales;f__OM1_clade;g__Candidatus_Actinomarina;s__marine_metagenome_g__Candidatus_Actinomarina
OTU636	0	1	0	0	0	1	0	0	0	0	0	d__Bacteria;k__norank;p__Proteobacteria;c__Elev-16S-509;o__norank_c__Elev-16S-509;f__norank_c__Elev-16S-509;g__norank_c__Elev-16S-509;s__uncultured_marine_bacterium_g__norank_c__Elev-16S-509
OTU637	1	1	1	0	1	1	1	0	1	1	1	d__Bacteria;k__norank;p__Proteobacteria;c__Deltaproteobacteria;o__Oligoflexales;f__Oligoflexaceae;g__norank_f__Oligoflexaceae;s__uncultured_bacterium_g__norank_f__Oligoflexaceae
OTU638	0	1	0	0	0	1	0	0	0	0	0	d__Bacteria;k__norank;p__Proteobacteria;c__Deltaproteobacteria;o__Oligoflexales;f__Oligoflexaceae;g__norank_f__Oligoflexaceae;s__unclassified_g__norank_f__Oligoflexaceae
OTU639	0	0	0	0	0	1	0	0	0	0	0	d__Bacteria;k__norank;p__Proteobacteria;c__Deltaproteobacteria;o__Bradymonadales;f__norank_o__Bradymonadales;g__norank_o__Bradymonadales;s__uncultured_bacterium_g__norank_o__Bradymonadales
OTU640	1	1	1	0	1	1	1	0	1	0	0	d__Bacteria;k__norank;p__Proteobacteria;c__Alphaproteobacteria;o__Rhizobiales;f__PS1_clade;g__norank_f__PS1_clade;s__unclassified_g__norank_f__PS1_clade
OTU641	1	1	1	0	1	1	1	0	1	1	1	d__Bacteria;k__norank;p__Proteobacteria;c__Alphaproteobacteria;o__SAR11_clade;f__Surface_2;g__norank_f__Surface_2;s__unclassified_g__norank_f__Surface_2
OTU642	0	0	0	0	0	1	1	0	0	0	0	d__Bacteria;k__norank;p__Proteobacteria;c__Deltaproteobacteria;o__Desulfurellales;f__Desulfurellaceae;g__H16;s__uncultured_delta_proteobacterium_g__H16
OTU643	0	0	0	0	0	1	1	0	0	0	0	d__Bacteria;k__norank;p__Cyanobacteria;c__Cyanobacteria;o__norank_c__Cyanobacteria;f__norank_c__Cyanobacteria;g__norank_c__Cyanobacteria;s__unclassified_g__norank_c__Cyanobacteria
OTU644	1	1	1	1	1	1	1	1	1	1	1	d__Bacteria;k__norank;p__Proteobacteria;c__Alphaproteobacteria;o__Rickettsiales;f__SAR116_clade;g__norank_f__SAR116_clade;s__marine_metagenome_g__norank_f__SAR116_clade
OTU645	0	1	0	1	1	1	1	1	0	1	1	d__Bacteria;k__norank;p__Proteobacteria;c__Gammaproteobacteria;o__Legionellales;f__Coxiellaceae;g__Coxiella;s__unclassified_g__Coxiella
OTU646	1	1	1	0	0	1	0	0	0	0	0	d__Bacteria;k__norank;p__Marinimicrobia__SAR406_clade_;c__norank_p__Marinimicrobia__SAR406_clade_;o__norank_p__Marinimicrobia__SAR406_clade_;f__norank_p__Marinimicrobia__SAR406_clade_;g__norank_p__Marinimicrobia__SAR406_clade_;s__unclassified_g__norank_p__Marinimicrobia__SAR406_clade_
OTU647	0	0	1	0	0	1	1	0	0	0	0	d__Bacteria;k__norank;p__Proteobacteria;c__Gammaproteobacteria;o__unclassified_c__Gammaproteobacteria;f__unclassified_c__Gammaproteobacteria;g__unclassified_c__Gammaproteobacteria;s__unclassified_c__Gammaproteobacteria
OTU648	0	0	1	0	0	1	1	1	0	0	0	d__Bacteria;k__norank;p__Marinimicrobia__SAR406_clade_;c__norank_p__Marinimicrobia__SAR406_clade_;o__norank_p__Marinimicrobia__SAR406_clade_;f__norank_p__Marinimicrobia__SAR406_clade_;g__norank_p__Marinimicrobia__SAR406_clade_;s__uncultured_bacterium_g__norank_p__Marinimicrobia__SAR406_clade_
OTU649	0	1	1	0	0	1	0	0	0	0	0	d__Bacteria;k__norank;p__Proteobacteria;c__Gammaproteobacteria;o__Xanthomonadales;f__JTB255_marine_benthic_group;g__norank_f__JTB255_marine_benthic_group;s__unclassified_g__norank_f__JTB255_marine_benthic_group
OTU650	0	0	0	0	0	1	0	0	0	0	0	d__Bacteria;k__norank;p__Proteobacteria;c__unclassified_p__Proteobacteria;o__unclassified_p__Proteobacteria;f__unclassified_p__Proteobacteria;g__unclassified_p__Proteobacteria;s__unclassified_p__Proteobacteria
OTU651	0	1	0	0	0	1	0	0	0	0	0	d__Bacteria;k__norank;p__Cyanobacteria;c__Cyanobacteria;o__norank_c__Cyanobacteria;f__norank_c__Cyanobacteria;g__norank_c__Cyanobacteria;s__uncultured_marine_eukaryote
OTU652	1	0	0	0	1	1	0	0	1	1	1	d__Bacteria;k__norank;p__Proteobacteria;c__Deltaproteobacteria;o__Oligoflexales;f__053A03-B-DI-P58;g__norank_f__053A03-B-DI-P58;s__unclassified_g__norank_f__053A03-B-DI-P58
OTU653	0	0	0	0	0	1	0	0	0	0	0	d__Bacteria;k__norank;p__Marinimicrobia__SAR406_clade_;c__norank_p__Marinimicrobia__SAR406_clade_;o__norank_p__Marinimicrobia__SAR406_clade_;f__norank_p__Marinimicrobia__SAR406_clade_;g__norank_p__Marinimicrobia__SAR406_clade_;s__unclassified_g__norank_p__Marinimicrobia__SAR406_clade_
OTU654	0	1	0	0	0	1	0	0	0	1	0	d__Bacteria;k__norank;p__Proteobacteria;c__Betaproteobacteria;o__Burkholderiales;f__Alcaligenaceae;g__MWH-UniP1_aquatic_group;s__uncultured_bacterium_g__MWH-UniP1_aquatic_group
OTU655	1	0	0	0	1	1	1	0	1	1	1	d__Bacteria;k__norank;p__Proteobacteria;c__Alphaproteobacteria;o__Rickettsiales;f__Mitochondria;g__norank_f__Mitochondria;s__unclassified_g__norank_f__Mitochondria
OTU656	1	1	1	1	1	1	1	1	1	1	1	d__Bacteria;k__norank;p__Proteobacteria;c__JdFBHP3;o__norank_c__JdFBHP3;f__norank_c__JdFBHP3;g__norank_c__JdFBHP3;s__unclassified_g__norank_c__JdFBHP3
OTU657	0	0	0	0	0	1	0	0	0	0	0	d__Bacteria;k__norank;p__Gracilibacteria;c__norank_p__Gracilibacteria;o__norank_p__Gracilibacteria;f__norank_p__Gracilibacteria;g__norank_p__Gracilibacteria;s__unclassified_g__norank_p__Gracilibacteria
OTU658	0	1	1	1	0	1	1	1	0	0	0	d__Bacteria;k__norank;p__Bacteroidetes;c__Flavobacteriia;o__Flavobacteriales;f__Flavobacteriaceae;g__NS5_marine_group;s__unclassified_g__NS5_marine_group
OTU659	0	1	0	0	0	1	0	0	0	0	0	d__Bacteria;k__norank;p__Planctomycetes;c__OM190;o__norank_c__OM190;f__norank_c__OM190;g__norank_c__OM190;s__uncultured_marine_bacterium_g__norank_c__OM190
OTU660	1	1	1	0	1	1	1	1	1	1	1	d__Bacteria;k__norank;p__Bacteroidetes;c__Flavobacteriia;o__Flavobacteriales;f__NS9_marine_group;g__norank_f__NS9_marine_group;s__uncultured_bacterium_g__norank_f__NS9_marine_group
OTU661	0	1	1	0	0	1	1	1	0	0	0	d__Bacteria;k__norank;p__Proteobacteria;c__Deltaproteobacteria;o__NB1-j;f__norank_o__NB1-j;g__norank_o__NB1-j;s__uncultured_delta_proteobacterium_g__norank_o__NB1-j
OTU662	0	1	0	0	0	1	0	0	1	1	0	d__Bacteria;k__norank;p__Marinimicrobia__SAR406_clade_;c__norank_p__Marinimicrobia__SAR406_clade_;o__norank_p__Marinimicrobia__SAR406_clade_;f__norank_p__Marinimicrobia__SAR406_clade_;g__norank_p__Marinimicrobia__SAR406_clade_;s__unclassified_g__norank_p__Marinimicrobia__SAR406_clade_
OTU663	0	0	0	0	0	1	0	0	0	0	0	d__Bacteria;k__norank;p__Cyanobacteria;c__Cyanobacteria;o__norank_c__Cyanobacteria;f__norank_c__Cyanobacteria;g__norank_c__Cyanobacteria;s__unclassified_g__norank_c__Cyanobacteria
OTU664	0	0	1	1	0	1	1	1	0	0	0	d__Bacteria;k__norank;p__Marinimicrobia__SAR406_clade_;c__norank_p__Marinimicrobia__SAR406_clade_;o__norank_p__Marinimicrobia__SAR406_clade_;f__norank_p__Marinimicrobia__SAR406_clade_;g__norank_p__Marinimicrobia__SAR406_clade_;s__uncultured_bacterium_g__norank_p__Marinimicrobia__SAR406_clade_
OTU665	0	1	1	0	0	1	1	1	0	0	1	d__Bacteria;k__norank;p__Marinimicrobia__SAR406_clade_;c__norank_p__Marinimicrobia__SAR406_clade_;o__norank_p__Marinimicrobia__SAR406_clade_;f__norank_p__Marinimicrobia__SAR406_clade_;g__norank_p__Marinimicrobia__SAR406_clade_;s__unclassified_g__norank_p__Marinimicrobia__SAR406_clade_
OTU666	1	1	1	0	1	1	1	0	1	1	0	d__Bacteria;k__norank;p__Bacteroidetes;c__Flavobacteriia;o__Flavobacteriales;f__NS9_marine_group;g__norank_f__NS9_marine_group;s__uncultured_bacterium_g__norank_f__NS9_marine_group
OTU667	0	0	0	0	0	1	0	0	0	0	0	d__Bacteria;k__norank;p__Proteobacteria;c__Deltaproteobacteria;o__Myxococcales;f__Sandaracinaceae;g__norank_f__Sandaracinaceae;s__uncultured_bacterium_g__norank_f__Sandaracinaceae
OTU668	1	1	0	0	0	1	0	0	1	0	1	d__Bacteria;k__norank;p__Cyanobacteria;c__Cyanobacteria;o__norank_c__Cyanobacteria;f__norank_c__Cyanobacteria;g__norank_c__Cyanobacteria;s__unclassified_g__norank_c__Cyanobacteria
OTU669	0	1	1	0	1	1	1	0	1	1	1	d__Bacteria;k__norank;p__Proteobacteria;c__Deltaproteobacteria;o__Bdellovibrionales;f__Bacteriovoracaceae;g__norank_f__Bacteriovoracaceae;s__marine_metagenome_g__norank_f__Bacteriovoracaceae
OTU670	1	1	0	1	1	1	0	1	1	1	1	d__Bacteria;k__norank;p__Cyanobacteria;c__Cyanobacteria;o__norank_c__Cyanobacteria;f__norank_c__Cyanobacteria;g__norank_c__Cyanobacteria;s__unclassified_g__norank_c__Cyanobacteria
OTU671	0	1	0	0	0	1	0	0	0	1	0	d__Bacteria;k__norank;p__Marinimicrobia__SAR406_clade_;c__norank_p__Marinimicrobia__SAR406_clade_;o__norank_p__Marinimicrobia__SAR406_clade_;f__norank_p__Marinimicrobia__SAR406_clade_;g__norank_p__Marinimicrobia__SAR406_clade_;s__unclassified_g__norank_p__Marinimicrobia__SAR406_clade_
OTU672	1	1	1	0	1	1	1	0	1	1	1	d__Bacteria;k__norank;p__Proteobacteria;c__Gammaproteobacteria;o__Gammaproteobacteria_Incertae_Sedis;f__Unknown_Family_o__Gammaproteobacteria_Incertae_Sedis;g__norank_f__Unknown_Family_o__Gammaproteobacteria_Incertae_Sedis;s__marine_metagenome_g__norank_f__Unknown_Family_o__Gammaproteobacteria_Incertae_Sedis
OTU673	1	1	1	1	1	1	1	1	1	1	0	d__Bacteria;k__norank;p__Proteobacteria;c__Alphaproteobacteria;o__Rhodospirillales;f__Rhodospirillaceae;g__norank_f__Rhodospirillaceae;s__uncultured_nuHF2_cluster_bacterium_HF0130_29D04
OTU674	0	1	1	0	1	1	1	0	1	1	1	d__Bacteria;k__norank;p__Marinimicrobia__SAR406_clade_;c__norank_p__Marinimicrobia__SAR406_clade_;o__norank_p__Marinimicrobia__SAR406_clade_;f__norank_p__Marinimicrobia__SAR406_clade_;g__norank_p__Marinimicrobia__SAR406_clade_;s__unclassified_g__norank_p__Marinimicrobia__SAR406_clade_
OTU675	0	1	1	1	0	1	1	1	0	0	0	d__Bacteria;k__norank;p__Proteobacteria;c__Gammaproteobacteria;o__Gammaproteobacteria_Incertae_Sedis;f__Unknown_Family_o__Gammaproteobacteria_Incertae_Sedis;g__norank_f__Unknown_Family_o__Gammaproteobacteria_Incertae_Sedis;s__uncultured_marine_bacterium_g__norank_f__Unknown_Family_o__Gammaproteobacteria_Incertae_Sedis
OTU676	1	1	0	0	1	1	0	0	1	1	1	d__Bacteria;k__norank;p__Cyanobacteria;c__Cyanobacteria;o__norank_c__Cyanobacteria;f__norank_c__Cyanobacteria;g__norank_c__Cyanobacteria;s__unidentified_marine_bacterioplankton_g__norank_c__Cyanobacteria
OTU677	1	1	1	0	1	1	1	0	1	1	1	d__Bacteria;k__norank;p__Cyanobacteria;c__Cyanobacteria;o__norank_c__Cyanobacteria;f__norank_c__Cyanobacteria;g__norank_c__Cyanobacteria;s__Aureococcus_anophagefferens
OTU678	0	1	0	0	0	1	0	0	0	0	0	d__Bacteria;k__norank;p__Bacteroidetes;c__Flavobacteriia;o__Flavobacteriales;f__Flavobacteriaceae;g__NS5_marine_group;s__uncultured_Flavobacteriia_bacterium_g__NS5_marine_group
OTU679	0	0	0	0	0	1	1	0	0	0	0	d__Bacteria;k__norank;p__Proteobacteria;c__Alphaproteobacteria;o__Rickettsiales;f__Mitochondria;g__norank_f__Mitochondria;s__unclassified_g__norank_f__Mitochondria
OTU680	1	1	1	0	1	1	1	0	1	1	1	d__Bacteria;k__norank;p__Marinimicrobia__SAR406_clade_;c__norank_p__Marinimicrobia__SAR406_clade_;o__norank_p__Marinimicrobia__SAR406_clade_;f__norank_p__Marinimicrobia__SAR406_clade_;g__norank_p__Marinimicrobia__SAR406_clade_;s__unclassified_g__norank_p__Marinimicrobia__SAR406_clade_
OTU681	0	0	1	0	0	1	1	0	0	0	0	d__Bacteria;k__norank;p__Proteobacteria;c__Deltaproteobacteria;o__Desulfurellales;f__Desulfurellaceae;g__H16;s__uncultured_delta_proteobacterium_g__H16
OTU682	0	0	0	1	1	1	1	0	0	0	0	d__Bacteria;k__norank;p__Cyanobacteria;c__Cyanobacteria;o__Obscuribacterales;f__norank_o__Obscuribacterales;g__norank_o__Obscuribacterales;s__uncultured_cyanobacterium_g__norank_o__Obscuribacterales
OTU683	0	0	1	1	0	0	1	1	0	0	0	d__Bacteria;k__norank;p__unclassified_k__norank;c__unclassified_k__norank;o__unclassified_k__norank;f__unclassified_k__norank;g__unclassified_k__norank;s__unclassified_k__norank
OTU684	0	0	1	1	0	0	1	1	0	0	0	d__Bacteria;k__norank;p__Proteobacteria;c__Alphaproteobacteria;o__Rhodospirillales;f__Rhodospirillaceae;g__Magnetospira;s__unclassified_g__Magnetospira
OTU685	0	0	1	1	0	0	1	1	0	0	0	d__Bacteria;k__norank;p__Chloroflexi;c__SAR202_clade;o__norank_c__SAR202_clade;f__norank_c__SAR202_clade;g__norank_c__SAR202_clade;s__uncultured_bacterium_g__norank_c__SAR202_clade
OTU686	0	1	1	1	0	1	1	1	0	0	0	d__Bacteria;k__norank;p__Proteobacteria;c__Alphaproteobacteria;o__Rhodospirillales;f__Rhodospirillaceae;g__AEGEAN-169_marine_group;s__uncultured_alpha_proteobacterium_g__AEGEAN-169_marine_group
OTU687	0	0	0	0	0	0	1	0	0	0	0	d__Bacteria;k__norank;p__Proteobacteria;c__Alphaproteobacteria;o__Rhodospirillales;f__Rhodospirillaceae;g__AEGEAN-169_marine_group;s__unclassified_g__AEGEAN-169_marine_group
OTU688	0	0	1	1	0	0	1	1	0	0	0	d__Bacteria;k__norank;p__Planctomycetes;c__Pla3_lineage;o__norank_c__Pla3_lineage;f__norank_c__Pla3_lineage;g__norank_c__Pla3_lineage;s__hydrothermal_vent_metagenome_g__norank_c__Pla3_lineage
OTU689	0	0	1	0	0	0	1	0	0	0	0	d__Bacteria;k__norank;p__Nitrospinae;c__Nitrospinia;o__Nitrospinales;f__Nitrospinaceae;g__unclassified_f__Nitrospinaceae;s__unclassified_f__Nitrospinaceae
OTU690	0	1	1	0	0	1	1	0	0	0	0	d__Bacteria;k__norank;p__Cyanobacteria;c__Cyanobacteria;o__norank_c__Cyanobacteria;f__norank_c__Cyanobacteria;g__norank_c__Cyanobacteria;s__marine_metagenome_g__norank_c__Cyanobacteria
OTU691	0	0	1	0	0	0	1	1	0	0	0	d__Bacteria;k__norank;p__Chloroflexi;c__SAR202_clade;o__norank_c__SAR202_clade;f__norank_c__SAR202_clade;g__norank_c__SAR202_clade;s__unclassified_g__norank_c__SAR202_clade
OTU692	0	0	1	1	0	0	1	1	0	0	0	d__Bacteria;k__norank;p__Proteobacteria;c__Deltaproteobacteria;o__unclassified_c__Deltaproteobacteria;f__unclassified_c__Deltaproteobacteria;g__unclassified_c__Deltaproteobacteria;s__unclassified_c__Deltaproteobacteria
OTU693	0	0	1	1	0	0	1	1	0	0	0	d__Bacteria;k__norank;p__Proteobacteria;c__Alphaproteobacteria;o__Rhodospirillales;f__unclassified_o__Rhodospirillales;g__unclassified_o__Rhodospirillales;s__unclassified_o__Rhodospirillales
OTU694	0	0	1	1	0	0	1	0	0	0	0	d__Bacteria;k__norank;p__Acidobacteria;c__Acidobacteria;o__norank_c__Acidobacteria;f__norank_c__Acidobacteria;g__norank_c__Acidobacteria;s__unclassified_g__norank_c__Acidobacteria
OTU695	0	0	1	1	0	0	1	1	0	0	0	d__Bacteria;k__norank;p__Chloroflexi;c__SAR202_clade;o__norank_c__SAR202_clade;f__norank_c__SAR202_clade;g__norank_c__SAR202_clade;s__marine_metagenome_g__norank_c__SAR202_clade
OTU696	0	0	1	1	0	0	1	1	0	0	0	d__Bacteria;k__norank;p__Chloroflexi;c__SAR202_clade;o__norank_c__SAR202_clade;f__norank_c__SAR202_clade;g__norank_c__SAR202_clade;s__unclassified_g__norank_c__SAR202_clade
OTU697	0	0	0	0	0	0	1	1	0	0	0	d__Bacteria;k__norank;p__Proteobacteria;c__Deltaproteobacteria;o__Bdellovibrionales;f__Bacteriovoracaceae;g__Peredibacter;s__unclassified_g__Peredibacter
OTU698	0	0	1	0	0	1	1	1	0	0	0	d__Bacteria;k__norank;p__Bacteroidetes;c__Sphingobacteriia;o__Sphingobacteriales;f__Saprospiraceae;g__norank_f__Saprospiraceae;s__marine_metagenome_g__norank_f__Saprospiraceae
OTU699	0	0	1	1	0	1	1	1	0	0	0	d__Bacteria;k__norank;p__Cyanobacteria;c__Cyanobacteria;o__norank_c__Cyanobacteria;f__norank_c__Cyanobacteria;g__norank_c__Cyanobacteria;s__uncultured_Candidatus_Marinimicrobia_bacterium_g__norank
OTU700	0	0	0	0	1	1	1	1	0	0	0	d__Bacteria;k__norank;p__Proteobacteria;c__Alphaproteobacteria;o__Rhizobiales;f__Hyphomicrobiaceae;g__Hyphomicrobium;s__uncultured_Rhizobiales_bacterium_g__Hyphomicrobium
OTU701	0	0	1	0	0	0	1	0	0	0	0	d__Bacteria;k__norank;p__Bacteroidetes;c__Sphingobacteriia;o__Sphingobacteriales;f__Saprospiraceae;g__norank_f__Saprospiraceae;s__uncultured_Saprospiraceae_bacterium_g__norank
OTU702	0	0	0	0	1	1	1	1	1	0	0	d__Bacteria;k__norank;p__Proteobacteria;c__Alphaproteobacteria;o__Rhodospirillales;f__Acetobacteraceae;g__Rhodovarius;s__Rhodovarius_lipocyclicus
OTU703	0	0	0	1	0	0	1	1	0	0	0	d__Bacteria;k__norank;p__Proteobacteria;c__Alphaproteobacteria;o__Rhodospirillales;f__Rhodospirillaceae;g__norank_f__Rhodospirillaceae;s__unclassified_g__norank_f__Rhodospirillaceae
OTU704	0	0	1	1	0	0	1	1	0	0	0	d__Bacteria;k__norank;p__Proteobacteria;c__Alphaproteobacteria;o__Rhodospirillales;f__Rhodospirillaceae;g__norank_f__Rhodospirillaceae;s__uncultured_marine_microorganism_g__norank_f__Rhodospirillaceae
OTU705	0	0	1	1	0	1	1	1	0	0	0	d__Bacteria;k__norank;p__Planctomycetes;c__Phycisphaerae;o__Phycisphaerales;f__Phycisphaeraceae;g__FS140-16B-02_marine_group;s__uncultured_Phycisphaeraceae_bacterium_g__FS140-16B-02_marine_group
OTU706	0	0	1	0	0	0	1	0	0	0	0	d__Bacteria;k__norank;p__Proteobacteria;c__Deltaproteobacteria;o__Oligoflexales;f__Oligoflexaceae;g__norank_f__Oligoflexaceae;s__unclassified_g__norank_f__Oligoflexaceae
OTU707	0	0	1	0	0	0	1	0	0	0	0	d__Bacteria;k__norank;p__Chloroflexi;c__SAR202_clade;o__norank_c__SAR202_clade;f__norank_c__SAR202_clade;g__norank_c__SAR202_clade;s__unclassified_g__norank_c__SAR202_clade
OTU708	0	0	1	0	0	0	1	0	0	0	0	d__Bacteria;k__norank;p__Chloroflexi;c__SAR202_clade;o__norank_c__SAR202_clade;f__norank_c__SAR202_clade;g__norank_c__SAR202_clade;s__uncultured_bacterium_g__norank_c__SAR202_clade
OTU709	0	0	1	0	0	0	1	0	0	0	0	d__Bacteria;k__norank;p__Proteobacteria;c__Gammaproteobacteria;o__E01-9C-26_marine_group;f__norank_o__E01-9C-26_marine_group;g__norank_o__E01-9C-26_marine_group;s__uncultured_marine_microorganism_g__norank_o__E01-9C-26_marine_group
OTU710	0	0	1	0	0	0	1	0	0	0	0	d__Bacteria;k__norank;p__Proteobacteria;c__Alphaproteobacteria;o__unclassified_c__Alphaproteobacteria;f__unclassified_c__Alphaproteobacteria;g__unclassified_c__Alphaproteobacteria;s__unclassified_c__Alphaproteobacteria
OTU711	0	0	1	1	0	0	1	0	0	0	0	d__Bacteria;k__norank;p__Chloroflexi;c__SAR202_clade;o__norank_c__SAR202_clade;f__norank_c__SAR202_clade;g__norank_c__SAR202_clade;s__unclassified_g__norank_c__SAR202_clade
OTU712	0	0	0	0	0	0	1	0	0	0	0	d__Bacteria;k__norank;p__Proteobacteria;c__Alphaproteobacteria;o__Rhodospirillales;f__Rhodospirillaceae;g__norank_f__Rhodospirillaceae;s__uncultured_bacterium_g__norank_f__Rhodospirillaceae
OTU713	0	0	1	0	0	0	1	0	0	0	0	d__Bacteria;k__norank;p__Chloroflexi;c__SAR202_clade;o__norank_c__SAR202_clade;f__norank_c__SAR202_clade;g__norank_c__SAR202_clade;s__unclassified_g__norank_c__SAR202_clade
OTU714	0	0	1	0	0	0	1	0	0	0	0	d__Bacteria;k__norank;p__Proteobacteria;c__Deltaproteobacteria;o__Desulfurellales;f__Desulfurellaceae;g__G55;s__unclassified_g__G55
OTU715	0	0	1	1	0	0	1	1	0	0	0	d__Bacteria;k__norank;p__Proteobacteria;c__Alphaproteobacteria;o__Rickettsiales;f__S25-593;g__norank_f__S25-593;s__marine_metagenome_g__norank_f__S25-593
OTU716	0	0	1	1	0	0	1	1	0	0	0	d__Bacteria;k__norank;p__Proteobacteria;c__Gammaproteobacteria;o__Oceanospirillales;f__SAR86_clade;g__norank_f__SAR86_clade;s__unclassified_g__norank_f__SAR86_clade
OTU717	0	0	1	1	0	0	1	1	0	0	0	d__Bacteria;k__norank;p__Chloroflexi;c__SAR202_clade;o__norank_c__SAR202_clade;f__norank_c__SAR202_clade;g__norank_c__SAR202_clade;s__unclassified_g__norank_c__SAR202_clade
OTU718	0	0	1	1	0	0	1	1	0	0	0	d__Bacteria;k__norank;p__Chloroflexi;c__SAR202_clade;o__norank_c__SAR202_clade;f__norank_c__SAR202_clade;g__norank_c__SAR202_clade;s__unclassified_g__norank_c__SAR202_clade
OTU719	0	0	1	1	0	0	1	1	0	0	0	d__Bacteria;k__norank;p__Proteobacteria;c__Alphaproteobacteria;o__Rhodospirillales;f__Rhodospirillaceae;g__AEGEAN-169_marine_group;s__uncultured_bacterium_g__AEGEAN-169_marine_group
OTU720	0	0	1	0	0	1	1	1	0	0	0	d__Bacteria;k__norank;p__Proteobacteria;c__Deltaproteobacteria;o__Myxococcales;f__P3OB-42;g__norank_f__P3OB-42;s__unclassified_g__norank_f__P3OB-42
OTU721	0	0	1	0	0	0	1	0	0	0	0	d__Bacteria;k__norank;p__Proteobacteria;c__Deltaproteobacteria;o__NB1-j;f__norank_o__NB1-j;g__norank_o__NB1-j;s__uncultured_myxobacterium_HF0200_01L06
OTU722	0	0	1	1	0	0	1	1	0	0	0	d__Bacteria;k__norank;p__Planctomycetes;c__Phycisphaerae;o__Phycisphaerales;f__Phycisphaeraceae;g__norank_f__Phycisphaeraceae;s__unclassified_g__norank_f__Phycisphaeraceae
OTU723	0	0	1	1	0	0	1	1	0	0	0	d__Bacteria;k__norank;p__Acidobacteria;c__Acidobacteria;o__norank_c__Acidobacteria;f__norank_c__Acidobacteria;g__norank_c__Acidobacteria;s__uncultured_marine_microorganism_g__norank_c__Acidobacteria
OTU724	0	0	1	0	0	0	1	1	0	0	0	d__Bacteria;k__norank;p__Cyanobacteria;c__Cyanobacteria;o__norank_c__Cyanobacteria;f__norank_c__Cyanobacteria;g__norank_c__Cyanobacteria;s__uncultured_Candidatus_Marinimicrobia_bacterium_g__norank
OTU725	0	0	1	1	0	0	1	1	0	0	0	d__Bacteria;k__norank;p__Acidobacteria;c__Acidobacteria;o__norank_c__Acidobacteria;f__norank_c__Acidobacteria;g__norank_c__Acidobacteria;s__uncultured_bacterium_KM3-25-B4
OTU726	0	0	1	1	0	0	1	1	0	0	0	d__Bacteria;k__norank;p__Proteobacteria;c__Deltaproteobacteria;o__NB1-j;f__norank_o__NB1-j;g__norank_o__NB1-j;s__unclassified_g__norank_o__NB1-j
OTU727	0	1	1	0	0	1	1	0	0	0	0	d__Bacteria;k__norank;p__Chloroflexi;c__JG30-KF-CM66;o__norank_c__JG30-KF-CM66;f__norank_c__JG30-KF-CM66;g__norank_c__JG30-KF-CM66;s__marine_metagenome_g__norank_c__JG30-KF-CM66
OTU728	0	1	1	1	0	1	1	1	0	0	0	d__Bacteria;k__norank;p__Bacteroidetes;c__Flavobacteriia;o__Flavobacteriales;f__NS7_marine_group;g__norank_f__NS7_marine_group;s__uncultured_bacterium_g__norank_f__NS7_marine_group
OTU729	0	0	1	0	0	0	1	0	0	0	0	d__Bacteria;k__norank;p__Chloroflexi;c__JG30-KF-CM66;o__norank_c__JG30-KF-CM66;f__norank_c__JG30-KF-CM66;g__norank_c__JG30-KF-CM66;s__uncultured_Chloroflexi_bacterium_g__norank_c__JG30-KF-CM66
OTU730	0	1	1	1	0	1	1	1	0	0	0	d__Bacteria;k__norank;p__Planctomycetes;c__Phycisphaerae;o__Phycisphaerales;f__Phycisphaeraceae;g__FS140-16B-02_marine_group;s__unclassified_g__FS140-16B-02_marine_group
OTU731	1	1	1	1	1	1	1	1	1	1	1	d__Bacteria;k__norank;p__Proteobacteria;c__Alphaproteobacteria;o__SAR11_clade;f__Surface_2;g__norank_f__Surface_2;s__unclassified_g__norank_f__Surface_2
OTU732	0	0	0	0	0	0	1	1	0	0	0	d__Bacteria;k__norank;p__Proteobacteria;c__Alphaproteobacteria;o__Rhodospirillales;f__Rhodospirillaceae;g__unclassified_f__Rhodospirillaceae;s__unclassified_f__Rhodospirillaceae
OTU733	1	0	0	1	1	1	1	1	1	1	1	d__Bacteria;k__norank;p__Proteobacteria;c__Alphaproteobacteria;o__Sphingomonadales;f__Sphingomonadaceae;g__Sphingobium;s__unclassified_g__Sphingobium
OTU734	0	0	1	1	0	0	1	1	0	0	0	d__Bacteria;k__norank;p__Chloroflexi;c__Anaerolineae;o__Anaerolineales;f__Anaerolineaceae;g__norank_f__Anaerolineaceae;s__marine_metagenome_g__norank_f__Anaerolineaceae
OTU735	0	0	1	0	0	0	1	0	0	0	0	d__Bacteria;k__norank;p__Chloroflexi;c__SAR202_clade;o__norank_c__SAR202_clade;f__norank_c__SAR202_clade;g__norank_c__SAR202_clade;s__uncultured_marine_microorganism_g__norank_c__SAR202_clade
OTU736	0	0	0	0	0	0	1	0	0	0	0	d__Bacteria;k__norank;p__Proteobacteria;c__Gammaproteobacteria;o__Legionellales;f__Coxiellaceae;g__Coxiella;s__unclassified_g__Coxiella
OTU737	0	0	1	1	0	0	1	1	0	0	0	d__Bacteria;k__norank;p__Proteobacteria;c__Alphaproteobacteria;o__Rhodospirillales;f__Rhodospirillaceae;g__norank_f__Rhodospirillaceae;s__unclassified_g__norank_f__Rhodospirillaceae
OTU738	0	0	1	1	0	0	1	1	0	0	0	d__Bacteria;k__norank;p__Proteobacteria;c__Alphaproteobacteria;o__Rhodospirillales;f__AT-s3-44;g__norank_f__AT-s3-44;s__uncultured_bacterium_KM3-69-D9
OTU739	0	0	1	0	0	1	1	0	0	0	0	d__Bacteria;k__norank;p__Chloroflexi;c__SAR202_clade;o__norank_c__SAR202_clade;f__norank_c__SAR202_clade;g__norank_c__SAR202_clade;s__marine_metagenome_g__norank_c__SAR202_clade
OTU740	0	0	1	0	0	0	1	0	0	0	0	d__Bacteria;k__norank;p__Chloroflexi;c__SAR202_clade;o__norank_c__SAR202_clade;f__norank_c__SAR202_clade;g__norank_c__SAR202_clade;s__unclassified_g__norank_c__SAR202_clade
OTU741	0	0	1	1	0	0	1	1	0	0	0	d__Bacteria;k__norank;p__Planctomycetes;c__OM190;o__norank_c__OM190;f__norank_c__OM190;g__norank_c__OM190;s__uncultured_planctomycete_g__norank_c__OM190
OTU742	0	1	1	1	0	0	1	1	0	0	0	d__Bacteria;k__norank;p__Marinimicrobia__SAR406_clade_;c__norank_p__Marinimicrobia__SAR406_clade_;o__norank_p__Marinimicrobia__SAR406_clade_;f__norank_p__Marinimicrobia__SAR406_clade_;g__norank_p__Marinimicrobia__SAR406_clade_;s__unclassified_g__norank_p__Marinimicrobia__SAR406_clade_
OTU743	0	0	1	1	0	0	1	1	0	0	0	d__Bacteria;k__norank;p__Marinimicrobia__SAR406_clade_;c__norank_p__Marinimicrobia__SAR406_clade_;o__norank_p__Marinimicrobia__SAR406_clade_;f__norank_p__Marinimicrobia__SAR406_clade_;g__norank_p__Marinimicrobia__SAR406_clade_;s__marine_metagenome_g__norank_p__Marinimicrobia__SAR406_clade_
OTU744	0	1	1	1	1	1	1	1	0	1	1	d__Bacteria;k__norank;p__Proteobacteria;c__Deltaproteobacteria;o__SAR324_clade_Marine_group_B_;f__norank_o__SAR324_clade_Marine_group_B_;g__norank_o__SAR324_clade_Marine_group_B_;s__unclassified_g__norank_o__SAR324_clade_Marine_group_B_
OTU745	0	0	1	1	0	0	1	1	0	0	0	d__Bacteria;k__norank;p__Marinimicrobia__SAR406_clade_;c__norank_p__Marinimicrobia__SAR406_clade_;o__norank_p__Marinimicrobia__SAR406_clade_;f__norank_p__Marinimicrobia__SAR406_clade_;g__norank_p__Marinimicrobia__SAR406_clade_;s__unclassified_g__norank_p__Marinimicrobia__SAR406_clade_
OTU746	0	0	1	0	0	1	1	0	0	0	0	d__Bacteria;k__norank;p__Cyanobacteria;c__Cyanobacteria;o__norank_c__Cyanobacteria;f__norank_c__Cyanobacteria;g__norank_c__Cyanobacteria;s__unclassified_g__norank_c__Cyanobacteria
OTU747	0	0	1	0	0	1	1	1	0	0	0	d__Bacteria;k__norank;p__Proteobacteria;c__Alphaproteobacteria;o__Rhodospirillales;f__Rhodospirillaceae;g__Magnetospira;s__unclassified_g__Magnetospira
OTU748	0	0	0	1	0	0	1	1	0	0	0	d__Bacteria;k__norank;p__Marinimicrobia__SAR406_clade_;c__norank_p__Marinimicrobia__SAR406_clade_;o__norank_p__Marinimicrobia__SAR406_clade_;f__norank_p__Marinimicrobia__SAR406_clade_;g__norank_p__Marinimicrobia__SAR406_clade_;s__uncultured_bacterium_g__norank_p__Marinimicrobia__SAR406_clade_
OTU749	0	0	0	0	0	1	1	0	0	0	0	d__Bacteria;k__norank;p__Proteobacteria;c__Betaproteobacteria;o__Neisseriales;f__Neisseriaceae;g__norank_f__Neisseriaceae;s__uncultured_beta_proteobacterium_g__norank_f__Neisseriaceae
OTU750	0	0	1	1	0	0	1	1	0	0	0	d__Bacteria;k__norank;p__Chloroflexi;c__SAR202_clade;o__norank_c__SAR202_clade;f__norank_c__SAR202_clade;g__norank_c__SAR202_clade;s__uncultured_marine_microorganism_g__norank_c__SAR202_clade
OTU751	0	0	1	1	0	0	1	1	0	0	0	d__Bacteria;k__norank;p__unclassified_k__norank;c__unclassified_k__norank;o__unclassified_k__norank;f__unclassified_k__norank;g__unclassified_k__norank;s__unclassified_k__norank
OTU752	0	0	1	0	0	0	1	1	0	0	0	d__Bacteria;k__norank;p__Proteobacteria;c__Gammaproteobacteria;o__Cellvibrionales;f__Cellvibrionaceae;g__norank_f__Cellvibrionaceae;s__Gammaproteobacteria_bacterium_SCGC_AAA003-E02
OTU753	0	0	0	0	0	0	1	0	0	0	0	d__Bacteria;k__norank;p__Proteobacteria;c__Gammaproteobacteria;o__unclassified_c__Gammaproteobacteria;f__unclassified_c__Gammaproteobacteria;g__unclassified_c__Gammaproteobacteria;s__unclassified_c__Gammaproteobacteria
OTU754	0	0	1	1	0	0	1	1	0	0	0	d__Bacteria;k__norank;p__Acidobacteria;c__Acidobacteria;o__norank_c__Acidobacteria;f__norank_c__Acidobacteria;g__norank_c__Acidobacteria;s__uncultured_bacterium_KM4-9-H7
OTU755	0	0	1	0	0	0	1	1	0	0	0	d__Bacteria;k__norank;p__Chloroflexi;c__SAR202_clade;o__norank_c__SAR202_clade;f__norank_c__SAR202_clade;g__norank_c__SAR202_clade;s__Chloroflexi_bacterium_SCGC_AB-629-P13
OTU756	0	0	1	1	0	0	1	1	0	0	0	d__Bacteria;k__norank;p__Chloroflexi;c__SAR202_clade;o__norank_c__SAR202_clade;f__norank_c__SAR202_clade;g__norank_c__SAR202_clade;s__unclassified_g__norank_c__SAR202_clade
OTU757	1	1	1	1	0	1	1	1	0	0	0	d__Bacteria;k__norank;p__Bacteroidetes;c__Flavobacteriia;o__Flavobacteriales;f__NS9_marine_group;g__norank_f__NS9_marine_group;s__unclassified_g__norank_f__NS9_marine_group
OTU758	0	1	1	1	0	1	1	1	0	0	0	d__Bacteria;k__norank;p__Marinimicrobia__SAR406_clade_;c__norank_p__Marinimicrobia__SAR406_clade_;o__norank_p__Marinimicrobia__SAR406_clade_;f__norank_p__Marinimicrobia__SAR406_clade_;g__norank_p__Marinimicrobia__SAR406_clade_;s__uncultured_bacterium_g__norank_p__Marinimicrobia__SAR406_clade_
OTU759	0	0	1	1	0	0	1	1	0	0	0	d__Bacteria;k__norank;p__Planctomycetes;c__Phycisphaerae;o__Phycisphaerales;f__Phycisphaeraceae;g__JL-ETNP-F27;s__uncultured_bacterium_g__JL-ETNP-F27
OTU760	1	0	0	0	1	1	1	1	0	0	0	d__Bacteria;k__norank;p__Proteobacteria;c__Betaproteobacteria;o__Burkholderiales;f__Comamonadaceae;g__unclassified_f__Comamonadaceae;s__unclassified_f__Comamonadaceae
OTU761	0	1	1	1	0	1	1	1	0	0	0	d__Bacteria;k__norank;p__Planctomycetes;c__Phycisphaerae;o__Phycisphaerales;f__Phycisphaeraceae;g__FS140-16B-02_marine_group;s__uncultured_bacterium_g__FS140-16B-02_marine_group
OTU762	0	0	0	0	0	0	1	0	0	0	0	d__Bacteria;k__norank;p__Proteobacteria;c__Gammaproteobacteria;o__E01-9C-26_marine_group;f__norank_o__E01-9C-26_marine_group;g__norank_o__E01-9C-26_marine_group;s__uncultured_marine_microorganism_g__norank_o__E01-9C-26_marine_group
OTU763	1	0	0	0	0	0	1	1	0	0	0	d__Bacteria;k__norank;p__Bacteroidetes;c__Flavobacteriia;o__Flavobacteriales;f__Cryomorphaceae;g__norank_f__Cryomorphaceae;s__uncultured_bacterium_g__norank_f__Cryomorphaceae
OTU764	0	1	1	1	0	1	1	1	0	0	0	d__Bacteria;k__norank;p__Planctomycetes;c__Phycisphaerae;o__Phycisphaerales;f__Phycisphaeraceae;g__JL-ETNP-F27;s__uncultured_planctomycete_g__JL-ETNP-F27
OTU765	0	0	1	1	0	0	1	1	0	0	0	d__Bacteria;k__norank;p__Chloroflexi;c__SAR202_clade;o__norank_c__SAR202_clade;f__norank_c__SAR202_clade;g__norank_c__SAR202_clade;s__unclassified_g__norank_c__SAR202_clade
OTU766	0	0	1	1	0	0	1	1	0	0	0	d__Bacteria;k__norank;p__Gracilibacteria;c__norank_p__Gracilibacteria;o__norank_p__Gracilibacteria;f__norank_p__Gracilibacteria;g__norank_p__Gracilibacteria;s__uncultured_bacterium_g__norank_p__Gracilibacteria
OTU767	0	0	1	0	0	0	1	0	0	0	0	d__Bacteria;k__norank;p__Proteobacteria;c__Gammaproteobacteria;o__Oceanospirillales;f__Oleiphilaceae;g__Oleiphilus;s__uncultured_bacterium_g__Oleiphilus
OTU768	0	0	1	0	0	0	1	0	0	0	0	d__Bacteria;k__norank;p__Chloroflexi;c__SAR202_clade;o__norank_c__SAR202_clade;f__norank_c__SAR202_clade;g__norank_c__SAR202_clade;s__unidentified_eubacterium_clone_SAR202
OTU769	0	0	0	0	1	0	1	0	0	0	0	d__Bacteria;k__norank;p__Bacteroidetes;c__Sphingobacteriia;o__Sphingobacteriales;f__env.OPS_17;g__norank_f__env.OPS_17;s__uncultured_bacterium_g__norank_f__env.OPS_17
OTU770	0	0	1	0	0	0	1	0	0	0	0	d__Bacteria;k__norank;p__Nitrospinae;c__Nitrospinia;o__Nitrospinales;f__Nitrospinaceae;g__Nitrospina;s__unclassified_g__Nitrospina
OTU771	1	1	1	1	1	1	1	1	1	1	1	d__Bacteria;k__norank;p__Proteobacteria;c__Gammaproteobacteria;o__Alteromonadales;f__Alteromonadaceae;g__Aestuariibacter;s__unclassified_g__Aestuariibacter
OTU772	0	0	1	1	0	0	1	1	0	0	0	d__Bacteria;k__norank;p__Chloroflexi;c__SAR202_clade;o__norank_c__SAR202_clade;f__norank_c__SAR202_clade;g__norank_c__SAR202_clade;s__unclassified_g__norank_c__SAR202_clade
OTU773	0	0	1	1	0	1	1	1	0	0	0	d__Bacteria;k__norank;p__Nitrospinae;c__Nitrospinia;o__Nitrospinales;f__Nitrospinaceae;g__norank_f__Nitrospinaceae;s__uncultured_marine_microorganism_g__norank_f__Nitrospinaceae
OTU774	0	0	1	0	0	0	1	1	0	0	0	d__Bacteria;k__norank;p__Chloroflexi;c__SAR202_clade;o__norank_c__SAR202_clade;f__norank_c__SAR202_clade;g__norank_c__SAR202_clade;s__unclassified_g__norank_c__SAR202_clade
OTU775	0	0	1	1	0	0	1	1	0	0	0	d__Bacteria;k__norank;p__Proteobacteria;c__Alphaproteobacteria;o__Rhodospirillales;f__Rhodospirillaceae;g__AEGEAN-169_marine_group;s__unclassified_g__AEGEAN-169_marine_group
OTU776	0	0	1	1	0	1	1	1	0	0	0	d__Bacteria;k__norank;p__Actinobacteria;c__Actinobacteria;o__Acidimicrobiales;f__Sva0996_marine_group;g__norank_f__Sva0996_marine_group;s__unclassified_g__norank_f__Sva0996_marine_group
OTU777	0	0	0	0	0	0	1	1	0	0	0	d__Bacteria;k__norank;p__Planctomycetes;c__Pla3_lineage;o__norank_c__Pla3_lineage;f__norank_c__Pla3_lineage;g__norank_c__Pla3_lineage;s__unclassified_g__norank_c__Pla3_lineage
OTU778	0	0	1	0	0	1	1	1	0	0	0	d__Bacteria;k__norank;p__Cyanobacteria;c__Cyanobacteria;o__norank_c__Cyanobacteria;f__norank_c__Cyanobacteria;g__norank_c__Cyanobacteria;s__uncultured_Candidatus_Marinimicrobia_bacterium_g__norank
OTU779	0	0	1	1	0	0	1	1	0	0	0	d__Bacteria;k__norank;p__Nitrospinae;c__Nitrospinia;o__Nitrospinales;f__Nitrospinaceae;g__Nitrospina;s__uncultured_organism_g__Nitrospina
OTU780	0	0	1	1	0	0	1	1	0	0	0	d__Bacteria;k__norank;p__Proteobacteria;c__Gammaproteobacteria;o__Salinisphaerales;f__Salinisphaeraceae;g__ZD0417_marine_group;s__uncultured_bacterium_g__ZD0417_marine_group
OTU781	0	0	1	1	0	0	1	1	0	0	0	d__Bacteria;k__norank;p__Chloroflexi;c__SAR202_clade;o__norank_c__SAR202_clade;f__norank_c__SAR202_clade;g__norank_c__SAR202_clade;s__marine_metagenome_g__norank_c__SAR202_clade
OTU782	0	1	1	0	0	1	1	0	0	0	0	d__Bacteria;k__norank;p__Proteobacteria;c__Gammaproteobacteria;o__Salinisphaerales;f__Salinisphaeraceae;g__ZD0417_marine_group;s__Candidatus_Thioglobus_sp._REDSEA-S12_B1
OTU783	0	0	0	0	1	1	1	1	0	0	0	d__Bacteria;k__norank;p__Proteobacteria;c__Betaproteobacteria;o__Burkholderiales;f__Comamonadaceae;g__Rhizobacter;s__uncultured_beta_proteobacterium_g__Rhizobacter
OTU784	0	0	1	0	0	0	1	0	0	0	0	d__Bacteria;k__norank;p__Proteobacteria;c__Gammaproteobacteria;o__Oceanospirillales;f__SAR86_clade;g__norank_f__SAR86_clade;s__unclassified_g__norank_f__SAR86_clade
OTU785	0	0	1	1	0	0	1	1	0	0	0	d__Bacteria;k__norank;p__Proteobacteria;c__Gammaproteobacteria;o__Xanthomonadales;f__JTB255_marine_benthic_group;g__norank_f__JTB255_marine_benthic_group;s__uncultured_organism_g__norank_f__JTB255_marine_benthic_group
OTU786	1	1	1	0	1	1	1	1	0	1	0	d__Bacteria;k__norank;p__Proteobacteria;c__Gammaproteobacteria;o__E01-9C-26_marine_group;f__norank_o__E01-9C-26_marine_group;g__norank_o__E01-9C-26_marine_group;s__unclassified_g__norank_o__E01-9C-26_marine_group
OTU787	0	0	1	1	0	0	1	1	0	0	0	d__Bacteria;k__norank;p__Bacteroidetes;c__Sphingobacteriia;o__Sphingobacteriales;f__unclassified_o__Sphingobacteriales;g__unclassified_o__Sphingobacteriales;s__unclassified_o__Sphingobacteriales
OTU788	0	0	1	1	0	0	1	0	0	0	0	d__Bacteria;k__norank;p__Chloroflexi;c__SAR202_clade;o__norank_c__SAR202_clade;f__norank_c__SAR202_clade;g__norank_c__SAR202_clade;s__unclassified_g__norank_c__SAR202_clade
OTU789	0	0	1	1	0	0	1	1	0	0	0	d__Bacteria;k__norank;p__Proteobacteria;c__Gammaproteobacteria;o__E01-9C-26_marine_group;f__norank_o__E01-9C-26_marine_group;g__norank_o__E01-9C-26_marine_group;s__unclassified_g__norank_o__E01-9C-26_marine_group
OTU790	0	0	1	1	0	0	1	1	0	0	0	d__Bacteria;k__norank;p__Chloroflexi;c__SAR202_clade;o__norank_c__SAR202_clade;f__norank_c__SAR202_clade;g__norank_c__SAR202_clade;s__unclassified_g__norank_c__SAR202_clade
OTU791	1	1	1	1	1	1	1	1	0	1	1	d__Bacteria;k__norank;p__Proteobacteria;c__Gammaproteobacteria;o__Oceanospirillales;f__SAR86_clade;g__norank_f__SAR86_clade;s__unclassified_g__norank_f__SAR86_clade
OTU792	0	0	1	1	1	0	1	1	0	0	0	d__Bacteria;k__norank;p__Proteobacteria;c__Gammaproteobacteria;o__Xanthomonadales;f__JTB255_marine_benthic_group;g__norank_f__JTB255_marine_benthic_group;s__uncultured_marine_microorganism_g__norank_f__JTB255_marine_benthic_group
OTU793	0	0	0	0	0	0	1	0	0	0	0	d__Bacteria;k__norank;p__Cyanobacteria;c__Cyanobacteria;o__norank_c__Cyanobacteria;f__norank_c__Cyanobacteria;g__norank_c__Cyanobacteria;s__unclassified_g__norank_c__Cyanobacteria
OTU794	0	0	1	0	0	0	1	0	0	0	0	d__Bacteria;k__norank;p__Proteobacteria;c__Gammaproteobacteria;o__KI89A_clade;f__norank_o__KI89A_clade;g__norank_o__KI89A_clade;s__uncultured_marine_microorganism_g__norank_o__KI89A_clade
OTU795	1	0	0	1	1	1	1	1	1	1	0	d__Bacteria;k__norank;p__Proteobacteria;c__Gammaproteobacteria;o__Oceanospirillales;f__Oceanospirillaceae;g__Oleibacter;s__unclassified_g__Oleibacter
OTU796	0	1	1	0	0	0	1	0	0	0	0	d__Bacteria;k__norank;p__Bacteroidetes;c__Flavobacteriia;o__Flavobacteriales;f__NS9_marine_group;g__norank_f__NS9_marine_group;s__unclassified_g__norank_f__NS9_marine_group
OTU797	0	0	1	0	0	0	1	0	0	0	0	d__Bacteria;k__norank;p__Marinimicrobia__SAR406_clade_;c__norank_p__Marinimicrobia__SAR406_clade_;o__norank_p__Marinimicrobia__SAR406_clade_;f__norank_p__Marinimicrobia__SAR406_clade_;g__norank_p__Marinimicrobia__SAR406_clade_;s__unclassified_g__norank_p__Marinimicrobia__SAR406_clade_
OTU798	1	1	1	0	1	1	1	1	1	1	1	d__Bacteria;k__norank;p__Proteobacteria;c__Gammaproteobacteria;o__Legionellales;f__Coxiellaceae;g__Coxiella;s__unclassified_g__Coxiella
OTU799	0	0	1	1	0	0	1	1	0	0	0	d__Bacteria;k__norank;p__Proteobacteria;c__Gammaproteobacteria;o__Salinisphaerales;f__Salinisphaeraceae;g__ZD0417_marine_group;s__uncultured_bacterium_g__ZD0417_marine_group
OTU800	0	0	1	0	0	1	1	0	0	0	0	d__Bacteria;k__norank;p__Planctomycetes;c__OM190;o__norank_c__OM190;f__norank_c__OM190;g__norank_c__OM190;s__uncultured_Planctomycetaceae_bacterium_g__norank_c__OM190
OTU801	0	0	1	0	0	1	1	1	0	1	0	d__Bacteria;k__norank;p__Proteobacteria;c__Gammaproteobacteria;o__Oceanospirillales;f__CrystalBog021C3;g__norank_f__CrystalBog021C3;s__unclassified_g__norank_f__CrystalBog021C3
OTU802	0	0	0	0	1	1	1	1	0	0	0	d__Bacteria;k__norank;p__Proteobacteria;c__Betaproteobacteria;o__Burkholderiales;f__Oxalobacteraceae;g__Paucimonas;s__unclassified_g__Paucimonas
OTU803	0	0	1	0	0	0	1	0	0	0	0	d__Bacteria;k__norank;p__Chloroflexi;c__TK10;o__norank_c__TK10;f__norank_c__TK10;g__norank_c__TK10;s__unclassified_g__norank_c__TK10
OTU804	0	0	1	0	0	0	1	0	0	0	0	d__Bacteria;k__norank;p__Chloroflexi;c__SAR202_clade;o__norank_c__SAR202_clade;f__norank_c__SAR202_clade;g__norank_c__SAR202_clade;s__unclassified_g__norank_c__SAR202_clade
OTU805	0	0	1	1	0	0	1	1	0	0	0	d__Bacteria;k__norank;p__Chloroflexi;c__SAR202_clade;o__norank_c__SAR202_clade;f__norank_c__SAR202_clade;g__norank_c__SAR202_clade;s__uncultured_marine_microorganism_g__norank_c__SAR202_clade
OTU806	0	0	0	0	1	1	1	1	0	0	0	d__Bacteria;k__norank;p__Proteobacteria;c__Betaproteobacteria;o__Rhodocyclales;f__Rhodocyclaceae;g__Sulfuritalea;s__uncultured_bacterium_g__Sulfuritalea
OTU807	0	0	1	0	0	0	1	0	0	0	0	d__Bacteria;k__norank;p__Chloroflexi;c__SAR202_clade;o__norank_c__SAR202_clade;f__norank_c__SAR202_clade;g__norank_c__SAR202_clade;s__unclassified_g__norank_c__SAR202_clade
OTU808	0	0	1	1	0	0	1	1	0	0	0	d__Bacteria;k__norank;p__Chloroflexi;c__SAR202_clade;o__norank_c__SAR202_clade;f__norank_c__SAR202_clade;g__norank_c__SAR202_clade;s__unclassified_g__norank_c__SAR202_clade
OTU809	0	0	1	1	0	0	1	1	0	0	0	d__Bacteria;k__norank;p__Chloroflexi;c__SAR202_clade;o__norank_c__SAR202_clade;f__norank_c__SAR202_clade;g__norank_c__SAR202_clade;s__uncultured_marine_microorganism_g__norank_c__SAR202_clade
OTU810	0	0	1	0	0	0	1	0	0	0	0	d__Bacteria;k__norank;p__Chloroflexi;c__SAR202_clade;o__norank_c__SAR202_clade;f__norank_c__SAR202_clade;g__norank_c__SAR202_clade;s__uncultured_Chloroflexi_bacterium_g__norank_c__SAR202_clade
OTU811	0	0	1	1	0	0	1	1	0	0	0	d__Bacteria;k__norank;p__Proteobacteria;c__SPOTSOCT00m83;o__norank_c__SPOTSOCT00m83;f__norank_c__SPOTSOCT00m83;g__norank_c__SPOTSOCT00m83;s__unclassified_g__norank_c__SPOTSOCT00m83
OTU812	0	1	1	1	0	0	1	1	0	0	0	d__Bacteria;k__norank;p__Chloroflexi;c__SAR202_clade;o__norank_c__SAR202_clade;f__norank_c__SAR202_clade;g__norank_c__SAR202_clade;s__uncultured_marine_microorganism_g__norank_c__SAR202_clade
OTU813	0	0	1	0	0	0	1	0	0	0	0	d__Bacteria;k__norank;p__Chloroflexi;c__SAR202_clade;o__norank_c__SAR202_clade;f__norank_c__SAR202_clade;g__norank_c__SAR202_clade;s__uncultured_gamma_proteobacterium_g__norank_c__SAR202_clade
OTU814	0	0	1	0	0	0	1	1	0	0	0	d__Bacteria;k__norank;p__Proteobacteria;c__Gammaproteobacteria;o__KI89A_clade;f__norank_o__KI89A_clade;g__norank_o__KI89A_clade;s__unclassified_g__norank_o__KI89A_clade
OTU815	0	0	0	0	0	1	1	0	0	0	0	d__Bacteria;k__norank;p__Bacteroidetes;c__Sphingobacteriia;o__Sphingobacteriales;f__Chitinophagaceae;g__Lacibacter;s__unclassified_g__Lacibacter
OTU816	0	1	1	0	0	1	1	0	0	0	0	d__Bacteria;k__norank;p__Proteobacteria;c__Gammaproteobacteria;o__Xanthomonadales;f__JTB255_marine_benthic_group;g__norank_f__JTB255_marine_benthic_group;s__unclassified_g__norank_f__JTB255_marine_benthic_group
OTU817	0	1	1	1	0	1	1	1	0	0	0	d__Bacteria;k__norank;p__Proteobacteria;c__Alphaproteobacteria;o__SAR11_clade;f__Deep_1;g__norank_f__Deep_1;s__unclassified_g__norank_f__Deep_1
OTU818	0	0	1	1	0	0	1	1	0	0	0	d__Bacteria;k__norank;p__Proteobacteria;c__Gammaproteobacteria;o__E01-9C-26_marine_group;f__norank_o__E01-9C-26_marine_group;g__norank_o__E01-9C-26_marine_group;s__uncultured_marine_microorganism_g__norank_o__E01-9C-26_marine_group
OTU819	0	0	0	0	0	0	1	0	0	0	0	d__Bacteria;k__norank;p__Planctomycetes;c__028H05-P-BN-P5;o__norank_c__028H05-P-BN-P5;f__norank_c__028H05-P-BN-P5;g__norank_c__028H05-P-BN-P5;s__uncultured_planctomycete_g__norank_c__028H05-P-BN-P5
OTU820	0	0	1	1	0	0	1	1	0	0	0	d__Bacteria;k__norank;p__Acidobacteria;c__Acidobacteria;o__norank_c__Acidobacteria;f__norank_c__Acidobacteria;g__norank_c__Acidobacteria;s__uncultured_bacterium_KM3-47-B8
OTU821	0	0	1	1	0	0	1	1	0	0	0	d__Bacteria;k__norank;p__Proteobacteria;c__Alphaproteobacteria;o__Rhodospirillales;f__AT-s3-44;g__norank_f__AT-s3-44;s__uncultured_marine_microorganism_g__norank_f__AT-s3-44
OTU822	1	0	0	1	1	1	1	0	1	0	0	d__Bacteria;k__norank;p__Proteobacteria;c__Betaproteobacteria;o__Burkholderiales;f__Comamonadaceae;g__unclassified_f__Comamonadaceae;s__unclassified_f__Comamonadaceae
OTU823	0	0	0	0	1	1	1	1	0	0	0	d__Bacteria;k__norank;p__Proteobacteria;c__Betaproteobacteria;o__Burkholderiales;f__Comamonadaceae;g__Rhizobacter;s__unclassified_g__Rhizobacter
OTU824	0	0	1	1	0	0	1	1	0	0	0	d__Bacteria;k__norank;p__Proteobacteria;c__Gammaproteobacteria;o__Salinisphaerales;f__Salinisphaeraceae;g__ZD0417_marine_group;s__uncultured_bacterium_g__ZD0417_marine_group
OTU825	1	1	1	0	1	1	1	0	0	0	0	d__Bacteria;k__norank;p__Proteobacteria;c__Alphaproteobacteria;o__Rhodospirillales;f__Rhodospirillaceae;g__norank_f__Rhodospirillaceae;s__unclassified_g__norank_f__Rhodospirillaceae
OTU826	0	0	0	1	0	0	1	1	0	0	0	d__Bacteria;k__norank;p__Proteobacteria;c__Alphaproteobacteria;o__Rhodospirillales;f__Rhodospirillaceae;g__AEGEAN-169_marine_group;s__uncultured_bacterium_g__AEGEAN-169_marine_group
OTU827	0	0	0	1	0	0	1	1	0	0	0	d__Bacteria;k__norank;p__Proteobacteria;c__Gammaproteobacteria;o__Oceanospirillales;f__Halomonadaceae;g__Halomonas;s__Halomonas_xianhensis
OTU828	0	0	1	1	0	1	1	1	0	0	0	d__Bacteria;k__norank;p__Proteobacteria;c__Deltaproteobacteria;o__SAR324_clade_Marine_group_B_;f__norank_o__SAR324_clade_Marine_group_B_;g__norank_o__SAR324_clade_Marine_group_B_;s__uncultured_marine_bacterium_g__norank_o__SAR324_clade_Marine_group_B_
OTU829	1	1	1	1	1	1	1	1	1	1	1	d__Bacteria;k__norank;p__Proteobacteria;c__Alphaproteobacteria;o__Sphingomonadales;f__Erythrobacteraceae;g__Erythrobacter;s__Erythrobacter_citreus
OTU830	0	0	1	1	0	0	1	1	0	0	0	d__Bacteria;k__norank;p__Bacteroidetes;c__Sphingobacteriia;o__Sphingobacteriales;f__Lentimicrobiaceae;g__norank_f__Lentimicrobiaceae;s__uncultured_deep-sea_bacterium_g__norank_f__Lentimicrobiaceae
OTU831	1	0	0	0	0	1	1	1	1	1	0	d__Bacteria;k__norank;p__Proteobacteria;c__Betaproteobacteria;o__Methylophilales;f__Methylophilaceae;g__Methylotenera;s__unclassified_g__Methylotenera
OTU832	0	0	0	0	0	0	1	1	0	0	0	d__Bacteria;k__norank;p__Proteobacteria;c__Gammaproteobacteria;o__Legionellales;f__Legionellaceae;g__Legionella;s__unclassified_g__Legionella
OTU833	0	1	1	1	1	1	1	1	1	1	0	d__Bacteria;k__norank;p__Proteobacteria;c__Alphaproteobacteria;o__Sphingomonadales;f__Sphingomonadaceae;g__Novosphingobium;s__Novosphingobium_aromaticivorans
OTU834	0	0	0	0	0	0	1	1	0	0	0	d__Bacteria;k__norank;p__Bacteroidetes;c__Flavobacteriia;o__Flavobacteriales;f__NS9_marine_group;g__norank_f__NS9_marine_group;s__unclassified_g__norank_f__NS9_marine_group
OTU835	0	0	1	1	0	0	1	1	0	0	0	d__Bacteria;k__norank;p__Proteobacteria;c__Alphaproteobacteria;o__Rhodospirillales;f__Rhodospirillaceae;g__norank_f__Rhodospirillaceae;s__uncultured_bacterium_KM3-47-A6
OTU836	1	1	1	1	1	1	1	1	0	1	0	d__Bacteria;k__norank;p__Proteobacteria;c__Alphaproteobacteria;o__Rhizobiales;f__Methylobacteriaceae;g__Methylobacterium;s__unclassified_g__Methylobacterium
OTU837	0	0	0	1	1	1	1	0	0	0	0	d__Bacteria;k__norank;p__Cyanobacteria;c__Cyanobacteria;o__Obscuribacterales;f__norank_o__Obscuribacterales;g__norank_o__Obscuribacterales;s__uncultured_bacterium_g__norank_o__Obscuribacterales
OTU838	0	0	1	1	0	0	1	1	0	0	0	d__Bacteria;k__norank;p__Proteobacteria;c__Alphaproteobacteria;o__Rickettsiales;f__norank_o__Rickettsiales;g__norank_o__Rickettsiales;s__uncultured_bacterium_g__norank_o__Rickettsiales
OTU839	0	0	1	0	0	0	1	1	0	0	0	d__Bacteria;k__norank;p__Proteobacteria;c__Gammaproteobacteria;o__E01-9C-26_marine_group;f__norank_o__E01-9C-26_marine_group;g__norank_o__E01-9C-26_marine_group;s__uncultured_gamma_proteobacterium_HF0200_24F15
OTU840	0	0	1	1	0	1	1	1	0	0	0	d__Bacteria;k__norank;p__Marinimicrobia__SAR406_clade_;c__norank_p__Marinimicrobia__SAR406_clade_;o__norank_p__Marinimicrobia__SAR406_clade_;f__norank_p__Marinimicrobia__SAR406_clade_;g__norank_p__Marinimicrobia__SAR406_clade_;s__unclassified_g__norank_p__Marinimicrobia__SAR406_clade_
OTU841	0	1	1	0	0	1	1	0	0	0	0	d__Bacteria;k__norank;p__Proteobacteria;c__Alphaproteobacteria;o__Rickettsiales;f__SAR116_clade;g__norank_f__SAR116_clade;s__unclassified_g__norank_f__SAR116_clade
OTU842	0	1	1	0	0	1	1	1	0	0	0	d__Bacteria;k__norank;p__Proteobacteria;c__Alphaproteobacteria;o__Rhodospirillales;f__Rhodospirillaceae;g__AEGEAN-169_marine_group;s__uncultured_bacterium_g__AEGEAN-169_marine_group
OTU843	0	0	0	0	1	1	1	1	1	1	1	d__Bacteria;k__norank;p__Proteobacteria;c__Gammaproteobacteria;o__Oceanospirillales;f__Oceanospirillaceae;g__Oleibacter;s__uncultured_bacterium_g__Oleibacter
OTU844	0	0	1	1	0	0	1	1	0	0	0	d__Bacteria;k__norank;p__Nitrospirae;c__Nitrospira;o__norank_c__Nitrospira;f__norank_c__Nitrospira;g__Nitrospira;s__hydrothermal_vent_metagenome_g__Nitrospira
OTU845	0	0	1	1	0	0	1	1	0	0	0	d__Bacteria;k__norank;p__Marinimicrobia__SAR406_clade_;c__norank_p__Marinimicrobia__SAR406_clade_;o__norank_p__Marinimicrobia__SAR406_clade_;f__norank_p__Marinimicrobia__SAR406_clade_;g__norank_p__Marinimicrobia__SAR406_clade_;s__unclassified_g__norank_p__Marinimicrobia__SAR406_clade_
OTU846	0	0	1	1	0	0	1	1	0	0	0	d__Bacteria;k__norank;p__Proteobacteria;c__Deltaproteobacteria;o__Bdellovibrionales;f__Bdellovibrionaceae;g__OM27_clade;s__uncultured_bacterium_g__OM27_clade
OTU847	0	0	1	0	1	1	1	1	0	0	0	d__Bacteria;k__norank;p__Proteobacteria;c__Betaproteobacteria;o__Burkholderiales;f__Comamonadaceae;g__Pseudorhodoferax;s__uncultured_beta_proteobacterium_g__Pseudorhodoferax
OTU848	1	0	0	0	1	1	1	1	0	0	0	d__Bacteria;k__norank;p__Bacteroidetes;c__Sphingobacteriia;o__Sphingobacteriales;f__Chitinophagaceae;g__Sediminibacterium;s__uncultured_organism_g__Sediminibacterium
OTU849	0	1	1	0	0	1	1	0	0	0	0	d__Bacteria;k__norank;p__Proteobacteria;c__AEGEAN-245;o__norank_c__AEGEAN-245;f__norank_c__AEGEAN-245;g__norank_c__AEGEAN-245;s__unclassified_g__norank_c__AEGEAN-245
OTU850	0	0	1	0	0	0	1	0	0	0	0	d__Bacteria;k__norank;p__Nitrospirae;c__Nitrospira;o__norank_c__Nitrospira;f__norank_c__Nitrospira;g__Nitrospira;s__unclassified_g__Nitrospira
OTU851	0	0	1	1	0	0	1	1	0	0	0	d__Bacteria;k__norank;p__Proteobacteria;c__Gammaproteobacteria;o__Oceanospirillales;f__SAR86_clade;g__norank_f__SAR86_clade;s__uncultured_gamma_proteobacterium_HF4000_19M20
OTU852	0	0	1	0	0	1	1	0	0	0	0	d__Bacteria;k__norank;p__Bacteroidetes;c__Flavobacteriia;o__Flavobacteriales;f__unclassified_o__Flavobacteriales;g__unclassified_o__Flavobacteriales;s__unclassified_o__Flavobacteriales
OTU853	0	0	1	1	0	0	1	1	0	0	0	d__Bacteria;k__norank;p__Proteobacteria;c__Alphaproteobacteria;o__Rhodospirillales;f__Rhodospirillaceae;g__norank_f__Rhodospirillaceae;s__uncultured_proteobacterium_g__norank_f__Rhodospirillaceae
OTU854	0	0	1	1	0	0	1	1	0	0	0	d__Bacteria;k__norank;p__Proteobacteria;c__Alphaproteobacteria;o__Rhizobiales;f__PS1_clade;g__norank_f__PS1_clade;s__uncultured_marine_microorganism_g__norank_f__PS1_clade
OTU855	0	1	1	1	0	1	1	1	0	0	0	d__Bacteria;k__norank;p__Proteobacteria;c__Alphaproteobacteria;o__Rickettsiales;f__S25-593;g__norank_f__S25-593;s__marine_metagenome_g__norank_f__S25-593
OTU856	0	0	0	0	1	1	1	0	0	0	0	d__Bacteria;k__norank;p__Proteobacteria;c__Betaproteobacteria;o__Burkholderiales;f__Comamonadaceae;g__unclassified_f__Comamonadaceae;s__unclassified_f__Comamonadaceae
OTU857	0	1	1	0	0	0	1	0	0	0	0	d__Bacteria;k__norank;p__Proteobacteria;c__Gammaproteobacteria;o__Cellvibrionales;f__Cellvibrionaceae;g__Umboniibacter;s__uncultured_bacterium_g__Umboniibacter
OTU858	0	0	1	1	0	0	1	0	0	0	0	d__Bacteria;k__norank;p__Planctomycetes;c__Phycisphaerae;o__Phycisphaerales;f__Phycisphaeraceae;g__norank_f__Phycisphaeraceae;s__uncultured_bacterium_g__norank_f__Phycisphaeraceae
OTU859	0	0	1	1	0	1	1	1	0	0	0	d__Bacteria;k__norank;p__Verrucomicrobia;c__Arctic97B-4_marine_group;o__norank_c__Arctic97B-4_marine_group;f__norank_c__Arctic97B-4_marine_group;g__norank_c__Arctic97B-4_marine_group;s__uncultured_bacterium_g__norank_c__Arctic97B-4_marine_group
OTU860	0	0	1	1	0	0	1	1	0	0	0	d__Bacteria;k__norank;p__Proteobacteria;c__Alphaproteobacteria;o__Rhodospirillales;f__Rhodospirillaceae;g__norank_f__Rhodospirillaceae;s__uncultured_nuHF2_cluster_bacterium_HF0770_42C12
OTU861	0	0	1	1	0	0	1	1	0	0	0	d__Bacteria;k__norank;p__Proteobacteria;c__Alphaproteobacteria;o__Rhodospirillales;f__Rhodospirillaceae;g__AEGEAN-169_marine_group;s__alpha_proteobacterium_SCGC_AB-629-F11
OTU862	0	1	0	0	1	1	1	0	0	0	1	d__Bacteria;k__norank;p__Proteobacteria;c__Gammaproteobacteria;o__unclassified_c__Gammaproteobacteria;f__unclassified_c__Gammaproteobacteria;g__unclassified_c__Gammaproteobacteria;s__unclassified_c__Gammaproteobacteria
OTU863	0	1	1	1	0	1	1	1	0	0	0	d__Bacteria;k__norank;p__Bacteroidetes;c__Cytophagia;o__Cytophagales;f__Flammeovirgaceae;g__Marinoscillum;s__unclassified_g__Marinoscillum
OTU864	0	1	1	1	0	1	1	1	0	0	0	d__Bacteria;k__norank;p__Marinimicrobia__SAR406_clade_;c__norank_p__Marinimicrobia__SAR406_clade_;o__norank_p__Marinimicrobia__SAR406_clade_;f__norank_p__Marinimicrobia__SAR406_clade_;g__norank_p__Marinimicrobia__SAR406_clade_;s__uncultured_bacterium_g__norank_p__Marinimicrobia__SAR406_clade_
OTU865	0	0	1	1	0	0	1	1	0	0	0	d__Bacteria;k__norank;p__Planctomycetes;c__OM190;o__norank_c__OM190;f__norank_c__OM190;g__norank_c__OM190;s__unclassified_g__norank_c__OM190
OTU866	0	0	1	0	0	0	1	0	0	0	0	d__Bacteria;k__norank;p__Nitrospinae;c__MD2896-B214;o__norank_c__MD2896-B214;f__norank_c__MD2896-B214;g__norank_c__MD2896-B214;s__uncultured_proteobacterium_g__norank_c__MD2896-B214
OTU867	0	0	1	1	0	0	1	1	0	0	0	d__Bacteria;k__norank;p__Proteobacteria;c__Alphaproteobacteria;o__SAR11_clade;f__unclassified_o__SAR11_clade;g__unclassified_o__SAR11_clade;s__unclassified_o__SAR11_clade
OTU868	0	0	1	0	0	0	1	0	0	0	0	d__Bacteria;k__norank;p__Planctomycetes;c__OM190;o__norank_c__OM190;f__norank_c__OM190;g__norank_c__OM190;s__unclassified_g__norank_c__OM190
OTU869	0	0	1	0	0	0	1	1	0	0	0	d__Bacteria;k__norank;p__Proteobacteria;c__Deltaproteobacteria;o__Myxococcales;f__P3OB-42;g__norank_f__P3OB-42;s__uncultured_bacterium_g__norank_f__P3OB-42
OTU870	0	0	0	0	0	1	1	1	0	0	0	d__Bacteria;k__norank;p__unclassified_k__norank;c__unclassified_k__norank;o__unclassified_k__norank;f__unclassified_k__norank;g__unclassified_k__norank;s__unclassified_k__norank
OTU871	0	0	1	1	0	0	1	1	0	0	0	d__Bacteria;k__norank;p__Proteobacteria;c__Deltaproteobacteria;o__unclassified_c__Deltaproteobacteria;f__unclassified_c__Deltaproteobacteria;g__unclassified_c__Deltaproteobacteria;s__unclassified_c__Deltaproteobacteria
OTU872	0	0	1	1	0	0	1	0	0	0	0	d__Bacteria;k__norank;p__Proteobacteria;c__Alphaproteobacteria;o__unclassified_c__Alphaproteobacteria;f__unclassified_c__Alphaproteobacteria;g__unclassified_c__Alphaproteobacteria;s__unclassified_c__Alphaproteobacteria
OTU873	0	0	0	0	0	1	1	0	0	0	0	d__Bacteria;k__norank;p__Acidobacteria;c__Acidobacteria;o__Blastocatellales;f__Blastocatellaceae__Subgroup_4_;g__11-24;s__uncultured_bacterium_g__11-24
OTU874	0	0	1	1	0	0	1	1	0	0	0	d__Bacteria;k__norank;p__Proteobacteria;c__Gammaproteobacteria;o__E01-9C-26_marine_group;f__norank_o__E01-9C-26_marine_group;g__norank_o__E01-9C-26_marine_group;s__uncultured_gamma_proteobacterium_HF0200_24F15
OTU875	0	0	1	1	0	0	1	1	0	0	0	d__Bacteria;k__norank;p__Proteobacteria;c__Alphaproteobacteria;o__Rhodospirillales;f__Rhodospirillaceae;g__Magnetospira;s__uncultured_bacterium_g__Magnetospira
OTU876	0	0	0	0	1	1	1	0	0	1	0	d__Bacteria;k__norank;p__Proteobacteria;c__Gammaproteobacteria;o__Legionellales;f__Legionellaceae;g__Legionella;s__uncultured_bacterium_g__Legionella
OTU877	0	1	1	0	0	1	1	0	0	0	0	d__Bacteria;k__norank;p__Bacteroidetes;c__Flavobacteriia;o__Flavobacteriales;f__Cryomorphaceae;g__Fluviicola;s__unclassified_g__Fluviicola
OTU878	0	0	1	1	0	0	1	1	0	0	0	d__Bacteria;k__norank;p__Proteobacteria;c__Gammaproteobacteria;o__Oceanospirillales;f__SAR86_clade;g__norank_f__SAR86_clade;s__unclassified_g__norank_f__SAR86_clade
OTU879	0	0	1	1	0	0	1	0	0	0	0	d__Bacteria;k__norank;p__Planctomycetes;c__OM190;o__norank_c__OM190;f__norank_c__OM190;g__norank_c__OM190;s__uncultured_Planctomycetaceae_bacterium_g__norank_c__OM190
OTU880	0	0	1	1	0	0	1	1	0	0	0	d__Bacteria;k__norank;p__Proteobacteria;c__Gammaproteobacteria;o__E01-9C-26_marine_group;f__norank_o__E01-9C-26_marine_group;g__norank_o__E01-9C-26_marine_group;s__unclassified_g__norank_o__E01-9C-26_marine_group
OTU881	0	1	1	0	0	1	1	1	0	1	0	d__Bacteria;k__norank;p__Proteobacteria;c__SPOTSOCT00m83;o__norank_c__SPOTSOCT00m83;f__norank_c__SPOTSOCT00m83;g__norank_c__SPOTSOCT00m83;s__uncultured_bacterium_g__norank_c__SPOTSOCT00m83
OTU882	0	0	1	0	0	0	1	0	0	0	0	d__Bacteria;k__norank;p__Acidobacteria;c__Acidobacteria;o__norank_c__Acidobacteria;f__norank_c__Acidobacteria;g__norank_c__Acidobacteria;s__uncultured_deep-sea_bacterium_g__norank_c__Acidobacteria
OTU883	0	1	1	1	0	1	1	1	0	0	0	d__Bacteria;k__norank;p__Proteobacteria;c__AEGEAN-245;o__norank_c__AEGEAN-245;f__norank_c__AEGEAN-245;g__norank_c__AEGEAN-245;s__unclassified_g__norank_c__AEGEAN-245
OTU884	0	0	1	0	0	0	1	0	0	0	0	d__Bacteria;k__norank;p__Planctomycetes;c__OM190;o__norank_c__OM190;f__norank_c__OM190;g__norank_c__OM190;s__unclassified_g__norank_c__OM190
OTU885	0	0	1	0	0	0	1	0	0	0	0	d__Bacteria;k__norank;p__Verrucomicrobia;c__Arctic97B-4_marine_group;o__norank_c__Arctic97B-4_marine_group;f__norank_c__Arctic97B-4_marine_group;g__norank_c__Arctic97B-4_marine_group;s__unclassified_g__norank_c__Arctic97B-4_marine_group
OTU886	0	0	0	0	0	1	1	0	0	0	1	d__Bacteria;k__norank;p__Planctomycetes;c__Phycisphaerae;o__Phycisphaerales;f__Phycisphaeraceae;g__SM1A02;s__unclassified_g__SM1A02
OTU887	0	0	0	0	1	1	1	0	0	0	0	d__Bacteria;k__norank;p__Gemmatimonadetes;c__Gemmatimonadetes;o__Gemmatimonadales;f__Gemmatimonadaceae;g__Gemmatimonas;s__unclassified_g__Gemmatimonas
OTU888	0	0	1	0	0	0	1	1	0	0	0	d__Bacteria;k__norank;p__Cyanobacteria;c__Cyanobacteria;o__norank_c__Cyanobacteria;f__norank_c__Cyanobacteria;g__norank_c__Cyanobacteria;s__unclassified_g__norank_c__Cyanobacteria
OTU889	0	0	0	0	0	1	1	0	0	0	0	d__Bacteria;k__norank;p__Proteobacteria;c__Deltaproteobacteria;o__Bdellovibrionales;f__Bacteriovoracaceae;g__Peredibacter;s__unclassified_g__Peredibacter
OTU890	0	0	1	0	0	0	1	1	0	0	0	d__Bacteria;k__norank;p__Chloroflexi;c__SAR202_clade;o__norank_c__SAR202_clade;f__norank_c__SAR202_clade;g__norank_c__SAR202_clade;s__unclassified_g__norank_c__SAR202_clade
OTU891	0	0	1	1	0	0	1	1	0	0	0	d__Bacteria;k__norank;p__Planctomycetes;c__OM190;o__norank_c__OM190;f__norank_c__OM190;g__norank_c__OM190;s__uncultured_Planctomyces_sp._g__norank
OTU892	0	0	1	1	0	0	1	1	0	0	0	d__Bacteria;k__norank;p__Proteobacteria;c__Alphaproteobacteria;o__Rhodospirillales;f__Rhodospirillaceae;g__Magnetospira;s__uncultured_nuHF1_cluster_bacterium_HF0770_35I22
OTU893	0	0	0	0	0	0	1	0	0	0	0	d__Bacteria;k__norank;p__Proteobacteria;c__Alphaproteobacteria;o__Rickettsiales;f__[Caedibacter]_caryophilus_group;g__norank_f__[Caedibacter]_caryophilus_group;s__uncultured_bacterium_g__norank_f__[Caedibacter]_caryophilus_group
OTU894	0	0	1	1	0	0	1	1	0	0	0	d__Bacteria;k__norank;p__Chloroflexi;c__SAR202_clade;o__norank_c__SAR202_clade;f__norank_c__SAR202_clade;g__norank_c__SAR202_clade;s__unclassified_g__norank_c__SAR202_clade
OTU895	0	0	0	0	0	0	1	0	0	0	0	d__Bacteria;k__norank;p__Proteobacteria;c__Deltaproteobacteria;o__Bdellovibrionales;f__Bdellovibrionaceae;g__OM27_clade;s__unclassified_g__OM27_clade
OTU896	0	0	1	0	0	1	1	1	0	0	0	d__Bacteria;k__norank;p__Proteobacteria;c__Alphaproteobacteria;o__Rhodospirillales;f__Rhodospirillaceae;g__AEGEAN-169_marine_group;s__uncultured_marine_bacterium_g__AEGEAN-169_marine_group
OTU897	0	1	1	1	0	1	1	1	0	0	0	d__Bacteria;k__norank;p__Proteobacteria;c__Deltaproteobacteria;o__Myxococcales;f__P3OB-42;g__norank_f__P3OB-42;s__uncultured_bacterium_g__norank_f__P3OB-42
OTU898	0	0	1	0	0	0	1	0	0	0	0	d__Bacteria;k__norank;p__Chloroflexi;c__unclassified_p__Chloroflexi;o__unclassified_p__Chloroflexi;f__unclassified_p__Chloroflexi;g__unclassified_p__Chloroflexi;s__unclassified_p__Chloroflexi
OTU899	0	0	1	1	0	0	1	1	0	0	0	d__Bacteria;k__norank;p__unclassified_k__norank;c__unclassified_k__norank;o__unclassified_k__norank;f__unclassified_k__norank;g__unclassified_k__norank;s__unclassified_k__norank
OTU900	0	0	0	0	0	0	1	1	0	0	0	d__Bacteria;k__norank;p__Planctomycetes;c__Phycisphaerae;o__Phycisphaerales;f__Phycisphaeraceae;g__norank_f__Phycisphaeraceae;s__unclassified_g__norank_f__Phycisphaeraceae
OTU901	0	0	1	1	0	0	1	1	0	0	0	d__Bacteria;k__norank;p__unclassified_k__norank;c__unclassified_k__norank;o__unclassified_k__norank;f__unclassified_k__norank;g__unclassified_k__norank;s__unclassified_k__norank
OTU902	1	0	0	0	1	0	1	1	0	0	0	d__Bacteria;k__norank;p__Actinobacteria;c__Actinobacteria;o__Corynebacteriales;f__Mycobacteriaceae;g__Mycobacterium;s__unclassified_g__Mycobacterium
OTU903	0	0	1	1	0	0	1	1	0	0	0	d__Bacteria;k__norank;p__Proteobacteria;c__Gammaproteobacteria;o__Cellvibrionales;f__Spongiibacteraceae;g__BD1-7_clade;s__unclassified_g__BD1-7_clade
OTU904	0	1	1	0	0	1	1	0	0	0	0	d__Bacteria;k__norank;p__Proteobacteria;c__Alphaproteobacteria;o__Rhodospirillales;f__Rhodospirillaceae;g__norank_f__Rhodospirillaceae;s__hydrothermal_vent_metagenome_g__norank_f__Rhodospirillaceae
OTU905	0	1	1	1	0	1	1	1	0	0	1	d__Bacteria;k__norank;p__Proteobacteria;c__Deltaproteobacteria;o__SAR324_clade_Marine_group_B_;f__norank_o__SAR324_clade_Marine_group_B_;g__norank_o__SAR324_clade_Marine_group_B_;s__unclassified_g__norank_o__SAR324_clade_Marine_group_B_
OTU906	1	0	1	0	1	1	1	1	1	1	1	d__Bacteria;k__norank;p__Bacteroidetes;c__Flavobacteriia;o__Flavobacteriales;f__Flavobacteriaceae;g__Muricauda;s__unclassified_g__Muricauda
OTU907	1	0	0	1	1	1	1	1	1	1	1	d__Bacteria;k__norank;p__Proteobacteria;c__Alphaproteobacteria;o__Rhodobacterales;f__Rhodobacteraceae;g__unclassified_f__Rhodobacteraceae;s__unclassified_f__Rhodobacteraceae
OTU908	1	1	1	1	1	1	1	1	1	1	0	d__Bacteria;k__norank;p__Proteobacteria;c__Alphaproteobacteria;o__Rhizobiales;f__Bradyrhizobiaceae;g__Bradyrhizobium;s__unclassified_g__Bradyrhizobium
OTU909	0	0	1	1	0	0	1	1	0	0	0	d__Bacteria;k__norank;p__Proteobacteria;c__Alphaproteobacteria;o__Rhodospirillales;f__Rhodospirillaceae;g__AEGEAN-169_marine_group;s__uncultured_Rickettsiales_bacterium_g__AEGEAN-169_marine_group
OTU910	0	0	1	0	0	0	1	1	0	0	0	d__Bacteria;k__norank;p__Proteobacteria;c__Alphaproteobacteria;o__Rickettsiales;f__S25-593;g__norank_f__S25-593;s__uncultured_Rickettsiales_bacterium_g__norank_f__S25-593
OTU911	0	0	1	0	0	0	1	1	1	0	1	d__Bacteria;k__norank;p__Planctomycetes;c__OM190;o__norank_c__OM190;f__norank_c__OM190;g__norank_c__OM190;s__uncultured_bacterium_g__norank_c__OM190
OTU912	0	0	1	0	0	0	1	0	0	0	0	d__Bacteria;k__norank;p__Proteobacteria;c__Deltaproteobacteria;o__SAR324_clade_Marine_group_B_;f__norank_o__SAR324_clade_Marine_group_B_;g__norank_o__SAR324_clade_Marine_group_B_;s__uncultured_bacterium_HF0200_14D13
OTU913	0	0	1	0	0	0	1	1	0	0	0	d__Bacteria;k__norank;p__Proteobacteria;c__Gammaproteobacteria;o__unclassified_c__Gammaproteobacteria;f__unclassified_c__Gammaproteobacteria;g__unclassified_c__Gammaproteobacteria;s__unclassified_c__Gammaproteobacteria
OTU914	0	0	1	1	0	1	1	1	0	0	0	d__Bacteria;k__norank;p__Proteobacteria;c__unclassified_p__Proteobacteria;o__unclassified_p__Proteobacteria;f__unclassified_p__Proteobacteria;g__unclassified_p__Proteobacteria;s__unclassified_p__Proteobacteria
OTU915	0	1	0	1	1	1	1	1	1	0	1	d__Bacteria;k__norank;p__Proteobacteria;c__Alphaproteobacteria;o__Sphingomonadales;f__Sphingomonadaceae;g__Sphingomonas;s__Sphingomonas_wittichii
OTU916	0	0	1	1	0	0	1	1	0	0	0	d__Bacteria;k__norank;p__unclassified_k__norank;c__unclassified_k__norank;o__unclassified_k__norank;f__unclassified_k__norank;g__unclassified_k__norank;s__unclassified_k__norank
OTU917	0	0	1	0	0	0	1	0	0	0	0	d__Bacteria;k__norank;p__Acidobacteria;c__Acidobacteria;o__norank_c__Acidobacteria;f__norank_c__Acidobacteria;g__norank_c__Acidobacteria;s__uncultured_bacterium_KM3-173-A5
OTU918	0	0	1	0	0	0	1	0	0	0	0	d__Bacteria;k__norank;p__Gemmatimonadetes;c__Gemmatimonadetes;o__norank_c__Gemmatimonadetes;f__norank_c__Gemmatimonadetes;g__norank_c__Gemmatimonadetes;s__uncultured_BD2-11_clade_bacterium
OTU919	0	0	0	0	0	0	1	0	0	0	0	d__Bacteria;k__norank;p__Proteobacteria;c__Deltaproteobacteria;o__Bradymonadales;f__norank_o__Bradymonadales;g__norank_o__Bradymonadales;s__uncultured_Geobacteraceae_bacterium_g__norank
OTU920	0	0	1	0	0	0	1	0	0	0	0	d__Bacteria;k__norank;p__Proteobacteria;c__Deltaproteobacteria;o__Desulfurellales;f__Desulfurellaceae;g__G55;s__uncultured_delta_proteobacterium_g__G55
OTU921	0	0	1	1	0	0	1	1	0	0	0	d__Bacteria;k__norank;p__Planctomycetes;c__OM190;o__norank_c__OM190;f__norank_c__OM190;g__norank_c__OM190;s__unclassified_g__norank_c__OM190
OTU922	0	0	0	0	1	1	1	0	1	0	1	d__Bacteria;k__norank;p__Proteobacteria;c__Alphaproteobacteria;o__Rhizobiales;f__Hyphomicrobiaceae;g__Pedomicrobium;s__unclassified_g__Pedomicrobium
OTU923	0	0	1	0	0	0	1	0	0	0	0	d__Bacteria;k__norank;p__Chloroflexi;c__SAR202_clade;o__norank_c__SAR202_clade;f__norank_c__SAR202_clade;g__norank_c__SAR202_clade;s__hydrothermal_vent_metagenome_g__norank_c__SAR202_clade
OTU924	0	0	1	0	0	0	1	1	0	0	0	d__Bacteria;k__norank;p__Proteobacteria;c__Deltaproteobacteria;o__Myxococcales;f__P3OB-42;g__norank_f__P3OB-42;s__uncultured_bacterium_g__norank_f__P3OB-42
OTU925	0	0	1	1	0	1	1	1	1	0	0	d__Bacteria;k__norank;p__Proteobacteria;c__Alphaproteobacteria;o__Rhodospirillales;f__Rhodospirillaceae;g__Magnetospira;s__unclassified_g__Magnetospira
OTU926	0	0	1	1	0	1	1	1	0	0	0	d__Bacteria;k__norank;p__Proteobacteria;c__Deltaproteobacteria;o__SAR324_clade_Marine_group_B_;f__norank_o__SAR324_clade_Marine_group_B_;g__norank_o__SAR324_clade_Marine_group_B_;s__uncultured_SAR324_cluster_bacterium
OTU927	0	0	1	1	0	0	1	1	0	0	0	d__Bacteria;k__norank;p__Chloroflexi;c__SAR202_clade;o__norank_c__SAR202_clade;f__norank_c__SAR202_clade;g__norank_c__SAR202_clade;s__marine_metagenome_g__norank_c__SAR202_clade
OTU928	0	0	1	1	0	1	1	1	0	0	0	d__Bacteria;k__norank;p__Marinimicrobia__SAR406_clade_;c__norank_p__Marinimicrobia__SAR406_clade_;o__norank_p__Marinimicrobia__SAR406_clade_;f__norank_p__Marinimicrobia__SAR406_clade_;g__norank_p__Marinimicrobia__SAR406_clade_;s__uncultured_FibrobacteresAcidobacteria_group_bacterium
OTU929	0	1	1	1	0	1	1	0	0	0	0	d__Bacteria;k__norank;p__Bacteroidetes;c__Flavobacteriia;o__Flavobacteriales;f__unclassified_o__Flavobacteriales;g__unclassified_o__Flavobacteriales;s__unclassified_o__Flavobacteriales
OTU930	1	0	0	0	1	1	1	0	0	0	0	d__Bacteria;k__norank;p__Proteobacteria;c__Alphaproteobacteria;o__Sphingomonadales;f__Sphingomonadaceae;g__Sphingobium;s__unclassified_g__Sphingobium
OTU931	0	0	1	1	0	0	1	1	0	0	0	d__Bacteria;k__norank;p__Chloroflexi;c__S085;o__norank_c__S085;f__norank_c__S085;g__norank_c__S085;s__uncultured_Chloroflexus_sp._g__norank_c__S085
OTU932	0	0	1	1	0	1	1	1	0	0	0	d__Bacteria;k__norank;p__Proteobacteria;c__Alphaproteobacteria;o__Rhodospirillales;f__Rhodospirillaceae;g__AEGEAN-169_marine_group;s__uncultured_bacterium_g__AEGEAN-169_marine_group
OTU933	0	0	1	0	0	0	1	1	0	0	0	d__Bacteria;k__norank;p__Chloroflexi;c__JG30-KF-CM66;o__norank_c__JG30-KF-CM66;f__norank_c__JG30-KF-CM66;g__norank_c__JG30-KF-CM66;s__uncultured_Chloroflexi_bacterium_g__norank_c__JG30-KF-CM66
OTU934	0	0	1	1	0	0	1	0	0	0	0	d__Bacteria;k__norank;p__Chloroflexi;c__SAR202_clade;o__norank_c__SAR202_clade;f__norank_c__SAR202_clade;g__norank_c__SAR202_clade;s__uncultured_bacterium_g__norank_c__SAR202_clade
OTU935	1	1	1	1	1	1	1	1	0	0	0	d__Bacteria;k__norank;p__Proteobacteria;c__Alphaproteobacteria;o__Rhodospirillales;f__Rhodospirillales_Incertae_Sedis;g__Reyranella;s__unclassified_g__Reyranella
OTU936	0	0	1	0	0	0	1	0	0	0	0	d__Bacteria;k__norank;p__Proteobacteria;c__Deltaproteobacteria;o__unclassified_c__Deltaproteobacteria;f__unclassified_c__Deltaproteobacteria;g__unclassified_c__Deltaproteobacteria;s__unclassified_c__Deltaproteobacteria
OTU937	0	0	1	0	0	0	1	0	0	0	0	d__Bacteria;k__norank;p__Chloroflexi;c__unclassified_p__Chloroflexi;o__unclassified_p__Chloroflexi;f__unclassified_p__Chloroflexi;g__unclassified_p__Chloroflexi;s__unclassified_p__Chloroflexi
OTU938	0	0	1	0	0	0	1	0	0	0	0	d__Bacteria;k__norank;p__Chloroflexi;c__SAR202_clade;o__norank_c__SAR202_clade;f__norank_c__SAR202_clade;g__norank_c__SAR202_clade;s__unclassified_g__norank_c__SAR202_clade
OTU939	0	0	1	1	0	0	1	1	0	0	0	d__Bacteria;k__norank;p__Verrucomicrobia;c__Arctic97B-4_marine_group;o__norank_c__Arctic97B-4_marine_group;f__norank_c__Arctic97B-4_marine_group;g__norank_c__Arctic97B-4_marine_group;s__uncultured_marine_bacterium_g__norank_c__Arctic97B-4_marine_group
OTU940	0	1	1	1	1	1	1	1	0	0	0	d__Bacteria;k__norank;p__Proteobacteria;c__Alphaproteobacteria;o__Rhodospirillales;f__Rhodospirillaceae;g__AEGEAN-169_marine_group;s__uncultured_alpha_proteobacterium_g__AEGEAN-169_marine_group
OTU941	0	0	1	0	0	0	1	0	0	0	0	d__Bacteria;k__norank;p__Proteobacteria;c__Deltaproteobacteria;o__Myxococcales;f__P3OB-42;g__norank_f__P3OB-42;s__unclassified_g__norank_f__P3OB-42
OTU942	0	0	1	1	0	0	1	1	0	0	0	d__Bacteria;k__norank;p__Proteobacteria;c__Deltaproteobacteria;o__Desulfurellales;f__Desulfurellaceae;g__H16;s__unclassified_g__H16
OTU943	0	0	1	0	0	0	1	0	0	0	0	d__Bacteria;k__norank;p__Acidobacteria;c__Acidobacteria;o__Solibacterales;f__Solibacteraceae__Subgroup_3_;g__PAUC26f;s__uncultured_bacterium_g__PAUC26f
OTU944	0	0	1	1	0	0	1	0	0	0	0	d__Bacteria;k__norank;p__Spirochaetae;c__Spirochaetes;o__Spirochaetales;f__Spirochaetaceae;g__Spirochaeta_2;s__marine_metagenome_g__Spirochaeta_2
OTU945	0	0	1	0	0	0	1	1	0	0	0	d__Bacteria;k__norank;p__Bacteroidetes;c__Flavobacteriia;o__Flavobacteriales;f__NS9_marine_group;g__norank_f__NS9_marine_group;s__unclassified_g__norank_f__NS9_marine_group
OTU946	1	0	0	0	1	1	1	1	1	1	1	d__Bacteria;k__norank;p__Bacteroidetes;c__Flavobacteriia;o__Flavobacteriales;f__Cryomorphaceae;g__Crocinitomix;s__uncultured_bacterium_g__Crocinitomix
OTU947	0	0	1	1	0	0	1	1	0	0	0	d__Bacteria;k__norank;p__Bacteroidetes;c__Sphingobacteriia;o__Sphingobacteriales;f__unclassified_o__Sphingobacteriales;g__unclassified_o__Sphingobacteriales;s__unclassified_o__Sphingobacteriales
OTU948	0	0	1	0	0	0	1	0	1	0	0	d__Bacteria;k__norank;p__PAUC34f;c__norank_p__PAUC34f;o__norank_p__PAUC34f;f__norank_p__PAUC34f;g__norank_p__PAUC34f;s__marine_metagenome_g__norank_p__PAUC34f
OTU949	0	0	1	1	0	0	1	1	0	0	0	d__Bacteria;k__norank;p__Planctomycetes;c__Phycisphaerae;o__Phycisphaerales;f__Phycisphaeraceae;g__FS140-16B-02_marine_group;s__unclassified_g__FS140-16B-02_marine_group
OTU950	0	0	0	0	1	1	1	0	0	0	0	d__Bacteria;k__norank;p__Proteobacteria;c__Alphaproteobacteria;o__Rhizobiales;f__Hyphomicrobiaceae;g__Hyphomicrobium;s__unclassified_g__Hyphomicrobium
OTU951	0	0	1	1	0	0	1	1	0	0	0	d__Bacteria;k__norank;p__Chloroflexi;c__SAR202_clade;o__norank_c__SAR202_clade;f__norank_c__SAR202_clade;g__norank_c__SAR202_clade;s__unclassified_g__norank_c__SAR202_clade
OTU952	0	0	1	1	0	0	1	1	0	0	0	d__Bacteria;k__norank;p__Proteobacteria;c__Deltaproteobacteria;o__Bradymonadales;f__norank_o__Bradymonadales;g__norank_o__Bradymonadales;s__uncultured_deep-sea_bacterium_g__norank_o__Bradymonadales
OTU953	0	1	1	1	1	1	1	1	0	1	0	d__Bacteria;k__norank;p__Marinimicrobia__SAR406_clade_;c__norank_p__Marinimicrobia__SAR406_clade_;o__norank_p__Marinimicrobia__SAR406_clade_;f__norank_p__Marinimicrobia__SAR406_clade_;g__norank_p__Marinimicrobia__SAR406_clade_;s__uncultured_marine_microorganism_g__norank_p__Marinimicrobia__SAR406_clade_
OTU954	0	0	1	1	0	0	1	1	0	0	0	d__Bacteria;k__norank;p__Proteobacteria;c__Deltaproteobacteria;o__Bdellovibrionales;f__Bdellovibrionaceae;g__OM27_clade;s__uncultured_delta_proteobacterium_g__OM27_clade
OTU955	1	0	0	0	0	1	1	0	0	1	1	d__Bacteria;k__norank;p__Cyanobacteria;c__Cyanobacteria;o__norank_c__Cyanobacteria;f__norank_c__Cyanobacteria;g__norank_c__Cyanobacteria;s__uncultured_diatom
OTU956	0	0	1	1	0	0	1	1	0	0	0	d__Bacteria;k__norank;p__Proteobacteria;c__Alphaproteobacteria;o__Rhodospirillales;f__unclassified_o__Rhodospirillales;g__unclassified_o__Rhodospirillales;s__unclassified_o__Rhodospirillales
OTU957	0	0	1	0	0	0	1	1	0	0	0	d__Bacteria;k__norank;p__Acidobacteria;c__Acidobacteria;o__norank_c__Acidobacteria;f__norank_c__Acidobacteria;g__norank_c__Acidobacteria;s__unclassified_g__norank_c__Acidobacteria
OTU958	0	0	1	1	0	1	1	1	0	0	0	d__Bacteria;k__norank;p__Marinimicrobia__SAR406_clade_;c__norank_p__Marinimicrobia__SAR406_clade_;o__norank_p__Marinimicrobia__SAR406_clade_;f__norank_p__Marinimicrobia__SAR406_clade_;g__norank_p__Marinimicrobia__SAR406_clade_;s__uncultured_bacterium_405006-B04
OTU959	0	0	0	1	0	0	1	1	0	0	0	d__Bacteria;k__norank;p__Cyanobacteria;c__Cyanobacteria;o__norank_c__Cyanobacteria;f__norank_c__Cyanobacteria;g__norank_c__Cyanobacteria;s__uncultured_Candidatus_Marinimicrobia_bacterium_g__norank
OTU960	0	0	1	1	0	0	1	1	0	0	0	d__Bacteria;k__norank;p__Spirochaetae;c__Spirochaetes;o__Spirochaetales;f__Spirochaetaceae;g__Spirochaeta_2;s__marine_metagenome_g__Spirochaeta_2
OTU961	0	0	1	1	0	0	1	1	0	0	0	d__Bacteria;k__norank;p__Marinimicrobia__SAR406_clade_;c__norank_p__Marinimicrobia__SAR406_clade_;o__norank_p__Marinimicrobia__SAR406_clade_;f__norank_p__Marinimicrobia__SAR406_clade_;g__norank_p__Marinimicrobia__SAR406_clade_;s__uncultured_bacterium_g__norank_p__Marinimicrobia__SAR406_clade_
OTU962	0	0	1	1	0	0	1	1	0	0	0	d__Bacteria;k__norank;p__Marinimicrobia__SAR406_clade_;c__norank_p__Marinimicrobia__SAR406_clade_;o__norank_p__Marinimicrobia__SAR406_clade_;f__norank_p__Marinimicrobia__SAR406_clade_;g__norank_p__Marinimicrobia__SAR406_clade_;s__Marinimicrobia_bacterium_SCGC_AAA003-L08
OTU963	0	0	0	0	0	0	1	1	0	0	0	d__Bacteria;k__norank;p__Planctomycetes;c__Phycisphaerae;o__Phycisphaerales;f__Phycisphaeraceae;g__norank_f__Phycisphaeraceae;s__uncultured_bacterium_g__norank_f__Phycisphaeraceae
OTU964	0	0	1	0	0	0	1	0	0	0	0	d__Bacteria;k__norank;p__Chloroflexi;c__SAR202_clade;o__norank_c__SAR202_clade;f__norank_c__SAR202_clade;g__norank_c__SAR202_clade;s__unclassified_g__norank_c__SAR202_clade
OTU965	0	0	0	1	0	0	1	1	0	0	0	d__Bacteria;k__norank;p__Proteobacteria;c__Deltaproteobacteria;o__unclassified_c__Deltaproteobacteria;f__unclassified_c__Deltaproteobacteria;g__unclassified_c__Deltaproteobacteria;s__unclassified_c__Deltaproteobacteria
OTU966	0	0	1	1	0	0	1	1	0	0	0	d__Bacteria;k__norank;p__Proteobacteria;c__Deltaproteobacteria;o__Bdellovibrionales;f__Bdellovibrionaceae;g__OM27_clade;s__unclassified_g__OM27_clade
OTU967	0	1	1	1	0	0	1	1	1	1	1	d__Bacteria;k__norank;p__Actinobacteria;c__Actinobacteria;o__Corynebacteriales;f__Nocardiaceae;g__Rhodococcus;s__Rhodococcus_fascians
OTU968	0	0	0	1	0	0	1	1	0	0	0	d__Bacteria;k__norank;p__Proteobacteria;c__Deltaproteobacteria;o__Bradymonadales;f__norank_o__Bradymonadales;g__norank_o__Bradymonadales;s__uncultured_deep-sea_bacterium_g__norank_o__Bradymonadales
OTU969	0	1	1	1	0	1	1	1	0	0	0	d__Bacteria;k__norank;p__Cyanobacteria;c__Cyanobacteria;o__norank_c__Cyanobacteria;f__norank_c__Cyanobacteria;g__norank_c__Cyanobacteria;s__uncultured_Candidatus_Marinimicrobia_bacterium_g__norank
OTU970	0	0	1	1	0	0	1	1	0	0	0	d__Bacteria;k__norank;p__Acidobacteria;c__Acidobacteria;o__norank_c__Acidobacteria;f__norank_c__Acidobacteria;g__norank_c__Acidobacteria;s__uncultured_bacterium_KM3-18-F8
OTU971	0	0	1	1	0	0	1	0	0	0	0	d__Bacteria;k__norank;p__Nitrospinae;c__Nitrospinia;o__Nitrospinales;f__Nitrospinaceae;g__Nitrospina;s__uncultured_bacterium_g__Nitrospina
OTU972	0	0	1	0	0	1	1	1	0	0	0	d__Bacteria;k__norank;p__Proteobacteria;c__Deltaproteobacteria;o__Bradymonadales;f__norank_o__Bradymonadales;g__norank_o__Bradymonadales;s__unclassified_g__norank_o__Bradymonadales
OTU973	0	0	1	1	0	1	1	1	0	0	0	d__Bacteria;k__norank;p__Marinimicrobia__SAR406_clade_;c__norank_p__Marinimicrobia__SAR406_clade_;o__norank_p__Marinimicrobia__SAR406_clade_;f__norank_p__Marinimicrobia__SAR406_clade_;g__norank_p__Marinimicrobia__SAR406_clade_;s__Marinimicrobia_bacterium_SCGC_AAA003-L08
OTU974	0	0	1	0	0	0	1	1	0	0	0	d__Bacteria;k__norank;p__Planctomycetes;c__BD7-11;o__norank_c__BD7-11;f__norank_c__BD7-11;g__norank_c__BD7-11;s__uncultured_Planctomycetales_bacterium_g__norank_c__BD7-11
OTU975	0	0	0	1	0	1	1	1	0	0	0	d__Bacteria;k__norank;p__Proteobacteria;c__Alphaproteobacteria;o__SAR11_clade;f__Deep_1;g__norank_f__Deep_1;s__unclassified_g__norank_f__Deep_1
OTU976	0	0	1	1	0	0	1	1	0	0	0	d__Bacteria;k__norank;p__Nitrospinae;c__Nitrospinia;o__Nitrospinales;f__Nitrospinaceae;g__Nitrospina;s__unclassified_g__Nitrospina
OTU977	0	0	0	0	0	1	1	0	1	0	0	d__Bacteria;k__norank;p__Actinobacteria;c__Actinobacteria;o__Acidimicrobiales;f__Acidimicrobiaceae;g__Ilumatobacter;s__unclassified_g__Ilumatobacter
OTU978	0	0	1	1	0	0	1	1	0	0	0	d__Bacteria;k__norank;p__Chloroflexi;c__SAR202_clade;o__norank_c__SAR202_clade;f__norank_c__SAR202_clade;g__norank_c__SAR202_clade;s__uncultured_bacterium_g__norank_c__SAR202_clade
OTU979	0	0	0	0	0	0	1	1	0	0	0	d__Bacteria;k__norank;p__Cyanobacteria;c__Cyanobacteria;o__norank_c__Cyanobacteria;f__norank_c__Cyanobacteria;g__norank_c__Cyanobacteria;s__uncultured_Candidatus_Marinimicrobia_bacterium_g__norank
OTU980	0	0	1	0	0	0	1	1	0	0	0	d__Bacteria;k__norank;p__Proteobacteria;c__Deltaproteobacteria;o__Bdellovibrionales;f__Bdellovibrionaceae;g__OM27_clade;s__unclassified_g__OM27_clade
OTU981	0	0	1	0	0	0	1	0	0	0	0	d__Bacteria;k__norank;p__Planctomycetes;c__Phycisphaerae;o__Phycisphaerales;f__Phycisphaeraceae;g__Urania-1B-19_marine_sediment_group;s__unclassified_g__Urania-1B-19_marine_sediment_group
OTU982	1	1	1	1	1	1	1	1	0	1	1	d__Bacteria;k__norank;p__Proteobacteria;c__Alphaproteobacteria;o__SAR11_clade;f__Deep_1;g__norank_f__Deep_1;s__uncultured_marine_microorganism_g__norank_f__Deep_1
OTU983	0	0	0	0	0	1	1	1	0	0	0	d__Bacteria;k__norank;p__Proteobacteria;c__Alphaproteobacteria;o__Rickettsiales;f__SM2D12;g__norank_f__SM2D12;s__uncultured_bacterium_g__norank_f__SM2D12
OTU984	0	0	1	0	0	0	1	1	0	0	0	d__Bacteria;k__norank;p__Marinimicrobia__SAR406_clade_;c__norank_p__Marinimicrobia__SAR406_clade_;o__norank_p__Marinimicrobia__SAR406_clade_;f__norank_p__Marinimicrobia__SAR406_clade_;g__norank_p__Marinimicrobia__SAR406_clade_;s__uncultured_marine_microorganism_g__norank_p__Marinimicrobia__SAR406_clade_
OTU985	0	0	1	1	0	0	1	1	0	0	0	d__Bacteria;k__norank;p__Marinimicrobia__SAR406_clade_;c__norank_p__Marinimicrobia__SAR406_clade_;o__norank_p__Marinimicrobia__SAR406_clade_;f__norank_p__Marinimicrobia__SAR406_clade_;g__norank_p__Marinimicrobia__SAR406_clade_;s__unclassified_g__norank_p__Marinimicrobia__SAR406_clade_
OTU986	0	0	1	0	0	0	1	1	0	0	0	d__Bacteria;k__norank;p__Chloroflexi;c__SAR202_clade;o__norank_c__SAR202_clade;f__norank_c__SAR202_clade;g__norank_c__SAR202_clade;s__uncultured_Chloroflexi_bacterium_g__norank_c__SAR202_clade
OTU987	0	0	0	1	0	0	1	1	0	0	0	d__Bacteria;k__norank;p__Proteobacteria;c__Alphaproteobacteria;o__Rhodospirillales;f__Rhodospirillaceae;g__unclassified_f__Rhodospirillaceae;s__unclassified_f__Rhodospirillaceae
OTU988	0	0	1	1	0	0	1	1	0	0	0	d__Bacteria;k__norank;p__Acidobacteria;c__Acidobacteria;o__norank_c__Acidobacteria;f__norank_c__Acidobacteria;g__norank_c__Acidobacteria;s__uncultured_deep-sea_bacterium_g__norank_c__Acidobacteria
OTU989	0	0	1	1	0	1	1	1	0	0	0	d__Bacteria;k__norank;p__Proteobacteria;c__Deltaproteobacteria;o__Oligoflexales;f__Oligoflexaceae;g__norank_f__Oligoflexaceae;s__unclassified_g__norank_f__Oligoflexaceae
OTU990	0	1	1	1	0	1	1	1	0	0	0	d__Bacteria;k__norank;p__Proteobacteria;c__Deltaproteobacteria;o__unclassified_c__Deltaproteobacteria;f__unclassified_c__Deltaproteobacteria;g__unclassified_c__Deltaproteobacteria;s__unclassified_c__Deltaproteobacteria
OTU991	0	0	1	1	0	0	1	1	0	0	0	d__Bacteria;k__norank;p__Chloroflexi;c__SAR202_clade;o__norank_c__SAR202_clade;f__norank_c__SAR202_clade;g__norank_c__SAR202_clade;s__unclassified_g__norank_c__SAR202_clade
OTU992	0	0	1	1	0	0	1	0	0	0	0	d__Bacteria;k__norank;p__Proteobacteria;c__Gammaproteobacteria;o__Oceanospirillales;f__Oceanospirillaceae;g__Pseudohongiella;s__uncultured_proteobacterium_g__Pseudohongiella
OTU993	0	0	1	0	0	0	1	0	0	0	0	d__Bacteria;k__norank;p__Planctomycetes;c__OM190;o__norank_c__OM190;f__norank_c__OM190;g__norank_c__OM190;s__uncultured_bacterium_g__norank_c__OM190
OTU994	1	1	0	0	0	0	1	0	0	0	0	d__Bacteria;k__norank;p__Planctomycetes;c__Phycisphaerae;o__Phycisphaerales;f__Phycisphaeraceae;g__SM1A02;s__marine_metagenome_g__SM1A02
OTU995	0	0	1	1	0	0	1	0	0	0	0	d__Bacteria;k__norank;p__Nitrospinae;c__Nitrospinia;o__Nitrospinales;f__Nitrospinaceae;g__Nitrospina;s__uncultured_bacterium_g__Nitrospina
OTU996	0	0	1	0	0	0	1	1	0	0	0	d__Bacteria;k__norank;p__Proteobacteria;c__Deltaproteobacteria;o__Myxococcales;f__P3OB-42;g__norank_f__P3OB-42;s__unclassified_g__norank_f__P3OB-42
OTU997	0	0	1	0	0	0	1	0	0	0	0	d__Bacteria;k__norank;p__Proteobacteria;c__Gammaproteobacteria;o__E01-9C-26_marine_group;f__norank_o__E01-9C-26_marine_group;g__norank_o__E01-9C-26_marine_group;s__unclassified_g__norank_o__E01-9C-26_marine_group
OTU998	0	1	1	0	0	1	1	1	0	0	0	d__Bacteria;k__norank;p__Proteobacteria;c__Deltaproteobacteria;o__Bdellovibrionales;f__Bacteriovoracaceae;g__norank_f__Bacteriovoracaceae;s__unclassified_g__norank_f__Bacteriovoracaceae
OTU999	1	1	1	1	1	1	1	1	1	1	1	d__Bacteria;k__norank;p__Proteobacteria;c__Alphaproteobacteria;o__Rhodobacterales;f__Rhodobacteraceae;g__unclassified_f__Rhodobacteraceae;s__unclassified_f__Rhodobacteraceae
OTU1000	0	0	0	0	0	0	1	1	0	0	0	d__Bacteria;k__norank;p__Proteobacteria;c__Deltaproteobacteria;o__Oligoflexales;f__Oligoflexaceae;g__norank_f__Oligoflexaceae;s__unclassified_g__norank_f__Oligoflexaceae
OTU1001	0	0	1	1	0	0	1	1	0	0	0	d__Bacteria;k__norank;p__Marinimicrobia__SAR406_clade_;c__norank_p__Marinimicrobia__SAR406_clade_;o__norank_p__Marinimicrobia__SAR406_clade_;f__norank_p__Marinimicrobia__SAR406_clade_;g__norank_p__Marinimicrobia__SAR406_clade_;s__hydrothermal_vent_metagenome_g__norank_p__Marinimicrobia__SAR406_clade_
OTU1002	0	0	0	1	1	1	1	1	1	1	1	d__Bacteria;k__norank;p__Proteobacteria;c__Alphaproteobacteria;o__Rhizobiales;f__Bradyrhizobiaceae;g__Bosea;s__unclassified_g__Bosea
OTU1003	0	0	1	0	0	0	1	0	0	0	0	d__Bacteria;k__norank;p__Proteobacteria;c__Alphaproteobacteria;o__Rhodospirillales;f__Rhodospirillaceae;g__AEGEAN-169_marine_group;s__uncultured_bacterium_g__AEGEAN-169_marine_group
OTU1004	1	0	1	1	1	1	1	1	1	1	1	d__Bacteria;k__norank;p__Proteobacteria;c__Alphaproteobacteria;o__Sphingomonadales;f__Erythrobacteraceae;g__unclassified_f__Erythrobacteraceae;s__unclassified_f__Erythrobacteraceae
OTU1005	0	1	1	1	0	1	1	1	0	0	0	d__Bacteria;k__norank;p__Proteobacteria;c__Alphaproteobacteria;o__Rhodospirillales;f__Rhodospirillaceae;g__norank_f__Rhodospirillaceae;s__uncultured_nuHF2_cluster_bacterium_HF0500_39O04
OTU1006	0	0	1	1	0	0	1	1	0	0	0	d__Bacteria;k__norank;p__Marinimicrobia__SAR406_clade_;c__norank_p__Marinimicrobia__SAR406_clade_;o__norank_p__Marinimicrobia__SAR406_clade_;f__norank_p__Marinimicrobia__SAR406_clade_;g__norank_p__Marinimicrobia__SAR406_clade_;s__unclassified_g__norank_p__Marinimicrobia__SAR406_clade_
OTU1007	1	1	1	0	0	1	1	1	0	0	0	d__Bacteria;k__norank;p__Actinobacteria;c__Actinobacteria;o__Propionibacteriales;f__Propionibacteriaceae;g__norank_f__Propionibacteriaceae;s__unclassified_g__norank_f__Propionibacteriaceae
OTU1008	0	0	0	0	0	0	1	1	0	0	0	d__Bacteria;k__norank;p__Proteobacteria;c__Deltaproteobacteria;o__Myxococcales;f__Blfdi19;g__norank_f__Blfdi19;s__uncultured_bacterium_g__norank_f__Blfdi19
OTU1009	0	0	1	1	0	1	1	1	0	0	0	d__Bacteria;k__norank;p__Bacteroidetes;c__unclassified_p__Bacteroidetes;o__unclassified_p__Bacteroidetes;f__unclassified_p__Bacteroidetes;g__unclassified_p__Bacteroidetes;s__unclassified_p__Bacteroidetes
OTU1010	0	0	1	0	0	0	1	0	0	0	0	d__Bacteria;k__norank;p__Chloroflexi;c__SAR202_clade;o__norank_c__SAR202_clade;f__norank_c__SAR202_clade;g__norank_c__SAR202_clade;s__unclassified_g__norank_c__SAR202_clade
OTU1011	0	1	1	1	1	1	1	1	1	1	1	d__Bacteria;k__norank;p__Proteobacteria;c__Alphaproteobacteria;o__Rhodospirillales;f__Rhodospirillaceae;g__AEGEAN-169_marine_group;s__unclassified_g__AEGEAN-169_marine_group
OTU1012	0	0	0	0	0	0	1	1	1	0	0	d__Bacteria;k__norank;p__Cyanobacteria;c__Cyanobacteria;o__norank_c__Cyanobacteria;f__norank_c__Cyanobacteria;g__norank_c__Cyanobacteria;s__unclassified_g__norank_c__Cyanobacteria
OTU1013	0	0	1	1	0	0	1	1	0	0	0	d__Bacteria;k__norank;p__Proteobacteria;c__Alphaproteobacteria;o__Sneathiellales;f__Sneathiellaceae;g__norank_f__Sneathiellaceae;s__uncultured_marine_microorganism_g__norank_f__Sneathiellaceae
OTU1014	0	1	1	0	1	1	1	1	1	1	1	d__Bacteria;k__norank;p__Proteobacteria;c__Deltaproteobacteria;o__Myxococcales;f__P3OB-42;g__norank_f__P3OB-42;s__unclassified_g__norank_f__P3OB-42
OTU1015	0	0	1	0	0	0	1	0	0	0	0	d__Bacteria;k__norank;p__Nitrospinae;c__Nitrospinia;o__Nitrospinales;f__Nitrospinaceae;g__Nitrospina;s__unclassified_g__Nitrospina
OTU1016	0	0	1	1	0	1	1	1	0	0	0	d__Bacteria;k__norank;p__Proteobacteria;c__Deltaproteobacteria;o__Bdellovibrionales;f__Bdellovibrionaceae;g__OM27_clade;s__uncultured_bacterium_g__OM27_clade
OTU1017	0	0	1	0	0	0	1	0	0	0	0	d__Bacteria;k__norank;p__Proteobacteria;c__Alphaproteobacteria;o__Rhodospirillales;f__Rhodospirillaceae;g__AEGEAN-169_marine_group;s__unclassified_g__AEGEAN-169_marine_group
OTU1018	0	0	0	1	0	0	1	0	0	0	0	d__Bacteria;k__norank;p__Verrucomicrobia;c__WCHB1-41;o__norank_c__WCHB1-41;f__norank_c__WCHB1-41;g__norank_c__WCHB1-41;s__unclassified_g__norank_c__WCHB1-41
OTU1019	1	0	1	1	1	1	1	1	1	1	1	d__Bacteria;k__norank;p__Proteobacteria;c__Alphaproteobacteria;o__Rhodobacterales;f__Rhodobacteraceae;g__Nautella;s__uncultured_alpha_proteobacterium_g__Nautella
OTU1020	0	0	0	1	0	0	1	0	1	0	0	d__Bacteria;k__norank;p__Proteobacteria;c__Gammaproteobacteria;o__Oceanospirillales;f__Oceanospirillaceae;g__Thalassolituus;s__uncultured_gamma_proteobacterium_g__Thalassolituus
OTU1021	0	0	0	0	0	0	1	0	0	0	0	d__Bacteria;k__norank;p__Proteobacteria;c__Alphaproteobacteria;o__unclassified_c__Alphaproteobacteria;f__unclassified_c__Alphaproteobacteria;g__unclassified_c__Alphaproteobacteria;s__unclassified_c__Alphaproteobacteria
OTU1022	0	0	0	1	0	0	0	1	0	0	0	d__Bacteria;k__norank;p__Planctomycetes;c__OM190;o__norank_c__OM190;f__norank_c__OM190;g__norank_c__OM190;s__marine_metagenome_g__norank_c__OM190
OTU1023	0	0	0	0	0	0	0	1	0	0	0	d__Bacteria;k__norank;p__Chloroflexi;c__SAR202_clade;o__norank_c__SAR202_clade;f__norank_c__SAR202_clade;g__norank_c__SAR202_clade;s__uncultured_bacterium_g__norank_c__SAR202_clade
OTU1024	0	0	1	1	0	0	1	1	0	0	0	d__Bacteria;k__norank;p__Proteobacteria;c__Gammaproteobacteria;o__KI89A_clade;f__norank_o__KI89A_clade;g__norank_o__KI89A_clade;s__uncultured_marine_microorganism_g__norank_o__KI89A_clade
OTU1025	0	0	1	1	0	0	1	1	0	0	0	d__Bacteria;k__norank;p__Marinimicrobia__SAR406_clade_;c__norank_p__Marinimicrobia__SAR406_clade_;o__norank_p__Marinimicrobia__SAR406_clade_;f__norank_p__Marinimicrobia__SAR406_clade_;g__norank_p__Marinimicrobia__SAR406_clade_;s__uncultured_marine_microorganism_g__norank_p__Marinimicrobia__SAR406_clade_
OTU1026	0	0	0	1	0	0	1	1	0	0	0	d__Bacteria;k__norank;p__Proteobacteria;c__Deltaproteobacteria;o__Bradymonadales;f__norank_o__Bradymonadales;g__norank_o__Bradymonadales;s__uncultured_delta_proteobacterium_DeepAnt-32C6
OTU1027	0	0	1	1	0	0	1	1	0	0	0	d__Bacteria;k__norank;p__Verrucomicrobia;c__Opitutae;o__MB11C04_marine_group;f__norank_o__MB11C04_marine_group;g__norank_o__MB11C04_marine_group;s__uncultured_marine_microorganism_g__norank_o__MB11C04_marine_group
OTU1028	0	0	0	0	0	0	0	1	0	0	0	d__Bacteria;k__norank;p__Chloroflexi;c__SAR202_clade;o__norank_c__SAR202_clade;f__norank_c__SAR202_clade;g__norank_c__SAR202_clade;s__unclassified_g__norank_c__SAR202_clade
OTU1029	0	0	1	1	0	0	1	1	0	0	0	d__Bacteria;k__norank;p__Gemmatimonadetes;c__Gemmatimonadetes;o__norank_c__Gemmatimonadetes;f__norank_c__Gemmatimonadetes;g__norank_c__Gemmatimonadetes;s__uncultured_sponge_symbiont_PAUC43f
OTU1030	0	0	1	0	0	0	1	1	0	0	0	d__Bacteria;k__norank;p__Proteobacteria;c__Deltaproteobacteria;o__Bdellovibrionales;f__Bdellovibrionaceae;g__OM27_clade;s__unclassified_g__OM27_clade
OTU1031	0	0	0	1	0	0	0	1	0	0	0	d__Bacteria;k__norank;p__Proteobacteria;c__Deltaproteobacteria;o__Desulfurellales;f__Desulfurellaceae;g__H16;s__hydrothermal_vent_metagenome_g__H16
OTU1032	0	0	0	1	0	0	0	1	0	0	0	d__Bacteria;k__norank;p__Proteobacteria;c__Alphaproteobacteria;o__Rhizobiales;f__Aurantimonadaceae;g__unclassified_f__Aurantimonadaceae;s__unclassified_f__Aurantimonadaceae
OTU1033	0	0	1	0	0	0	1	1	0	0	0	d__Bacteria;k__norank;p__Proteobacteria;c__Deltaproteobacteria;o__Bdellovibrionales;f__Bdellovibrionaceae;g__OM27_clade;s__uncultured_bacterium_g__OM27_clade
OTU1034	0	0	1	1	0	0	0	1	0	0	0	d__Bacteria;k__norank;p__Chloroflexi;c__SAR202_clade;o__norank_c__SAR202_clade;f__norank_c__SAR202_clade;g__norank_c__SAR202_clade;s__uncultured_deep-sea_bacterium_g__norank_c__SAR202_clade
OTU1035	0	0	0	0	0	0	0	1	0	0	1	d__Bacteria;k__norank;p__Proteobacteria;c__Gammaproteobacteria;o__Pseudomonadales;f__Moraxellaceae;g__Enhydrobacter;s__Moraxella_osloensis_g__Enhydrobacter
OTU1036	0	0	0	1	0	0	1	1	0	0	0	d__Bacteria;k__norank;p__Proteobacteria;c__Deltaproteobacteria;o__Desulfurellales;f__Desulfurellaceae;g__H16;s__uncultured_sediment_bacterium_g__H16
OTU1037	0	1	1	1	0	1	1	1	1	1	0	d__Bacteria;k__norank;p__Marinimicrobia__SAR406_clade_;c__norank_p__Marinimicrobia__SAR406_clade_;o__norank_p__Marinimicrobia__SAR406_clade_;f__norank_p__Marinimicrobia__SAR406_clade_;g__norank_p__Marinimicrobia__SAR406_clade_;s__unclassified_g__norank_p__Marinimicrobia__SAR406_clade_
OTU1038	0	0	1	0	0	0	1	1	0	0	0	d__Bacteria;k__norank;p__Proteobacteria;c__Gammaproteobacteria;o__norank_c__Gammaproteobacteria;f__norank_c__Gammaproteobacteria;g__norank_c__Gammaproteobacteria;s__unclassified_g__norank_c__Gammaproteobacteria
OTU1039	0	0	0	0	0	0	0	1	0	0	0	d__Bacteria;k__norank;p__Chloroflexi;c__SAR202_clade;o__norank_c__SAR202_clade;f__norank_c__SAR202_clade;g__norank_c__SAR202_clade;s__uncultured_bacterium_g__norank_c__SAR202_clade
OTU1040	0	0	1	1	0	0	1	1	0	0	0	d__Bacteria;k__norank;p__Acidobacteria;c__Acidobacteria;o__Subgroup_10;f__NS72;g__norank_f__NS72;s__unclassified_g__norank_f__NS72
OTU1041	0	0	1	1	0	0	1	1	0	0	0	d__Bacteria;k__norank;p__Proteobacteria;c__Alphaproteobacteria;o__Rhodospirillales;f__Rhodospirillaceae;g__AEGEAN-169_marine_group;s__uncultured_bacterium_g__AEGEAN-169_marine_group
OTU1042	0	0	1	1	0	0	1	1	0	0	0	d__Bacteria;k__norank;p__Chloroflexi;c__SAR202_clade;o__norank_c__SAR202_clade;f__norank_c__SAR202_clade;g__norank_c__SAR202_clade;s__uncultured_bacterium_g__norank_c__SAR202_clade
OTU1043	1	0	0	1	1	0	0	1	1	0	0	d__Bacteria;k__norank;p__Proteobacteria;c__SPOTSOCT00m83;o__norank_c__SPOTSOCT00m83;f__norank_c__SPOTSOCT00m83;g__norank_c__SPOTSOCT00m83;s__uncultured_bacterium_g__norank_c__SPOTSOCT00m83
OTU1044	0	0	0	1	0	0	0	1	0	1	0	d__Bacteria;k__norank;p__Proteobacteria;c__Gammaproteobacteria;o__Legionellales;f__Legionellaceae;g__Legionella;s__unclassified_g__Legionella
OTU1045	0	0	0	0	0	0	0	1	0	0	0	d__Bacteria;k__norank;p__Verrucomicrobia;c__Opitutae;o__unclassified_c__Opitutae;f__unclassified_c__Opitutae;g__unclassified_c__Opitutae;s__unclassified_c__Opitutae
OTU1046	0	0	1	1	0	1	1	1	0	0	0	d__Bacteria;k__norank;p__Marinimicrobia__SAR406_clade_;c__norank_p__Marinimicrobia__SAR406_clade_;o__norank_p__Marinimicrobia__SAR406_clade_;f__norank_p__Marinimicrobia__SAR406_clade_;g__norank_p__Marinimicrobia__SAR406_clade_;s__uncultured_marine_microorganism_g__norank_p__Marinimicrobia__SAR406_clade_
OTU1047	0	0	0	1	0	0	0	1	0	0	0	d__Bacteria;k__norank;p__Chloroflexi;c__SAR202_clade;o__norank_c__SAR202_clade;f__norank_c__SAR202_clade;g__norank_c__SAR202_clade;s__uncultured_bacterium_g__norank_c__SAR202_clade
OTU1048	0	0	1	1	0	0	1	1	0	0	0	d__Bacteria;k__norank;p__Proteobacteria;c__Gammaproteobacteria;o__unclassified_c__Gammaproteobacteria;f__unclassified_c__Gammaproteobacteria;g__unclassified_c__Gammaproteobacteria;s__unclassified_c__Gammaproteobacteria
OTU1049	0	0	0	0	0	0	1	1	0	0	0	d__Bacteria;k__norank;p__Proteobacteria;c__Gammaproteobacteria;o__E01-9C-26_marine_group;f__norank_o__E01-9C-26_marine_group;g__norank_o__E01-9C-26_marine_group;s__uncultured_organism_g__norank_o__E01-9C-26_marine_group
OTU1050	0	0	1	0	0	0	1	1	0	0	0	d__Bacteria;k__norank;p__Proteobacteria;c__Deltaproteobacteria;o__Bradymonadales;f__norank_o__Bradymonadales;g__norank_o__Bradymonadales;s__uncultured_deep-sea_bacterium_g__norank_o__Bradymonadales
OTU1051	0	0	1	0	0	0	0	1	0	0	0	d__Bacteria;k__norank;p__Proteobacteria;c__Deltaproteobacteria;o__Bdellovibrionales;f__Bdellovibrionaceae;g__OM27_clade;s__unclassified_g__OM27_clade
OTU1052	0	0	1	1	0	0	1	1	0	0	0	d__Bacteria;k__norank;p__Marinimicrobia__SAR406_clade_;c__norank_p__Marinimicrobia__SAR406_clade_;o__norank_p__Marinimicrobia__SAR406_clade_;f__norank_p__Marinimicrobia__SAR406_clade_;g__norank_p__Marinimicrobia__SAR406_clade_;s__uncultured_Candidatus_Marinimicrobia_bacterium_g__norank_p__Marinimicrobia__SAR406_clade_
OTU1053	0	0	1	1	0	0	1	1	0	0	0	d__Bacteria;k__norank;p__Proteobacteria;c__Deltaproteobacteria;o__Bdellovibrionales;f__Bdellovibrionaceae;g__OM27_clade;s__uncultured_delta_proteobacterium_g__OM27_clade
OTU1054	0	0	1	1	0	0	0	1	0	0	0	d__Bacteria;k__norank;p__Chloroflexi;c__SAR202_clade;o__norank_c__SAR202_clade;f__norank_c__SAR202_clade;g__norank_c__SAR202_clade;s__Chloroflexi_bacterium_SCGC_AB-629-P13
OTU1055	0	0	0	0	0	0	1	1	0	0	0	d__Bacteria;k__norank;p__Proteobacteria;c__Betaproteobacteria;o__Burkholderiales;f__Alcaligenaceae;g__Achromobacter;s__unclassified_g__Achromobacter
OTU1056	0	0	1	1	0	0	1	1	0	0	0	d__Bacteria;k__norank;p__PAUC34f;c__norank_p__PAUC34f;o__norank_p__PAUC34f;f__norank_p__PAUC34f;g__norank_p__PAUC34f;s__uncultured_marine_bacterium_g__norank_p__PAUC34f
OTU1057	0	0	1	1	0	1	1	1	0	0	0	d__Bacteria;k__norank;p__Firmicutes;c__Bacilli;o__Lactobacillales;f__Streptococcaceae;g__Streptococcus;s__unclassified_g__Streptococcus
OTU1058	0	0	1	1	0	1	1	1	0	0	0	d__Bacteria;k__norank;p__Marinimicrobia__SAR406_clade_;c__norank_p__Marinimicrobia__SAR406_clade_;o__norank_p__Marinimicrobia__SAR406_clade_;f__norank_p__Marinimicrobia__SAR406_clade_;g__norank_p__Marinimicrobia__SAR406_clade_;s__unclassified_g__norank_p__Marinimicrobia__SAR406_clade_
OTU1059	0	0	0	1	0	0	0	1	0	0	0	d__Bacteria;k__norank;p__Proteobacteria;c__Deltaproteobacteria;o__NB1-j;f__norank_o__NB1-j;g__norank_o__NB1-j;s__hydrothermal_vent_metagenome_g__norank_o__NB1-j
OTU1060	0	0	1	1	0	0	1	1	0	0	0	d__Bacteria;k__norank;p__Chloroflexi;c__SAR202_clade;o__norank_c__SAR202_clade;f__norank_c__SAR202_clade;g__norank_c__SAR202_clade;s__uncultured_Chloroflexales_bacterium_g__norank
OTU1061	0	0	1	0	0	0	0	1	0	0	0	d__Bacteria;k__norank;p__Firmicutes;c__Bacilli;o__Bacillales;f__Planococcaceae;g__Chryseomicrobium;s__uncultured_bacterium_g__Chryseomicrobium
OTU1062	0	0	1	1	0	0	1	1	0	0	0	d__Bacteria;k__norank;p__Chloroflexi;c__SAR202_clade;o__norank_c__SAR202_clade;f__norank_c__SAR202_clade;g__norank_c__SAR202_clade;s__unclassified_g__norank_c__SAR202_clade
OTU1063	0	0	0	0	0	0	0	1	0	0	0	d__Bacteria;k__norank;p__Chloroflexi;c__Anaerolineae;o__Anaerolineales;f__Anaerolineaceae;g__norank_f__Anaerolineaceae;s__unclassified_g__norank_f__Anaerolineaceae
OTU1064	0	0	0	1	0	0	0	1	1	0	0	d__Bacteria;k__norank;p__Firmicutes;c__Bacilli;o__Lactobacillales;f__Aerococcaceae;g__Aerococcus;s__unclassified_g__Aerococcus
OTU1065	0	0	1	0	0	0	1	1	0	0	0	d__Bacteria;k__norank;p__Planctomycetes;c__Phycisphaerae;o__Phycisphaerales;f__Phycisphaeraceae;g__CL500-3;s__uncultured_bacterium_g__CL500-3
OTU1066	0	0	1	0	0	0	0	1	0	0	0	d__Bacteria;k__norank;p__Actinobacteria;c__Actinobacteria;o__Actinomycetales;f__Actinomycetaceae;g__Actinomyces;s__unclassified_g__Actinomyces
OTU1067	0	0	0	1	0	0	0	1	0	0	0	d__Bacteria;k__norank;p__Chloroflexi;c__SAR202_clade;o__norank_c__SAR202_clade;f__norank_c__SAR202_clade;g__norank_c__SAR202_clade;s__unclassified_g__norank_c__SAR202_clade
OTU1068	0	0	1	1	0	0	1	1	0	0	0	d__Bacteria;k__norank;p__Chloroflexi;c__SAR202_clade;o__norank_c__SAR202_clade;f__norank_c__SAR202_clade;g__norank_c__SAR202_clade;s__unclassified_g__norank_c__SAR202_clade
OTU1069	0	0	1	0	0	1	1	1	0	0	0	d__Bacteria;k__norank;p__Proteobacteria;c__Deltaproteobacteria;o__Bdellovibrionales;f__Bdellovibrionaceae;g__OM27_clade;s__uncultured_delta_proteobacterium_g__OM27_clade
OTU1070	0	0	0	1	0	0	0	1	0	0	0	d__Bacteria;k__norank;p__Proteobacteria;c__Deltaproteobacteria;o__unclassified_c__Deltaproteobacteria;f__unclassified_c__Deltaproteobacteria;g__unclassified_c__Deltaproteobacteria;s__unclassified_c__Deltaproteobacteria
OTU1071	0	0	0	1	0	1	1	1	0	0	0	d__Bacteria;k__norank;p__unclassified_k__norank;c__unclassified_k__norank;o__unclassified_k__norank;f__unclassified_k__norank;g__unclassified_k__norank;s__unclassified_k__norank
OTU1072	0	0	0	0	0	0	0	1	0	0	0	d__Bacteria;k__norank;p__Cyanobacteria;c__Cyanobacteria;o__norank_c__Cyanobacteria;f__norank_c__Cyanobacteria;g__norank_c__Cyanobacteria;s__unclassified_g__norank_c__Cyanobacteria
OTU1073	0	0	1	1	0	0	1	1	0	0	1	d__Bacteria;k__norank;p__Proteobacteria;c__Gammaproteobacteria;o__Alteromonadales;f__Moritellaceae;g__Moritella;s__Moritella_viscosa
OTU1074	0	0	0	1	0	0	1	1	0	0	0	d__Bacteria;k__norank;p__Chloroflexi;c__SAR202_clade;o__norank_c__SAR202_clade;f__norank_c__SAR202_clade;g__norank_c__SAR202_clade;s__uncultured_Thermomicrobium_sp._g__norank
OTU1075	0	0	1	0	0	0	1	1	0	0	0	d__Bacteria;k__norank;p__Chloroflexi;c__SAR202_clade;o__norank_c__SAR202_clade;f__norank_c__SAR202_clade;g__norank_c__SAR202_clade;s__unclassified_g__norank_c__SAR202_clade
OTU1076	0	0	0	1	0	0	0	1	0	0	0	d__Bacteria;k__norank;p__Chloroflexi;c__SAR202_clade;o__norank_c__SAR202_clade;f__norank_c__SAR202_clade;g__norank_c__SAR202_clade;s__uncultured_bacterium_g__norank_c__SAR202_clade
OTU1077	1	0	0	0	0	0	1	1	0	1	1	d__Bacteria;k__norank;p__Proteobacteria;c__Deltaproteobacteria;o__Bradymonadales;f__norank_o__Bradymonadales;g__norank_o__Bradymonadales;s__unclassified_g__norank_o__Bradymonadales
OTU1078	0	0	0	1	0	0	1	1	0	0	0	d__Bacteria;k__norank;p__Acidobacteria;c__Acidobacteria;o__norank_c__Acidobacteria;f__norank_c__Acidobacteria;g__norank_c__Acidobacteria;s__unclassified_g__norank_c__Acidobacteria
OTU1079	0	0	1	0	0	0	1	1	0	0	0	d__Bacteria;k__norank;p__Marinimicrobia__SAR406_clade_;c__norank_p__Marinimicrobia__SAR406_clade_;o__norank_p__Marinimicrobia__SAR406_clade_;f__norank_p__Marinimicrobia__SAR406_clade_;g__norank_p__Marinimicrobia__SAR406_clade_;s__unclassified_g__norank_p__Marinimicrobia__SAR406_clade_
OTU1080	0	0	1	1	0	0	1	1	0	0	0	d__Bacteria;k__norank;p__Chloroflexi;c__SAR202_clade;o__norank_c__SAR202_clade;f__norank_c__SAR202_clade;g__norank_c__SAR202_clade;s__uncultured_bacterium_g__norank_c__SAR202_clade
OTU1081	0	0	0	1	0	0	0	1	0	0	0	d__Bacteria;k__norank;p__Planctomycetes;c__Phycisphaerae;o__Phycisphaerales;f__Phycisphaeraceae;g__Urania-1B-19_marine_sediment_group;s__unclassified_g__Urania-1B-19_marine_sediment_group
OTU1082	0	0	1	1	0	0	1	1	0	0	0	d__Bacteria;k__norank;p__Lentisphaerae;c__Lentisphaeria;o__Victivallales;f__Arctic95B-14;g__norank_f__Arctic95B-14;s__uncultured_bacterium_AD106-G5
OTU1083	0	1	1	0	0	1	1	1	0	0	0	d__Bacteria;k__norank;p__Proteobacteria;c__Deltaproteobacteria;o__Bdellovibrionales;f__Bacteriovoracaceae;g__norank_f__Bacteriovoracaceae;s__unclassified_g__norank_f__Bacteriovoracaceae
OTU1084	0	0	1	1	0	0	1	1	0	0	0	d__Bacteria;k__norank;p__Planctomycetes;c__Phycisphaerae;o__Phycisphaerales;f__Phycisphaeraceae;g__CL500-3;s__unclassified_g__CL500-3
OTU1085	0	0	1	1	0	0	1	1	1	0	0	d__Bacteria;k__norank;p__Nitrospinae;c__Nitrospinia;o__Nitrospinales;f__Nitrospinaceae;g__norank_f__Nitrospinaceae;s__uncultured_organism_g__norank_f__Nitrospinaceae
OTU1086	0	0	0	0	0	0	0	1	0	0	0	d__Bacteria;k__norank;p__Chloroflexi;c__SAR202_clade;o__norank_c__SAR202_clade;f__norank_c__SAR202_clade;g__norank_c__SAR202_clade;s__unclassified_g__norank_c__SAR202_clade
OTU1087	0	0	1	1	0	1	1	1	0	0	0	d__Bacteria;k__norank;p__Planctomycetes;c__Phycisphaerae;o__Phycisphaerales;f__Phycisphaeraceae;g__JL-ETNP-F27;s__uncultured_planctomycete_g__JL-ETNP-F27
OTU1088	0	0	1	1	0	0	1	1	0	0	0	d__Bacteria;k__norank;p__Chloroflexi;c__SAR202_clade;o__norank_c__SAR202_clade;f__norank_c__SAR202_clade;g__norank_c__SAR202_clade;s__unclassified_g__norank_c__SAR202_clade
OTU1089	0	0	1	1	0	0	1	1	0	0	0	d__Bacteria;k__norank;p__Verrucomicrobia;c__Arctic97B-4_marine_group;o__norank_c__Arctic97B-4_marine_group;f__norank_c__Arctic97B-4_marine_group;g__norank_c__Arctic97B-4_marine_group;s__unclassified_g__norank_c__Arctic97B-4_marine_group
OTU1090	0	0	0	0	0	0	0	1	0	0	0	d__Bacteria;k__norank;p__Chloroflexi;c__SAR202_clade;o__norank_c__SAR202_clade;f__norank_c__SAR202_clade;g__norank_c__SAR202_clade;s__unclassified_g__norank_c__SAR202_clade
OTU1091	0	0	0	1	0	0	1	1	0	0	0	d__Bacteria;k__norank;p__PAUC34f;c__norank_p__PAUC34f;o__norank_p__PAUC34f;f__norank_p__PAUC34f;g__norank_p__PAUC34f;s__hydrothermal_vent_metagenome_g__norank_p__PAUC34f
OTU1092	0	0	0	1	0	0	0	1	0	0	0	d__Bacteria;k__norank;p__Firmicutes;c__Negativicutes;o__Selenomonadales;f__Veillonellaceae;g__Veillonella;s__unclassified_g__Veillonella
OTU1093	0	0	0	1	0	0	1	1	0	0	0	d__Bacteria;k__norank;p__Proteobacteria;c__Deltaproteobacteria;o__SAR324_clade_Marine_group_B_;f__norank_o__SAR324_clade_Marine_group_B_;g__norank_o__SAR324_clade_Marine_group_B_;s__unclassified_g__norank_o__SAR324_clade_Marine_group_B_
OTU1094	0	0	1	1	0	0	1	1	0	0	0	d__Bacteria;k__norank;p__Proteobacteria;c__Gammaproteobacteria;o__E01-9C-26_marine_group;f__norank_o__E01-9C-26_marine_group;g__norank_o__E01-9C-26_marine_group;s__uncultured_marine_microorganism_g__norank_o__E01-9C-26_marine_group
OTU1095	0	0	1	1	0	0	1	1	0	0	0	d__Bacteria;k__norank;p__Planctomycetes;c__Pla3_lineage;o__norank_c__Pla3_lineage;f__norank_c__Pla3_lineage;g__norank_c__Pla3_lineage;s__hydrothermal_vent_metagenome_g__norank_c__Pla3_lineage
OTU1096	0	0	0	1	0	0	1	1	0	0	0	d__Bacteria;k__norank;p__Chloroflexi;c__SAR202_clade;o__norank_c__SAR202_clade;f__norank_c__SAR202_clade;g__norank_c__SAR202_clade;s__unclassified_g__norank_c__SAR202_clade
OTU1097	0	0	1	1	0	0	1	1	0	0	0	d__Bacteria;k__norank;p__Marinimicrobia__SAR406_clade_;c__norank_p__Marinimicrobia__SAR406_clade_;o__norank_p__Marinimicrobia__SAR406_clade_;f__norank_p__Marinimicrobia__SAR406_clade_;g__norank_p__Marinimicrobia__SAR406_clade_;s__uncultured_marine_microorganism_g__norank_p__Marinimicrobia__SAR406_clade_
OTU1098	0	0	1	1	0	0	1	1	0	0	0	d__Bacteria;k__norank;p__Chloroflexi;c__SAR202_clade;o__norank_c__SAR202_clade;f__norank_c__SAR202_clade;g__norank_c__SAR202_clade;s__unclassified_g__norank_c__SAR202_clade
OTU1099	0	0	0	1	0	0	1	1	1	1	1	d__Bacteria;k__norank;p__Planctomycetes;c__OM190;o__norank_c__OM190;f__norank_c__OM190;g__norank_c__OM190;s__uncultured_bacterium_g__norank_c__OM190
OTU1100	0	0	0	1	0	0	0	1	0	0	0	d__Bacteria;k__norank;p__Proteobacteria;c__Deltaproteobacteria;o__Oligoflexales;f__Oligoflexaceae;g__norank_f__Oligoflexaceae;s__uncultured_proteobacterium_g__norank_f__Oligoflexaceae
OTU1101	0	0	1	1	0	0	1	1	0	0	0	d__Bacteria;k__norank;p__Proteobacteria;c__Deltaproteobacteria;o__Myxococcales;f__Blfdi19;g__norank_f__Blfdi19;s__unclassified_g__norank_f__Blfdi19
OTU1102	0	0	0	0	0	0	1	1	0	0	0	d__Bacteria;k__norank;p__Proteobacteria;c__Deltaproteobacteria;o__Bdellovibrionales;f__Bdellovibrionaceae;g__OM27_clade;s__unclassified_g__OM27_clade
OTU1103	0	0	0	1	0	0	1	1	0	0	0	d__Bacteria;k__norank;p__Chloroflexi;c__SAR202_clade;o__norank_c__SAR202_clade;f__norank_c__SAR202_clade;g__norank_c__SAR202_clade;s__uncultured_bacterium_g__norank_c__SAR202_clade
OTU1104	0	0	0	1	0	0	0	1	0	0	0	d__Bacteria;k__norank;p__Marinimicrobia__SAR406_clade_;c__norank_p__Marinimicrobia__SAR406_clade_;o__norank_p__Marinimicrobia__SAR406_clade_;f__norank_p__Marinimicrobia__SAR406_clade_;g__norank_p__Marinimicrobia__SAR406_clade_;s__uncultured_bacterium_g__norank_p__Marinimicrobia__SAR406_clade_
OTU1105	0	0	1	0	0	0	1	1	0	0	0	d__Bacteria;k__norank;p__Acidobacteria;c__Acidobacteria;o__norank_c__Acidobacteria;f__norank_c__Acidobacteria;g__norank_c__Acidobacteria;s__uncultured_bacterium_KM3-18-F8
OTU1106	0	0	0	0	0	0	0	1	0	0	0	d__Bacteria;k__norank;p__Chloroflexi;c__SAR202_clade;o__norank_c__SAR202_clade;f__norank_c__SAR202_clade;g__norank_c__SAR202_clade;s__unclassified_g__norank_c__SAR202_clade
OTU1107	0	0	1	0	0	0	1	1	0	0	0	d__Bacteria;k__norank;p__Proteobacteria;c__Gammaproteobacteria;o__Xanthomonadales;f__norank_o__Xanthomonadales;g__norank_o__Xanthomonadales;s__uncultured_bacterium_KM3-69-F5
OTU1108	0	0	0	1	0	0	0	1	0	0	0	d__Bacteria;k__norank;p__Chloroflexi;c__SAR202_clade;o__norank_c__SAR202_clade;f__norank_c__SAR202_clade;g__norank_c__SAR202_clade;s__unclassified_g__norank_c__SAR202_clade
OTU1109	0	0	1	0	0	0	1	1	0	0	0	d__Bacteria;k__norank;p__Proteobacteria;c__Deltaproteobacteria;o__NB1-j;f__norank_o__NB1-j;g__norank_o__NB1-j;s__unclassified_g__norank_o__NB1-j
OTU1110	0	0	1	1	0	0	1	1	0	0	0	d__Bacteria;k__norank;p__Proteobacteria;c__Deltaproteobacteria;o__Myxococcales;f__P3OB-42;g__norank_f__P3OB-42;s__uncultured_bacterium_g__norank_f__P3OB-42
OTU1111	0	0	1	1	0	0	1	1	0	0	0	d__Bacteria;k__norank;p__Acidobacteria;c__Acidobacteria;o__norank_c__Acidobacteria;f__norank_c__Acidobacteria;g__norank_c__Acidobacteria;s__uncultured_deep-sea_bacterium_g__norank_c__Acidobacteria
OTU1112	0	0	1	0	0	0	1	1	0	0	0	d__Bacteria;k__norank;p__Proteobacteria;c__Deltaproteobacteria;o__unclassified_c__Deltaproteobacteria;f__unclassified_c__Deltaproteobacteria;g__unclassified_c__Deltaproteobacteria;s__unclassified_c__Deltaproteobacteria
OTU1113	0	0	0	1	0	0	1	1	0	0	0	d__Bacteria;k__norank;p__Verrucomicrobia;c__WCHB1-41;o__norank_c__WCHB1-41;f__norank_c__WCHB1-41;g__norank_c__WCHB1-41;s__uncultured_bacterium_AD45-G12
OTU1114	0	0	0	0	0	0	1	1	0	0	0	d__Bacteria;k__norank;p__Proteobacteria;c__Deltaproteobacteria;o__Myxococcales;f__Eel-36e1D6;g__norank_f__Eel-36e1D6;s__uncultured_delta_proteobacterium_g__norank_f__Eel-36e1D6
OTU1115	0	0	1	1	0	0	0	1	0	0	0	d__Bacteria;k__norank;p__Proteobacteria;c__Deltaproteobacteria;o__NB1-j;f__norank_o__NB1-j;g__norank_o__NB1-j;s__uncultured_bacterium_g__norank_o__NB1-j
OTU1116	0	0	1	1	0	0	1	1	0	0	0	d__Bacteria;k__norank;p__Chloroflexi;c__SAR202_clade;o__norank_c__SAR202_clade;f__norank_c__SAR202_clade;g__norank_c__SAR202_clade;s__uncultured_bacterium_HF0500_03M05
OTU1117	1	0	0	0	0	0	0	1	0	0	0	d__Bacteria;k__norank;p__Proteobacteria;c__Gammaproteobacteria;o__Cellvibrionales;f__Spongiibacteraceae;g__BD1-7_clade;s__unclassified_g__BD1-7_clade
OTU1118	0	0	0	1	0	0	0	1	0	0	0	d__Bacteria;k__norank;p__Chloroflexi;c__SAR202_clade;o__norank_c__SAR202_clade;f__norank_c__SAR202_clade;g__norank_c__SAR202_clade;s__uncultured_deep-sea_bacterium_g__norank_c__SAR202_clade
OTU1119	1	0	1	1	1	1	1	1	1	1	1	d__Bacteria;k__norank;p__Proteobacteria;c__Gammaproteobacteria;o__Alteromonadales;f__Alteromonadaceae;g__Marinobacter;s__unclassified_g__Marinobacter
OTU1120	0	0	0	1	0	0	0	1	0	0	0	d__Bacteria;k__norank;p__Proteobacteria;c__Gammaproteobacteria;o__unclassified_c__Gammaproteobacteria;f__unclassified_c__Gammaproteobacteria;g__unclassified_c__Gammaproteobacteria;s__unclassified_c__Gammaproteobacteria
OTU1121	0	0	1	1	0	1	1	1	0	0	0	d__Bacteria;k__norank;p__Verrucomicrobia;c__Arctic97B-4_marine_group;o__norank_c__Arctic97B-4_marine_group;f__norank_c__Arctic97B-4_marine_group;g__norank_c__Arctic97B-4_marine_group;s__uncultured_marine_microorganism_g__norank_c__Arctic97B-4_marine_group
OTU1122	0	0	1	0	0	0	1	1	0	0	0	d__Bacteria;k__norank;p__Proteobacteria;c__Deltaproteobacteria;o__Bdellovibrionales;f__Bdellovibrionaceae;g__OM27_clade;s__uncultured_bacterium_g__OM27_clade
OTU1123	0	0	1	0	0	1	1	1	0	0	0	d__Bacteria;k__norank;p__Proteobacteria;c__Deltaproteobacteria;o__Oligoflexales;f__Oligoflexaceae;g__norank_f__Oligoflexaceae;s__uncultured_bacterium_g__norank_f__Oligoflexaceae
OTU1124	0	0	1	1	0	0	1	1	0	0	0	d__Bacteria;k__norank;p__Proteobacteria;c__Deltaproteobacteria;o__NB1-j;f__norank_o__NB1-j;g__norank_o__NB1-j;s__hydrothermal_vent_metagenome_g__norank_o__NB1-j
OTU1125	0	0	0	0	1	0	1	1	0	0	0	d__Bacteria;k__norank;p__Actinobacteria;c__Actinobacteria;o__Rubrobacterales;f__Rubrobacteriaceae;g__Rubrobacter;s__unclassified_g__Rubrobacter
OTU1126	0	1	0	1	0	0	0	1	1	0	0	d__Bacteria;k__norank;p__Proteobacteria;c__Deltaproteobacteria;o__Bradymonadales;f__norank_o__Bradymonadales;g__norank_o__Bradymonadales;s__uncultured_deep-sea_bacterium_g__norank_o__Bradymonadales
OTU1127	0	0	1	1	0	0	1	1	0	0	0	d__Bacteria;k__norank;p__Chloroflexi;c__SAR202_clade;o__norank_c__SAR202_clade;f__norank_c__SAR202_clade;g__norank_c__SAR202_clade;s__unclassified_g__norank_c__SAR202_clade
OTU1128	0	0	0	1	0	0	0	1	0	0	0	d__Bacteria;k__norank;p__Firmicutes;c__Bacilli;o__Lactobacillales;f__Enterococcaceae;g__Enterococcus;s__Enterococcus_aquimarinus
OTU1129	0	0	1	1	0	0	0	1	0	0	0	d__Bacteria;k__norank;p__Chloroflexi;c__SAR202_clade;o__norank_c__SAR202_clade;f__norank_c__SAR202_clade;g__norank_c__SAR202_clade;s__unclassified_g__norank_c__SAR202_clade
OTU1130	1	0	0	1	0	1	1	1	1	1	1	d__Bacteria;k__norank;p__Proteobacteria;c__Gammaproteobacteria;o__Alteromonadales;f__Alteromonadaceae;g__Marinobacter;s__Marinobacter_vinifirmus
OTU1131	0	0	0	0	0	0	0	1	0	0	0	d__Bacteria;k__norank;p__Chloroflexi;c__SAR202_clade;o__norank_c__SAR202_clade;f__norank_c__SAR202_clade;g__norank_c__SAR202_clade;s__unclassified_g__norank_c__SAR202_clade
OTU1132	0	0	0	1	0	0	0	1	0	0	0	d__Bacteria;k__norank;p__Chloroflexi;c__unclassified_p__Chloroflexi;o__unclassified_p__Chloroflexi;f__unclassified_p__Chloroflexi;g__unclassified_p__Chloroflexi;s__unclassified_p__Chloroflexi
OTU1133	0	0	1	1	0	0	1	1	0	0	0	d__Bacteria;k__norank;p__Planctomycetes;c__OM190;o__norank_c__OM190;f__norank_c__OM190;g__norank_c__OM190;s__uncultured_bacterium_g__norank_c__OM190
OTU1134	0	0	1	1	0	0	1	1	0	0	0	d__Bacteria;k__norank;p__Chloroflexi;c__SAR202_clade;o__norank_c__SAR202_clade;f__norank_c__SAR202_clade;g__norank_c__SAR202_clade;s__unclassified_g__norank_c__SAR202_clade
OTU1135	0	1	1	1	0	0	1	1	0	0	0	d__Bacteria;k__norank;p__Cyanobacteria;c__Cyanobacteria;o__norank_c__Cyanobacteria;f__norank_c__Cyanobacteria;g__norank_c__Cyanobacteria;s__uncultured_Candidatus_Marinimicrobia_bacterium_g__norank
OTU1136	0	0	0	1	0	0	0	1	0	0	0	d__Bacteria;k__norank;p__unclassified_k__norank;c__unclassified_k__norank;o__unclassified_k__norank;f__unclassified_k__norank;g__unclassified_k__norank;s__unclassified_k__norank
OTU1137	0	0	1	1	0	0	1	1	0	0	0	d__Bacteria;k__norank;p__Nitrospinae;c__Nitrospinia;o__Nitrospinales;f__Nitrospinaceae;g__Nitrospina;s__unclassified_g__Nitrospina
OTU1138	1	1	1	1	1	1	1	1	1	1	1	d__Bacteria;k__norank;p__Actinobacteria;c__Actinobacteria;o__Corynebacteriales;f__Mycobacteriaceae;g__Mycobacterium;s__unclassified_g__Mycobacterium
OTU1139	0	0	1	0	0	0	1	1	0	0	0	d__Bacteria;k__norank;p__Proteobacteria;c__Deltaproteobacteria;o__Bradymonadales;f__norank_o__Bradymonadales;g__norank_o__Bradymonadales;s__uncultured_delta_proteobacterium_DeepAnt-1F12
OTU1140	0	0	0	1	0	0	1	1	0	0	0	d__Bacteria;k__norank;p__Proteobacteria;c__Alphaproteobacteria;o__Rhodospirillales;f__unclassified_o__Rhodospirillales;g__unclassified_o__Rhodospirillales;s__unclassified_o__Rhodospirillales
OTU1141	0	0	1	1	0	0	1	1	0	0	0	d__Bacteria;k__norank;p__Chloroflexi;c__Anaerolineae;o__Anaerolineales;f__Anaerolineaceae;g__norank_f__Anaerolineaceae;s__marine_metagenome_g__norank_f__Anaerolineaceae
OTU1142	0	0	1	1	0	1	1	1	0	1	0	d__Bacteria;k__norank;p__Proteobacteria;c__Alphaproteobacteria;o__SAR11_clade;f__Deep_1;g__norank_f__Deep_1;s__unclassified_g__norank_f__Deep_1
OTU1143	0	0	1	1	0	0	1	1	0	0	0	d__Bacteria;k__norank;p__Proteobacteria;c__Alphaproteobacteria;o__Sneathiellales;f__Sneathiellaceae;g__norank_f__Sneathiellaceae;s__uncultured_alpha_proteobacterium_g__norank_f__Sneathiellaceae
OTU1144	0	0	0	1	0	0	1	1	0	0	0	d__Bacteria;k__norank;p__Chloroflexi;c__S085;o__norank_c__S085;f__norank_c__S085;g__norank_c__S085;s__uncultured_Chloroflexus_sp._g__norank_c__S085
OTU1145	0	0	0	0	0	0	0	1	0	0	0	d__Bacteria;k__norank;p__Proteobacteria;c__Gammaproteobacteria;o__unclassified_c__Gammaproteobacteria;f__unclassified_c__Gammaproteobacteria;g__unclassified_c__Gammaproteobacteria;s__unclassified_c__Gammaproteobacteria
OTU1146	0	0	1	1	0	0	1	1	0	0	0	d__Bacteria;k__norank;p__Chloroflexi;c__SAR202_clade;o__norank_c__SAR202_clade;f__norank_c__SAR202_clade;g__norank_c__SAR202_clade;s__uncultured_deep-sea_bacterium_g__norank_c__SAR202_clade
OTU1147	0	0	1	1	0	0	1	1	0	0	0	d__Bacteria;k__norank;p__Planctomycetes;c__OM190;o__norank_c__OM190;f__norank_c__OM190;g__norank_c__OM190;s__marine_metagenome_g__norank_c__OM190
OTU1148	0	0	1	1	0	0	1	1	0	0	0	d__Bacteria;k__norank;p__Proteobacteria;c__Deltaproteobacteria;o__Bradymonadales;f__norank_o__Bradymonadales;g__norank_o__Bradymonadales;s__uncultured_deep-sea_bacterium_g__norank_o__Bradymonadales
OTU1149	0	0	0	1	0	0	0	1	0	0	0	d__Bacteria;k__norank;p__Proteobacteria;c__Alphaproteobacteria;o__Rhodospirillales;f__Rhodospirillaceae;g__norank_f__Rhodospirillaceae;s__unclassified_g__norank_f__Rhodospirillaceae
OTU1150	0	1	1	1	0	1	1	1	0	0	0	d__Bacteria;k__norank;p__Proteobacteria;c__Alphaproteobacteria;o__Rhodospirillales;f__Rhodospirillaceae;g__AEGEAN-169_marine_group;s__unclassified_g__AEGEAN-169_marine_group
OTU1151	0	0	0	1	0	0	0	1	0	0	0	d__Bacteria;k__norank;p__Proteobacteria;c__Deltaproteobacteria;o__SAR324_clade_Marine_group_B_;f__norank_o__SAR324_clade_Marine_group_B_;g__norank_o__SAR324_clade_Marine_group_B_;s__uncultured_bacterium_HF0200_14D13
OTU1152	0	0	0	0	0	0	0	1	0	0	0	d__Bacteria;k__norank;p__Gracilibacteria;c__norank_p__Gracilibacteria;o__norank_p__Gracilibacteria;f__norank_p__Gracilibacteria;g__norank_p__Gracilibacteria;s__uncultured_bacterium_g__norank_p__Gracilibacteria
OTU1153	0	0	1	1	0	0	1	1	0	0	0	d__Bacteria;k__norank;p__Marinimicrobia__SAR406_clade_;c__norank_p__Marinimicrobia__SAR406_clade_;o__norank_p__Marinimicrobia__SAR406_clade_;f__norank_p__Marinimicrobia__SAR406_clade_;g__norank_p__Marinimicrobia__SAR406_clade_;s__unclassified_g__norank_p__Marinimicrobia__SAR406_clade_
OTU1154	0	0	0	1	1	0	0	1	1	1	1	d__Bacteria;k__norank;p__Cyanobacteria;c__Cyanobacteria;o__norank_c__Cyanobacteria;f__norank_c__Cyanobacteria;g__norank_c__Cyanobacteria;s__unclassified_g__norank_c__Cyanobacteria
OTU1155	0	0	0	1	0	0	0	1	0	0	0	d__Bacteria;k__norank;p__Proteobacteria;c__Gammaproteobacteria;o__Xanthomonadales;f__norank_o__Xanthomonadales;g__norank_o__Xanthomonadales;s__unclassified_g__norank_o__Xanthomonadales
OTU1156	0	0	1	1	0	0	1	1	0	0	0	d__Bacteria;k__norank;p__Verrucomicrobia;c__Arctic97B-4_marine_group;o__norank_c__Arctic97B-4_marine_group;f__norank_c__Arctic97B-4_marine_group;g__norank_c__Arctic97B-4_marine_group;s__uncultured_verrucomicrobium_HF0500_16O23
OTU1157	0	0	1	1	0	0	1	1	0	0	0	d__Bacteria;k__norank;p__Proteobacteria;c__Alphaproteobacteria;o__Rickettsiales;f__S25-593;g__norank_f__S25-593;s__uncultured_Rickettsiales_bacterium_g__norank_f__S25-593
OTU1158	1	1	1	0	0	0	1	1	1	1	1	d__Bacteria;k__norank;p__Proteobacteria;c__Alphaproteobacteria;o__Rhodobacterales;f__Rhodobacteraceae;g__Ascidiaceihabitans;s__unclassified_g__Ascidiaceihabitans
OTU1159	0	0	0	0	1	0	0	1	0	0	0	d__Bacteria;k__norank;p__Proteobacteria;c__Alphaproteobacteria;o__Rhizobiales;f__Rhodobiaceae;g__norank_f__Rhodobiaceae;s__Tepidicaulis_marinus
OTU1160	0	0	0	1	0	0	0	1	0	0	0	d__Bacteria;k__norank;p__Planctomycetes;c__unclassified_p__Planctomycetes;o__unclassified_p__Planctomycetes;f__unclassified_p__Planctomycetes;g__unclassified_p__Planctomycetes;s__unclassified_p__Planctomycetes
OTU1161	0	0	1	1	0	0	1	1	0	0	0	d__Bacteria;k__norank;p__Chloroflexi;c__SAR202_clade;o__norank_c__SAR202_clade;f__norank_c__SAR202_clade;g__norank_c__SAR202_clade;s__SAR202_cluster_bacterium_SCGC_AAA240-N13
OTU1162	0	0	0	0	0	0	0	1	0	0	0	d__Bacteria;k__norank;p__Proteobacteria;c__Gammaproteobacteria;o__unclassified_c__Gammaproteobacteria;f__unclassified_c__Gammaproteobacteria;g__unclassified_c__Gammaproteobacteria;s__unclassified_c__Gammaproteobacteria
OTU1163	0	0	0	0	0	0	0	1	0	0	0	d__Bacteria;k__norank;p__Chloroflexi;c__SAR202_clade;o__norank_c__SAR202_clade;f__norank_c__SAR202_clade;g__norank_c__SAR202_clade;s__unclassified_g__norank_c__SAR202_clade
OTU1164	0	0	1	1	0	0	1	1	0	0	0	d__Bacteria;k__norank;p__Marinimicrobia__SAR406_clade_;c__norank_p__Marinimicrobia__SAR406_clade_;o__norank_p__Marinimicrobia__SAR406_clade_;f__norank_p__Marinimicrobia__SAR406_clade_;g__norank_p__Marinimicrobia__SAR406_clade_;s__Marinimicrobia_bacterium_SCGC_AAA003-L08
OTU1165	0	1	1	1	0	1	1	1	0	0	0	d__Bacteria;k__norank;p__Proteobacteria;c__Alphaproteobacteria;o__Rhodospirillales;f__Rhodospirillaceae;g__AEGEAN-169_marine_group;s__uncultured_bacterium_g__AEGEAN-169_marine_group
OTU1166	1	0	0	0	0	0	0	1	0	0	1	d__Bacteria;k__norank;p__Bacteroidetes;c__Sphingobacteriia;o__Sphingobacteriales;f__Saprospiraceae;g__norank_f__Saprospiraceae;s__unclassified_g__norank_f__Saprospiraceae
OTU1167	1	0	0	0	1	0	1	1	0	1	1	d__Bacteria;k__norank;p__Proteobacteria;c__Alphaproteobacteria;o__Caulobacterales;f__Hyphomonadaceae;g__Maricaulis;s__Maricaulis_virginensis
OTU1168	0	0	0	0	0	0	0	1	0	0	0	d__Bacteria;k__norank;p__Firmicutes;c__Clostridia;o__Clostridiales;f__Family_XI_o__Clostridiales;g__Anaerococcus;s__uncultured_Anaerococcus_sp.
OTU1169	0	0	1	1	0	0	1	1	0	0	0	d__Bacteria;k__norank;p__Acidobacteria;c__Acidobacteria;o__norank_c__Acidobacteria;f__norank_c__Acidobacteria;g__norank_c__Acidobacteria;s__uncultured_hydrocarbon_seep_bacterium_BPC102
OTU1170	0	0	1	1	0	0	1	1	0	0	0	d__Bacteria;k__norank;p__Proteobacteria;c__Gammaproteobacteria;o__Oceanospirillales;f__SAR86_clade;g__norank_f__SAR86_clade;s__unclassified_g__norank_f__SAR86_clade
OTU1171	1	0	0	0	1	0	0	1	1	1	1	d__Bacteria;k__norank;p__Proteobacteria;c__Deltaproteobacteria;o__Bdellovibrionales;f__Bacteriovoracaceae;g__norank_f__Bacteriovoracaceae;s__uncultured_deep-sea_bacterium_g__norank_f__Bacteriovoracaceae
OTU1172	0	0	0	0	0	0	0	1	0	0	0	d__Bacteria;k__norank;p__Proteobacteria;c__Deltaproteobacteria;o__NB1-j;f__norank_o__NB1-j;g__norank_o__NB1-j;s__uncultured_bacterium_W4-39b
OTU1173	0	0	0	1	0	0	1	1	0	0	0	d__Bacteria;k__norank;p__Planctomycetes;c__OM190;o__norank_c__OM190;f__norank_c__OM190;g__norank_c__OM190;s__uncultured_bacterium_g__norank_c__OM190
OTU1174	1	0	1	1	1	1	1	1	1	1	1	d__Bacteria;k__norank;p__Proteobacteria;c__Gammaproteobacteria;o__Alteromonadales;f__Alteromonadaceae;g__Marinobacter;s__Marinobacter_gudaonensis
OTU1175	0	1	1	1	1	1	1	1	0	0	0	d__Bacteria;k__norank;p__Planctomycetes;c__OM190;o__norank_c__OM190;f__norank_c__OM190;g__norank_c__OM190;s__uncultured_Planctomycetaceae_bacterium_g__norank_c__OM190
OTU1176	1	0	0	0	0	0	1	1	0	0	0	d__Bacteria;k__norank;p__Proteobacteria;c__Alphaproteobacteria;o__unclassified_c__Alphaproteobacteria;f__unclassified_c__Alphaproteobacteria;g__unclassified_c__Alphaproteobacteria;s__unclassified_c__Alphaproteobacteria
OTU1177	0	1	1	1	0	0	0	1	0	0	0	d__Bacteria;k__norank;p__Firmicutes;c__Bacilli;o__Bacillales;f__Bacillaceae;g__Bacillus;s__Bacillus_niabensis
OTU1178	0	0	1	1	0	0	1	1	0	0	0	d__Bacteria;k__norank;p__Proteobacteria;c__Deltaproteobacteria;o__NB1-j;f__norank_o__NB1-j;g__norank_o__NB1-j;s__unclassified_g__norank_o__NB1-j
OTU1179	1	1	1	1	1	1	1	1	1	1	1	d__Bacteria;k__norank;p__Proteobacteria;c__Alphaproteobacteria;o__Sphingomonadales;f__Sphingomonadaceae;g__Sphingomonas;s__Sphingomonas_melonis_g__Sphingomonas
OTU1180	0	0	0	0	0	0	0	1	0	0	0	d__Bacteria;k__norank;p__SR1__Absconditabacteria_;c__norank_p__SR1__Absconditabacteria_;o__norank_p__SR1__Absconditabacteria_;f__norank_p__SR1__Absconditabacteria_;g__norank_p__SR1__Absconditabacteria_;s__SR1_bacterium_oral_taxon_875
OTU1181	0	0	1	0	0	0	1	1	0	0	0	d__Bacteria;k__norank;p__Proteobacteria;c__Alphaproteobacteria;o__Rhodospirillales;f__Rhodospirillaceae;g__norank_f__Rhodospirillaceae;s__unclassified_g__norank_f__Rhodospirillaceae
OTU1182	0	0	1	0	0	1	1	1	0	0	0	d__Bacteria;k__norank;p__Proteobacteria;c__Gammaproteobacteria;o__unclassified_c__Gammaproteobacteria;f__unclassified_c__Gammaproteobacteria;g__unclassified_c__Gammaproteobacteria;s__unclassified_c__Gammaproteobacteria
OTU1183	0	0	0	1	0	0	0	1	0	0	0	d__Bacteria;k__norank;p__Firmicutes;c__Clostridia;o__Clostridiales;f__Family_XI_o__Clostridiales;g__Anaerococcus;s__Anaerococcus_prevotii_g__Anaerococcus
OTU1184	0	0	0	1	0	0	1	1	0	0	0	d__Bacteria;k__norank;p__Proteobacteria;c__Deltaproteobacteria;o__SAR324_clade_Marine_group_B_;f__norank_o__SAR324_clade_Marine_group_B_;g__norank_o__SAR324_clade_Marine_group_B_;s__uncultured_bacterium_HF0500_03A04
OTU1185	0	0	1	0	0	0	0	1	0	0	0	d__Bacteria;k__norank;p__Proteobacteria;c__Deltaproteobacteria;o__Bradymonadales;f__norank_o__Bradymonadales;g__norank_o__Bradymonadales;s__uncultured_Geobacteraceae_bacterium_g__norank
OTU1186	0	0	1	1	0	0	1	1	0	0	0	d__Bacteria;k__norank;p__Proteobacteria;c__Deltaproteobacteria;o__unclassified_c__Deltaproteobacteria;f__unclassified_c__Deltaproteobacteria;g__unclassified_c__Deltaproteobacteria;s__unclassified_c__Deltaproteobacteria
OTU1187	1	0	0	0	0	0	0	1	0	0	0	d__Bacteria;k__norank;p__Proteobacteria;c__Deltaproteobacteria;o__Bdellovibrionales;f__Bdellovibrionaceae;g__OM27_clade;s__unclassified_g__OM27_clade
OTU1188	0	0	0	0	0	0	0	1	0	0	0	d__Bacteria;k__norank;p__Proteobacteria;c__Gammaproteobacteria;o__Pseudomonadales;f__Moraxellaceae;g__Moraxella;s__unclassified_g__Moraxella
OTU1189	0	0	0	0	0	0	0	1	0	0	0	d__Bacteria;k__norank;p__Proteobacteria;c__Deltaproteobacteria;o__Oligoflexales;f__Oligoflexaceae;g__norank_f__Oligoflexaceae;s__unclassified_g__norank_f__Oligoflexaceae
OTU1190	0	0	1	0	0	0	1	1	0	0	0	d__Bacteria;k__norank;p__Chloroflexi;c__SAR202_clade;o__norank_c__SAR202_clade;f__norank_c__SAR202_clade;g__norank_c__SAR202_clade;s__uncultured_bacterium_g__norank_c__SAR202_clade
OTU1191	0	0	1	1	0	0	1	1	0	0	0	d__Bacteria;k__norank;p__Proteobacteria;c__Deltaproteobacteria;o__Bdellovibrionales;f__Bdellovibrionaceae;g__OM27_clade;s__uncultured_bacterium_AD243-H1
OTU1192	0	0	0	1	0	0	0	1	0	0	0	d__Bacteria;k__norank;p__Marinimicrobia__SAR406_clade_;c__norank_p__Marinimicrobia__SAR406_clade_;o__norank_p__Marinimicrobia__SAR406_clade_;f__norank_p__Marinimicrobia__SAR406_clade_;g__norank_p__Marinimicrobia__SAR406_clade_;s__unclassified_g__norank_p__Marinimicrobia__SAR406_clade_
OTU1193	0	0	0	1	0	0	0	1	0	0	0	d__Bacteria;k__norank;p__Firmicutes;c__Clostridia;o__Clostridiales;f__Family_XI_o__Clostridiales;g__Anaerococcus;s__unclassified_g__Anaerococcus
OTU1194	0	0	0	1	0	0	1	1	0	0	0	d__Bacteria;k__norank;p__Proteobacteria;c__Deltaproteobacteria;o__Bdellovibrionales;f__Bdellovibrionaceae;g__OM27_clade;s__unclassified_g__OM27_clade
OTU1195	0	0	1	1	0	0	1	1	0	0	0	d__Bacteria;k__norank;p__Proteobacteria;c__Deltaproteobacteria;o__Bdellovibrionales;f__Bdellovibrionaceae;g__OM27_clade;s__uncultured_delta_proteobacterium_g__OM27_clade
OTU1196	0	0	1	1	0	0	1	1	0	0	0	d__Bacteria;k__norank;p__Gemmatimonadetes;c__Gemmatimonadetes;o__norank_c__Gemmatimonadetes;f__norank_c__Gemmatimonadetes;g__norank_c__Gemmatimonadetes;s__uncultured_bacterium_g__norank_c__Gemmatimonadetes
OTU1197	1	0	0	0	0	0	0	1	1	1	0	d__Bacteria;k__norank;p__Proteobacteria;c__Gammaproteobacteria;o__KI89A_clade;f__norank_o__KI89A_clade;g__norank_o__KI89A_clade;s__unclassified_g__norank_o__KI89A_clade
OTU1198	0	0	0	1	0	0	0	1	0	0	0	d__Bacteria;k__norank;p__Chloroflexi;c__SAR202_clade;o__norank_c__SAR202_clade;f__norank_c__SAR202_clade;g__norank_c__SAR202_clade;s__unclassified_g__norank_c__SAR202_clade
OTU1199	0	0	1	1	0	0	1	1	0	0	0	d__Bacteria;k__norank;p__Nitrospinae;c__MD2898-B26;o__norank_c__MD2898-B26;f__norank_c__MD2898-B26;g__norank_c__MD2898-B26;s__uncultured_bacterium_g__norank_c__MD2898-B26
OTU1200	0	0	0	1	0	0	0	1	0	0	0	d__Bacteria;k__norank;p__Proteobacteria;c__Betaproteobacteria;o__Neisseriales;f__Neisseriaceae;g__Neisseria;s__uncultured_bacterium_g__Neisseria
OTU1201	0	0	0	0	0	0	0	1	1	1	1	d__Bacteria;k__norank;p__Proteobacteria;c__Gammaproteobacteria;o__Enterobacteriales;f__Enterobacteriaceae;g__Escherichia-Shigella;s__unclassified_g__Escherichia-Shigella
OTU1202	0	0	1	1	0	0	1	1	0	0	0	d__Bacteria;k__norank;p__Proteobacteria;c__Gammaproteobacteria;o__E01-9C-26_marine_group;f__norank_o__E01-9C-26_marine_group;g__norank_o__E01-9C-26_marine_group;s__uncultured_marine_microorganism_g__norank_o__E01-9C-26_marine_group
OTU1203	1	0	0	0	1	0	0	1	1	1	1	d__Bacteria;k__norank;p__Proteobacteria;c__Gammaproteobacteria;o__Legionellales;f__Legionellaceae;g__norank_f__Legionellaceae;s__uncultured_gamma_proteobacterium_g__norank_f__Legionellaceae
OTU1204	0	0	1	1	0	0	1	1	0	0	0	d__Bacteria;k__norank;p__Proteobacteria;c__Deltaproteobacteria;o__NB1-j;f__norank_o__NB1-j;g__norank_o__NB1-j;s__uncultured_bacterium_g__norank_o__NB1-j
OTU1205	0	0	1	1	0	0	1	1	0	0	0	d__Bacteria;k__norank;p__Proteobacteria;c__Gammaproteobacteria;o__unclassified_c__Gammaproteobacteria;f__unclassified_c__Gammaproteobacteria;g__unclassified_c__Gammaproteobacteria;s__unclassified_c__Gammaproteobacteria
OTU1206	0	0	0	0	0	0	0	1	0	0	0	d__Bacteria;k__norank;p__Firmicutes;c__Clostridia;o__Clostridiales;f__Family_XI_o__Clostridiales;g__Anaerococcus;s__Anaerococcus_sp._PH9
OTU1207	0	0	0	1	0	0	1	1	0	0	0	d__Bacteria;k__norank;p__Proteobacteria;c__unclassified_p__Proteobacteria;o__unclassified_p__Proteobacteria;f__unclassified_p__Proteobacteria;g__unclassified_p__Proteobacteria;s__unclassified_p__Proteobacteria
OTU1208	0	0	0	1	0	0	1	1	0	0	0	d__Bacteria;k__norank;p__Proteobacteria;c__Deltaproteobacteria;o__NB1-j;f__norank_o__NB1-j;g__norank_o__NB1-j;s__unclassified_g__norank_o__NB1-j
OTU1209	0	0	0	0	0	0	0	1	0	0	0	d__Bacteria;k__norank;p__Proteobacteria;c__Deltaproteobacteria;o__Bdellovibrionales;f__Bdellovibrionaceae;g__OM27_clade;s__unclassified_g__OM27_clade
OTU1210	0	0	1	0	0	0	1	1	0	0	0	d__Bacteria;k__norank;p__Proteobacteria;c__Gammaproteobacteria;o__Oceanospirillales;f__SAR86_clade;g__norank_f__SAR86_clade;s__unclassified_g__norank_f__SAR86_clade
OTU1211	0	0	1	1	0	0	1	1	0	0	0	d__Bacteria;k__norank;p__Marinimicrobia__SAR406_clade_;c__norank_p__Marinimicrobia__SAR406_clade_;o__norank_p__Marinimicrobia__SAR406_clade_;f__norank_p__Marinimicrobia__SAR406_clade_;g__norank_p__Marinimicrobia__SAR406_clade_;s__uncultured_bacterium_g__norank_p__Marinimicrobia__SAR406_clade_
OTU1212	0	0	0	1	0	0	0	1	0	0	0	d__Bacteria;k__norank;p__Acidobacteria;c__Acidobacteria;o__norank_c__Acidobacteria;f__norank_c__Acidobacteria;g__norank_c__Acidobacteria;s__unclassified_g__norank_c__Acidobacteria
OTU1213	0	0	1	1	0	0	1	1	0	0	0	d__Bacteria;k__norank;p__Acidobacteria;c__Acidobacteria;o__norank_c__Acidobacteria;f__norank_c__Acidobacteria;g__norank_c__Acidobacteria;s__uncultured_bacterium_KM3-187-G1
OTU1214	0	0	0	0	1	0	0	1	1	0	1	d__Bacteria;k__norank;p__Proteobacteria;c__Gammaproteobacteria;o__unclassified_c__Gammaproteobacteria;f__unclassified_c__Gammaproteobacteria;g__unclassified_c__Gammaproteobacteria;s__unclassified_c__Gammaproteobacteria
OTU1215	0	1	0	1	0	1	1	1	0	0	0	d__Bacteria;k__norank;p__Proteobacteria;c__Alphaproteobacteria;o__Rhizobiales;f__Aurantimonadaceae;g__Aurantimonas;s__Aurantimonas_coralicida
OTU1216	0	0	0	0	0	0	1	1	0	0	0	d__Bacteria;k__norank;p__Proteobacteria;c__Deltaproteobacteria;o__Oligoflexales;f__Oligoflexaceae;g__norank_f__Oligoflexaceae;s__unclassified_g__norank_f__Oligoflexaceae
OTU1217	0	0	1	0	0	0	1	1	0	0	0	d__Bacteria;k__norank;p__Actinobacteria;c__Actinobacteria;o__Gaiellales;f__norank_o__Gaiellales;g__norank_o__Gaiellales;s__uncultured_bacterium_g__norank_o__Gaiellales
OTU1218	0	0	0	0	0	0	0	1	0	0	0	d__Bacteria;k__norank;p__Planctomycetes;c__Pla4_lineage;o__norank_c__Pla4_lineage;f__norank_c__Pla4_lineage;g__norank_c__Pla4_lineage;s__uncultured_planctomycete_g__norank_c__Pla4_lineage
OTU1219	0	0	1	1	0	0	1	1	0	0	0	d__Bacteria;k__norank;p__Chloroflexi;c__unclassified_p__Chloroflexi;o__unclassified_p__Chloroflexi;f__unclassified_p__Chloroflexi;g__unclassified_p__Chloroflexi;s__unclassified_p__Chloroflexi
OTU1220	1	1	1	1	1	1	1	1	1	0	1	d__Bacteria;k__norank;p__Proteobacteria;c__Gammaproteobacteria;o__Vibrionales;f__Vibrionaceae;g__Photobacterium;s__Photobacterium_angustum
OTU1221	0	1	0	0	0	1	1	1	1	1	0	d__Bacteria;k__norank;p__Proteobacteria;c__Deltaproteobacteria;o__Bdellovibrionales;f__Bdellovibrionaceae;g__OM27_clade;s__uncultured_delta_proteobacterium_g__OM27_clade
OTU1222	0	0	1	1	0	1	1	1	0	0	0	d__Bacteria;k__norank;p__Proteobacteria;c__Alphaproteobacteria;o__Rhodospirillales;f__Rhodospirillaceae;g__AEGEAN-169_marine_group;s__uncultured_alpha_proteobacterium_g__AEGEAN-169_marine_group
OTU1223	0	0	0	1	1	0	1	1	1	1	1	d__Bacteria;k__norank;p__Actinobacteria;c__Actinobacteria;o__Propionibacteriales;f__Nocardioidaceae;g__Aeromicrobium;s__uncultured_bacterium_g__Aeromicrobium
OTU1224	0	0	0	0	0	0	0	1	0	0	0	d__Bacteria;k__norank;p__unclassified_k__norank;c__unclassified_k__norank;o__unclassified_k__norank;f__unclassified_k__norank;g__unclassified_k__norank;s__unclassified_k__norank
OTU1225	1	1	1	1	1	1	1	1	1	1	1	d__Bacteria;k__norank;p__Proteobacteria;c__Alphaproteobacteria;o__SAR11_clade;f__Deep_1;g__norank_f__Deep_1;s__unclassified_g__norank_f__Deep_1
OTU1226	0	0	1	1	1	0	0	1	1	0	0	d__Bacteria;k__norank;p__Proteobacteria;c__Betaproteobacteria;o__Burkholderiales;f__Burkholderiaceae;g__Burkholderia-Paraburkholderia;s__Paraburkholderia_caledonica
OTU1227	0	0	0	0	0	0	0	1	0	1	0	d__Bacteria;k__norank;p__Bacteroidetes;c__Flavobacteriia;o__Flavobacteriales;f__Cryomorphaceae;g__norank_f__Cryomorphaceae;s__unclassified_g__norank_f__Cryomorphaceae
OTU1228	0	0	0	0	0	0	0	1	0	0	0	d__Bacteria;k__norank;p__Chloroflexi;c__Anaerolineae;o__Anaerolineales;f__Anaerolineaceae;g__norank_f__Anaerolineaceae;s__unclassified_g__norank_f__Anaerolineaceae
OTU1229	0	0	1	1	0	1	1	1	0	0	0	d__Bacteria;k__norank;p__Proteobacteria;c__Alphaproteobacteria;o__Rhodospirillales;f__AT-s3-44;g__norank_f__AT-s3-44;s__uncultured_bacterium_g__norank_f__AT-s3-44
OTU1230	0	0	0	0	0	0	0	1	0	0	0	d__Bacteria;k__norank;p__Proteobacteria;c__Gammaproteobacteria;o__Thiotrichales;f__Thiotrichales_Incertae_Sedis;g__Caedibacter;s__uncultured_bacterium_g__Caedibacter
OTU1231	0	0	1	1	0	0	1	1	0	0	0	d__Bacteria;k__norank;p__Actinobacteria;c__Actinobacteria;o__Acidimicrobiales;f__unclassified_o__Acidimicrobiales;g__unclassified_o__Acidimicrobiales;s__unclassified_o__Acidimicrobiales
OTU1232	0	0	1	1	0	0	1	1	0	0	0	d__Bacteria;k__norank;p__Planctomycetes;c__OM190;o__norank_c__OM190;f__norank_c__OM190;g__norank_c__OM190;s__uncultured_bacterium_g__norank_c__OM190
OTU1233	0	0	0	0	0	0	1	1	0	0	0	d__Bacteria;k__norank;p__Proteobacteria;c__Gammaproteobacteria;o__Oceanospirillales;f__Oceanospirillaceae;g__Litoribacillus;s__uncultured_gamma_proteobacterium_g__Litoribacillus
OTU1234	0	0	1	0	0	0	1	1	0	0	0	d__Bacteria;k__norank;p__Proteobacteria;c__Alphaproteobacteria;o__Rhodospirillales;f__unclassified_o__Rhodospirillales;g__unclassified_o__Rhodospirillales;s__unclassified_o__Rhodospirillales
OTU1235	0	0	1	1	0	0	1	1	0	0	0	d__Bacteria;k__norank;p__Proteobacteria;c__Deltaproteobacteria;o__NB1-j;f__norank_o__NB1-j;g__norank_o__NB1-j;s__uncultured_bacterium_g__norank_o__NB1-j
OTU1236	0	0	1	0	0	0	0	1	0	0	0	d__Bacteria;k__norank;p__Planctomycetes;c__BD7-11;o__norank_c__BD7-11;f__norank_c__BD7-11;g__norank_c__BD7-11;s__uncultured_planctomycete_g__norank_c__BD7-11
OTU1237	0	0	0	0	0	1	1	1	1	1	1	d__Bacteria;k__norank;p__Proteobacteria;c__Gammaproteobacteria;o__Thiotrichales;f__Piscirickettsiaceae;g__Methylophaga;s__Methylophaga_marina
OTU1238	0	0	1	1	0	1	1	1	0	0	0	d__Bacteria;k__norank;p__Verrucomicrobia;c__Opitutae;o__MB11C04_marine_group;f__norank_o__MB11C04_marine_group;g__norank_o__MB11C04_marine_group;s__uncultured_bacterium_g__norank_o__MB11C04_marine_group
OTU1239	0	0	1	1	0	0	1	1	0	0	0	d__Bacteria;k__norank;p__Proteobacteria;c__Alphaproteobacteria;o__Rhodospirillales;f__Rhodospirillaceae;g__norank_f__Rhodospirillaceae;s__unclassified_g__norank_f__Rhodospirillaceae
OTU1240	0	0	1	1	0	0	1	1	0	0	0	d__Bacteria;k__norank;p__Proteobacteria;c__Gammaproteobacteria;o__Oceanospirillales;f__SAR86_clade;g__norank_f__SAR86_clade;s__unclassified_g__norank_f__SAR86_clade
OTU1241	0	0	0	0	0	0	0	1	0	0	0	d__Bacteria;k__norank;p__Actinobacteria;c__Actinobacteria;o__Corynebacteriales;f__Corynebacteriaceae;g__Corynebacterium_1;s__Corynebacterium_imitans
OTU1242	0	0	1	1	0	0	1	1	0	0	0	d__Bacteria;k__norank;p__Chloroflexi;c__Anaerolineae;o__Anaerolineales;f__Anaerolineaceae;g__norank_f__Anaerolineaceae;s__marine_metagenome_g__norank_f__Anaerolineaceae
OTU1243	0	0	1	1	0	0	1	1	0	0	0	d__Bacteria;k__norank;p__Chloroflexi;c__SAR202_clade;o__norank_c__SAR202_clade;f__norank_c__SAR202_clade;g__norank_c__SAR202_clade;s__unclassified_g__norank_c__SAR202_clade
OTU1244	0	0	0	0	0	0	0	1	1	0	0	d__Bacteria;k__norank;p__Firmicutes;c__Clostridia;o__Clostridiales;f__Family_XI_o__Clostridiales;g__Finegoldia;s__unclassified_g__Finegoldia
OTU1245	0	0	0	0	1	0	1	1	0	1	1	d__Bacteria;k__norank;p__Proteobacteria;c__Gammaproteobacteria;o__unclassified_c__Gammaproteobacteria;f__unclassified_c__Gammaproteobacteria;g__unclassified_c__Gammaproteobacteria;s__unclassified_c__Gammaproteobacteria
OTU1246	0	0	0	0	0	0	0	1	0	0	0	d__Bacteria;k__norank;p__Proteobacteria;c__Gammaproteobacteria;o__Methylococcales;f__Milano-WF1B-03;g__norank_f__Milano-WF1B-03;s__uncultured_gamma_proteobacterium_g__norank_f__Milano-WF1B-03
OTU1247	0	0	1	0	0	0	1	1	0	0	0	d__Bacteria;k__norank;p__Chloroflexi;c__unclassified_p__Chloroflexi;o__unclassified_p__Chloroflexi;f__unclassified_p__Chloroflexi;g__unclassified_p__Chloroflexi;s__unclassified_p__Chloroflexi
OTU1248	1	0	0	0	0	1	1	1	1	1	1	d__Bacteria;k__norank;p__Proteobacteria;c__Gammaproteobacteria;o__Oceanospirillales;f__Alcanivoracaceae;g__Pleionea;s__unclassified_g__Pleionea
OTU1249	0	0	1	1	0	0	1	1	0	0	0	d__Bacteria;k__norank;p__Proteobacteria;c__Deltaproteobacteria;o__Oligoflexales;f__Oligoflexaceae;g__norank_f__Oligoflexaceae;s__marine_metagenome_g__norank_f__Oligoflexaceae
OTU1250	1	0	1	1	0	1	1	1	0	1	0	d__Bacteria;k__norank;p__Actinobacteria;c__Actinobacteria;o__Corynebacteriales;f__Nocardiaceae;g__Rhodococcus;s__unclassified_g__Rhodococcus
OTU1251	0	0	1	1	0	0	1	1	0	0	0	d__Bacteria;k__norank;p__Acidobacteria;c__Acidobacteria;o__norank_c__Acidobacteria;f__norank_c__Acidobacteria;g__norank_c__Acidobacteria;s__unclassified_g__norank_c__Acidobacteria
OTU1252	0	0	1	1	0	0	1	1	0	0	0	d__Bacteria;k__norank;p__Acidobacteria;c__Acidobacteria;o__norank_c__Acidobacteria;f__norank_c__Acidobacteria;g__norank_c__Acidobacteria;s__unclassified_g__norank_c__Acidobacteria
OTU1253	0	0	0	0	0	0	0	1	0	0	0	d__Bacteria;k__norank;p__Proteobacteria;c__Gammaproteobacteria;o__Legionellales;f__Coxiellaceae;g__Coxiella;s__unclassified_g__Coxiella
OTU1254	0	0	1	0	0	0	1	1	0	0	0	d__Bacteria;k__norank;p__Proteobacteria;c__Deltaproteobacteria;o__Bdellovibrionales;f__Bdellovibrionaceae;g__OM27_clade;s__uncultured_bacterium_g__OM27_clade
OTU1255	0	0	0	1	0	0	0	1	0	0	0	d__Bacteria;k__norank;p__Saccharibacteria;c__norank_p__Saccharibacteria;o__norank_p__Saccharibacteria;f__norank_p__Saccharibacteria;g__norank_p__Saccharibacteria;s__unclassified_g__norank_p__Saccharibacteria
OTU1256	0	0	0	1	0	0	0	1	0	0	0	d__Bacteria;k__norank;p__Planctomycetes;c__OM190;o__norank_c__OM190;f__norank_c__OM190;g__norank_c__OM190;s__uncultured_deep-sea_bacterium_g__norank_c__OM190
OTU1257	0	0	1	1	1	1	1	1	1	1	0	d__Bacteria;k__norank;p__Proteobacteria;c__Alphaproteobacteria;o__Rhodospirillales;f__Rhodospirillaceae;g__Thalassospira;s__uncultured_bacterium_g__Thalassospira
OTU1258	0	0	1	0	0	0	1	1	0	0	0	d__Bacteria;k__norank;p__Marinimicrobia__SAR406_clade_;c__norank_p__Marinimicrobia__SAR406_clade_;o__norank_p__Marinimicrobia__SAR406_clade_;f__norank_p__Marinimicrobia__SAR406_clade_;g__norank_p__Marinimicrobia__SAR406_clade_;s__unclassified_g__norank_p__Marinimicrobia__SAR406_clade_
OTU1259	0	0	0	1	0	0	0	1	0	0	0	d__Bacteria;k__norank;p__Nitrospinae;c__Nitrospinia;o__Nitrospinales;f__Nitrospinaceae;g__Nitrospina;s__unclassified_g__Nitrospina
OTU1260	0	0	1	1	0	0	1	1	0	0	0	d__Bacteria;k__norank;p__Proteobacteria;c__Deltaproteobacteria;o__Myxococcales;f__P3OB-42;g__norank_f__P3OB-42;s__unclassified_g__norank_f__P3OB-42
OTU1261	0	0	0	0	0	0	1	1	0	0	0	d__Bacteria;k__norank;p__Bacteroidetes;c__Sphingobacteriia;o__Sphingobacteriales;f__unclassified_o__Sphingobacteriales;g__unclassified_o__Sphingobacteriales;s__unclassified_o__Sphingobacteriales
OTU1262	0	0	1	1	0	0	1	1	0	0	0	d__Bacteria;k__norank;p__Marinimicrobia__SAR406_clade_;c__norank_p__Marinimicrobia__SAR406_clade_;o__norank_p__Marinimicrobia__SAR406_clade_;f__norank_p__Marinimicrobia__SAR406_clade_;g__norank_p__Marinimicrobia__SAR406_clade_;s__Marinimicrobia_bacterium_SCGC_AAA003-L08
OTU1263	0	0	1	1	0	0	0	1	0	0	0	d__Bacteria;k__norank;p__Acidobacteria;c__Acidobacteria;o__norank_c__Acidobacteria;f__norank_c__Acidobacteria;g__norank_c__Acidobacteria;s__uncultured_Saccharibacillus_sp.
OTU1264	0	0	0	1	0	0	1	1	0	0	0	d__Bacteria;k__norank;p__unclassified_k__norank;c__unclassified_k__norank;o__unclassified_k__norank;f__unclassified_k__norank;g__unclassified_k__norank;s__unclassified_k__norank
OTU1265	0	0	0	0	0	0	1	1	0	0	0	d__Bacteria;k__norank;p__Verrucomicrobia;c__Arctic97B-4_marine_group;o__norank_c__Arctic97B-4_marine_group;f__norank_c__Arctic97B-4_marine_group;g__norank_c__Arctic97B-4_marine_group;s__unclassified_g__norank_c__Arctic97B-4_marine_group
OTU1266	0	0	0	0	0	0	0	1	0	0	0	d__Bacteria;k__norank;p__Cyanobacteria;c__Cyanobacteria;o__norank_c__Cyanobacteria;f__norank_c__Cyanobacteria;g__norank_c__Cyanobacteria;s__unclassified_g__norank_c__Cyanobacteria
OTU1267	0	0	1	1	0	0	1	1	0	0	0	d__Bacteria;k__norank;p__Marinimicrobia__SAR406_clade_;c__norank_p__Marinimicrobia__SAR406_clade_;o__norank_p__Marinimicrobia__SAR406_clade_;f__norank_p__Marinimicrobia__SAR406_clade_;g__norank_p__Marinimicrobia__SAR406_clade_;s__Marinimicrobia_bacterium_SCGC_AAA003-L08
OTU1268	0	0	1	1	0	0	1	1	0	0	0	d__Bacteria;k__norank;p__Chloroflexi;c__SAR202_clade;o__norank_c__SAR202_clade;f__norank_c__SAR202_clade;g__norank_c__SAR202_clade;s__uncultured_bacterium_g__norank_c__SAR202_clade
OTU1269	0	1	1	1	0	1	1	1	0	1	0	d__Bacteria;k__norank;p__Marinimicrobia__SAR406_clade_;c__norank_p__Marinimicrobia__SAR406_clade_;o__norank_p__Marinimicrobia__SAR406_clade_;f__norank_p__Marinimicrobia__SAR406_clade_;g__norank_p__Marinimicrobia__SAR406_clade_;s__uncultured_marine_microorganism_g__norank_p__Marinimicrobia__SAR406_clade_
OTU1270	0	0	0	0	0	0	0	1	0	0	0	d__Bacteria;k__norank;p__Bacteroidetes;c__Sphingobacteriia;o__Sphingobacteriales;f__Lentimicrobiaceae;g__norank_f__Lentimicrobiaceae;s__uncultured_deep-sea_bacterium_g__norank_f__Lentimicrobiaceae
OTU1271	0	0	1	1	0	0	1	1	0	0	0	d__Bacteria;k__norank;p__Chloroflexi;c__SAR202_clade;o__norank_c__SAR202_clade;f__norank_c__SAR202_clade;g__norank_c__SAR202_clade;s__uncultured_deep-sea_bacterium_g__norank_c__SAR202_clade
OTU1272	0	0	1	1	0	0	1	1	0	0	0	d__Bacteria;k__norank;p__Proteobacteria;c__Gammaproteobacteria;o__Oceanospirillales;f__OM182_clade;g__norank_f__OM182_clade;s__unclassified_g__norank_f__OM182_clade
OTU1273	0	0	0	1	0	0	0	1	0	0	0	d__Bacteria;k__norank;p__Chloroflexi;c__SAR202_clade;o__norank_c__SAR202_clade;f__norank_c__SAR202_clade;g__norank_c__SAR202_clade;s__uncultured_Thermomicrobium_sp._g__norank
OTU1274	0	0	1	1	0	0	1	1	0	0	0	d__Bacteria;k__norank;p__Acidobacteria;c__Acidobacteria;o__norank_c__Acidobacteria;f__norank_c__Acidobacteria;g__norank_c__Acidobacteria;s__unclassified_g__norank_c__Acidobacteria
OTU1275	1	1	1	1	1	1	1	1	0	1	1	d__Bacteria;k__norank;p__Proteobacteria;c__Alphaproteobacteria;o__SAR11_clade;f__Deep_1;g__norank_f__Deep_1;s__unclassified_g__norank_f__Deep_1
OTU1276	0	0	0	0	0	0	1	1	0	0	0	d__Bacteria;k__norank;p__Verrucomicrobia;c__WCHB1-41;o__norank_c__WCHB1-41;f__norank_c__WCHB1-41;g__norank_c__WCHB1-41;s__uncultured_Verrucomicrobia_bacterium_g__norank_c__WCHB1-41
OTU1277	1	0	1	0	0	0	0	1	0	1	0	d__Bacteria;k__norank;p__Proteobacteria;c__Alphaproteobacteria;o__Rickettsiales;f__LWSR-14;g__norank_f__LWSR-14;s__Sinorickettsia_chlamys
OTU1278	0	0	0	1	0	0	1	1	0	0	0	d__Bacteria;k__norank;p__Gemmatimonadetes;c__Gemmatimonadetes;o__norank_c__Gemmatimonadetes;f__norank_c__Gemmatimonadetes;g__norank_c__Gemmatimonadetes;s__uncultured_deep-sea_bacterium_g__norank_c__Gemmatimonadetes
OTU1279	1	0	0	1	0	0	1	1	0	0	1	d__Bacteria;k__norank;p__Proteobacteria;c__Deltaproteobacteria;o__Bdellovibrionales;f__Bacteriovoracaceae;g__Halobacteriovorax;s__unclassified_g__Halobacteriovorax
OTU1280	0	0	0	1	0	0	0	1	1	0	0	d__Bacteria;k__norank;p__Proteobacteria;c__Alphaproteobacteria;o__Rhizobiales;f__Methylobacteriaceae;g__Methylobacterium;s__unclassified_g__Methylobacterium
OTU1281	0	0	1	1	0	0	1	1	0	0	0	d__Bacteria;k__norank;p__Proteobacteria;c__Deltaproteobacteria;o__SAR324_clade_Marine_group_B_;f__norank_o__SAR324_clade_Marine_group_B_;g__norank_o__SAR324_clade_Marine_group_B_;s__uncultured_bacterium_HF0770_45N15
OTU1282	0	0	0	0	0	0	1	1	0	0	0	d__Bacteria;k__norank;p__Proteobacteria;c__Deltaproteobacteria;o__Bradymonadales;f__norank_o__Bradymonadales;g__norank_o__Bradymonadales;s__unclassified_g__norank_o__Bradymonadales
OTU1283	0	0	1	1	0	0	1	1	0	0	0	d__Bacteria;k__norank;p__Acidobacteria;c__Acidobacteria;o__norank_c__Acidobacteria;f__norank_c__Acidobacteria;g__norank_c__Acidobacteria;s__unclassified_g__norank_c__Acidobacteria
OTU1284	0	0	1	1	0	0	1	1	0	0	0	d__Bacteria;k__norank;p__Proteobacteria;c__Deltaproteobacteria;o__NB1-j;f__norank_o__NB1-j;g__norank_o__NB1-j;s__uncultured_deep-sea_bacterium_g__norank_o__NB1-j
OTU1285	0	0	1	1	0	0	1	1	0	0	0	d__Bacteria;k__norank;p__Planctomycetes;c__Pla3_lineage;o__norank_c__Pla3_lineage;f__norank_c__Pla3_lineage;g__norank_c__Pla3_lineage;s__unclassified_g__norank_c__Pla3_lineage
OTU1286	0	0	1	1	0	1	1	1	0	0	0	d__Bacteria;k__norank;p__Proteobacteria;c__Alphaproteobacteria;o__Rhodospirillales;f__Rhodospirillaceae;g__AEGEAN-169_marine_group;s__uncultured_bacterium_g__AEGEAN-169_marine_group
OTU1287	0	0	1	1	0	0	0	1	0	0	0	d__Bacteria;k__norank;p__Chloroflexi;c__SAR202_clade;o__norank_c__SAR202_clade;f__norank_c__SAR202_clade;g__norank_c__SAR202_clade;s__unclassified_g__norank_c__SAR202_clade
OTU1288	1	0	0	0	1	0	0	1	1	1	1	d__Bacteria;k__norank;p__Proteobacteria;c__Alphaproteobacteria;o__Rhizobiales;f__Rhodobiaceae;g__norank_f__Rhodobiaceae;s__uncultured_bacterium_g__norank_f__Rhodobiaceae
OTU1289	0	0	0	1	0	0	0	1	0	0	0	d__Bacteria;k__norank;p__Proteobacteria;c__Deltaproteobacteria;o__Bdellovibrionales;f__Bdellovibrionaceae;g__OM27_clade;s__unclassified_g__OM27_clade
OTU1290	0	0	1	0	0	0	1	1	0	0	0	d__Bacteria;k__norank;p__Proteobacteria;c__Alphaproteobacteria;o__Rickettsiales;f__S25-593;g__norank_f__S25-593;s__unclassified_g__norank_f__S25-593
OTU1291	0	0	0	1	0	0	0	1	0	0	0	d__Bacteria;k__norank;p__Gemmatimonadetes;c__Gemmatimonadetes;o__norank_c__Gemmatimonadetes;f__norank_c__Gemmatimonadetes;g__norank_c__Gemmatimonadetes;s__unclassified_g__norank_c__Gemmatimonadetes
OTU1292	0	0	0	0	0	0	0	1	0	0	0	d__Bacteria;k__norank;p__Tenericutes;c__Mollicutes;o__Mycoplasmatales;f__Mycoplasmataceae;g__Mycoplasma;s__uncultured_bacterium_g__Mycoplasma
OTU1293	0	1	1	1	1	1	1	1	1	1	1	d__Bacteria;k__norank;p__Actinobacteria;c__Actinobacteria;o__Propionibacteriales;f__Propionibacteriaceae;g__Propionibacterium;s__Propionibacterium_acnes_subsp._acnes_g__Propionibacterium
OTU1294	0	0	0	0	0	0	0	1	0	0	0	d__Bacteria;k__norank;p__Proteobacteria;c__Gammaproteobacteria;o__unclassified_c__Gammaproteobacteria;f__unclassified_c__Gammaproteobacteria;g__unclassified_c__Gammaproteobacteria;s__unclassified_c__Gammaproteobacteria
OTU1295	0	0	0	0	0	0	0	1	0	0	0	d__Bacteria;k__norank;p__Chloroflexi;c__SAR202_clade;o__norank_c__SAR202_clade;f__norank_c__SAR202_clade;g__norank_c__SAR202_clade;s__unclassified_g__norank_c__SAR202_clade
OTU1296	0	0	0	1	0	0	1	1	0	0	0	d__Bacteria;k__norank;p__Marinimicrobia__SAR406_clade_;c__norank_p__Marinimicrobia__SAR406_clade_;o__norank_p__Marinimicrobia__SAR406_clade_;f__norank_p__Marinimicrobia__SAR406_clade_;g__norank_p__Marinimicrobia__SAR406_clade_;s__uncultured_bacterium_g__norank_p__Marinimicrobia__SAR406_clade_
OTU1297	0	0	1	1	0	0	1	1	0	0	0	d__Bacteria;k__norank;p__Marinimicrobia__SAR406_clade_;c__norank_p__Marinimicrobia__SAR406_clade_;o__norank_p__Marinimicrobia__SAR406_clade_;f__norank_p__Marinimicrobia__SAR406_clade_;g__norank_p__Marinimicrobia__SAR406_clade_;s__uncultured_bacterium_g__norank_p__Marinimicrobia__SAR406_clade_
OTU1298	0	0	0	0	0	0	0	1	0	0	0	d__Bacteria;k__norank;p__Proteobacteria;c__Alphaproteobacteria;o__Rhizobiales;f__Xanthobacteraceae;g__Xanthobacter;s__Xanthobacter_flavus_g__Xanthobacter
OTU1299	0	0	1	0	0	0	1	1	0	0	0	d__Bacteria;k__norank;p__Planctomycetes;c__BD7-11;o__norank_c__BD7-11;f__norank_c__BD7-11;g__norank_c__BD7-11;s__unclassified_g__norank_c__BD7-11
OTU1300	0	0	0	1	0	0	1	1	0	0	0	d__Bacteria;k__norank;p__Marinimicrobia__SAR406_clade_;c__norank_p__Marinimicrobia__SAR406_clade_;o__norank_p__Marinimicrobia__SAR406_clade_;f__norank_p__Marinimicrobia__SAR406_clade_;g__norank_p__Marinimicrobia__SAR406_clade_;s__uncultured_Marinimicrobia_bacterium_HF4000_22B16
OTU1301	0	0	1	1	0	0	1	1	0	0	0	d__Bacteria;k__norank;p__Marinimicrobia__SAR406_clade_;c__norank_p__Marinimicrobia__SAR406_clade_;o__norank_p__Marinimicrobia__SAR406_clade_;f__norank_p__Marinimicrobia__SAR406_clade_;g__norank_p__Marinimicrobia__SAR406_clade_;s__uncultured_bacterium_g__norank_p__Marinimicrobia__SAR406_clade_
OTU1302	0	0	1	1	0	0	1	1	0	0	0	d__Bacteria;k__norank;p__Marinimicrobia__SAR406_clade_;c__norank_p__Marinimicrobia__SAR406_clade_;o__norank_p__Marinimicrobia__SAR406_clade_;f__norank_p__Marinimicrobia__SAR406_clade_;g__norank_p__Marinimicrobia__SAR406_clade_;s__unclassified_g__norank_p__Marinimicrobia__SAR406_clade_
OTU1303	0	0	0	0	0	0	0	1	0	0	0	d__Bacteria;k__norank;p__Actinobacteria;c__Actinobacteria;o__Bifidobacteriales;f__Bifidobacteriaceae;g__Gardnerella;s__Gardnerella_vaginalis_409-05
OTU1304	0	0	1	1	0	0	1	1	0	0	0	d__Bacteria;k__norank;p__Acidobacteria;c__Acidobacteria;o__norank_c__Acidobacteria;f__norank_c__Acidobacteria;g__norank_c__Acidobacteria;s__unclassified_g__norank_c__Acidobacteria
OTU1305	0	0	0	1	0	0	0	1	0	0	0	d__Bacteria;k__norank;p__Acidobacteria;c__Acidobacteria;o__norank_c__Acidobacteria;f__norank_c__Acidobacteria;g__norank_c__Acidobacteria;s__unclassified_g__norank_c__Acidobacteria
OTU1306	0	0	1	0	0	1	1	1	0	0	0	d__Bacteria;k__norank;p__Proteobacteria;c__Deltaproteobacteria;o__Bdellovibrionales;f__Bdellovibrionaceae;g__OM27_clade;s__uncultured_bacterium_g__OM27_clade
OTU1307	0	0	1	1	0	0	1	1	0	0	0	d__Bacteria;k__norank;p__Proteobacteria;c__Alphaproteobacteria;o__Rhodospirillales;f__Rhodospirillaceae;g__AEGEAN-169_marine_group;s__uncultured_bacterium_g__AEGEAN-169_marine_group
OTU1308	0	0	0	0	0	0	0	1	0	0	0	d__Bacteria;k__norank;p__Gemmatimonadetes;c__Gemmatimonadetes;o__norank_c__Gemmatimonadetes;f__norank_c__Gemmatimonadetes;g__norank_c__Gemmatimonadetes;s__uncultured_bacterium_g__norank_c__Gemmatimonadetes
OTU1309	0	0	1	1	0	0	1	1	0	0	0	d__Bacteria;k__norank;p__Marinimicrobia__SAR406_clade_;c__norank_p__Marinimicrobia__SAR406_clade_;o__norank_p__Marinimicrobia__SAR406_clade_;f__norank_p__Marinimicrobia__SAR406_clade_;g__norank_p__Marinimicrobia__SAR406_clade_;s__uncultured_bacterium_g__norank_p__Marinimicrobia__SAR406_clade_
OTU1310	0	0	1	1	0	0	1	1	0	0	0	d__Bacteria;k__norank;p__Proteobacteria;c__Deltaproteobacteria;o__Desulfurellales;f__Desulfurellaceae;g__G55;s__uncultured_bacterium_g__G55
OTU1311	0	0	1	1	0	0	1	1	0	0	0	d__Bacteria;k__norank;p__Acidobacteria;c__Acidobacteria;o__norank_c__Acidobacteria;f__norank_c__Acidobacteria;g__norank_c__Acidobacteria;s__uncultured_bacterium_SAT52-B4
OTU1312	0	0	0	1	0	0	1	1	0	0	0	d__Bacteria;k__norank;p__Proteobacteria;c__Deltaproteobacteria;o__NB1-j;f__norank_o__NB1-j;g__norank_o__NB1-j;s__hydrothermal_vent_metagenome_g__norank_o__NB1-j
OTU1313	0	0	1	1	0	0	1	1	0	0	0	d__Bacteria;k__norank;p__Marinimicrobia__SAR406_clade_;c__norank_p__Marinimicrobia__SAR406_clade_;o__norank_p__Marinimicrobia__SAR406_clade_;f__norank_p__Marinimicrobia__SAR406_clade_;g__norank_p__Marinimicrobia__SAR406_clade_;s__uncultured_bacterium_g__norank_p__Marinimicrobia__SAR406_clade_
OTU1314	1	0	0	1	0	1	1	1	0	0	0	d__Bacteria;k__norank;p__Verrucomicrobia;c__Opitutae;o__A714019;f__norank_o__A714019;g__norank_o__A714019;s__uncultured_verrucomicrobium_HF0500_27H16
OTU1315	1	1	1	1	1	1	1	1	1	1	1	d__Bacteria;k__norank;p__Proteobacteria;c__Alphaproteobacteria;o__SAR11_clade;f__Surface_1;g__unclassified_f__Surface_1;s__unclassified_f__Surface_1
OTU1316	0	0	0	0	0	0	1	1	0	0	0	d__Bacteria;k__norank;p__Proteobacteria;c__Gammaproteobacteria;o__Oceanospirillales;f__Oceanospirillaceae;g__Marinomonas;s__uncultured_marine_bacterium_g__Marinomonas
OTU1317	0	0	0	1	0	0	0	1	0	0	0	d__Bacteria;k__norank;p__Acidobacteria;c__Acidobacteria;o__norank_c__Acidobacteria;f__norank_c__Acidobacteria;g__norank_c__Acidobacteria;s__uncultured_Acidobacteria_bacterium_HF4000_26D02
OTU1318	1	0	0	0	1	1	1	1	1	1	1	d__Bacteria;k__norank;p__Proteobacteria;c__Betaproteobacteria;o__Methylophilales;f__Methylophilaceae;g__Methylotenera;s__unclassified_g__Methylotenera
OTU1319	0	0	0	0	0	0	1	1	0	0	0	d__Bacteria;k__norank;p__Proteobacteria;c__Gammaproteobacteria;o__unclassified_c__Gammaproteobacteria;f__unclassified_c__Gammaproteobacteria;g__unclassified_c__Gammaproteobacteria;s__unclassified_c__Gammaproteobacteria
OTU1320	0	0	0	1	0	0	0	1	0	0	0	d__Bacteria;k__norank;p__Chloroflexi;c__SAR202_clade;o__norank_c__SAR202_clade;f__norank_c__SAR202_clade;g__norank_c__SAR202_clade;s__uncultured_Thermomicrobium_sp._g__norank
OTU1321	0	0	1	1	0	0	1	1	0	0	0	d__Bacteria;k__norank;p__Proteobacteria;c__Gammaproteobacteria;o__Oceanospirillales;f__SAR86_clade;g__norank_f__SAR86_clade;s__unclassified_g__norank_f__SAR86_clade
OTU1322	0	0	1	1	0	0	0	1	0	0	0	d__Bacteria;k__norank;p__unclassified_k__norank;c__unclassified_k__norank;o__unclassified_k__norank;f__unclassified_k__norank;g__unclassified_k__norank;s__unclassified_k__norank
OTU1323	0	0	1	1	0	0	1	1	0	0	0	d__Bacteria;k__norank;p__Proteobacteria;c__Gammaproteobacteria;o__Xanthomonadales;f__norank_o__Xanthomonadales;g__norank_o__Xanthomonadales;s__unclassified_g__norank_o__Xanthomonadales
OTU1324	1	0	1	1	1	1	1	1	1	1	1	d__Bacteria;k__norank;p__Proteobacteria;c__Gammaproteobacteria;o__Thiotrichales;f__Piscirickettsiaceae;g__Methylophaga;s__unclassified_g__Methylophaga
OTU1325	0	0	0	0	0	0	1	1	0	0	0	d__Bacteria;k__norank;p__Proteobacteria;c__Gammaproteobacteria;o__Xanthomonadales;f__JTB255_marine_benthic_group;g__norank_f__JTB255_marine_benthic_group;s__unclassified_g__norank_f__JTB255_marine_benthic_group
OTU1326	0	0	1	0	0	0	1	1	0	0	0	d__Bacteria;k__norank;p__Chloroflexi;c__SAR202_clade;o__norank_c__SAR202_clade;f__norank_c__SAR202_clade;g__norank_c__SAR202_clade;s__uncultured_bacterium_g__norank_c__SAR202_clade
OTU1327	0	0	1	1	0	0	1	1	0	0	0	d__Bacteria;k__norank;p__Acidobacteria;c__Acidobacteria;o__norank_c__Acidobacteria;f__norank_c__Acidobacteria;g__norank_c__Acidobacteria;s__uncultured_marine_microorganism_g__norank_c__Acidobacteria
OTU1328	0	0	1	1	0	0	1	1	0	0	0	d__Bacteria;k__norank;p__Proteobacteria;c__Deltaproteobacteria;o__NB1-j;f__norank_o__NB1-j;g__norank_o__NB1-j;s__unclassified_g__norank_o__NB1-j
OTU1329	0	0	1	1	0	1	1	1	0	0	0	d__Bacteria;k__norank;p__Proteobacteria;c__Gammaproteobacteria;o__Oceanospirillales;f__OM182_clade;g__norank_f__OM182_clade;s__unclassified_g__norank_f__OM182_clade
OTU1330	0	0	0	0	0	0	0	1	0	0	0	d__Bacteria;k__norank;p__Planctomycetes;c__OM190;o__norank_c__OM190;f__norank_c__OM190;g__norank_c__OM190;s__uncultured_planctomycete_g__norank_c__OM190
OTU1331	0	0	1	1	0	1	1	1	0	0	0	d__Bacteria;k__norank;p__Marinimicrobia__SAR406_clade_;c__norank_p__Marinimicrobia__SAR406_clade_;o__norank_p__Marinimicrobia__SAR406_clade_;f__norank_p__Marinimicrobia__SAR406_clade_;g__norank_p__Marinimicrobia__SAR406_clade_;s__uncultured_bacterium_g__norank_p__Marinimicrobia__SAR406_clade_
OTU1332	0	0	1	0	0	0	1	1	0	0	0	d__Bacteria;k__norank;p__Marinimicrobia__SAR406_clade_;c__norank_p__Marinimicrobia__SAR406_clade_;o__norank_p__Marinimicrobia__SAR406_clade_;f__norank_p__Marinimicrobia__SAR406_clade_;g__norank_p__Marinimicrobia__SAR406_clade_;s__unclassified_g__norank_p__Marinimicrobia__SAR406_clade_
OTU1333	0	0	1	1	0	0	1	1	0	0	0	d__Bacteria;k__norank;p__Proteobacteria;c__Alphaproteobacteria;o__Rhodospirillales;f__Rhodospirillaceae;g__norank_f__Rhodospirillaceae;s__unclassified_g__norank_f__Rhodospirillaceae
OTU1334	0	0	0	0	0	0	0	1	0	0	0	d__Bacteria;k__norank;p__Firmicutes;c__Clostridia;o__Clostridiales;f__Family_XI_o__Clostridiales;g__Ezakiella;s__uncultured_bacterium_g__Ezakiella
OTU1335	0	0	0	1	0	0	1	1	0	0	0	d__Bacteria;k__norank;p__Proteobacteria;c__Alphaproteobacteria;o__Rhodospirillales;f__AT-s3-44;g__norank_f__AT-s3-44;s__unclassified_g__norank_f__AT-s3-44
OTU1336	0	1	0	1	0	0	1	1	0	0	0	d__Bacteria;k__norank;p__Proteobacteria;c__Gammaproteobacteria;o__Enterobacteriales;f__Enterobacteriaceae;g__Raoultella;s__unclassified_g__Raoultella
OTU1337	0	0	1	1	0	0	1	1	0	0	0	d__Bacteria;k__norank;p__Proteobacteria;c__Gammaproteobacteria;o__Oceanospirillales;f__Oceanospirillaceae;g__Pseudohongiella;s__uncultured_bacterium_g__Pseudohongiella
OTU1338	0	0	0	1	1	1	1	1	1	1	1	d__Bacteria;k__norank;p__Proteobacteria;c__Alphaproteobacteria;o__Sphingomonadales;f__Erythrobacteraceae;g__unclassified_f__Erythrobacteraceae;s__unclassified_f__Erythrobacteraceae
OTU1339	0	0	1	1	0	0	1	1	0	0	0	d__Bacteria;k__norank;p__Verrucomicrobia;c__Arctic97B-4_marine_group;o__norank_c__Arctic97B-4_marine_group;f__norank_c__Arctic97B-4_marine_group;g__norank_c__Arctic97B-4_marine_group;s__uncultured_organism_g__norank_c__Arctic97B-4_marine_group
OTU1340	0	0	1	0	0	1	0	1	0	0	0	d__Bacteria;k__norank;p__Cyanobacteria;c__Cyanobacteria;o__norank_c__Cyanobacteria;f__norank_c__Cyanobacteria;g__norank_c__Cyanobacteria;s__unclassified_g__norank_c__Cyanobacteria
OTU1341	1	1	0	1	1	1	1	1	1	1	1	d__Bacteria;k__norank;p__Proteobacteria;c__Alphaproteobacteria;o__Sphingomonadales;f__Sphingomonadaceae;g__Sphingopyxis;s__unclassified_g__Sphingopyxis
OTU1342	1	0	0	1	0	0	0	1	1	0	1	d__Bacteria;k__norank;p__Proteobacteria;c__Alphaproteobacteria;o__Rhizobiales;f__Rhizobiaceae;g__Shinella;s__unclassified_g__Shinella
OTU1343	0	0	0	0	0	0	0	1	0	0	0	d__Bacteria;k__norank;p__Firmicutes;c__Bacilli;o__Lactobacillales;f__Carnobacteriaceae;g__Granulicatella;s__unclassified_g__Granulicatella
OTU1344	1	0	0	0	0	0	0	1	0	1	0	d__Bacteria;k__norank;p__Proteobacteria;c__Gammaproteobacteria;o__Cellvibrionales;f__Halieaceae;g__Haliea;s__unclassified_g__Haliea
OTU1345	0	0	1	1	0	0	1	1	0	0	0	d__Bacteria;k__norank;p__Acidobacteria;c__Acidobacteria;o__norank_c__Acidobacteria;f__norank_c__Acidobacteria;g__norank_c__Acidobacteria;s__unclassified_g__norank_c__Acidobacteria
OTU1346	0	0	0	0	0	0	1	1	0	0	0	d__Bacteria;k__norank;p__Marinimicrobia__SAR406_clade_;c__norank_p__Marinimicrobia__SAR406_clade_;o__norank_p__Marinimicrobia__SAR406_clade_;f__norank_p__Marinimicrobia__SAR406_clade_;g__norank_p__Marinimicrobia__SAR406_clade_;s__unclassified_g__norank_p__Marinimicrobia__SAR406_clade_
OTU1347	0	0	1	1	0	0	1	1	0	0	0	d__Bacteria;k__norank;p__Marinimicrobia__SAR406_clade_;c__norank_p__Marinimicrobia__SAR406_clade_;o__norank_p__Marinimicrobia__SAR406_clade_;f__norank_p__Marinimicrobia__SAR406_clade_;g__norank_p__Marinimicrobia__SAR406_clade_;s__unclassified_g__norank_p__Marinimicrobia__SAR406_clade_
OTU1348	0	1	1	1	0	1	1	1	0	0	1	d__Bacteria;k__norank;p__Marinimicrobia__SAR406_clade_;c__norank_p__Marinimicrobia__SAR406_clade_;o__norank_p__Marinimicrobia__SAR406_clade_;f__norank_p__Marinimicrobia__SAR406_clade_;g__norank_p__Marinimicrobia__SAR406_clade_;s__uncultured_bacterium_g__norank_p__Marinimicrobia__SAR406_clade_
OTU1349	1	1	0	1	1	1	1	1	1	1	1	d__Bacteria;k__norank;p__Proteobacteria;c__Alphaproteobacteria;o__Rhodobacterales;f__Rhodobacteraceae;g__Yangia;s__unclassified_g__Yangia
OTU1350	0	0	0	0	0	0	1	1	0	0	0	d__Bacteria;k__norank;p__Bacteroidetes;c__Sphingobacteriia;o__Sphingobacteriales;f__Saprospiraceae;g__norank_f__Saprospiraceae;s__marine_metagenome_g__norank_f__Saprospiraceae
OTU1351	0	0	0	1	1	0	1	1	1	1	1	d__Bacteria;k__norank;p__Proteobacteria;c__Gammaproteobacteria;o__Oceanospirillales;f__Oleiphilaceae;g__Oleiphilus;s__unclassified_g__Oleiphilus
OTU1352	1	1	0	1	1	1	1	1	1	1	1	d__Bacteria;k__norank;p__Cyanobacteria;c__Cyanobacteria;o__norank_c__Cyanobacteria;f__norank_c__Cyanobacteria;g__norank_c__Cyanobacteria;s__unclassified_g__norank_c__Cyanobacteria
OTU1353	0	0	1	1	0	0	1	1	0	0	0	d__Bacteria;k__norank;p__Proteobacteria;c__Alphaproteobacteria;o__Rhodospirillales;f__Rhodospirillaceae;g__AEGEAN-169_marine_group;s__uncultured_bacterium_g__AEGEAN-169_marine_group
OTU1354	0	0	0	0	0	0	0	1	0	0	0	d__Bacteria;k__norank;p__Bacteroidetes;c__Flavobacteriia;o__Flavobacteriales;f__Flavobacteriaceae;g__Capnocytophaga;s__unclassified_g__Capnocytophaga
OTU1355	1	1	1	1	1	1	1	1	1	1	1	d__Bacteria;k__norank;p__Proteobacteria;c__Gammaproteobacteria;o__Cellvibrionales;f__Spongiibacteraceae;g__Spongiibacter;s__unclassified_g__Spongiibacter
OTU1356	0	0	1	0	0	0	1	1	0	0	0	d__Bacteria;k__norank;p__Proteobacteria;c__Alphaproteobacteria;o__Rhizobiales;f__KF-JG30-B3;g__norank_f__KF-JG30-B3;s__uncultured_alpha_proteobacterium_g__norank_f__KF-JG30-B3
OTU1357	0	1	1	0	0	0	1	1	0	0	0	d__Bacteria;k__norank;p__Bacteroidetes;c__Sphingobacteriia;o__Sphingobacteriales;f__Saprospiraceae;g__norank_f__Saprospiraceae;s__marine_metagenome_g__norank_f__Saprospiraceae
OTU1358	0	0	1	1	0	1	1	1	0	0	0	d__Bacteria;k__norank;p__Proteobacteria;c__Deltaproteobacteria;o__Myxococcales;f__Blfdi19;g__norank_f__Blfdi19;s__uncultured_bacterium_g__norank_f__Blfdi19
OTU1359	0	0	1	0	0	1	0	1	0	0	0	d__Bacteria;k__norank;p__Proteobacteria;c__Gammaproteobacteria;o__Legionellales;f__Coxiellaceae;g__Coxiella;s__unclassified_g__Coxiella
OTU1360	0	0	0	0	0	0	1	1	0	0	1	d__Bacteria;k__norank;p__Proteobacteria;c__Gammaproteobacteria;o__Legionellales;f__Coxiellaceae;g__Coxiella;s__unclassified_g__Coxiella
OTU1361	0	0	0	1	0	0	0	1	0	0	0	d__Bacteria;k__norank;p__Proteobacteria;c__Deltaproteobacteria;o__NB1-j;f__norank_o__NB1-j;g__norank_o__NB1-j;s__unclassified_g__norank_o__NB1-j
OTU1362	0	0	1	1	0	0	1	1	0	0	0	d__Bacteria;k__norank;p__Proteobacteria;c__Alphaproteobacteria;o__Rhodospirillales;f__AT-s3-44;g__norank_f__AT-s3-44;s__uncultured_bacterium_g__norank_f__AT-s3-44
OTU1363	0	0	0	0	0	0	0	1	0	0	0	d__Bacteria;k__norank;p__Planctomycetes;c__BD7-11;o__norank_c__BD7-11;f__norank_c__BD7-11;g__norank_c__BD7-11;s__uncultured_planctomycete_g__norank_c__BD7-11
OTU1364	0	0	0	1	0	0	0	1	0	0	0	d__Bacteria;k__norank;p__Parcubacteria;c__norank_p__Parcubacteria;o__norank_p__Parcubacteria;f__norank_p__Parcubacteria;g__norank_p__Parcubacteria;s__unclassified_g__norank_p__Parcubacteria
OTU1365	0	0	1	1	0	0	1	1	0	0	0	d__Bacteria;k__norank;p__Chloroflexi;c__SAR202_clade;o__norank_c__SAR202_clade;f__norank_c__SAR202_clade;g__norank_c__SAR202_clade;s__uncultured_bacterium_g__norank_c__SAR202_clade
OTU1366	0	0	0	1	0	0	0	1	0	0	0	d__Bacteria;k__norank;p__Chloroflexi;c__SAR202_clade;o__norank_c__SAR202_clade;f__norank_c__SAR202_clade;g__norank_c__SAR202_clade;s__unclassified_g__norank_c__SAR202_clade
OTU1367	0	0	1	1	0	0	1	1	0	0	0	d__Bacteria;k__norank;p__Gemmatimonadetes;c__Gemmatimonadetes;o__norank_c__Gemmatimonadetes;f__norank_c__Gemmatimonadetes;g__norank_c__Gemmatimonadetes;s__uncultured_bacterium_AD254-A9
OTU1368	0	0	1	1	0	0	1	1	0	0	0	d__Bacteria;k__norank;p__Gemmatimonadetes;c__Gemmatimonadetes;o__norank_c__Gemmatimonadetes;f__norank_c__Gemmatimonadetes;g__norank_c__Gemmatimonadetes;s__uncultured_Gemmatimonadales_bacterium_HF0200_34B24
OTU1369	0	0	0	0	0	0	1	1	0	0	0	d__Bacteria;k__norank;p__Proteobacteria;c__Deltaproteobacteria;o__Oligoflexales;f__053A03-B-DI-P58;g__norank_f__053A03-B-DI-P58;s__uncultured_bacterium_g__norank_f__053A03-B-DI-P58
OTU1370	0	0	1	0	0	1	1	1	0	0	0	d__Bacteria;k__norank;p__unclassified_k__norank;c__unclassified_k__norank;o__unclassified_k__norank;f__unclassified_k__norank;g__unclassified_k__norank;s__unclassified_k__norank
OTU1371	0	0	0	1	0	0	0	1	0	0	0	d__Bacteria;k__norank;p__Proteobacteria;c__Gammaproteobacteria;o__Legionellales;f__Coxiellaceae;g__Coxiella;s__unclassified_g__Coxiella
OTU1372	0	0	1	0	0	0	1	1	0	0	0	d__Bacteria;k__norank;p__Proteobacteria;c__Deltaproteobacteria;o__Bdellovibrionales;f__Bacteriovoracaceae;g__norank_f__Bacteriovoracaceae;s__unclassified_g__norank_f__Bacteriovoracaceae
OTU1373	0	0	0	1	0	1	0	1	0	0	1	d__Bacteria;k__norank;p__Actinobacteria;c__Actinobacteria;o__Corynebacteriales;f__Corynebacteriaceae;g__Corynebacterium_1;s__Corynebacterium_tuberculostearicum
OTU1374	1	0	0	0	1	0	0	1	1	1	1	d__Bacteria;k__norank;p__Bacteroidetes;c__Bacteroidetes_Incertae_Sedis;o__Order_III;f__Unknown_Family_o__Order_III;g__Balneola;s__uncultured_Balneola_sp.
OTU1375	1	0	0	0	1	0	0	0	1	0	1	d__Bacteria;k__norank;p__Proteobacteria;c__Alphaproteobacteria;o__Sneathiellales;f__Sneathiellaceae;g__Sneathiella;s__uncultured_bacterium_g__Sneathiella
OTU1376	0	0	0	0	1	0	0	0	0	0	0	d__Bacteria;k__norank;p__Proteobacteria;c__Gammaproteobacteria;o__Alteromonadales;f__Alteromonadaceae;g__unclassified_f__Alteromonadaceae;s__unclassified_f__Alteromonadaceae
OTU1377	1	0	0	0	1	1	0	0	1	1	1	d__Bacteria;k__norank;p__Proteobacteria;c__Deltaproteobacteria;o__Bradymonadales;f__norank_o__Bradymonadales;g__norank_o__Bradymonadales;s__uncultured_marine_bacterium_g__norank_o__Bradymonadales
OTU1378	1	0	0	0	1	0	0	0	0	0	1	d__Bacteria;k__norank;p__Proteobacteria;c__Alphaproteobacteria;o__Alphaproteobacteria_Incertae_Sedis;f__Unknown_Family_o__Alphaproteobacteria_Incertae_Sedis;g__norank_f__Unknown_Family_o__Alphaproteobacteria_Incertae_Sedis;s__uncultured_bacterium_g__norank_f__Unknown_Family_o__Alphaproteobacteria_Incertae_Sedis
OTU1379	0	0	0	1	1	0	0	0	1	1	0	d__Bacteria;k__norank;p__Proteobacteria;c__Deltaproteobacteria;o__NB1-j;f__norank_o__NB1-j;g__norank_o__NB1-j;s__unclassified_g__norank_o__NB1-j
OTU1380	0	1	1	1	1	1	1	1	0	1	0	d__Bacteria;k__norank;p__Proteobacteria;c__Deltaproteobacteria;o__Myxococcales;f__P3OB-42;g__norank_f__P3OB-42;s__unclassified_g__norank_f__P3OB-42
OTU1381	0	0	0	0	1	0	0	0	1	1	1	d__Bacteria;k__norank;p__Bacteroidetes;c__Cytophagia;o__Cytophagales;f__Flammeovirgaceae;g__norank_f__Flammeovirgaceae;s__unclassified_g__norank_f__Flammeovirgaceae
OTU1382	1	1	0	0	1	0	0	0	1	1	1	d__Bacteria;k__norank;p__Proteobacteria;c__Alphaproteobacteria;o__SAR11_clade;f__unclassified_o__SAR11_clade;g__unclassified_o__SAR11_clade;s__unclassified_o__SAR11_clade
OTU1383	0	0	0	0	1	0	0	0	1	1	1	d__Bacteria;k__norank;p__Bacteroidetes;c__Flavobacteriia;o__Flavobacteriales;f__Cryomorphaceae;g__norank_f__Cryomorphaceae;s__unclassified_g__norank_f__Cryomorphaceae
OTU1384	1	1	0	0	1	1	1	1	1	1	1	d__Bacteria;k__norank;p__Proteobacteria;c__Gammaproteobacteria;o__Legionellales;f__Coxiellaceae;g__Coxiella;s__uncultured_bacterium_g__Coxiella
OTU1385	0	0	0	0	1	0	0	0	0	0	0	d__Bacteria;k__norank;p__Hydrogenedentes;c__norank_p__Hydrogenedentes;o__norank_p__Hydrogenedentes;f__norank_p__Hydrogenedentes;g__norank_p__Hydrogenedentes;s__unclassified_g__norank_p__Hydrogenedentes
OTU1386	1	0	0	0	1	0	0	0	1	0	0	d__Bacteria;k__norank;p__Proteobacteria;c__Gammaproteobacteria;o__Oceanospirillales;f__SS1-B-06-26;g__norank_f__SS1-B-06-26;s__uncultured_bacterium_g__norank_f__SS1-B-06-26
OTU1387	1	1	0	0	1	1	0	0	1	1	1	d__Bacteria;k__norank;p__Cyanobacteria;c__Cyanobacteria;o__norank_c__Cyanobacteria;f__norank_c__Cyanobacteria;g__norank_c__Cyanobacteria;s__unclassified_g__norank_c__Cyanobacteria
OTU1388	1	1	1	1	1	1	1	1	1	1	1	d__Bacteria;k__norank;p__Cyanobacteria;c__Cyanobacteria;o__SubsectionI;f__FamilyI_o__SubsectionI;g__Prochlorococcus;s__unclassified_g__Prochlorococcus
OTU1389	0	0	0	0	1	0	0	0	1	1	0	d__Bacteria;k__norank;p__Proteobacteria;c__Gammaproteobacteria;o__KI89A_clade;f__norank_o__KI89A_clade;g__norank_o__KI89A_clade;s__uncultured_bacterium_g__norank_o__KI89A_clade
OTU1390	1	1	0	0	1	0	0	0	1	1	1	d__Bacteria;k__norank;p__Proteobacteria;c__Gammaproteobacteria;o__Oceanospirillales;f__SAR86_clade;g__norank_f__SAR86_clade;s__Rhodobacteraceae_bacterium_REDSEA-S29_B10
OTU1391	1	1	0	0	1	1	0	0	1	1	1	d__Bacteria;k__norank;p__Bacteroidetes;c__Cytophagia;o__Cytophagales;f__Flammeovirgaceae;g__Marinoscillum;s__uncultured_Cytophagia_bacterium_g__Marinoscillum
OTU1392	1	0	0	0	1	0	0	0	1	1	1	d__Bacteria;k__norank;p__Bacteroidetes;c__Flavobacteriia;o__Flavobacteriales;f__Cryomorphaceae;g__Luteibaculum;s__uncultured_bacterium_g__Luteibaculum
OTU1393	1	1	0	0	1	0	0	0	1	1	1	d__Bacteria;k__norank;p__Proteobacteria;c__Deltaproteobacteria;o__Bdellovibrionales;f__Bacteriovoracaceae;g__norank_f__Bacteriovoracaceae;s__unclassified_g__norank_f__Bacteriovoracaceae
OTU1394	1	1	0	0	1	1	0	1	1	1	1	d__Bacteria;k__norank;p__Gracilibacteria;c__norank_p__Gracilibacteria;o__norank_p__Gracilibacteria;f__norank_p__Gracilibacteria;g__norank_p__Gracilibacteria;s__uncultured_bacterium_g__norank_p__Gracilibacteria
OTU1395	1	0	0	0	1	1	0	0	1	0	1	d__Bacteria;k__norank;p__Proteobacteria;c__Deltaproteobacteria;o__Bdellovibrionales;f__Bdellovibrionaceae;g__OM27_clade;s__unclassified_g__OM27_clade
OTU1396	0	1	1	0	1	1	1	0	1	1	1	d__Bacteria;k__norank;p__Proteobacteria;c__Deltaproteobacteria;o__Bradymonadales;f__norank_o__Bradymonadales;g__norank_o__Bradymonadales;s__unclassified_g__norank_o__Bradymonadales
OTU1397	1	0	0	0	1	0	0	0	0	1	1	d__Bacteria;k__norank;p__Proteobacteria;c__Alphaproteobacteria;o__unclassified_c__Alphaproteobacteria;f__unclassified_c__Alphaproteobacteria;g__unclassified_c__Alphaproteobacteria;s__unclassified_c__Alphaproteobacteria
OTU1398	1	0	0	0	1	0	0	1	0	0	0	d__Bacteria;k__norank;p__Proteobacteria;c__Gammaproteobacteria;o__Oceanospirillales;f__Alcanivoracaceae;g__Kangiella;s__uncultured_bacterium_g__Kangiella
OTU1399	1	0	0	0	1	0	0	1	0	0	1	d__Bacteria;k__norank;p__Bacteroidetes;c__Cytophagia;o__Cytophagales;f__Flammeovirgaceae;g__Ekhidna;s__unclassified_g__Ekhidna
OTU1400	0	0	0	0	1	0	0	0	1	0	0	d__Bacteria;k__norank;p__unclassified_k__norank;c__unclassified_k__norank;o__unclassified_k__norank;f__unclassified_k__norank;g__unclassified_k__norank;s__unclassified_k__norank
OTU1401	1	0	0	0	1	0	0	0	1	1	1	d__Bacteria;k__norank;p__Proteobacteria;c__Deltaproteobacteria;o__Bdellovibrionales;f__Bacteriovoracaceae;g__unclassified_f__Bacteriovoracaceae;s__unclassified_f__Bacteriovoracaceae
OTU1402	1	0	0	0	1	0	0	0	0	1	1	d__Bacteria;k__norank;p__Proteobacteria;c__Gammaproteobacteria;o__unclassified_c__Gammaproteobacteria;f__unclassified_c__Gammaproteobacteria;g__unclassified_c__Gammaproteobacteria;s__unclassified_c__Gammaproteobacteria
OTU1403	1	0	0	0	1	0	1	0	1	1	1	d__Bacteria;k__norank;p__Proteobacteria;c__Alphaproteobacteria;o__Rickettsiales;f__Mitochondria;g__norank_f__Mitochondria;s__unclassified_g__norank_f__Mitochondria
OTU1404	0	0	0	0	1	0	0	0	1	1	1	d__Bacteria;k__norank;p__Proteobacteria;c__Gammaproteobacteria;o__Cellvibrionales;f__Cellvibrionaceae;g__unclassified_f__Cellvibrionaceae;s__unclassified_f__Cellvibrionaceae
OTU1405	1	0	1	0	1	1	0	0	1	1	1	d__Bacteria;k__norank;p__Proteobacteria;c__Gammaproteobacteria;o__Oceanospirillales;f__SAR86_clade;g__norank_f__SAR86_clade;s__unclassified_g__norank_f__SAR86_clade
OTU1406	1	0	0	0	1	0	0	0	1	1	1	d__Bacteria;k__norank;p__Proteobacteria;c__Deltaproteobacteria;o__Bradymonadales;f__norank_o__Bradymonadales;g__norank_o__Bradymonadales;s__unclassified_g__norank_o__Bradymonadales
OTU1407	1	0	0	0	1	0	0	0	0	0	1	d__Bacteria;k__norank;p__Proteobacteria;c__Deltaproteobacteria;o__Bdellovibrionales;f__Bacteriovoracaceae;g__Peredibacter;s__unclassified_g__Peredibacter
OTU1408	1	0	0	0	1	0	0	0	1	1	1	d__Bacteria;k__norank;p__Proteobacteria;c__SPOTSOCT00m83;o__norank_c__SPOTSOCT00m83;f__norank_c__SPOTSOCT00m83;g__norank_c__SPOTSOCT00m83;s__uncultured_gamma_proteobacterium_g__norank_c__SPOTSOCT00m83
OTU1409	1	0	0	0	1	0	0	0	1	1	1	d__Bacteria;k__norank;p__Proteobacteria;c__Deltaproteobacteria;o__NB1-j;f__norank_o__NB1-j;g__norank_o__NB1-j;s__unclassified_g__norank_o__NB1-j
OTU1410	0	0	0	0	1	0	0	0	1	0	0	d__Bacteria;k__norank;p__Proteobacteria;c__Deltaproteobacteria;o__Myxococcales;f__BIrii41;g__norank_f__BIrii41;s__unclassified_g__norank_f__BIrii41
OTU1411	0	0	0	0	1	0	0	0	1	1	1	d__Bacteria;k__norank;p__Bacteroidetes;c__Bacteroidetes_Incertae_Sedis;o__Order_II;f__Rhodothermaceae;g__norank_f__Rhodothermaceae;s__unclassified_g__norank_f__Rhodothermaceae
OTU1412	1	0	1	0	1	0	0	0	1	1	1	d__Bacteria;k__norank;p__Verrucomicrobia;c__OPB35_soil_group;o__norank_c__OPB35_soil_group;f__norank_c__OPB35_soil_group;g__norank_c__OPB35_soil_group;s__uncultured_Verrucomicrobia_bacterium_g__norank_c__OPB35_soil_group
OTU1413	1	0	0	0	1	0	0	0	0	0	1	d__Bacteria;k__norank;p__Proteobacteria;c__Gammaproteobacteria;o__unclassified_c__Gammaproteobacteria;f__unclassified_c__Gammaproteobacteria;g__unclassified_c__Gammaproteobacteria;s__unclassified_c__Gammaproteobacteria
OTU1414	1	0	0	0	1	1	1	1	1	1	0	d__Bacteria;k__norank;p__Proteobacteria;c__Gammaproteobacteria;o__Legionellales;f__Coxiellaceae;g__Coxiella;s__uncultured_gamma_proteobacterium_g__Coxiella
OTU1415	1	1	0	0	1	0	0	0	1	1	1	d__Bacteria;k__norank;p__Verrucomicrobia;c__Opitutae;o__Puniceicoccales;f__Puniceicoccaceae;g__marine_group_f__Puniceicoccaceae;s__uncultured_bacterium_g__marine_group_f__Puniceicoccaceae
OTU1416	1	1	1	0	1	1	0	0	1	1	1	d__Bacteria;k__norank;p__Bacteroidetes;c__Flavobacteriia;o__Flavobacteriales;f__Flavobacteriaceae;g__NS4_marine_group;s__unclassified_g__NS4_marine_group
OTU1417	1	1	0	0	1	1	1	0	1	1	1	d__Bacteria;k__norank;p__Bacteroidetes;c__Flavobacteriia;o__Flavobacteriales;f__Flavobacteriaceae;g__NS4_marine_group;s__uncultured_bacterium_g__NS4_marine_group
OTU1418	1	1	0	0	1	1	0	0	1	1	1	d__Bacteria;k__norank;p__Bacteroidetes;c__Flavobacteriia;o__Flavobacteriales;f__Flavobacteriaceae;g__NS2b_marine_group;s__uncultured_Flavobacteriia_bacterium_g__NS2b_marine_group
OTU1419	0	0	0	0	1	0	0	0	1	1	1	d__Bacteria;k__norank;p__Proteobacteria;c__Gammaproteobacteria;o__unclassified_c__Gammaproteobacteria;f__unclassified_c__Gammaproteobacteria;g__unclassified_c__Gammaproteobacteria;s__unclassified_c__Gammaproteobacteria
OTU1420	0	0	0	0	1	0	0	0	0	0	0	d__Bacteria;k__norank;p__Proteobacteria;c__Deltaproteobacteria;o__Bdellovibrionales;f__Bacteriovoracaceae;g__Peredibacter;s__unclassified_g__Peredibacter
OTU1421	1	0	0	0	1	0	0	0	1	0	0	d__Bacteria;k__norank;p__Fusobacteria;c__Fusobacteriia;o__Fusobacteriales;f__Leptotrichiaceae;g__norank_f__Leptotrichiaceae;s__marine_metagenome_g__norank_f__Leptotrichiaceae
OTU1422	0	0	0	0	1	0	0	0	1	1	0	d__Bacteria;k__norank;p__Proteobacteria;c__Deltaproteobacteria;o__Myxococcales;f__Sandaracinaceae;g__norank_f__Sandaracinaceae;s__unclassified_g__norank_f__Sandaracinaceae
OTU1423	1	0	0	0	1	0	0	0	1	1	0	d__Bacteria;k__norank;p__Proteobacteria;c__Alphaproteobacteria;o__Alphaproteobacteria_Incertae_Sedis;f__norank_o__Alphaproteobacteria_Incertae_Sedis;g__norank_o__Alphaproteobacteria_Incertae_Sedis;s__unclassified_g__norank_o__Alphaproteobacteria_Incertae_Sedis
OTU1424	0	0	0	0	1	0	0	0	0	0	0	d__Bacteria;k__norank;p__Hydrogenedentes;c__norank_p__Hydrogenedentes;o__norank_p__Hydrogenedentes;f__norank_p__Hydrogenedentes;g__norank_p__Hydrogenedentes;s__uncultured_bacterium_g__norank_p__Hydrogenedentes
OTU1425	1	0	0	0	1	0	0	0	1	1	0	d__Bacteria;k__norank;p__Proteobacteria;c__Deltaproteobacteria;o__Desulfurellales;f__Desulfurellaceae;g__H16;s__unclassified_g__H16
OTU1426	1	1	0	0	1	1	0	0	1	1	1	d__Bacteria;k__norank;p__Proteobacteria;c__Deltaproteobacteria;o__Bradymonadales;f__norank_o__Bradymonadales;g__norank_o__Bradymonadales;s__uncultured_marine_microorganism_g__norank_o__Bradymonadales
OTU1427	0	0	0	0	1	0	0	0	0	0	0	d__Bacteria;k__norank;p__SR1__Absconditabacteria_;c__norank_p__SR1__Absconditabacteria_;o__norank_p__SR1__Absconditabacteria_;f__norank_p__SR1__Absconditabacteria_;g__norank_p__SR1__Absconditabacteria_;s__uncultured_bacterium_g__norank_p__SR1__Absconditabacteria_
