# Supplementary material for: Diversity, distribution and nitrogen use strategies of bacteria in the South China Sea basin
Source: Copernicus journal article supplement (doi:10.5194/bg-2018-529), 2019-02-12
Supplement: Supplementary file 2 [file Table S5.xlsx]

## Sheet: Sheet1
Table S5. OTUs identified in nifH samples
OTU ID	A2_surface	B1_surface	SEATs_68m	C1_surface	SS1_surface	SEATs_surface	SS1_200m	SS1_105m	SEATs_750m	SEATs_200m	taxonomy
OTU1	5	0	0	0	0	0	0	0	0	0	d__Bacteria;k__unclassified_d__Bacteria;p__Proteobacteria;c__Alphaproteobacteria;o__Rhodospirillales;f__Rhodospirillaceae;g__Azospirillum;s__Azospirillum_lipoferum
OTU2	2	3	1	3	0	0	0	0	0	0	d__unclassified;k__unclassified;p__unclassified;c__unclassified;o__unclassified;f__unclassified;g__unclassified;s__unclassified
OTU3	9	1	0	0	2	0	0	0	0	0	d__unclassified;k__unclassified;p__unclassified;c__unclassified;o__unclassified;f__unclassified;g__unclassified;s__unclassified
OTU4	6	25	0	11	0	0	0	0	0	0	d__unclassified;k__unclassified;p__unclassified;c__unclassified;o__unclassified;f__unclassified;g__unclassified;s__unclassified
OTU5	11	1	0	2	0	0	0	0	0	0	d__unclassified;k__unclassified;p__unclassified;c__unclassified;o__unclassified;f__unclassified;g__unclassified;s__unclassified
OTU6	238	44	0	14	14	1	0	0	0	0	d__unclassified;k__unclassified;p__unclassified;c__unclassified;o__unclassified;f__unclassified;g__unclassified;s__unclassified
OTU7	1	3	0	4	0	0	0	0	0	0	d__unclassified;k__unclassified;p__unclassified;c__unclassified;o__unclassified;f__unclassified;g__unclassified;s__unclassified
OTU8	118	18	0	37	1	0	0	0	0	0	d__unclassified;k__unclassified;p__unclassified;c__unclassified;o__unclassified;f__unclassified;g__unclassified;s__unclassified
OTU9	3	0	0	1	0	0	0	0	0	0	d__unclassified;k__unclassified;p__unclassified;c__unclassified;o__unclassified;f__unclassified;g__unclassified;s__unclassified
OTU10	10	0	0	0	2	0	0	0	0	0	d__unclassified;k__unclassified;p__unclassified;c__unclassified;o__unclassified;f__unclassified;g__unclassified;s__unclassified
OTU11	23	3	0	2	1	0	0	0	0	0	d__unclassified;k__unclassified;p__unclassified;c__unclassified;o__unclassified;f__unclassified;g__unclassified;s__unclassified
OTU12	9	0	0	0	1	1	0	0	0	0	d__Bacteria;k__unclassified_d__Bacteria;p__Proteobacteria;c__Alphaproteobacteria;o__Rhodobacterales;f__Rhodobacteraceae;g__Celeribacter;s__Celeribacter_manganoxidans
OTU13	42	10	0	5	1	4	0	0	0	0	d__Bacteria;k__unclassified_d__Bacteria;p__Cyanobacteria;c__unclassified_p__Cyanobacteria;o__Synechococcales;f__Synechococcaceae;g__Synechococcus;s__Synechococcus_sp._CC9605
OTU14	7	0	0	4	3	1	0	0	0	0	d__Bacteria;k__unclassified_d__Bacteria;p__unclassified_d__Bacteria;c__unclassified_d__Bacteria;o__unclassified_d__Bacteria;f__unclassified_d__Bacteria;g__unclassified_d__Bacteria;s__uncultured_bacterium
OTU15	3	0	0	0	0	0	0	0	0	0	d__unclassified;k__unclassified;p__unclassified;c__unclassified;o__unclassified;f__unclassified;g__unclassified;s__unclassified
OTU16	153	633	0	58	32	0	0	0	0	0	d__Bacteria;k__unclassified_d__Bacteria;p__unclassified_d__Bacteria;c__unclassified_d__Bacteria;o__unclassified_d__Bacteria;f__unclassified_d__Bacteria;g__unclassified_d__Bacteria;s__uncultured_bacterium
OTU17	9	0	0	2	0	0	0	0	0	0	d__unclassified;k__unclassified;p__unclassified;c__unclassified;o__unclassified;f__unclassified;g__unclassified;s__unclassified
OTU18	52	0	0	1	0	0	0	0	0	0	d__unclassified;k__unclassified;p__unclassified;c__unclassified;o__unclassified;f__unclassified;g__unclassified;s__unclassified
OTU19	6	0	0	1	0	0	0	0	0	0	d__Bacteria;k__unclassified_d__Bacteria;p__Planctomycetes;c__Planctomycetia;o__Planctomycetales;f__Planctomycetaceae;g__Fuerstia_f__Planctomycetaceae;s__Fuerstia_marisgermanicae
OTU20	17	0	0	4	10	0	0	0	0	0	d__unclassified;k__unclassified;p__unclassified;c__unclassified;o__unclassified;f__unclassified;g__unclassified;s__unclassified
OTU21	13	0	0	1	0	0	0	0	0	0	d__unclassified;k__unclassified;p__unclassified;c__unclassified;o__unclassified;f__unclassified;g__unclassified;s__unclassified
OTU22	155	1	0	1	0	0	0	0	0	0	d__unclassified;k__unclassified;p__unclassified;c__unclassified;o__unclassified;f__unclassified;g__unclassified;s__unclassified
OTU23	22	2	0	0	1	0	0	0	0	0	d__unclassified;k__unclassified;p__unclassified;c__unclassified;o__unclassified;f__unclassified;g__unclassified;s__unclassified
OTU24	2	1	0	0	2	1	0	0	0	0	d__Bacteria;k__unclassified_d__Bacteria;p__Proteobacteria;c__Alphaproteobacteria;o__Rhodobacterales;f__Hyphomonadaceae;g__Maricaulis;s__Maricaulis_maris
OTU25	41	7	0	4	73	6	0	0	0	0	d__unclassified;k__unclassified;p__unclassified;c__unclassified;o__unclassified;f__unclassified;g__unclassified;s__unclassified
OTU26	3	0	0	0	0	0	0	0	0	0	d__Bacteria;k__unclassified_d__Bacteria;p__Actinobacteria_d__Bacteria;c__Actinobacteria_p__Actinobacteria;o__Micrococcales;f__Microbacteriaceae;g__Curtobacterium;s__Curtobacterium_sp._BH-2-1-1
OTU27	47	20	0	4	1	0	0	0	0	0	d__unclassified;k__unclassified;p__unclassified;c__unclassified;o__unclassified;f__unclassified;g__unclassified;s__unclassified
OTU28	69	10	0	0	18	89	0	0	0	0	d__Bacteria;k__unclassified_d__Bacteria;p__Proteobacteria;c__Deltaproteobacteria;o__Myxococcales;f__Myxococcaceae;g__Myxococcus;s__Myxococcus_hansupus
OTU29	39	0	0	2	1	0	0	0	0	0	d__unclassified;k__unclassified;p__unclassified;c__unclassified;o__unclassified;f__unclassified;g__unclassified;s__unclassified
OTU30	34	7	0	9	0	0	2	16	0	0	d__unclassified;k__unclassified;p__unclassified;c__unclassified;o__unclassified;f__unclassified;g__unclassified;s__unclassified
OTU31	47	17	0	6	7	0	0	0	0	0	d__unclassified;k__unclassified;p__unclassified;c__unclassified;o__unclassified;f__unclassified;g__unclassified;s__unclassified
OTU32	87	0	0	0	0	0	0	0	0	0	d__unclassified;k__unclassified;p__unclassified;c__unclassified;o__unclassified;f__unclassified;g__unclassified;s__unclassified
OTU33	3	2	0	1	4	0	0	0	0	0	d__unclassified;k__unclassified;p__unclassified;c__unclassified;o__unclassified;f__unclassified;g__unclassified;s__unclassified
OTU34	3	0	0	3	0	0	0	0	0	0	d__Bacteria;k__unclassified_d__Bacteria;p__Proteobacteria;c__Alphaproteobacteria;o__Rhodobacterales;f__Rhodobacteraceae;g__Paracoccus_f__Rhodobacteraceae;s__Paracoccus_yeei
OTU35	9	2	0	1	0	0	0	0	0	0	d__Bacteria;k__unclassified_d__Bacteria;p__Proteobacteria;c__Alphaproteobacteria;o__Rhodospirillales;f__Rhodospirillaceae;g__Azospirillum;s__Azospirillum_lipoferum
OTU36	32	1	0	0	0	0	0	0	0	0	d__unclassified;k__unclassified;p__unclassified;c__unclassified;o__unclassified;f__unclassified;g__unclassified;s__unclassified
OTU37	8	0	0	0	3	0	0	0	0	0	d__unclassified;k__unclassified;p__unclassified;c__unclassified;o__unclassified;f__unclassified;g__unclassified;s__unclassified
OTU38	4	0	0	1	0	0	0	0	0	0	d__unclassified;k__unclassified;p__unclassified;c__unclassified;o__unclassified;f__unclassified;g__unclassified;s__unclassified
OTU39	3	1	0	0	0	0	0	0	0	0	d__Bacteria;k__unclassified_d__Bacteria;p__Proteobacteria;c__Gammaproteobacteria;o__Cellvibrionales;f__Halieaceae;g__Halioglobus;s__Halioglobus_pacificus
OTU40	2	0	0	0	0	0	0	0	0	0	d__unclassified;k__unclassified;p__unclassified;c__unclassified;o__unclassified;f__unclassified;g__unclassified;s__unclassified
OTU41	9	2	0	0	3	1	0	1	0	0	d__unclassified;k__unclassified;p__unclassified;c__unclassified;o__unclassified;f__unclassified;g__unclassified;s__unclassified
OTU42	30	18	0	19	7	1	0	0	0	0	d__Bacteria;k__unclassified_d__Bacteria;p__Proteobacteria;c__Alphaproteobacteria;o__Rhodobacterales;f__Rhodobacteraceae;g__Paracoccus_f__Rhodobacteraceae;s__Paracoccus_yeei
OTU43	2450	443	19	533	173	20	1	1	0	0	d__Bacteria;k__unclassified_d__Bacteria;p__Proteobacteria;c__Alphaproteobacteria;o__Rhodobacterales;f__Rhodobacteraceae;g__Leisingera;s__Leisingera_methylohalidivorans
OTU44	33	12	0	13	0	0	0	0	0	0	d__Bacteria;k__unclassified_d__Bacteria;p__Firmicutes;c__Bacilli;o__Bacillales;f__Paenibacillaceae;g__Paenibacillus;s__Paenibacillus_stellifer
OTU45	249	475	0	46	3	0	0	0	0	0	d__unclassified;k__unclassified;p__unclassified;c__unclassified;o__unclassified;f__unclassified;g__unclassified;s__unclassified
OTU46	20	0	0	1	0	0	0	0	0	0	d__unclassified;k__unclassified;p__unclassified;c__unclassified;o__unclassified;f__unclassified;g__unclassified;s__unclassified
OTU47	228	2	0	11	2	0	0	0	0	0	d__Bacteria;k__unclassified_d__Bacteria;p__Proteobacteria;c__Gammaproteobacteria;o__Pseudomonadales;f__Pseudomonadaceae;g__Pseudomonas;s__Pseudomonas_citronellolis
OTU48	68	9	4	13	5	3	0	0	0	0	d__Bacteria;k__unclassified_d__Bacteria;p__Proteobacteria;c__Alphaproteobacteria;o__Rhodobacterales;f__Rhodobacteraceae;g__Leisingera;s__Leisingera_methylohalidivorans
OTU49	327	55	1	62	27	1	0	0	0	0	d__Bacteria;k__unclassified_d__Bacteria;p__Proteobacteria;c__Alphaproteobacteria;o__Rhodobacterales;f__Rhodobacteraceae;g__Paracoccus_f__Rhodobacteraceae;s__Paracoccus_yeei
OTU50	12	2	0	0	1	0	0	0	0	0	d__Bacteria;k__unclassified_d__Bacteria;p__Proteobacteria;c__Alphaproteobacteria;o__Rhodobacterales;f__Rhodobacteraceae;g__Ruegeria;s__Ruegeria_sp._TM1040
OTU51	38	6	2	15	2	3	0	0	0	0	d__Bacteria;k__unclassified_d__Bacteria;p__Proteobacteria;c__Alphaproteobacteria;o__Rhodobacterales;f__Rhodobacteraceae;g__Paracoccus_f__Rhodobacteraceae;s__Paracoccus_yeei
OTU52	6	0	0	0	0	0	0	0	0	0	d__unclassified;k__unclassified;p__unclassified;c__unclassified;o__unclassified;f__unclassified;g__unclassified;s__unclassified
OTU53	15	2	0	0	0	0	0	0	0	0	d__unclassified;k__unclassified;p__unclassified;c__unclassified;o__unclassified;f__unclassified;g__unclassified;s__unclassified
OTU54	2	0	0	0	0	0	0	0	0	0	d__Eukaryota;k__unclassified_d__Eukaryota;p__unclassified_d__Eukaryota;c__unclassified_d__Eukaryota;o__Longamoebia;f__Acanthamoebidae;g__Acanthamoeba;s__Acanthamoeba_castellanii
OTU55	4	0	0	0	5	0	0	0	0	0	d__unclassified;k__unclassified;p__unclassified;c__unclassified;o__unclassified;f__unclassified;g__unclassified;s__unclassified
OTU56	5	16	0	29	1	0	0	0	0	0	d__unclassified;k__unclassified;p__unclassified;c__unclassified;o__unclassified;f__unclassified;g__unclassified;s__unclassified
OTU57	11	0	0	0	3	0	0	0	0	0	d__unclassified;k__unclassified;p__unclassified;c__unclassified;o__unclassified;f__unclassified;g__unclassified;s__unclassified
OTU58	11	4	0	7	9	0	0	0	0	0	d__unclassified;k__unclassified;p__unclassified;c__unclassified;o__unclassified;f__unclassified;g__unclassified;s__unclassified
OTU59	23	13	0	1	0	1	0	0	0	0	d__Bacteria;k__unclassified_d__Bacteria;p__Cyanobacteria;c__unclassified_p__Cyanobacteria;o__Synechococcales;f__Synechococcaceae;g__Synechococcus;s__Synechococcus_sp._KORDI-100
OTU60	4	0	0	0	0	0	0	0	0	0	d__unclassified;k__unclassified;p__unclassified;c__unclassified;o__unclassified;f__unclassified;g__unclassified;s__unclassified
OTU61	6	4	0	0	1	0	2	0	0	0	d__Bacteria;k__unclassified_d__Bacteria;p__Proteobacteria;c__Gammaproteobacteria;o__Pseudomonadales;f__Pseudomonadaceae;g__Pseudomonas;s__Pseudomonas_chlororaphis
OTU62	11	0	0	0	0	0	0	0	0	0	d__unclassified;k__unclassified;p__unclassified;c__unclassified;o__unclassified;f__unclassified;g__unclassified;s__unclassified
OTU63	5	1	0	2	0	0	0	0	0	0	d__Bacteria;k__unclassified_d__Bacteria;p__Proteobacteria;c__Alphaproteobacteria;o__Rhodospirillales;f__Rhodospirillaceae;g__Thalassospira;s__Thalassospira_sp._CSC3H3
OTU64	67	19	3	13	10	0	0	1	0	0	d__Bacteria;k__unclassified_d__Bacteria;p__Proteobacteria;c__Alphaproteobacteria;o__Rhodobacterales;f__Rhodobacteraceae;g__Leisingera;s__Leisingera_methylohalidivorans
OTU65	14	4	0	9	6	0	0	0	0	0	d__unclassified;k__unclassified;p__unclassified;c__unclassified;o__unclassified;f__unclassified;g__unclassified;s__unclassified
OTU66	56	2	0	1	0	0	0	0	0	0	d__Bacteria;k__unclassified_d__Bacteria;p__Proteobacteria;c__Gammaproteobacteria;o__Pseudomonadales;f__Pseudomonadaceae;g__Pseudomonas;s__Pseudomonas_asplenii
OTU67	34	15	0	13	22	14	0	0	0	0	d__Bacteria;k__unclassified_d__Bacteria;p__Proteobacteria;c__Alphaproteobacteria;o__Rhodobacterales;f__Rhodobacteraceae;g__Defluviimonas;s__Defluviimonas_alba
OTU68	1	4	0	0	0	0	0	0	0	0	d__unclassified;k__unclassified_d__unclassified;p__unclassified_d__unclassified;c__unclassified_d__unclassified;o__unclassified_d__unclassified;f__unclassified_d__unclassified;g__unclassified_d__unclassified;s__uncultured_microorganism
OTU69	160	25	0	27	8	6	0	0	0	0	d__Bacteria;k__unclassified_d__Bacteria;p__Proteobacteria;c__Alphaproteobacteria;o__Rhodobacterales;f__Rhodobacteraceae;g__Leisingera;s__Leisingera_methylohalidivorans
OTU70	10	7	1	1	0	1	0	0	0	0	d__unclassified;k__unclassified;p__unclassified;c__unclassified;o__unclassified;f__unclassified;g__unclassified;s__unclassified
OTU71	2	0	0	0	0	0	0	0	0	0	d__unclassified;k__unclassified;p__unclassified;c__unclassified;o__unclassified;f__unclassified;g__unclassified;s__unclassified
OTU72	795	154	0	205	54	8	0	0	0	0	d__Bacteria;k__unclassified_d__Bacteria;p__Proteobacteria;c__Alphaproteobacteria;o__Rhodobacterales;f__Rhodobacteraceae;g__Marinovum;s__Marinovum_algicola
OTU73	1516	228	7	331	78	23	0	0	0	0	d__Bacteria;k__unclassified_d__Bacteria;p__Proteobacteria;c__Alphaproteobacteria;o__Rhodobacterales;f__Rhodobacteraceae;g__Leisingera;s__Leisingera_methylohalidivorans
OTU74	641	79	0	104	23	5	0	0	0	0	d__unclassified;k__unclassified;p__unclassified;c__unclassified;o__unclassified;f__unclassified;g__unclassified;s__unclassified
OTU75	11	1	0	0	0	0	0	0	0	0	d__unclassified;k__unclassified;p__unclassified;c__unclassified;o__unclassified;f__unclassified;g__unclassified;s__unclassified
OTU76	130	22	2	44	8	3	0	0	0	0	d__Bacteria;k__unclassified_d__Bacteria;p__Proteobacteria;c__Alphaproteobacteria;o__Rhodobacterales;f__Rhodobacteraceae;g__Paracoccus_f__Rhodobacteraceae;s__Paracoccus_yeei
OTU77	2	0	0	0	0	0	0	0	0	0	d__unclassified;k__unclassified;p__unclassified;c__unclassified;o__unclassified;f__unclassified;g__unclassified;s__unclassified
OTU78	8	0	0	0	40	0	75	286	0	0	d__Bacteria;k__unclassified_d__Bacteria;p__unclassified_d__Bacteria;c__unclassified_d__Bacteria;o__unclassified_d__Bacteria;f__unclassified_d__Bacteria;g__unclassified_d__Bacteria;s__uncultured_nitrogen-fixing_bacterium
OTU79	9	0	0	0	0	0	0	0	0	0	d__unclassified;k__unclassified;p__unclassified;c__unclassified;o__unclassified;f__unclassified;g__unclassified;s__unclassified
OTU80	2	0	0	0	0	0	0	0	0	0	d__Bacteria;k__unclassified_d__Bacteria;p__Proteobacteria;c__Gammaproteobacteria;o__Alteromonadales;f__Alteromonadaceae;g__Marinobacter;s__Marinobacter_hydrocarbonoclasticus
OTU81	6	0	0	0	1	0	0	0	0	0	d__unclassified;k__unclassified;p__unclassified;c__unclassified;o__unclassified;f__unclassified;g__unclassified;s__unclassified
OTU82	39	2	0	0	2	0	0	0	0	0	d__unclassified;k__unclassified;p__unclassified;c__unclassified;o__unclassified;f__unclassified;g__unclassified;s__unclassified
OTU83	6	2	0	0	0	0	0	0	0	0	d__unclassified;k__unclassified;p__unclassified;c__unclassified;o__unclassified;f__unclassified;g__unclassified;s__unclassified
OTU84	7	11	0	0	0	0	0	0	0	0	d__Bacteria;k__unclassified_d__Bacteria;p__Cyanobacteria;c__unclassified_p__Cyanobacteria;o__Synechococcales;f__Synechococcaceae;g__Synechococcus;s__Synechococcus_sp._CC9605
OTU85	9	1	0	2	3	0	0	0	0	0	d__Bacteria;k__unclassified_d__Bacteria;p__Proteobacteria;c__Gammaproteobacteria;o__Alteromonadales;f__Alteromonadaceae;g__Marinobacter;s__Marinobacter_sp._CP1
OTU86	50	8	0	17	5	2	0	0	0	0	d__Bacteria;k__unclassified_d__Bacteria;p__Proteobacteria;c__Alphaproteobacteria;o__Rhodobacterales;f__Rhodobacteraceae;g__Thiobacimonas;s__Thiobacimonas_profunda
OTU87	38	1	0	1	1	0	0	0	0	0	d__unclassified;k__unclassified;p__unclassified;c__unclassified;o__unclassified;f__unclassified;g__unclassified;s__unclassified
OTU88	45	17	0	9	2	17	0	0	0	0	d__Bacteria;k__unclassified_d__Bacteria;p__Cyanobacteria;c__unclassified_p__Cyanobacteria;o__Synechococcales;f__Synechococcaceae;g__Synechococcus;s__Synechococcus_sp._CC9605
OTU89	64	0	0	4	0	1	0	0	0	0	d__unclassified;k__unclassified;p__unclassified;c__unclassified;o__unclassified;f__unclassified;g__unclassified;s__unclassified
OTU90	9	0	3	3	0	0	0	0	0	0	d__unclassified;k__unclassified;p__unclassified;c__unclassified;o__unclassified;f__unclassified;g__unclassified;s__unclassified
OTU91	15	3	0	0	0	0	0	0	0	0	d__unclassified;k__unclassified;p__unclassified;c__unclassified;o__unclassified;f__unclassified;g__unclassified;s__unclassified
OTU92	2	1	0	3	1	0	0	0	0	0	d__unclassified;k__unclassified;p__unclassified;c__unclassified;o__unclassified;f__unclassified;g__unclassified;s__unclassified
OTU93	19	14	0	16	5	0	0	0	0	0	d__unclassified;k__unclassified;p__unclassified;c__unclassified;o__unclassified;f__unclassified;g__unclassified;s__unclassified
OTU94	14	0	0	0	1	0	0	0	0	0	d__unclassified;k__unclassified;p__unclassified;c__unclassified;o__unclassified;f__unclassified;g__unclassified;s__unclassified
OTU95	134	9	0	2	10	0	0	0	0	0	d__unclassified;k__unclassified;p__unclassified;c__unclassified;o__unclassified;f__unclassified;g__unclassified;s__unclassified
OTU96	17	6	7	9	0	0	0	0	0	0	d__unclassified;k__unclassified;p__unclassified;c__unclassified;o__unclassified;f__unclassified;g__unclassified;s__unclassified
OTU97	5	0	0	0	2	0	0	2	0	0	d__unclassified;k__unclassified;p__unclassified;c__unclassified;o__unclassified;f__unclassified;g__unclassified;s__unclassified
OTU98	14	10	0	2	18	1	0	0	0	0	d__unclassified;k__unclassified;p__unclassified;c__unclassified;o__unclassified;f__unclassified;g__unclassified;s__unclassified
OTU99	0	1	139	0	0	0	0	0	0	0	d__Bacteria;k__unclassified_d__Bacteria;p__Cyanobacteria;c__unclassified_p__Cyanobacteria;o__Synechococcales;f__Synechococcaceae;g__Synechococcus;s__Synechococcus_sp._WH_8109
OTU100	9	2	0	0	0	0	0	0	0	0	d__unclassified;k__unclassified;p__unclassified;c__unclassified;o__unclassified;f__unclassified;g__unclassified;s__unclassified
OTU101	0	13	0	0	0	0	0	0	0	0	d__Bacteria;k__unclassified_d__Bacteria;p__Proteobacteria;c__Gammaproteobacteria;o__Enterobacterales;f__Enterobacteriaceae;g__Kluyvera;s__Kluyvera_intermedia
OTU102	14	12	0	2	6	2	0	0	0	0	d__unclassified;k__unclassified;p__unclassified;c__unclassified;o__unclassified;f__unclassified;g__unclassified;s__unclassified
OTU103	26	23	2	9	6	0	0	0	0	0	d__unclassified;k__unclassified;p__unclassified;c__unclassified;o__unclassified;f__unclassified;g__unclassified;s__unclassified
OTU104	6	7	0	2	21	5	0	0	0	0	d__Bacteria;k__unclassified_d__Bacteria;p__Proteobacteria;c__Alphaproteobacteria;o__Rhodobacterales;f__Rhodobacteraceae;g__Roseobacter;s__Roseobacter_litoralis
OTU105	0	5	0	2	1	0	0	0	0	0	d__Bacteria;k__unclassified_d__Bacteria;p__Cyanobacteria;c__unclassified_p__Cyanobacteria;o__Synechococcales;f__Synechococcaceae;g__Synechococcus;s__Synechococcus_sp._WH_8103
OTU106	10	20	0	19	8	1	0	0	0	0	d__unclassified;k__unclassified;p__unclassified;c__unclassified;o__unclassified;f__unclassified;g__unclassified;s__unclassified
OTU107	201	48	2	12	38	1	0	0	0	0	d__unclassified;k__unclassified;p__unclassified;c__unclassified;o__unclassified;f__unclassified;g__unclassified;s__unclassified
OTU108	0	10	0	0	0	0	0	0	0	0	d__Bacteria;k__unclassified_d__Bacteria;p__Proteobacteria;c__Betaproteobacteria;o__Rhodocyclales;f__Rhodocyclaceae;g__Azospira;s__Azospira_oryzae
OTU109	0	8	0	8	0	0	0	0	0	0	d__unclassified;k__unclassified;p__unclassified;c__unclassified;o__unclassified;f__unclassified;g__unclassified;s__unclassified
OTU110	0	15	0	9	2	1	0	0	0	0	d__unclassified;k__unclassified;p__unclassified;c__unclassified;o__unclassified;f__unclassified;g__unclassified;s__unclassified
OTU111	171	89	1	9	7	0	0	0	0	0	d__Bacteria;k__unclassified_d__Bacteria;p__Cyanobacteria;c__unclassified_p__Cyanobacteria;o__Synechococcales;f__Synechococcaceae;g__Synechococcus;s__Synechococcus_sp._KORDI-100
OTU112	1	4	1	5	2	0	0	0	0	0	d__Bacteria;k__unclassified_d__Bacteria;p__Cyanobacteria;c__unclassified_p__Cyanobacteria;o__Synechococcales;f__Synechococcaceae;g__Synechococcus;s__Synechococcus_sp._WH_8103
OTU113	12	14	0	11	2	0	0	0	0	0	d__Bacteria;k__unclassified_d__Bacteria;p__Cyanobacteria;c__unclassified_p__Cyanobacteria;o__Synechococcales;f__Synechococcaceae;g__Synechococcus;s__Synechococcus_sp._WH_8103
OTU114	0	2	0	0	0	0	0	0	0	0	d__unclassified;k__unclassified;p__unclassified;c__unclassified;o__unclassified;f__unclassified;g__unclassified;s__unclassified
OTU115	0	3	0	0	0	0	0	0	0	0	d__unclassified;k__unclassified;p__unclassified;c__unclassified;o__unclassified;f__unclassified;g__unclassified;s__unclassified
OTU116	2	18	0	0	11	1	0	0	0	0	d__Bacteria;k__unclassified_d__Bacteria;p__Proteobacteria;c__Alphaproteobacteria;o__Rhizobiales;f__Xanthobacteraceae;g__Azorhizobium;s__Azorhizobium_caulinodans
OTU117	0	12	0	4	0	0	2	2	4	0	d__unclassified;k__unclassified;p__unclassified;c__unclassified;o__unclassified;f__unclassified;g__unclassified;s__unclassified
OTU118	385	140	2	28	13	54	0	0	0	0	d__Bacteria;k__unclassified_d__Bacteria;p__Cyanobacteria;c__unclassified_p__Cyanobacteria;o__Synechococcales;f__Synechococcaceae;g__Synechococcus;s__Synechococcus_sp._CC9605
OTU119	0	12	0	0	0	0	0	0	0	0	d__unclassified;k__unclassified_d__unclassified;p__unclassified_d__unclassified;c__unclassified_d__unclassified;o__unclassified_d__unclassified;f__unclassified_d__unclassified;g__unclassified_d__unclassified;s__uncultured_microorganism
OTU120	76	68	2	38	30	2	0	0	0	5	d__unclassified;k__unclassified;p__unclassified;c__unclassified;o__unclassified;f__unclassified;g__unclassified;s__unclassified
OTU121	0	31	0	0	0	0	0	0	0	0	d__Bacteria;k__unclassified_d__Bacteria;p__unclassified_d__Bacteria;c__unclassified_d__Bacteria;o__unclassified_d__Bacteria;f__unclassified_d__Bacteria;g__unclassified_d__Bacteria;s__uncultured_bacterium
OTU122	4	1	0	2	0	0	0	0	0	0	d__unclassified;k__unclassified;p__unclassified;c__unclassified;o__unclassified;f__unclassified;g__unclassified;s__unclassified
OTU123	9	9	0	1	2	0	0	0	0	0	d__unclassified;k__unclassified;p__unclassified;c__unclassified;o__unclassified;f__unclassified;g__unclassified;s__unclassified
OTU124	1730	2918	19	1636	2459	1518	5	1	116	1	d__Bacteria;k__unclassified_d__Bacteria;p__Proteobacteria;c__Alphaproteobacteria;o__Rhodobacterales;f__Rhodobacteraceae;g__Phaeobacter;s__Phaeobacter_gallaeciensis
OTU125	0	24	0	2	1	0	0	0	0	0	d__unclassified;k__unclassified;p__unclassified;c__unclassified;o__unclassified;f__unclassified;g__unclassified;s__unclassified
OTU126	38	11	0	5	78	1	0	0	0	0	d__unclassified;k__unclassified;p__unclassified;c__unclassified;o__unclassified;f__unclassified;g__unclassified;s__unclassified
OTU127	8	16	0	3	4	0	0	0	0	0	d__unclassified;k__unclassified;p__unclassified;c__unclassified;o__unclassified;f__unclassified;g__unclassified;s__unclassified
OTU128	5	3	0	0	2	0	0	0	0	0	d__Bacteria;k__unclassified_d__Bacteria;p__Cyanobacteria;c__unclassified_p__Cyanobacteria;o__unclassified_p__Cyanobacteria;f__unclassified_p__Cyanobacteria;g__unclassified_p__Cyanobacteria;s__uncultured_cyanobacterium
OTU129	1	1	0	2	0	0	0	0	0	0	d__unclassified;k__unclassified;p__unclassified;c__unclassified;o__unclassified;f__unclassified;g__unclassified;s__unclassified
OTU130	13	2	0	1	1	0	0	0	0	0	d__Bacteria;k__unclassified_d__Bacteria;p__Actinobacteria_d__Bacteria;c__Actinobacteria_p__Actinobacteria;o__Propionibacteriales;f__Nocardioidaceae;g__Aeromicrobium;s__Aeromicrobium_erythreum
OTU131	0	67	0	0	3	6	0	0	0	0	d__Bacteria;k__unclassified_d__Bacteria;p__unclassified_d__Bacteria;c__unclassified_d__Bacteria;o__unclassified_d__Bacteria;f__unclassified_d__Bacteria;g__unclassified_d__Bacteria;s__uncultured_bacterium
OTU132	0	5	0	1	2	0	0	0	0	0	d__unclassified;k__unclassified;p__unclassified;c__unclassified;o__unclassified;f__unclassified;g__unclassified;s__unclassified
OTU133	2	7	0	0	6	0	0	0	0	0	d__Bacteria;k__unclassified_d__Bacteria;p__Proteobacteria;c__Alphaproteobacteria;o__Sphingomonadales;f__Sphingomonadaceae;g__Citromicrobium;s__Citromicrobium_sp._JL477
OTU134	401	72	34	128	17	8	0	0	0	0	d__Bacteria;k__unclassified_d__Bacteria;p__Proteobacteria;c__Alphaproteobacteria;o__Rhodobacterales;f__Rhodobacteraceae;g__Leisingera;s__Leisingera_methylohalidivorans
OTU135	85	63	48	40	7	2	0	0	0	0	d__Bacteria;k__unclassified_d__Bacteria;p__Proteobacteria;c__Alphaproteobacteria;o__Rhodobacterales;f__Rhodobacteraceae;g__Marinovum;s__Marinovum_algicola
OTU136	0	4	0	4	1	0	0	0	0	0	d__unclassified;k__unclassified;p__unclassified;c__unclassified;o__unclassified;f__unclassified;g__unclassified;s__unclassified
OTU137	11	45	0	58	1	9	0	0	0	0	d__Bacteria;k__unclassified_d__Bacteria;p__unclassified_d__Bacteria;c__unclassified_d__Bacteria;o__unclassified_d__Bacteria;f__unclassified_d__Bacteria;g__unclassified_d__Bacteria;s__uncultured_bacterium
OTU138	2	2	0	10	1	0	0	0	0	0	d__unclassified;k__unclassified;p__unclassified;c__unclassified;o__unclassified;f__unclassified;g__unclassified;s__unclassified
OTU139	4	13	0	132	0	8	0	0	0	0	d__Bacteria;k__unclassified_d__Bacteria;p__Cyanobacteria;c__unclassified_p__Cyanobacteria;o__Oscillatoriales;f__Microcoleaceae;g__Trichodesmium;s__Trichodesmium_erythraeum
OTU140	4	1	0	17	3	1	0	0	0	0	d__unclassified;k__unclassified;p__unclassified;c__unclassified;o__unclassified;f__unclassified;g__unclassified;s__unclassified
OTU141	7	2	0	11	0	0	1	0	0	0	d__Bacteria;k__unclassified_d__Bacteria;p__Proteobacteria;c__Alphaproteobacteria;o__Rhodobacterales;f__Hyphomonadaceae;g__Hyphomonas;s__Hyphomonas_sp._Mor2
OTU142	0	4	0	13	1	0	0	0	0	0	d__unclassified;k__unclassified;p__unclassified;c__unclassified;o__unclassified;f__unclassified;g__unclassified;s__unclassified
OTU143	0	0	0	12	0	2	0	0	0	0	d__Bacteria;k__unclassified_d__Bacteria;p__Proteobacteria;c__Alphaproteobacteria;o__Rhizobiales;f__Chelatococcaceae;g__Chelatococcus;s__Chelatococcus_sp._CO-6
OTU144	4	2	0	11	5	1	0	0	0	0	d__unclassified;k__unclassified;p__unclassified;c__unclassified;o__unclassified;f__unclassified;g__unclassified;s__unclassified
OTU145	0	1	0	19	0	0	0	0	0	0	d__Bacteria;k__unclassified_d__Bacteria;p__unclassified_d__Bacteria;c__unclassified_d__Bacteria;o__unclassified_d__Bacteria;f__unclassified_d__Bacteria;g__unclassified_d__Bacteria;s__uncultured_bacterium
OTU146	0	0	0	10	0	0	0	0	0	0	d__Bacteria;k__unclassified_d__Bacteria;p__Proteobacteria;c__Gammaproteobacteria;o__Enterobacterales;f__Enterobacteriaceae;g__Klebsiella;s__Klebsiella_pneumoniae
OTU147	4	11	0	125	7	7	0	0	0	0	d__Bacteria;k__unclassified_d__Bacteria;p__Proteobacteria;c__Gammaproteobacteria;o__Cellvibrionales;f__Cellvibrionaceae;g__Teredinibacter;s__Teredinibacter_turnerae
OTU148	2	15	0	1	1	0	0	0	0	0	d__unclassified;k__unclassified;p__unclassified;c__unclassified;o__unclassified;f__unclassified;g__unclassified;s__unclassified
OTU149	0	1	0	1	0	0	0	0	0	0	d__unclassified;k__unclassified;p__unclassified;c__unclassified;o__unclassified;f__unclassified;g__unclassified;s__unclassified
OTU150	24	78	0	341	38	0	0	0	0	0	d__Bacteria;k__unclassified_d__Bacteria;p__Proteobacteria;c__Gammaproteobacteria;o__Chromatiales;f__Chromatiaceae;g__unclassified_f__Chromatiaceae;s__Chromatiaceae_bacterium_2141T.STBD.0c.01a
OTU151	42	0	0	118	0	0	0	0	0	0	d__Bacteria;k__unclassified_d__Bacteria;p__unclassified_d__Bacteria;c__unclassified_d__Bacteria;o__unclassified_d__Bacteria;f__unclassified_d__Bacteria;g__unclassified_d__Bacteria;s__uncultured_bacterium
OTU152	0	32	0	9	0	34	0	0	0	0	d__Bacteria;k__unclassified_d__Bacteria;p__unclassified_d__Bacteria;c__unclassified_d__Bacteria;o__unclassified_d__Bacteria;f__unclassified_d__Bacteria;g__unclassified_d__Bacteria;s__uncultured_bacterium
OTU153	0	0	0	3	0	0	0	0	0	0	d__unclassified;k__unclassified;p__unclassified;c__unclassified;o__unclassified;f__unclassified;g__unclassified;s__unclassified
OTU154	1	1	0	18	0	0	0	0	0	0	d__unclassified;k__unclassified;p__unclassified;c__unclassified;o__unclassified;f__unclassified;g__unclassified;s__unclassified
OTU155	0	0	0	5	2	0	0	0	0	0	d__unclassified;k__unclassified;p__unclassified;c__unclassified;o__unclassified;f__unclassified;g__unclassified;s__unclassified
OTU156	0	0	0	22	17	0	0	0	0	0	d__Bacteria;k__unclassified_d__Bacteria;p__Proteobacteria;c__Betaproteobacteria;o__Rhodocyclales;f__Rhodocyclaceae;g__Azospira;s__Azospira_oryzae
OTU157	0	0	0	9	0	0	0	0	0	0	d__Viruses;k__unclassified_d__Viruses;p__unclassified_d__Viruses;c__unclassified_d__Viruses;o__Caudovirales;f__Myoviridae;g__T4virus;s__Prochlorococcus_phage_P-SSM2
OTU158	0	5	0	24	0	0	0	0	0	0	d__unclassified;k__unclassified;p__unclassified;c__unclassified;o__unclassified;f__unclassified;g__unclassified;s__unclassified
OTU159	1	0	0	13	0	0	0	0	0	0	d__Bacteria;k__unclassified_d__Bacteria;p__unclassified_d__Bacteria;c__unclassified_d__Bacteria;o__unclassified_d__Bacteria;f__unclassified_d__Bacteria;g__unclassified_d__Bacteria;s__uncultured_nitrogen-fixing_bacterium
OTU160	3	1	0	10	0	0	0	0	0	0	d__Bacteria;k__unclassified_d__Bacteria;p__Proteobacteria;c__Deltaproteobacteria;o__Myxococcales;f__Archangiaceae;g__Cystobacter;s__Cystobacter_fuscus
OTU161	8	7	0	23	1	1	0	0	0	0	d__Bacteria;k__unclassified_d__Bacteria;p__Cyanobacteria;c__unclassified_p__Cyanobacteria;o__Synechococcales;f__Synechococcaceae;g__Synechococcus;s__Synechococcus_sp._WH_8109
OTU162	0	0	0	4	0	0	0	0	0	0	d__Bacteria;k__unclassified_d__Bacteria;p__Proteobacteria;c__Gammaproteobacteria;o__Oceanospirillales;f__Kangiellaceae;g__Kangiella;s__Kangiella_profundi
OTU163	94	51	1	28	17	1	0	0	0	0	d__Bacteria;k__unclassified_d__Bacteria;p__Proteobacteria;c__Alphaproteobacteria;o__Rhizobiales;f__Bradyrhizobiaceae;g__Bradyrhizobium;s__Bradyrhizobium_sp._ORS_278
OTU164	0	0	0	8	0	0	0	0	0	0	d__unclassified;k__unclassified;p__unclassified;c__unclassified;o__unclassified;f__unclassified;g__unclassified;s__unclassified
OTU165	0	2	0	4	0	0	0	1	0	0	d__unclassified;k__unclassified;p__unclassified;c__unclassified;o__unclassified;f__unclassified;g__unclassified;s__unclassified
OTU166	38	10	341	93	15	1	0	3	0	0	d__unclassified;k__unclassified;p__unclassified;c__unclassified;o__unclassified;f__unclassified;g__unclassified;s__unclassified
OTU167	3	23	0	12	8	0	0	0	0	0	d__unclassified;k__unclassified;p__unclassified;c__unclassified;o__unclassified;f__unclassified;g__unclassified;s__unclassified
OTU168	0	0	0	3	0	0	0	0	0	0	d__unclassified;k__unclassified;p__unclassified;c__unclassified;o__unclassified;f__unclassified;g__unclassified;s__unclassified
OTU169	1	0	5	7	1	0	0	0	0	0	d__unclassified;k__unclassified;p__unclassified;c__unclassified;o__unclassified;f__unclassified;g__unclassified;s__unclassified
OTU170	0	19	0	10	0	0	0	0	0	0	d__Bacteria;k__unclassified_d__Bacteria;p__unclassified_d__Bacteria;c__unclassified_d__Bacteria;o__unclassified_d__Bacteria;f__unclassified_d__Bacteria;g__unclassified_d__Bacteria;s__uncultured_bacterium
OTU171	3	14	0	19	1	1	0	0	0	0	d__Bacteria;k__unclassified_d__Bacteria;p__Proteobacteria;c__Gammaproteobacteria;o__Pseudomonadales;f__Pseudomonadaceae;g__Pseudomonas;s__Pseudomonas_stutzeri
OTU172	0	9	0	77	0	8	0	0	0	0	d__Bacteria;k__unclassified_d__Bacteria;p__unclassified_d__Bacteria;c__unclassified_d__Bacteria;o__unclassified_d__Bacteria;f__unclassified_d__Bacteria;g__unclassified_d__Bacteria;s__uncultured_soil_bacterium
OTU173	0	5	0	4	1	0	0	0	0	0	d__Bacteria;k__unclassified_d__Bacteria;p__Cyanobacteria;c__unclassified_p__Cyanobacteria;o__Synechococcales;f__Synechococcaceae;g__Synechococcus;s__Synechococcus_sp._WH_8103
OTU174	0	2	2	3	0	0	0	0	0	0	d__unclassified;k__unclassified;p__unclassified;c__unclassified;o__unclassified;f__unclassified;g__unclassified;s__unclassified
OTU175	0	0	0	15	0	0	0	0	0	0	d__Bacteria;k__unclassified_d__Bacteria;p__Proteobacteria;c__Betaproteobacteria;o__Rhodocyclales;f__Rhodocyclaceae;g__Azospira;s__Azospira_oryzae
OTU176	0	0	0	23	5	1	8	13	0	0	d__Bacteria;k__unclassified_d__Bacteria;p__Proteobacteria;c__Alphaproteobacteria;o__Rhizobiales;f__Bradyrhizobiaceae;g__Bradyrhizobium;s__Bradyrhizobium_japonicum
OTU177	0	2	0	4	3	0	0	0	0	0	d__Bacteria;k__unclassified_d__Bacteria;p__Actinobacteria_d__Bacteria;c__Actinobacteria_p__Actinobacteria;o__Micrococcales;f__Microbacteriaceae;g__Leifsonia;s__Leifsonia_xyli
OTU178	405	229	11	221	44	12	0	0	0	0	d__Bacteria;k__unclassified_d__Bacteria;p__Proteobacteria;c__Alphaproteobacteria;o__Rhodobacterales;f__Rhodobacteraceae;g__Marinovum;s__Marinovum_algicola
OTU179	139	110	76	568	3	6	0	0	97	0	d__Bacteria;k__unclassified_d__Bacteria;p__unclassified_d__Bacteria;c__unclassified_d__Bacteria;o__unclassified_d__Bacteria;f__unclassified_d__Bacteria;g__unclassified_d__Bacteria;s__uncultured_bacterium
OTU180	1	9	0	49	7	1	0	0	0	0	d__unclassified;k__unclassified_d__unclassified;p__unclassified_d__unclassified;c__unclassified_d__unclassified;o__unclassified_d__unclassified;f__unclassified_d__unclassified;g__unclassified_d__unclassified;s__uncultured_microorganism
OTU181	7	0	9	5	3	0	0	0	0	0	d__unclassified;k__unclassified;p__unclassified;c__unclassified;o__unclassified;f__unclassified;g__unclassified;s__unclassified
OTU182	3	2	0	18	2	5	0	0	0	0	d__unclassified;k__unclassified;p__unclassified;c__unclassified;o__unclassified;f__unclassified;g__unclassified;s__unclassified
OTU183	0	1	0	5	0	0	0	4	51	0	d__Bacteria;k__unclassified_d__Bacteria;p__Proteobacteria;c__Betaproteobacteria;o__Burkholderiales;f__Burkholderiaceae;g__Paraburkholderia;s__Paraburkholderia_ferrariae
OTU184	0	38	0	13	5	0	0	0	0	0	d__Bacteria;k__unclassified_d__Bacteria;p__unclassified_d__Bacteria;c__unclassified_d__Bacteria;o__unclassified_d__Bacteria;f__unclassified_d__Bacteria;g__unclassified_d__Bacteria;s__uncultured_bacterium
OTU185	0	0	0	13	0	0	0	0	0	0	d__Bacteria;k__unclassified_d__Bacteria;p__Proteobacteria;c__Betaproteobacteria;o__Rhodocyclales;f__Rhodocyclaceae;g__Azospira;s__Azospira_oryzae
OTU186	0	0	0	14	0	27	0	0	0	0	d__Bacteria;k__unclassified_d__Bacteria;p__unclassified_d__Bacteria;c__unclassified_d__Bacteria;o__unclassified_d__Bacteria;f__unclassified_d__Bacteria;g__unclassified_d__Bacteria;s__uncultured_marine_bacterium
OTU187	88	98	0	213	10	0	0	0	0	0	d__unclassified;k__unclassified;p__unclassified;c__unclassified;o__unclassified;f__unclassified;g__unclassified;s__unclassified
OTU188	0	0	0	8	0	0	0	0	0	0	d__Bacteria;k__unclassified_d__Bacteria;p__unclassified_d__Bacteria;c__unclassified_d__Bacteria;o__unclassified_d__Bacteria;f__unclassified_d__Bacteria;g__unclassified_d__Bacteria;s__uncultured_bacterium
OTU189	0	0	7	2	0	0	0	3	0	0	d__unclassified;k__unclassified;p__unclassified;c__unclassified;o__unclassified;f__unclassified;g__unclassified;s__unclassified
OTU190	0	0	0	5	0	0	0	0	0	0	d__Bacteria;k__unclassified_d__Bacteria;p__Cyanobacteria;c__unclassified_p__Cyanobacteria;o__Synechococcales;f__Synechococcaceae;g__Synechococcus;s__Synechococcus_sp._WH_8109
OTU191	33	13	0	7	1	4	0	0	0	0	d__Bacteria;k__unclassified_d__Bacteria;p__Cyanobacteria;c__unclassified_p__Cyanobacteria;o__Synechococcales;f__Synechococcaceae;g__Synechococcus;s__Synechococcus_sp._WH_8109
OTU192	2	0	0	3	0	0	0	0	21	0	d__Bacteria;k__unclassified_d__Bacteria;p__Proteobacteria;c__Alphaproteobacteria;o__Rhizobiales;f__Bradyrhizobiaceae;g__Bradyrhizobium;s__Bradyrhizobium_sp._Z15
OTU193	1	2	0	7	4	0	0	0	0	0	d__Bacteria;k__unclassified_d__Bacteria;p__Proteobacteria;c__Gammaproteobacteria;o__Acidiferrobacterales;f__Acidiferrobacteraceae;g__Sulfurifustis;s__Sulfurifustis_variabilis
OTU194	8	24	0	21	11	1	0	1	0	0	d__unclassified;k__unclassified;p__unclassified;c__unclassified;o__unclassified;f__unclassified;g__unclassified;s__unclassified
OTU195	0	4	0	16	0	0	0	0	0	0	d__Bacteria;k__unclassified_d__Bacteria;p__unclassified_d__Bacteria;c__unclassified_d__Bacteria;o__unclassified_d__Bacteria;f__unclassified_d__Bacteria;g__unclassified_d__Bacteria;s__uncultured_bacterium
OTU196	0	2	0	22	1	0	0	0	0	0	d__Bacteria;k__unclassified_d__Bacteria;p__Proteobacteria;c__Gammaproteobacteria;o__Cellvibrionales;f__Cellvibrionaceae;g__Teredinibacter;s__Teredinibacter_turnerae
OTU197	8	1	0	4	3	0	0	0	0	0	d__unclassified;k__unclassified;p__unclassified;c__unclassified;o__unclassified;f__unclassified;g__unclassified;s__unclassified
OTU198	2	4	0	15	4	0	0	0	0	0	d__unclassified;k__unclassified;p__unclassified;c__unclassified;o__unclassified;f__unclassified;g__unclassified;s__unclassified
OTU199	0	0	0	2	0	0	0	0	0	0	d__unclassified;k__unclassified;p__unclassified;c__unclassified;o__unclassified;f__unclassified;g__unclassified;s__unclassified
OTU200	29	5	0	30	3	1	0	0	0	0	d__unclassified;k__unclassified;p__unclassified;c__unclassified;o__unclassified;f__unclassified;g__unclassified;s__unclassified
OTU201	16	11	0	175	3	0	0	0	0	0	d__Bacteria;k__unclassified_d__Bacteria;p__Proteobacteria;c__Gammaproteobacteria;o__Oceanospirillales;f__Kangiellaceae;g__Kangiella;s__Kangiella_profundi
OTU202	0	0	0	0	0	0	0	0	0	18	d__unclassified;k__unclassified;p__unclassified;c__unclassified;o__unclassified;f__unclassified;g__unclassified;s__unclassified
OTU203	0	0	0	0	0	0	0	0	0	14	d__unclassified;k__unclassified;p__unclassified;c__unclassified;o__unclassified;f__unclassified;g__unclassified;s__unclassified
OTU204	0	0	0	0	0	0	0	0	0	44	d__unclassified;k__unclassified;p__unclassified;c__unclassified;o__unclassified;f__unclassified;g__unclassified;s__unclassified
OTU205	0	0	0	0	0	0	0	0	0	15	d__unclassified;k__unclassified;p__unclassified;c__unclassified;o__unclassified;f__unclassified;g__unclassified;s__unclassified
OTU206	0	0	0	0	0	0	59	0	0	94	d__unclassified;k__unclassified;p__unclassified;c__unclassified;o__unclassified;f__unclassified;g__unclassified;s__unclassified
OTU207	0	0	0	0	0	0	8	0	6	33	d__unclassified;k__unclassified;p__unclassified;c__unclassified;o__unclassified;f__unclassified;g__unclassified;s__unclassified
OTU208	0	0	0	0	0	0	0	0	0	4	d__unclassified;k__unclassified_d__unclassified;p__unclassified_d__unclassified;c__unclassified_d__unclassified;o__unclassified_d__unclassified;f__unclassified_d__unclassified;g__unclassified_d__unclassified;s__uncultured_microorganism
OTU209	0	0	0	0	0	0	1	0	0	17	d__unclassified;k__unclassified;p__unclassified;c__unclassified;o__unclassified;f__unclassified;g__unclassified;s__unclassified
OTU210	0	0	0	0	0	0	0	0	0	10	d__unclassified;k__unclassified;p__unclassified;c__unclassified;o__unclassified;f__unclassified;g__unclassified;s__unclassified
OTU211	0	0	0	0	0	0	1	0	0	16	d__unclassified;k__unclassified;p__unclassified;c__unclassified;o__unclassified;f__unclassified;g__unclassified;s__unclassified
OTU212	0	0	0	0	0	0	25	0	0	96	d__unclassified;k__unclassified;p__unclassified;c__unclassified;o__unclassified;f__unclassified;g__unclassified;s__unclassified
OTU213	0	0	0	0	0	0	4	0	0	64	d__unclassified;k__unclassified;p__unclassified;c__unclassified;o__unclassified;f__unclassified;g__unclassified;s__unclassified
OTU214	0	0	0	0	0	0	0	0	0	18	d__unclassified;k__unclassified;p__unclassified;c__unclassified;o__unclassified;f__unclassified;g__unclassified;s__unclassified
OTU215	0	0	0	0	0	0	11	0	0	95	d__unclassified;k__unclassified_d__unclassified;p__unclassified_d__unclassified;c__unclassified_d__unclassified;o__unclassified_d__unclassified;f__unclassified_d__unclassified;g__unclassified_d__unclassified;s__uncultured_microorganism
OTU216	0	0	0	0	0	0	0	0	0	9	d__unclassified;k__unclassified;p__unclassified;c__unclassified;o__unclassified;f__unclassified;g__unclassified;s__unclassified
OTU217	0	0	0	0	0	0	8	0	0	8	d__unclassified;k__unclassified;p__unclassified;c__unclassified;o__unclassified;f__unclassified;g__unclassified;s__unclassified
OTU218	0	0	0	0	0	0	0	0	0	25	d__unclassified;k__unclassified;p__unclassified;c__unclassified;o__unclassified;f__unclassified;g__unclassified;s__unclassified
OTU219	0	0	0	0	0	0	0	0	0	13	d__unclassified;k__unclassified;p__unclassified;c__unclassified;o__unclassified;f__unclassified;g__unclassified;s__unclassified
OTU220	0	0	0	0	0	0	1	0	0	38	d__Bacteria;k__unclassified_d__Bacteria;p__unclassified_d__Bacteria;c__unclassified_d__Bacteria;o__unclassified_d__Bacteria;f__unclassified_d__Bacteria;g__unclassified_d__Bacteria;s__uncultured_bacterium
OTU221	0	0	0	0	0	0	0	0	0	19	d__unclassified;k__unclassified;p__unclassified;c__unclassified;o__unclassified;f__unclassified;g__unclassified;s__unclassified
OTU222	0	0	0	0	0	0	2	0	0	7	d__unclassified;k__unclassified;p__unclassified;c__unclassified;o__unclassified;f__unclassified;g__unclassified;s__unclassified
OTU223	0	0	0	0	0	0	0	0	0	52	d__unclassified;k__unclassified;p__unclassified;c__unclassified;o__unclassified;f__unclassified;g__unclassified;s__unclassified
OTU224	0	0	0	0	0	0	0	0	0	18	d__unclassified;k__unclassified;p__unclassified;c__unclassified;o__unclassified;f__unclassified;g__unclassified;s__unclassified
OTU225	0	0	0	0	0	0	0	0	0	8	d__unclassified;k__unclassified;p__unclassified;c__unclassified;o__unclassified;f__unclassified;g__unclassified;s__unclassified
OTU226	0	0	0	0	0	0	0	0	0	12	d__unclassified;k__unclassified;p__unclassified;c__unclassified;o__unclassified;f__unclassified;g__unclassified;s__unclassified
OTU227	0	0	0	0	0	0	0	0	0	14	d__Bacteria;k__unclassified_d__Bacteria;p__unclassified_d__Bacteria;c__unclassified_d__Bacteria;o__unclassified_d__Bacteria;f__unclassified_d__Bacteria;g__unclassified_d__Bacteria;s__uncultured_nitrogen-fixing_bacterium
OTU228	0	0	8	0	0	1	0	0	0	62	d__Bacteria;k__unclassified_d__Bacteria;p__Actinobacteria_d__Bacteria;c__Actinobacteria_p__Actinobacteria;o__Corynebacteriales;f__Mycobacteriaceae;g__Mycobacterium;s__Mycobacterium_abscessus
OTU229	0	0	0	0	0	0	0	0	0	112	d__unclassified;k__unclassified;p__unclassified;c__unclassified;o__unclassified;f__unclassified;g__unclassified;s__unclassified
OTU230	0	0	0	0	0	0	13	0	0	86	d__unclassified;k__unclassified;p__unclassified;c__unclassified;o__unclassified;f__unclassified;g__unclassified;s__unclassified
OTU231	0	0	0	0	0	0	0	0	0	36	d__unclassified;k__unclassified;p__unclassified;c__unclassified;o__unclassified;f__unclassified;g__unclassified;s__unclassified
OTU232	0	0	0	0	0	0	0	0	0	4	d__unclassified;k__unclassified;p__unclassified;c__unclassified;o__unclassified;f__unclassified;g__unclassified;s__unclassified
OTU233	0	0	0	0	0	0	0	0	0	27	d__Bacteria;k__unclassified_d__Bacteria;p__unclassified_d__Bacteria;c__unclassified_d__Bacteria;o__unclassified_d__Bacteria;f__unclassified_d__Bacteria;g__unclassified_d__Bacteria;s__uncultured_bacterium
OTU234	0	0	0	0	0	0	23	0	0	36	d__unclassified;k__unclassified;p__unclassified;c__unclassified;o__unclassified;f__unclassified;g__unclassified;s__unclassified
OTU235	0	0	0	0	0	0	0	0	0	8	d__unclassified;k__unclassified;p__unclassified;c__unclassified;o__unclassified;f__unclassified;g__unclassified;s__unclassified
OTU236	0	0	0	0	0	0	0	0	3	3	d__unclassified;k__unclassified;p__unclassified;c__unclassified;o__unclassified;f__unclassified;g__unclassified;s__unclassified
OTU237	0	0	0	0	0	0	0	0	0	44	d__Bacteria;k__unclassified_d__Bacteria;p__unclassified_d__Bacteria;c__unclassified_d__Bacteria;o__unclassified_d__Bacteria;f__unclassified_d__Bacteria;g__unclassified_d__Bacteria;s__uncultured_bacterium
OTU238	0	0	0	0	0	0	0	0	0	4	d__unclassified;k__unclassified;p__unclassified;c__unclassified;o__unclassified;f__unclassified;g__unclassified;s__unclassified
OTU239	0	0	0	0	0	0	0	0	0	6	d__unclassified;k__unclassified;p__unclassified;c__unclassified;o__unclassified;f__unclassified;g__unclassified;s__unclassified
OTU240	0	0	0	0	0	0	0	0	0	24	d__Eukaryota;k__unclassified_d__Eukaryota;p__unclassified_d__Eukaryota;c__Pelagophyceae;o__Pelagomonadales;f__unclassified_o__Pelagomonadales;g__Aureococcus;s__Aureococcus_anophagefferens
OTU241	0	0	0	0	0	0	0	0	0	13	d__unclassified;k__unclassified;p__unclassified;c__unclassified;o__unclassified;f__unclassified;g__unclassified;s__unclassified
OTU242	0	0	0	0	0	0	0	0	0	8	d__Bacteria;k__unclassified_d__Bacteria;p__Actinobacteria_d__Bacteria;c__Actinobacteria_p__Actinobacteria;o__Pseudonocardiales;f__Pseudonocardiaceae;g__Amycolatopsis;s__Amycolatopsis_keratiniphila
OTU243	0	0	0	0	0	0	0	0	0	9	d__Eukaryota;k__Viridiplantae;p__Chlorophyta;c__Trebouxiophyceae;o__Chlorellales;f__Chlorellaceae;g__Auxenochlorella;s__Auxenochlorella_protothecoides
OTU244	0	0	0	0	0	0	8	0	0	10	d__unclassified;k__unclassified;p__unclassified;c__unclassified;o__unclassified;f__unclassified;g__unclassified;s__unclassified
OTU245	0	0	0	0	0	0	12	0	0	44	d__unclassified;k__unclassified;p__unclassified;c__unclassified;o__unclassified;f__unclassified;g__unclassified;s__unclassified
OTU246	0	0	0	0	0	0	0	0	0	3	d__unclassified;k__unclassified;p__unclassified;c__unclassified;o__unclassified;f__unclassified;g__unclassified;s__unclassified
OTU247	0	0	0	0	0	0	19	0	0	74	d__unclassified;k__unclassified;p__unclassified;c__unclassified;o__unclassified;f__unclassified;g__unclassified;s__unclassified
OTU248	0	0	0	0	0	0	0	0	0	83	d__Bacteria;k__unclassified_d__Bacteria;p__unclassified_d__Bacteria;c__unclassified_d__Bacteria;o__unclassified_d__Bacteria;f__unclassified_d__Bacteria;g__unclassified_d__Bacteria;s__uncultured_bacterium
OTU249	0	0	0	0	0	0	0	0	0	37	d__unclassified;k__unclassified;p__unclassified;c__unclassified;o__unclassified;f__unclassified;g__unclassified;s__unclassified
OTU250	0	0	0	0	0	0	0	0	0	18	d__unclassified;k__unclassified;p__unclassified;c__unclassified;o__unclassified;f__unclassified;g__unclassified;s__unclassified
OTU251	0	0	0	0	0	0	0	0	0	74	d__unclassified;k__unclassified;p__unclassified;c__unclassified;o__unclassified;f__unclassified;g__unclassified;s__unclassified
OTU252	0	0	0	0	0	0	0	0	0	198	d__Bacteria;k__unclassified_d__Bacteria;p__unclassified_d__Bacteria;c__unclassified_d__Bacteria;o__unclassified_d__Bacteria;f__unclassified_d__Bacteria;g__unclassified_d__Bacteria;s__uncultured_bacterium
OTU253	0	0	0	0	0	0	0	0	0	6	d__unclassified;k__unclassified;p__unclassified;c__unclassified;o__unclassified;f__unclassified;g__unclassified;s__unclassified
OTU254	0	0	0	0	0	0	0	0	0	39	d__unclassified;k__unclassified;p__unclassified;c__unclassified;o__unclassified;f__unclassified;g__unclassified;s__unclassified
OTU255	0	0	0	0	0	0	0	0	0	13	d__unclassified;k__unclassified;p__unclassified;c__unclassified;o__unclassified;f__unclassified;g__unclassified;s__unclassified
OTU256	0	0	0	0	0	0	0	0	0	15	d__unclassified;k__unclassified;p__unclassified;c__unclassified;o__unclassified;f__unclassified;g__unclassified;s__unclassified
OTU257	0	0	0	0	0	0	0	0	0	4	d__Bacteria;k__unclassified_d__Bacteria;p__Proteobacteria;c__Betaproteobacteria;o__Neisseriales;f__Neisseriaceae;g__Neisseria;s__Neisseria_gonorrhoeae
OTU258	0	0	0	0	0	0	4	0	0	36	d__unclassified;k__unclassified;p__unclassified;c__unclassified;o__unclassified;f__unclassified;g__unclassified;s__unclassified
OTU259	0	0	0	0	0	0	3	0	0	46	d__unclassified;k__unclassified;p__unclassified;c__unclassified;o__unclassified;f__unclassified;g__unclassified;s__unclassified
OTU260	0	0	0	0	0	0	0	0	0	59	d__Bacteria;k__unclassified_d__Bacteria;p__unclassified_d__Bacteria;c__unclassified_d__Bacteria;o__unclassified_d__Bacteria;f__unclassified_d__Bacteria;g__unclassified_d__Bacteria;s__uncultured_bacterium
OTU261	0	0	0	0	0	0	0	0	0	133	d__unclassified;k__unclassified_d__unclassified;p__unclassified_d__unclassified;c__unclassified_d__unclassified;o__unclassified_d__unclassified;f__unclassified_d__unclassified;g__unclassified_d__unclassified;s__uncultured_microorganism
OTU262	0	0	0	0	0	0	1	0	0	3	d__unclassified;k__unclassified;p__unclassified;c__unclassified;o__unclassified;f__unclassified;g__unclassified;s__unclassified
OTU263	0	0	0	0	0	0	38	0	0	32	d__unclassified;k__unclassified;p__unclassified;c__unclassified;o__unclassified;f__unclassified;g__unclassified;s__unclassified
OTU264	0	0	0	0	0	0	0	0	0	230	d__Bacteria;k__unclassified_d__Bacteria;p__unclassified_d__Bacteria;c__unclassified_d__Bacteria;o__unclassified_d__Bacteria;f__unclassified_d__Bacteria;g__unclassified_d__Bacteria;s__uncultured_bacterium
OTU265	0	0	0	0	0	0	0	0	0	6	d__unclassified;k__unclassified;p__unclassified;c__unclassified;o__unclassified;f__unclassified;g__unclassified;s__unclassified
OTU266	0	0	0	0	0	0	0	0	0	10	d__unclassified;k__unclassified;p__unclassified;c__unclassified;o__unclassified;f__unclassified;g__unclassified;s__unclassified
OTU267	0	0	0	0	0	0	0	0	0	2	d__unclassified;k__unclassified;p__unclassified;c__unclassified;o__unclassified;f__unclassified;g__unclassified;s__unclassified
OTU268	0	0	0	0	0	0	0	0	0	81	d__unclassified;k__unclassified_d__unclassified;p__unclassified_d__unclassified;c__unclassified_d__unclassified;o__unclassified_d__unclassified;f__unclassified_d__unclassified;g__unclassified_d__unclassified;s__uncultured_microorganism
OTU269	0	0	0	0	0	0	10	0	0	176	d__unclassified;k__unclassified;p__unclassified;c__unclassified;o__unclassified;f__unclassified;g__unclassified;s__unclassified
OTU270	0	0	0	0	0	0	3	0	1	13	d__unclassified;k__unclassified;p__unclassified;c__unclassified;o__unclassified;f__unclassified;g__unclassified;s__unclassified
OTU271	0	0	0	0	0	0	0	0	0	5	d__unclassified;k__unclassified;p__unclassified;c__unclassified;o__unclassified;f__unclassified;g__unclassified;s__unclassified
OTU272	0	0	0	0	0	0	5	0	2	10	d__unclassified;k__unclassified;p__unclassified;c__unclassified;o__unclassified;f__unclassified;g__unclassified;s__unclassified
OTU273	0	0	1620	4	0	0	0	98	0	115	d__unclassified;k__unclassified;p__unclassified;c__unclassified;o__unclassified;f__unclassified;g__unclassified;s__unclassified
OTU274	0	0	0	0	0	0	0	0	0	18	d__unclassified;k__unclassified;p__unclassified;c__unclassified;o__unclassified;f__unclassified;g__unclassified;s__unclassified
OTU275	0	0	0	0	0	0	0	0	0	5	d__unclassified;k__unclassified;p__unclassified;c__unclassified;o__unclassified;f__unclassified;g__unclassified;s__unclassified
OTU276	0	0	0	0	0	0	0	0	0	16	d__unclassified;k__unclassified_d__unclassified;p__unclassified_d__unclassified;c__unclassified_d__unclassified;o__unclassified_d__unclassified;f__unclassified_d__unclassified;g__unclassified_d__unclassified;s__uncultured_microorganism
OTU277	0	0	0	0	0	0	0	0	0	8	d__unclassified;k__unclassified;p__unclassified;c__unclassified;o__unclassified;f__unclassified;g__unclassified;s__unclassified
OTU278	0	0	0	0	0	0	0	0	0	52	d__Bacteria;k__unclassified_d__Bacteria;p__unclassified_d__Bacteria;c__unclassified_d__Bacteria;o__unclassified_d__Bacteria;f__unclassified_d__Bacteria;g__unclassified_d__Bacteria;s__uncultured_bacterium
OTU279	0	0	0	0	0	0	0	0	0	12	d__unclassified;k__unclassified;p__unclassified;c__unclassified;o__unclassified;f__unclassified;g__unclassified;s__unclassified
OTU280	0	0	0	0	0	0	3	0	0	52	d__unclassified;k__unclassified;p__unclassified;c__unclassified;o__unclassified;f__unclassified;g__unclassified;s__unclassified
OTU281	0	0	0	0	0	0	0	0	0	6	d__Eukaryota;k__Fungi;p__Ascomycota;c__Sordariomycetes;o__Glomerellales;f__Glomerellaceae;g__Colletotrichum;s__Colletotrichum_fioriniae
OTU282	0	0	0	0	0	0	10	0	0	29	d__unclassified;k__unclassified_d__unclassified;p__unclassified_d__unclassified;c__unclassified_d__unclassified;o__unclassified_d__unclassified;f__unclassified_d__unclassified;g__unclassified_d__unclassified;s__uncultured_microorganism
OTU283	0	0	0	0	0	0	1	0	0	9	d__Archaea;k__unclassified_d__Archaea;p__Euryarchaeota;c__unclassified_p__Euryarchaeota;o__unclassified_p__Euryarchaeota;f__unclassified_p__Euryarchaeota;g__unclassified_p__Euryarchaeota;s__uncultured_marine_group_II/III_euryarchaeote_KM3_196_G04
OTU284	0	0	0	0	0	0	0	0	0	24	d__unclassified;k__unclassified;p__unclassified;c__unclassified;o__unclassified;f__unclassified;g__unclassified;s__unclassified
OTU285	0	0	0	0	0	0	5	0	8	4	d__Bacteria;k__unclassified_d__Bacteria;p__Proteobacteria;c__Alphaproteobacteria;o__Rhizobiales;f__Rhizobiaceae;g__Rhizobium;s__Rhizobium_leguminosarum
OTU286	0	0	0	0	0	0	0	0	0	8	d__unclassified;k__unclassified;p__unclassified;c__unclassified;o__unclassified;f__unclassified;g__unclassified;s__unclassified
OTU287	0	0	0	0	0	0	0	0	0	8	d__unclassified;k__unclassified;p__unclassified;c__unclassified;o__unclassified;f__unclassified;g__unclassified;s__unclassified
OTU288	0	0	0	0	0	0	0	0	0	8	d__unclassified;k__unclassified;p__unclassified;c__unclassified;o__unclassified;f__unclassified;g__unclassified;s__unclassified
OTU289	0	0	0	0	0	0	0	0	0	5	d__unclassified;k__unclassified;p__unclassified;c__unclassified;o__unclassified;f__unclassified;g__unclassified;s__unclassified
OTU290	0	0	0	0	0	0	1	0	0	37	d__unclassified;k__unclassified;p__unclassified;c__unclassified;o__unclassified;f__unclassified;g__unclassified;s__unclassified
OTU291	0	0	0	0	0	0	0	0	0	11	d__unclassified;k__unclassified;p__unclassified;c__unclassified;o__unclassified;f__unclassified;g__unclassified;s__unclassified
OTU292	0	0	0	0	0	0	16	0	0	14	d__unclassified;k__unclassified;p__unclassified;c__unclassified;o__unclassified;f__unclassified;g__unclassified;s__unclassified
OTU293	0	0	0	0	0	0	0	0	0	15	d__unclassified;k__unclassified;p__unclassified;c__unclassified;o__unclassified;f__unclassified;g__unclassified;s__unclassified
OTU294	0	0	0	0	0	0	0	0	0	17	d__unclassified;k__unclassified;p__unclassified;c__unclassified;o__unclassified;f__unclassified;g__unclassified;s__unclassified
OTU295	0	0	0	0	0	0	1	0	0	24	d__unclassified;k__unclassified;p__unclassified;c__unclassified;o__unclassified;f__unclassified;g__unclassified;s__unclassified
OTU296	0	0	7	0	0	0	6	0	0	377	d__unclassified;k__unclassified;p__unclassified;c__unclassified;o__unclassified;f__unclassified;g__unclassified;s__unclassified
OTU297	0	0	12	0	0	0	0	0	3	12	d__Bacteria;k__unclassified_d__Bacteria;p__Proteobacteria;c__Betaproteobacteria;o__Burkholderiales;f__Burkholderiaceae;g__Ralstonia;s__Ralstonia_pickettii
OTU298	0	0	0	0	0	0	0	0	0	8	d__Archaea;k__unclassified_d__Archaea;p__Euryarchaeota;c__unclassified_p__Euryarchaeota;o__unclassified_p__Euryarchaeota;f__unclassified_p__Euryarchaeota;g__unclassified_p__Euryarchaeota;s__uncultured_marine_group_II/III_euryarchaeote_KM3_102_C05
OTU299	0	0	0	0	0	0	4	0	0	3	d__unclassified;k__unclassified;p__unclassified;c__unclassified;o__unclassified;f__unclassified;g__unclassified;s__unclassified
OTU300	0	0	0	0	0	0	15	0	0	1	d__unclassified;k__unclassified;p__unclassified;c__unclassified;o__unclassified;f__unclassified;g__unclassified;s__unclassified
OTU301	0	0	0	0	0	0	0	0	0	34	d__unclassified;k__unclassified;p__unclassified;c__unclassified;o__unclassified;f__unclassified;g__unclassified;s__unclassified
OTU302	0	0	0	0	0	0	0	0	0	11	d__Bacteria;k__unclassified_d__Bacteria;p__Proteobacteria;c__Betaproteobacteria;o__Burkholderiales;f__Burkholderiaceae;g__Ralstonia;s__Ralstonia_insidiosa
OTU303	0	0	0	0	0	0	0	0	0	19	d__unclassified;k__unclassified;p__unclassified;c__unclassified;o__unclassified;f__unclassified;g__unclassified;s__unclassified
OTU304	0	0	0	0	0	0	0	0	0	5	d__unclassified;k__unclassified;p__unclassified;c__unclassified;o__unclassified;f__unclassified;g__unclassified;s__unclassified
OTU305	0	0	0	0	0	0	0	0	0	10	d__unclassified;k__unclassified;p__unclassified;c__unclassified;o__unclassified;f__unclassified;g__unclassified;s__unclassified
OTU306	0	0	0	0	0	0	0	0	0	8	d__unclassified;k__unclassified;p__unclassified;c__unclassified;o__unclassified;f__unclassified;g__unclassified;s__unclassified
OTU307	0	0	0	0	0	0	7	0	0	35	d__unclassified;k__unclassified;p__unclassified;c__unclassified;o__unclassified;f__unclassified;g__unclassified;s__unclassified
OTU308	0	0	84	0	0	0	0	11	0	6	d__Eukaryota;k__Viridiplantae;p__Chlorophyta;c__Mamiellophyceae;o__Mamiellales;f__Mamiellaceae;g__Micromonas;s__Micromonas_commoda
OTU309	0	0	0	0	0	0	0	0	0	9	d__unclassified;k__unclassified;p__unclassified;c__unclassified;o__unclassified;f__unclassified;g__unclassified;s__unclassified
OTU310	0	0	0	0	0	0	45	0	22	369	d__unclassified;k__unclassified;p__unclassified;c__unclassified;o__unclassified;f__unclassified;g__unclassified;s__unclassified
OTU311	0	0	0	0	0	0	4	0	0	35	d__unclassified;k__unclassified;p__unclassified;c__unclassified;o__unclassified;f__unclassified;g__unclassified;s__unclassified
OTU312	0	0	0	0	0	0	0	0	0	3	d__Bacteria;k__unclassified_d__Bacteria;p__Actinobacteria_d__Bacteria;c__Actinobacteria_p__Actinobacteria;o__Micrococcales;f__Dermabacteraceae;g__Brachybacterium;s__Brachybacterium_faecium
OTU313	0	0	0	0	0	0	0	0	0	14	d__unclassified;k__unclassified;p__unclassified;c__unclassified;o__unclassified;f__unclassified;g__unclassified;s__unclassified
OTU314	0	0	0	0	0	0	9	0	0	7	d__unclassified;k__unclassified;p__unclassified;c__unclassified;o__unclassified;f__unclassified;g__unclassified;s__unclassified
OTU315	0	0	0	0	0	0	0	0	0	16	d__unclassified;k__unclassified;p__unclassified;c__unclassified;o__unclassified;f__unclassified;g__unclassified;s__unclassified
OTU316	0	0	0	0	0	0	0	0	0	7	d__unclassified;k__unclassified;p__unclassified;c__unclassified;o__unclassified;f__unclassified;g__unclassified;s__unclassified
OTU317	0	0	0	0	0	0	0	0	0	3	d__unclassified;k__unclassified;p__unclassified;c__unclassified;o__unclassified;f__unclassified;g__unclassified;s__unclassified
OTU318	0	0	0	0	0	0	0	0	0	13	d__unclassified;k__unclassified;p__unclassified;c__unclassified;o__unclassified;f__unclassified;g__unclassified;s__unclassified
OTU319	0	0	0	0	0	0	3	0	0	7	d__unclassified;k__unclassified;p__unclassified;c__unclassified;o__unclassified;f__unclassified;g__unclassified;s__unclassified
OTU320	0	0	0	0	0	0	0	0	0	5	d__Bacteria;k__unclassified_d__Bacteria;p__Actinobacteria_d__Bacteria;c__Actinobacteria_p__Actinobacteria;o__Propionibacteriales;f__Nocardioidaceae;g__Nocardioides;s__Nocardioides_dokdonensis
OTU321	0	0	0	0	0	0	2	0	0	104	d__unclassified;k__unclassified;p__unclassified;c__unclassified;o__unclassified;f__unclassified;g__unclassified;s__unclassified
OTU322	0	0	0	0	0	0	2	0	0	19	d__unclassified;k__unclassified;p__unclassified;c__unclassified;o__unclassified;f__unclassified;g__unclassified;s__unclassified
OTU323	0	0	0	0	0	0	0	0	0	6	d__unclassified;k__unclassified;p__unclassified;c__unclassified;o__unclassified;f__unclassified;g__unclassified;s__unclassified
OTU324	0	0	0	0	0	0	0	0	0	18	d__Bacteria;k__unclassified_d__Bacteria;p__Proteobacteria;c__Gammaproteobacteria;o__unclassified_c__Gammaproteobacteria;f__unclassified_c__Gammaproteobacteria;g__Thiohalobacter;s__Thiohalobacter_thiocyanaticus
OTU325	0	0	0	0	0	0	0	0	0	18	d__unclassified;k__unclassified;p__unclassified;c__unclassified;o__unclassified;f__unclassified;g__unclassified;s__unclassified
OTU326	0	0	0	0	0	0	0	0	0	8	d__unclassified;k__unclassified;p__unclassified;c__unclassified;o__unclassified;f__unclassified;g__unclassified;s__unclassified
OTU327	0	0	0	0	0	0	8	0	0	43	d__unclassified;k__unclassified;p__unclassified;c__unclassified;o__unclassified;f__unclassified;g__unclassified;s__unclassified
OTU328	0	0	0	0	0	0	2	0	0	7	d__unclassified;k__unclassified;p__unclassified;c__unclassified;o__unclassified;f__unclassified;g__unclassified;s__unclassified
OTU329	0	0	0	0	0	0	0	0	5	23	d__unclassified;k__unclassified;p__unclassified;c__unclassified;o__unclassified;f__unclassified;g__unclassified;s__unclassified
OTU330	0	0	0	0	0	0	0	0	0	16	d__unclassified;k__unclassified;p__unclassified;c__unclassified;o__unclassified;f__unclassified;g__unclassified;s__unclassified
OTU331	0	0	0	0	0	0	0	0	0	8	d__unclassified;k__unclassified;p__unclassified;c__unclassified;o__unclassified;f__unclassified;g__unclassified;s__unclassified
OTU332	0	0	0	0	0	0	5	0	0	34	d__unclassified;k__unclassified;p__unclassified;c__unclassified;o__unclassified;f__unclassified;g__unclassified;s__unclassified
OTU333	0	0	0	0	0	0	137	0	1	537	d__Archaea;k__unclassified_d__Archaea;p__Euryarchaeota;c__unclassified_p__Euryarchaeota;o__unclassified_p__Euryarchaeota;f__unclassified_p__Euryarchaeota;g__unclassified_p__Euryarchaeota;s__uncultured_marine_group_II/III_euryarchaeote_KM3_102_C05
OTU334	0	0	0	0	0	0	0	0	0	3	d__unclassified;k__unclassified;p__unclassified;c__unclassified;o__unclassified;f__unclassified;g__unclassified;s__unclassified
OTU335	0	0	0	0	0	0	0	0	0	17	d__unclassified;k__unclassified;p__unclassified;c__unclassified;o__unclassified;f__unclassified;g__unclassified;s__unclassified
OTU336	0	0	0	0	0	0	0	1	1	10	d__unclassified;k__unclassified;p__unclassified;c__unclassified;o__unclassified;f__unclassified;g__unclassified;s__unclassified
OTU337	0	0	0	0	0	0	0	0	6	12	d__unclassified;k__unclassified;p__unclassified;c__unclassified;o__unclassified;f__unclassified;g__unclassified;s__unclassified
OTU338	0	0	0	0	0	0	21	0	0	270	d__unclassified;k__unclassified;p__unclassified;c__unclassified;o__unclassified;f__unclassified;g__unclassified;s__unclassified
OTU339	0	0	0	0	0	0	0	0	0	5	d__unclassified;k__unclassified;p__unclassified;c__unclassified;o__unclassified;f__unclassified;g__unclassified;s__unclassified
OTU340	0	0	0	0	0	0	11	0	0	117	d__unclassified;k__unclassified;p__unclassified;c__unclassified;o__unclassified;f__unclassified;g__unclassified;s__unclassified
OTU341	0	0	0	0	0	0	0	0	0	3	d__unclassified;k__unclassified;p__unclassified;c__unclassified;o__unclassified;f__unclassified;g__unclassified;s__unclassified
OTU342	0	0	0	0	0	0	0	0	0	6	d__unclassified;k__unclassified;p__unclassified;c__unclassified;o__unclassified;f__unclassified;g__unclassified;s__unclassified
OTU343	0	0	0	0	0	0	0	0	0	6	d__unclassified;k__unclassified;p__unclassified;c__unclassified;o__unclassified;f__unclassified;g__unclassified;s__unclassified
OTU344	0	0	0	0	0	0	2	0	2	115	d__unclassified;k__unclassified;p__unclassified;c__unclassified;o__unclassified;f__unclassified;g__unclassified;s__unclassified
OTU345	0	0	0	0	0	0	0	0	0	216	d__Bacteria;k__unclassified_d__Bacteria;p__Proteobacteria;c__Betaproteobacteria;o__Burkholderiales;f__Comamonadaceae;g__Pelomonas;s__Pelomonas_saccharophila
OTU346	0	0	0	0	0	0	0	0	0	8	d__Bacteria;k__unclassified_d__Bacteria;p__unclassified_d__Bacteria;c__unclassified_d__Bacteria;o__unclassified_d__Bacteria;f__unclassified_d__Bacteria;g__unclassified_d__Bacteria;s__uncultured_nitrogen-fixing_bacterium
OTU347	0	0	0	0	0	0	0	0	0	42	d__unclassified;k__unclassified;p__unclassified;c__unclassified;o__unclassified;f__unclassified;g__unclassified;s__unclassified
OTU348	0	0	0	0	0	0	0	0	0	16	d__unclassified;k__unclassified;p__unclassified;c__unclassified;o__unclassified;f__unclassified;g__unclassified;s__unclassified
OTU349	0	0	0	0	0	0	0	0	0	28	d__unclassified;k__unclassified;p__unclassified;c__unclassified;o__unclassified;f__unclassified;g__unclassified;s__unclassified
OTU350	0	0	0	0	0	0	7	0	0	24	d__unclassified;k__unclassified;p__unclassified;c__unclassified;o__unclassified;f__unclassified;g__unclassified;s__unclassified
OTU351	0	0	0	0	0	0	0	0	0	8	d__unclassified;k__unclassified;p__unclassified;c__unclassified;o__unclassified;f__unclassified;g__unclassified;s__unclassified
OTU352	0	0	0	0	0	0	1	0	0	14	d__unclassified;k__unclassified;p__unclassified;c__unclassified;o__unclassified;f__unclassified;g__unclassified;s__unclassified
OTU353	0	0	0	0	0	0	0	0	17	8	d__unclassified;k__unclassified;p__unclassified;c__unclassified;o__unclassified;f__unclassified;g__unclassified;s__unclassified
OTU354	0	0	0	0	0	0	0	0	0	4	d__unclassified;k__unclassified;p__unclassified;c__unclassified;o__unclassified;f__unclassified;g__unclassified;s__unclassified
OTU355	0	0	0	0	0	0	0	0	0	3	d__unclassified;k__unclassified;p__unclassified;c__unclassified;o__unclassified;f__unclassified;g__unclassified;s__unclassified
OTU356	0	0	36	0	0	0	0	8	0	236	d__Bacteria;k__unclassified_d__Bacteria;p__unclassified_d__Bacteria;c__unclassified_d__Bacteria;o__unclassified_d__Bacteria;f__unclassified_d__Bacteria;g__unclassified_d__Bacteria;s__uncultured_bacterium
OTU357	0	0	0	0	0	0	0	0	0	14	d__unclassified;k__unclassified;p__unclassified;c__unclassified;o__unclassified;f__unclassified;g__unclassified;s__unclassified
OTU358	0	0	0	0	0	0	0	0	0	26	d__unclassified;k__unclassified;p__unclassified;c__unclassified;o__unclassified;f__unclassified;g__unclassified;s__unclassified
OTU359	0	0	0	0	0	0	0	0	0	77	d__unclassified;k__unclassified;p__unclassified;c__unclassified;o__unclassified;f__unclassified;g__unclassified;s__unclassified
OTU360	0	0	0	0	0	0	0	0	1	19	d__unclassified;k__unclassified;p__unclassified;c__unclassified;o__unclassified;f__unclassified;g__unclassified;s__unclassified
OTU361	0	0	0	0	0	0	0	0	0	67	d__unclassified;k__unclassified;p__unclassified;c__unclassified;o__unclassified;f__unclassified;g__unclassified;s__unclassified
OTU362	0	0	0	0	0	0	2	0	0	25	d__unclassified;k__unclassified;p__unclassified;c__unclassified;o__unclassified;f__unclassified;g__unclassified;s__unclassified
OTU363	0	0	0	0	0	0	4	0	0	7	d__unclassified;k__unclassified;p__unclassified;c__unclassified;o__unclassified;f__unclassified;g__unclassified;s__unclassified
OTU364	0	0	0	0	0	0	0	0	1	12	d__Bacteria;k__unclassified_d__Bacteria;p__unclassified_d__Bacteria;c__unclassified_d__Bacteria;o__unclassified_d__Bacteria;f__unclassified_d__Bacteria;g__unclassified_d__Bacteria;s__uncultured_bacterium
OTU365	0	2	23	0	1	0	0	14	0	11	d__Bacteria;k__unclassified_d__Bacteria;p__unclassified_d__Bacteria;c__unclassified_d__Bacteria;o__unclassified_d__Bacteria;f__unclassified_d__Bacteria;g__unclassified_d__Bacteria;s__uncultured_bacterium
OTU366	0	0	7	0	0	0	0	0	0	0	d__unclassified;k__unclassified;p__unclassified;c__unclassified;o__unclassified;f__unclassified;g__unclassified;s__unclassified
OTU367	0	0	8	0	0	0	0	2	0	0	d__Bacteria;k__unclassified_d__Bacteria;p__Cyanobacteria;c__unclassified_p__Cyanobacteria;o__Synechococcales;f__Synechococcaceae;g__Synechococcus;s__Synechococcus_sp._KORDI-49
OTU368	0	0	17	0	0	0	0	0	0	0	d__Bacteria;k__unclassified_d__Bacteria;p__Proteobacteria;c__Betaproteobacteria;o__Burkholderiales;f__Comamonadaceae;g__Comamonas;s__Comamonas_testosteroni
OTU369	0	0	23	0	0	0	0	24	0	1	d__unclassified;k__unclassified;p__unclassified;c__unclassified;o__unclassified;f__unclassified;g__unclassified;s__unclassified
OTU370	0	0	5	0	1	0	0	1	0	0	d__unclassified;k__unclassified;p__unclassified;c__unclassified;o__unclassified;f__unclassified;g__unclassified;s__unclassified
OTU371	0	0	10	0	0	1	0	0	0	0	d__Bacteria;k__unclassified_d__Bacteria;p__unclassified_d__Bacteria;c__unclassified_d__Bacteria;o__unclassified_d__Bacteria;f__unclassified_d__Bacteria;g__unclassified_d__Bacteria;s__uncultured_marine_bacterium
OTU372	0	0	2	0	0	0	0	0	0	0	d__unclassified;k__unclassified;p__unclassified;c__unclassified;o__unclassified;f__unclassified;g__unclassified;s__unclassified
OTU373	0	0	15	0	0	0	0	0	0	0	d__unclassified;k__unclassified;p__unclassified;c__unclassified;o__unclassified;f__unclassified;g__unclassified;s__unclassified
OTU374	0	0	9	0	0	0	0	0	0	0	d__unclassified;k__unclassified;p__unclassified;c__unclassified;o__unclassified;f__unclassified;g__unclassified;s__unclassified
OTU375	0	0	202	0	0	0	0	0	13	0	d__Bacteria;k__unclassified_d__Bacteria;p__Proteobacteria;c__Betaproteobacteria;o__Burkholderiales;f__Comamonadaceae;g__Comamonas;s__Comamonas_testosteroni
OTU376	0	0	4	0	0	0	0	2	0	0	d__unclassified;k__unclassified;p__unclassified;c__unclassified;o__unclassified;f__unclassified;g__unclassified;s__unclassified
OTU377	0	0	5	0	0	0	0	1	0	0	d__unclassified;k__unclassified;p__unclassified;c__unclassified;o__unclassified;f__unclassified;g__unclassified;s__unclassified
OTU378	1	1	1153	0	0	0	0	42	0	0	d__unclassified;k__unclassified;p__unclassified;c__unclassified;o__unclassified;f__unclassified;g__unclassified;s__unclassified
OTU379	0	0	8	0	0	0	0	0	0	0	d__unclassified;k__unclassified;p__unclassified;c__unclassified;o__unclassified;f__unclassified;g__unclassified;s__unclassified
OTU380	0	0	2	0	0	0	0	1	0	0	d__Eukaryota;k__unclassified_d__Eukaryota;p__unclassified_d__Eukaryota;c__unclassified_d__Eukaryota;o__Isochrysidales;f__Noelaerhabdaceae;g__Emiliania;s__Emiliania_huxleyi
OTU381	0	0	881	0	0	0	0	3	0	6	d__Bacteria;k__unclassified_d__Bacteria;p__Cyanobacteria;c__unclassified_p__Cyanobacteria;o__Synechococcales;f__Synechococcaceae;g__Synechococcus;s__Synechococcus_sp._KORDI-52
OTU382	0	0	27	0	0	0	0	0	0	0	d__Bacteria;k__unclassified_d__Bacteria;p__Cyanobacteria;c__unclassified_p__Cyanobacteria;o__Synechococcales;f__Synechococcaceae;g__Synechococcus;s__Synechococcus_sp._CC9605
OTU383	0	0	9	0	0	0	0	0	0	0	d__unclassified;k__unclassified;p__unclassified;c__unclassified;o__unclassified;f__unclassified;g__unclassified;s__unclassified
OTU384	0	0	7	0	0	0	0	4	0	2	d__Eukaryota;k__Viridiplantae;p__Streptophyta;c__Liliopsida;o__Poales;f__Poaceae;g__Triticum;s__Triticum_aestivum
OTU385	3	5	15	9	1	0	0	0	0	0	d__Bacteria;k__unclassified_d__Bacteria;p__Proteobacteria;c__Alphaproteobacteria;o__Rhodobacterales;f__Rhodobacteraceae;g__Leisingera;s__Leisingera_methylohalidivorans
OTU386	0	0	8	0	0	0	0	0	0	0	d__unclassified;k__unclassified;p__unclassified;c__unclassified;o__unclassified;f__unclassified;g__unclassified;s__unclassified
OTU387	2	0	6	0	0	0	0	0	0	0	d__Bacteria;k__unclassified_d__Bacteria;p__Proteobacteria;c__Alphaproteobacteria;o__Rhizobiales;f__Rhizobiaceae;g__Ensifer;s__Ensifer_adhaerens
OTU388	0	0	27	0	0	0	0	0	0	14	d__Bacteria;k__unclassified_d__Bacteria;p__Proteobacteria;c__Gammaproteobacteria;o__Vibrionales;f__Vibrionaceae;g__Vibrio;s__Vibrio_campbellii
OTU389	0	0	18	0	1	0	14	5	0	0	d__Bacteria;k__unclassified_d__Bacteria;p__Proteobacteria;c__Betaproteobacteria;o__Rhodocyclales;f__Azonexaceae;g__Dechloromonas;s__uncultured_Dechloromonas_sp.
OTU390	0	0	4606	0	0	0	0	0	0	362	d__Bacteria;k__unclassified_d__Bacteria;p__Cyanobacteria;c__unclassified_p__Cyanobacteria;o__Chroococcales;f__Aphanothecaceae;g__Candidatus_Atelocyanobacterium;s__Candidatus_Atelocyanobacterium_thalassa
OTU391	0	0	9	0	0	0	0	0	0	0	d__Bacteria;k__unclassified_d__Bacteria;p__Cyanobacteria;c__unclassified_p__Cyanobacteria;o__Synechococcales;f__Synechococcaceae;g__Synechococcus;s__Synechococcus_sp._CC9605
OTU392	0	0	7	0	0	0	0	2	0	0	d__unclassified;k__unclassified;p__unclassified;c__unclassified;o__unclassified;f__unclassified;g__unclassified;s__unclassified
OTU393	0	0	112	0	0	0	0	24	0	2	d__unclassified;k__unclassified;p__unclassified;c__unclassified;o__unclassified;f__unclassified;g__unclassified;s__unclassified
OTU394	0	0	14	0	0	0	0	0	0	0	d__Bacteria;k__unclassified_d__Bacteria;p__Proteobacteria;c__Gammaproteobacteria;o__Xanthomonadales;f__Xanthomonadaceae;g__Stenotrophomonas;s__Stenotrophomonas_sp._WZN-1
OTU395	0	0	528	0	0	0	0	0	2	0	d__Bacteria;k__unclassified_d__Bacteria;p__Proteobacteria;c__Betaproteobacteria;o__Burkholderiales;f__Comamonadaceae;g__Comamonas;s__Comamonas_testosteroni
OTU396	0	0	1	0	0	0	3	0	0	0	d__unclassified;k__unclassified;p__unclassified;c__unclassified;o__unclassified;f__unclassified;g__unclassified;s__unclassified
OTU397	0	0	7	0	0	0	1	35	0	0	d__Bacteria;k__unclassified_d__Bacteria;p__unclassified_d__Bacteria;c__unclassified_d__Bacteria;o__unclassified_d__Bacteria;f__unclassified_d__Bacteria;g__unclassified_d__Bacteria;s__uncultured_bacterium
OTU398	0	0	28	0	0	0	0	0	0	0	d__Bacteria;k__unclassified_d__Bacteria;p__Cyanobacteria;c__unclassified_p__Cyanobacteria;o__Synechococcales;f__Synechococcaceae;g__Synechococcus;s__Synechococcus_sp._KORDI-52
OTU399	0	0	47	0	0	0	0	3	0	0	d__unclassified;k__unclassified;p__unclassified;c__unclassified;o__unclassified;f__unclassified;g__unclassified;s__unclassified
OTU400	0	0	6	0	0	0	0	3	0	0	d__unclassified;k__unclassified;p__unclassified;c__unclassified;o__unclassified;f__unclassified;g__unclassified;s__unclassified
OTU401	0	0	7	0	0	0	0	0	0	0	d__unclassified;k__unclassified;p__unclassified;c__unclassified;o__unclassified;f__unclassified;g__unclassified;s__unclassified
OTU402	0	3	18	0	0	0	0	1	0	0	d__Bacteria;k__unclassified_d__Bacteria;p__Cyanobacteria;c__unclassified_p__Cyanobacteria;o__Synechococcales;f__Synechococcaceae;g__Synechococcus;s__Synechococcus_sp._WH_7803
OTU403	0	0	5	0	0	0	0	0	0	0	d__unclassified;k__unclassified;p__unclassified;c__unclassified;o__unclassified;f__unclassified;g__unclassified;s__unclassified
OTU404	3	0	79	0	2	0	0	0	0	0	d__Bacteria;k__unclassified_d__Bacteria;p__Proteobacteria;c__Alphaproteobacteria;o__Rhizobiales;f__Xanthobacteraceae;g__Xanthobacter;s__Xanthobacter_autotrophicus
OTU405	0	0	2	0	0	0	0	0	0	0	d__Bacteria;k__unclassified_d__Bacteria;p__Firmicutes;c__Bacilli;o__Bacillales;f__Bacillaceae;g__Bacillus_f__Bacillaceae;s__Bacillus_infantis
OTU406	0	1	72	0	0	0	0	1	0	0	d__Bacteria;k__unclassified_d__Bacteria;p__Cyanobacteria;c__unclassified_p__Cyanobacteria;o__Synechococcales;f__Synechococcaceae;g__Synechococcus;s__Synechococcus_sp._CC9605
OTU407	0	0	9	0	0	0	0	0	0	0	d__Bacteria;k__unclassified_d__Bacteria;p__Cyanobacteria;c__unclassified_p__Cyanobacteria;o__Synechococcales;f__Synechococcaceae;g__Synechococcus;s__Synechococcus_sp._KORDI-52
OTU408	0	0	10	0	1	1	0	0	1	9	d__unclassified;k__unclassified;p__unclassified;c__unclassified;o__unclassified;f__unclassified;g__unclassified;s__unclassified
OTU409	0	0	8	0	0	0	0	0	0	0	d__unclassified;k__unclassified;p__unclassified;c__unclassified;o__unclassified;f__unclassified;g__unclassified;s__unclassified
OTU410	0	0	35	0	0	0	0	14	0	0	d__unclassified;k__unclassified;p__unclassified;c__unclassified;o__unclassified;f__unclassified;g__unclassified;s__unclassified
OTU411	79	12	55	81	3	1	0	2	0	0	d__unclassified;k__unclassified;p__unclassified;c__unclassified;o__unclassified;f__unclassified;g__unclassified;s__unclassified
OTU412	0	0	2	0	0	0	0	0	3	0	d__Bacteria;k__unclassified_d__Bacteria;p__Proteobacteria;c__Gammaproteobacteria;o__Pseudomonadales;f__Pseudomonadaceae;g__Pseudomonas;s__Pseudomonas_sp._DRA525
OTU413	0	0	16	0	0	0	0	0	0	0	d__unclassified;k__unclassified;p__unclassified;c__unclassified;o__unclassified;f__unclassified;g__unclassified;s__unclassified
OTU414	0	0	2	0	0	0	0	0	0	0	d__unclassified;k__unclassified;p__unclassified;c__unclassified;o__unclassified;f__unclassified;g__unclassified;s__unclassified
OTU415	0	0	10	0	1	0	0	0	0	0	d__Bacteria;k__unclassified_d__Bacteria;p__Proteobacteria;c__Alphaproteobacteria;o__Rhodospirillales;f__Rhodospirillaceae;g__Magnetospirillum;s__Magnetospirillum_sp._ME-1
OTU416	0	0	4	0	0	0	0	4	0	0	d__unclassified;k__unclassified;p__unclassified;c__unclassified;o__unclassified;f__unclassified;g__unclassified;s__unclassified
OTU417	0	2	3	0	0	0	0	0	0	0	d__unclassified;k__unclassified;p__unclassified;c__unclassified;o__unclassified;f__unclassified;g__unclassified;s__unclassified
OTU418	0	0	8	0	0	0	0	0	0	0	d__unclassified;k__unclassified;p__unclassified;c__unclassified;o__unclassified;f__unclassified;g__unclassified;s__unclassified
OTU419	0	0	96	0	0	0	0	68	0	0	d__unclassified;k__unclassified;p__unclassified;c__unclassified;o__unclassified;f__unclassified;g__unclassified;s__unclassified
OTU420	0	0	4	0	0	0	0	19	0	0	d__unclassified;k__unclassified;p__unclassified;c__unclassified;o__unclassified;f__unclassified;g__unclassified;s__unclassified
OTU421	0	0	6	0	0	0	0	0	0	0	d__unclassified;k__unclassified;p__unclassified;c__unclassified;o__unclassified;f__unclassified;g__unclassified;s__unclassified
OTU422	0	0	707	0	0	0	0	517	11	8	d__Bacteria;k__unclassified_d__Bacteria;p__Proteobacteria;c__Alphaproteobacteria;o__Rhodospirillales;f__Rhodospirillaceae;g__Nitrospirillum;s__Nitrospirillum_amazonense
OTU423	0	1	2	0	0	0	0	0	0	0	d__unclassified;k__unclassified;p__unclassified;c__unclassified;o__unclassified;f__unclassified;g__unclassified;s__unclassified
OTU424	0	0	19	0	0	0	0	4	0	0	d__unclassified;k__unclassified;p__unclassified;c__unclassified;o__unclassified;f__unclassified;g__unclassified;s__unclassified
OTU425	1	0	2	1	0	0	0	0	0	0	d__Bacteria;k__unclassified_d__Bacteria;p__Cyanobacteria;c__unclassified_p__Cyanobacteria;o__Synechococcales;f__Synechococcaceae;g__Synechococcus;s__Synechococcus_sp._WH_8109
OTU426	0	3	24	0	0	0	0	0	0	0	d__Bacteria;k__unclassified_d__Bacteria;p__Cyanobacteria;c__unclassified_p__Cyanobacteria;o__Synechococcales;f__Synechococcaceae;g__Synechococcus;s__Synechococcus_sp._KORDI-100
OTU427	0	0	8	0	0	0	0	0	0	0	d__unclassified;k__unclassified;p__unclassified;c__unclassified;o__unclassified;f__unclassified;g__unclassified;s__unclassified
OTU428	0	0	15	0	0	0	0	13	0	0	d__Bacteria;k__unclassified_d__Bacteria;p__Bacteroidetes;c__Flavobacteriia;o__Flavobacteriales;f__Flavobacteriaceae;g__Sediminicola;s__Sediminicola_sp._YIK13
OTU429	0	0	9	0	0	0	0	0	0	62	d__unclassified;k__unclassified;p__unclassified;c__unclassified;o__unclassified;f__unclassified;g__unclassified;s__unclassified
OTU430	0	1	6	3	3	0	0	0	0	0	d__Bacteria;k__unclassified_d__Bacteria;p__unclassified_d__Bacteria;c__unclassified_d__Bacteria;o__unclassified_d__Bacteria;f__unclassified_d__Bacteria;g__unclassified_d__Bacteria;s__uncultured_bacterium
OTU431	0	0	7	2	0	0	0	0	0	0	d__Bacteria;k__unclassified_d__Bacteria;p__Cyanobacteria;c__unclassified_p__Cyanobacteria;o__Synechococcales;f__Synechococcaceae;g__Synechococcus;s__Synechococcus_sp._WH_8103
OTU432	0	0	42	0	0	0	0	0	0	0	d__Bacteria;k__unclassified_d__Bacteria;p__unclassified_d__Bacteria;c__unclassified_d__Bacteria;o__unclassified_d__Bacteria;f__unclassified_d__Bacteria;g__unclassified_d__Bacteria;s__uncultured_marine_bacterium
OTU433	0	0	6	0	0	0	0	0	0	0	d__unclassified;k__unclassified;p__unclassified;c__unclassified;o__unclassified;f__unclassified;g__unclassified;s__unclassified
OTU434	0	5	43	23	2	0	0	0	0	0	d__Bacteria;k__unclassified_d__Bacteria;p__unclassified_d__Bacteria;c__unclassified_d__Bacteria;o__unclassified_d__Bacteria;f__unclassified_d__Bacteria;g__unclassified_d__Bacteria;s__uncultured_bacterium
OTU435	0	0	0	0	0	0	0	0	13	0	d__unclassified;k__unclassified;p__unclassified;c__unclassified;o__unclassified;f__unclassified;g__unclassified;s__unclassified
OTU436	0	0	7	0	0	0	0	0	2	0	d__Bacteria;k__unclassified_d__Bacteria;p__Proteobacteria;c__Gammaproteobacteria;o__Vibrionales;f__Vibrionaceae;g__Vibrio;s__Vibrio_alginolyticus
OTU437	0	0	0	0	0	0	0	0	132	0	d__Bacteria;k__unclassified_d__Bacteria;p__Proteobacteria;c__Gammaproteobacteria;o__Pseudomonadales;f__Pseudomonadaceae;g__Pseudomonas;s__Pseudomonas_sabulinigri
OTU438	0	0	0	0	0	0	0	0	489	0	d__unclassified;k__unclassified;p__unclassified;c__unclassified;o__unclassified;f__unclassified;g__unclassified;s__unclassified
OTU439	0	0	2	0	0	0	0	0	26	0	d__unclassified;k__unclassified;p__unclassified;c__unclassified;o__unclassified;f__unclassified;g__unclassified;s__unclassified
OTU440	0	0	0	0	0	0	1	0	10	1	d__Archaea;k__unclassified_d__Archaea;p__Euryarchaeota;c__unclassified_p__Euryarchaeota;o__unclassified_p__Euryarchaeota;f__unclassified_p__Euryarchaeota;g__unclassified_p__Euryarchaeota;s__uncultured_marine_group_II/III_euryarchaeote_KM3_102_C05
OTU441	0	0	0	0	0	0	0	0	9	0	d__Bacteria;k__unclassified_d__Bacteria;p__Proteobacteria;c__Betaproteobacteria;o__Burkholderiales;f__Oxalobacteraceae;g__Massilia;s__Massilia_sp._B2
OTU442	0	4	0	0	0	0	0	0	17	0	d__Bacteria;k__unclassified_d__Bacteria;p__Proteobacteria;c__Alphaproteobacteria;o__Rhodobacterales;f__Rhodobacteraceae;g__Sagittula;s__Sagittula_sp._P11
OTU443	0	0	0	0	0	0	0	0	26	0	d__unclassified;k__unclassified;p__unclassified;c__unclassified;o__unclassified;f__unclassified;g__unclassified;s__unclassified
OTU444	0	0	0	0	0	0	0	0	14	0	d__Bacteria;k__unclassified_d__Bacteria;p__Proteobacteria;c__Alphaproteobacteria;o__Rhizobiales;f__Bradyrhizobiaceae;g__Rhodopseudomonas;s__Rhodopseudomonas_palustris
OTU445	0	0	0	0	0	0	0	0	8	0	d__unclassified;k__unclassified;p__unclassified;c__unclassified;o__unclassified;f__unclassified;g__unclassified;s__unclassified
OTU446	0	0	0	0	0	0	0	0	8	0	d__unclassified;k__unclassified;p__unclassified;c__unclassified;o__unclassified;f__unclassified;g__unclassified;s__unclassified
OTU447	0	0	0	0	0	0	0	0	20	0	d__Bacteria;k__unclassified_d__Bacteria;p__Proteobacteria;c__Gammaproteobacteria;o__Pseudomonadales;f__Pseudomonadaceae;g__Pseudomonas;s__Pseudomonas_putida
OTU448	0	0	0	0	0	0	5	0	34	4	d__unclassified;k__unclassified;p__unclassified;c__unclassified;o__unclassified;f__unclassified;g__unclassified;s__unclassified
OTU449	0	0	0	0	0	0	0	0	91	0	d__unclassified;k__unclassified;p__unclassified;c__unclassified;o__unclassified;f__unclassified;g__unclassified;s__unclassified
OTU450	0	0	0	0	0	0	0	0	23	0	d__unclassified;k__unclassified;p__unclassified;c__unclassified;o__unclassified;f__unclassified;g__unclassified;s__unclassified
OTU451	0	0	0	0	0	0	0	0	64	0	d__unclassified;k__unclassified;p__unclassified;c__unclassified;o__unclassified;f__unclassified;g__unclassified;s__unclassified
OTU452	0	0	0	0	0	0	0	0	11	0	d__unclassified;k__unclassified;p__unclassified;c__unclassified;o__unclassified;f__unclassified;g__unclassified;s__unclassified
OTU453	0	0	0	0	0	0	0	0	134	0	d__unclassified;k__unclassified;p__unclassified;c__unclassified;o__unclassified;f__unclassified;g__unclassified;s__unclassified
OTU454	0	0	0	0	0	0	0	0	4	8	d__Bacteria;k__unclassified_d__Bacteria;p__Actinobacteria_d__Bacteria;c__Actinobacteria_p__Actinobacteria;o__Corynebacteriales;f__Nocardiaceae;g__Rhodococcus_f__Nocardiaceae;s__Rhodococcus_sp._YL-1
OTU455	0	0	0	0	0	0	0	0	5	0	d__Bacteria;k__unclassified_d__Bacteria;p__unclassified_d__Bacteria;c__unclassified_d__Bacteria;o__unclassified_d__Bacteria;f__unclassified_d__Bacteria;g__unclassified_d__Bacteria;s__uncultured_bacterium
OTU456	0	0	0	0	0	0	0	0	20	0	d__unclassified;k__unclassified;p__unclassified;c__unclassified;o__unclassified;f__unclassified;g__unclassified;s__unclassified
OTU457	0	0	0	0	0	0	0	0	10	0	d__unclassified;k__unclassified;p__unclassified;c__unclassified;o__unclassified;f__unclassified;g__unclassified;s__unclassified
OTU458	0	0	0	0	0	0	0	0	10	0	d__Bacteria;k__unclassified_d__Bacteria;p__Proteobacteria;c__Gammaproteobacteria;o__Oceanospirillales;f__Halomonadaceae;g__Halomonas;s__Halomonas_ventosae
OTU459	0	0	0	0	0	0	0	0	9	0	d__unclassified;k__unclassified;p__unclassified;c__unclassified;o__unclassified;f__unclassified;g__unclassified;s__unclassified
OTU460	0	0	0	0	0	0	0	0	10	0	d__Bacteria;k__unclassified_d__Bacteria;p__Proteobacteria;c__Alphaproteobacteria;o__Rhizobiales;f__Phyllobacteriaceae;g__Hoeflea;s__Hoeflea_sp._IMCC20628
OTU461	135	4	0	15	2	0	5	0	9	0	d__Bacteria;k__unclassified_d__Bacteria;p__Proteobacteria;c__Alphaproteobacteria;o__Rhodobacterales;f__Rhodobacteraceae;g__Tateyamaria;s__Tateyamaria_omphalii
OTU462	0	0	0	0	0	0	2	0	245	0	d__Bacteria;k__unclassified_d__Bacteria;p__Chloroflexi;c__Ardenticatenia;o__Ardenticatenales;f__Ardenticatenaceae;g__Candidatus_Promineofilum;s__Candidatus_Promineofilum_breve
OTU463	0	0	0	0	0	0	0	0	8	0	d__unclassified;k__unclassified;p__unclassified;c__unclassified;o__unclassified;f__unclassified;g__unclassified;s__unclassified
OTU464	0	0	29	0	0	0	0	9	2133	0	d__Bacteria;k__unclassified_d__Bacteria;p__Proteobacteria;c__Gammaproteobacteria;o__Pseudomonadales;f__Pseudomonadaceae;g__Pseudomonas;s__Pseudomonas_azotifigens
OTU465	0	0	0	0	0	0	0	0	434	0	d__unclassified;k__unclassified;p__unclassified;c__unclassified;o__unclassified;f__unclassified;g__unclassified;s__unclassified
OTU466	0	0	0	0	0	0	0	0	4	0	d__unclassified;k__unclassified;p__unclassified;c__unclassified;o__unclassified;f__unclassified;g__unclassified;s__unclassified
OTU467	0	0	0	0	0	0	0	0	84	0	d__unclassified;k__unclassified_d__unclassified;p__unclassified_d__unclassified;c__unclassified_d__unclassified;o__unclassified_d__unclassified;f__unclassified_d__unclassified;g__unclassified_d__unclassified;s__uncultured_microorganism
OTU468	0	0	0	0	0	0	0	0	39	0	d__unclassified;k__unclassified;p__unclassified;c__unclassified;o__unclassified;f__unclassified;g__unclassified;s__unclassified
OTU469	0	0	0	0	0	0	0	0	28	0	d__unclassified;k__unclassified;p__unclassified;c__unclassified;o__unclassified;f__unclassified;g__unclassified;s__unclassified
OTU470	0	0	0	0	0	0	0	0	243	14	d__Archaea;k__unclassified_d__Archaea;p__Euryarchaeota;c__unclassified_p__Euryarchaeota;o__unclassified_p__Euryarchaeota;f__unclassified_p__Euryarchaeota;g__unclassified_p__Euryarchaeota;s__uncultured_marine_group_II/III_euryarchaeote_KM3_102_C05
OTU471	0	0	0	0	0	0	0	0	46	0	d__unclassified;k__unclassified;p__unclassified;c__unclassified;o__unclassified;f__unclassified;g__unclassified;s__unclassified
OTU472	0	0	0	0	0	0	0	0	17	0	d__unclassified;k__unclassified;p__unclassified;c__unclassified;o__unclassified;f__unclassified;g__unclassified;s__unclassified
OTU473	0	0	0	0	0	0	0	0	7	0	d__unclassified;k__unclassified;p__unclassified;c__unclassified;o__unclassified;f__unclassified;g__unclassified;s__unclassified
OTU474	0	0	0	0	0	0	0	0	27	0	d__unclassified;k__unclassified;p__unclassified;c__unclassified;o__unclassified;f__unclassified;g__unclassified;s__unclassified
OTU475	0	0	0	0	0	0	0	0	25	0	d__unclassified;k__unclassified;p__unclassified;c__unclassified;o__unclassified;f__unclassified;g__unclassified;s__unclassified
OTU476	0	0	0	0	0	0	0	0	7	5	d__Archaea;k__unclassified_d__Archaea;p__Euryarchaeota;c__unclassified_p__Euryarchaeota;o__unclassified_p__Euryarchaeota;f__unclassified_p__Euryarchaeota;g__unclassified_p__Euryarchaeota;s__uncultured_marine_group_II/III_euryarchaeote_KM3_62_D04
OTU477	0	0	0	0	0	0	1	0	95	5	d__unclassified;k__unclassified;p__unclassified;c__unclassified;o__unclassified;f__unclassified;g__unclassified;s__unclassified
OTU478	0	0	0	0	0	0	0	0	4	0	d__unclassified;k__unclassified;p__unclassified;c__unclassified;o__unclassified;f__unclassified;g__unclassified;s__unclassified
OTU479	0	0	0	0	0	0	0	0	22	0	d__unclassified;k__unclassified;p__unclassified;c__unclassified;o__unclassified;f__unclassified;g__unclassified;s__unclassified
OTU480	0	0	0	0	0	0	0	0	10	0	d__unclassified;k__unclassified;p__unclassified;c__unclassified;o__unclassified;f__unclassified;g__unclassified;s__unclassified
OTU481	0	0	0	0	0	0	5	0	148	10	d__unclassified;k__unclassified;p__unclassified;c__unclassified;o__unclassified;f__unclassified;g__unclassified;s__unclassified
OTU482	0	0	0	0	0	0	0	0	166	10	d__unclassified;k__unclassified;p__unclassified;c__unclassified;o__unclassified;f__unclassified;g__unclassified;s__unclassified
OTU483	0	0	0	0	0	0	0	0	20	6	d__unclassified;k__unclassified;p__unclassified;c__unclassified;o__unclassified;f__unclassified;g__unclassified;s__unclassified
OTU484	0	0	0	0	0	0	0	0	9	0	d__Bacteria;k__unclassified_d__Bacteria;p__Proteobacteria;c__Alphaproteobacteria;o__Sphingomonadales;f__Erythrobacteraceae;g__Croceicoccus;s__Croceicoccus_marinus
OTU485	0	0	0	0	0	0	0	0	16	0	d__unclassified;k__unclassified;p__unclassified;c__unclassified;o__unclassified;f__unclassified;g__unclassified;s__unclassified
OTU486	0	0	0	0	0	0	0	0	31	0	d__unclassified;k__unclassified;p__unclassified;c__unclassified;o__unclassified;f__unclassified;g__unclassified;s__unclassified
OTU487	0	0	0	0	0	0	0	0	7	0	d__unclassified;k__unclassified;p__unclassified;c__unclassified;o__unclassified;f__unclassified;g__unclassified;s__unclassified
OTU488	0	0	0	0	0	0	0	0	10	0	d__unclassified;k__unclassified;p__unclassified;c__unclassified;o__unclassified;f__unclassified;g__unclassified;s__unclassified
OTU489	0	2	2	0	1	0	0	0	37	0	d__unclassified;k__unclassified;p__unclassified;c__unclassified;o__unclassified;f__unclassified;g__unclassified;s__unclassified
OTU490	0	0	0	0	0	0	0	0	5	0	d__unclassified;k__unclassified;p__unclassified;c__unclassified;o__unclassified;f__unclassified;g__unclassified;s__unclassified
OTU491	0	0	0	0	0	0	0	0	21	0	d__Bacteria;k__unclassified_d__Bacteria;p__Proteobacteria;c__Gammaproteobacteria;o__Pseudomonadales;f__Pseudomonadaceae;g__Pseudomonas;s__Pseudomonas_sabulinigri
OTU492	0	0	0	0	0	0	0	0	34	0	d__unclassified;k__unclassified;p__unclassified;c__unclassified;o__unclassified;f__unclassified;g__unclassified;s__unclassified
OTU493	0	0	0	0	0	0	0	0	24	0	d__unclassified;k__unclassified;p__unclassified;c__unclassified;o__unclassified;f__unclassified;g__unclassified;s__unclassified
OTU494	0	0	0	2	0	0	1	0	18	0	d__unclassified;k__unclassified;p__unclassified;c__unclassified;o__unclassified;f__unclassified;g__unclassified;s__unclassified
OTU495	0	0	0	0	0	0	0	0	17	0	d__unclassified;k__unclassified;p__unclassified;c__unclassified;o__unclassified;f__unclassified;g__unclassified;s__unclassified
OTU496	0	0	0	0	0	0	0	0	15	0	d__unclassified;k__unclassified;p__unclassified;c__unclassified;o__unclassified;f__unclassified;g__unclassified;s__unclassified
OTU497	0	0	0	0	0	0	0	0	173	0	d__Bacteria;k__unclassified_d__Bacteria;p__Proteobacteria;c__Alphaproteobacteria;o__Rhizobiales;f__Bradyrhizobiaceae;g__Bradyrhizobium;s__Bradyrhizobium_sp._ORS_285
OTU498	0	0	0	0	0	0	0	0	14	0	d__unclassified;k__unclassified;p__unclassified;c__unclassified;o__unclassified;f__unclassified;g__unclassified;s__unclassified
OTU499	0	0	0	0	0	0	0	0	25	0	d__Bacteria;k__unclassified_d__Bacteria;p__Proteobacteria;c__Gammaproteobacteria;o__Xanthomonadales;f__Xanthomonadaceae;g__Xanthomonas;s__Xanthomonas_citri
OTU500	0	0	10	0	0	0	0	0	1	0	d__Bacteria;k__unclassified_d__Bacteria;p__Proteobacteria;c__Betaproteobacteria;o__Burkholderiales;f__Comamonadaceae;g__Comamonas;s__Comamonas_testosteroni
OTU501	5	1	1	0	0	0	0	0	28	0	d__Bacteria;k__unclassified_d__Bacteria;p__Proteobacteria;c__Alphaproteobacteria;o__Sphingomonadales;f__Erythrobacteraceae;g__Erythrobacter;s__Erythrobacter_flavus
OTU502	0	0	0	0	0	0	0	0	21	0	d__unclassified;k__unclassified;p__unclassified;c__unclassified;o__unclassified;f__unclassified;g__unclassified;s__unclassified
OTU503	0	0	0	0	0	0	0	0	7	0	d__unclassified;k__unclassified;p__unclassified;c__unclassified;o__unclassified;f__unclassified;g__unclassified;s__unclassified
OTU504	0	0	0	0	0	0	0	0	3	1	d__Bacteria;k__unclassified_d__Bacteria;p__Actinobacteria_d__Bacteria;c__Actinobacteria_p__Actinobacteria;o__Micrococcales;f__Micrococcaceae;g__Neomicrococcus;s__Neomicrococcus_aestuarii
OTU505	0	0	0	0	0	0	0	0	14	4	d__unclassified;k__unclassified;p__unclassified;c__unclassified;o__unclassified;f__unclassified;g__unclassified;s__unclassified
OTU506	0	0	0	0	0	0	0	0	22	0	d__unclassified;k__unclassified;p__unclassified;c__unclassified;o__unclassified;f__unclassified;g__unclassified;s__unclassified
OTU507	0	0	0	0	0	0	0	0	143	0	d__unclassified;k__unclassified;p__unclassified;c__unclassified;o__unclassified;f__unclassified;g__unclassified;s__unclassified
OTU508	0	0	0	0	0	0	0	0	262	1	d__unclassified;k__unclassified;p__unclassified;c__unclassified;o__unclassified;f__unclassified;g__unclassified;s__unclassified
OTU509	0	0	0	0	0	0	0	0	7	0	d__Bacteria;k__unclassified_d__Bacteria;p__Firmicutes;c__Bacilli;o__Lactobacillales;f__Enterococcaceae;g__Enterococcus;s__Enterococcus_faecalis
OTU510	0	0	0	0	0	0	2	0	16	16	d__unclassified;k__unclassified;p__unclassified;c__unclassified;o__unclassified;f__unclassified;g__unclassified;s__unclassified
OTU511	0	0	0	0	0	0	0	0	7	0	d__Bacteria;k__unclassified_d__Bacteria;p__Proteobacteria;c__Gammaproteobacteria;o__Pseudomonadales;f__Pseudomonadaceae;g__Pseudomonas;s__Pseudomonas_putida
OTU512	0	0	0	0	0	0	0	0	33	0	d__unclassified;k__unclassified;p__unclassified;c__unclassified;o__unclassified;f__unclassified;g__unclassified;s__unclassified
OTU513	0	0	0	0	0	0	0	0	6	0	d__unclassified;k__unclassified;p__unclassified;c__unclassified;o__unclassified;f__unclassified;g__unclassified;s__unclassified
OTU514	0	0	0	0	0	0	0	0	57	0	d__unclassified;k__unclassified;p__unclassified;c__unclassified;o__unclassified;f__unclassified;g__unclassified;s__unclassified
OTU515	9	1	84	0	0	0	0	3	526	2	d__Bacteria;k__unclassified_d__Bacteria;p__Proteobacteria;c__Betaproteobacteria;o__Burkholderiales;f__Alcaligenaceae;g__Orrella;s__Orrella_dioscoreae
OTU516	0	0	0	0	0	0	0	0	5	0	d__Bacteria;k__unclassified_d__Bacteria;p__Proteobacteria;c__Gammaproteobacteria;o__Pseudomonadales;f__Pseudomonadaceae;g__Pseudomonas;s__Pseudomonas_putida
OTU517	0	0	0	0	0	0	0	0	3	0	d__unclassified;k__unclassified;p__unclassified;c__unclassified;o__unclassified;f__unclassified;g__unclassified;s__unclassified
OTU518	5	5	1377	1	4	6	8	9	607	181	d__Bacteria;k__unclassified_d__Bacteria;p__Proteobacteria;c__Alphaproteobacteria;o__Rhodobacterales;f__Rhodobacteraceae;g__Yangia;s__Yangia_sp._CCB-MM3
OTU519	0	0	0	0	0	0	0	0	6	0	d__unclassified;k__unclassified;p__unclassified;c__unclassified;o__unclassified;f__unclassified;g__unclassified;s__unclassified
OTU520	0	0	0	0	0	0	0	0	250	0	d__unclassified;k__unclassified;p__unclassified;c__unclassified;o__unclassified;f__unclassified;g__unclassified;s__unclassified
OTU521	0	0	1	0	0	0	0	0	282	0	d__Bacteria;k__unclassified_d__Bacteria;p__Proteobacteria;c__Gammaproteobacteria;o__Pseudomonadales;f__Pseudomonadaceae;g__Pseudomonas;s__Pseudomonas_sp._JY-Q
OTU522	2	0	173	0	0	0	0	1	1784	0	d__unclassified;k__unclassified;p__unclassified;c__unclassified;o__unclassified;f__unclassified;g__unclassified;s__unclassified
OTU523	0	0	0	0	0	0	0	0	25	0	d__unclassified;k__unclassified;p__unclassified;c__unclassified;o__unclassified;f__unclassified;g__unclassified;s__unclassified
OTU524	0	0	0	0	0	0	0	0	50	0	d__Bacteria;k__unclassified_d__Bacteria;p__unclassified_d__Bacteria;c__unclassified_d__Bacteria;o__unclassified_d__Bacteria;f__unclassified_d__Bacteria;g__unclassified_d__Bacteria;s__uncultured_bacterium
OTU525	0	0	0	0	0	0	0	0	10	0	d__unclassified;k__unclassified;p__unclassified;c__unclassified;o__unclassified;f__unclassified;g__unclassified;s__unclassified
OTU526	0	0	0	0	0	0	0	0	19	0	d__unclassified;k__unclassified;p__unclassified;c__unclassified;o__unclassified;f__unclassified;g__unclassified;s__unclassified
OTU527	0	0	0	0	0	0	0	0	13	0	d__unclassified;k__unclassified;p__unclassified;c__unclassified;o__unclassified;f__unclassified;g__unclassified;s__unclassified
OTU528	1	10	0	40	0	0	0	0	75	0	d__Bacteria;k__unclassified_d__Bacteria;p__unclassified_d__Bacteria;c__unclassified_d__Bacteria;o__unclassified_d__Bacteria;f__unclassified_d__Bacteria;g__unclassified_d__Bacteria;s__uncultured_bacterium
OTU529	0	0	0	0	0	0	0	0	6	0	d__Bacteria;k__unclassified_d__Bacteria;p__Proteobacteria;c__Gammaproteobacteria;o__Pseudomonadales;f__Pseudomonadaceae;g__Pseudomonas;s__Pseudomonas_sp._JY-Q
OTU530	0	0	0	0	0	0	88	0	1364	174	d__unclassified;k__unclassified;p__unclassified;c__unclassified;o__unclassified;f__unclassified;g__unclassified;s__unclassified
OTU531	0	0	0	0	0	0	0	0	233	0	d__unclassified;k__unclassified;p__unclassified;c__unclassified;o__unclassified;f__unclassified;g__unclassified;s__unclassified
OTU532	0	8	0	0	0	0	0	8	141	0	d__Bacteria;k__unclassified_d__Bacteria;p__unclassified_d__Bacteria;c__unclassified_d__Bacteria;o__unclassified_d__Bacteria;f__unclassified_d__Bacteria;g__unclassified_d__Bacteria;s__uncultured_bacterium
OTU533	0	0	0	0	0	0	0	0	9	0	d__unclassified;k__unclassified;p__unclassified;c__unclassified;o__unclassified;f__unclassified;g__unclassified;s__unclassified
OTU534	0	0	0	0	0	0	0	0	27	0	d__unclassified;k__unclassified;p__unclassified;c__unclassified;o__unclassified;f__unclassified;g__unclassified;s__unclassified
OTU535	0	0	0	1	0	0	0	0	11	0	d__Bacteria;k__unclassified_d__Bacteria;p__Proteobacteria;c__Gammaproteobacteria;o__Pseudomonadales;f__Pseudomonadaceae;g__Pseudomonas;s__Pseudomonas_sabulinigri
OTU536	0	0	0	0	0	0	0	0	28	0	d__Bacteria;k__unclassified_d__Bacteria;p__Proteobacteria;c__Gammaproteobacteria;o__Pseudomonadales;f__Pseudomonadaceae;g__Pseudomonas;s__Pseudomonas_sp._S-6-2
OTU537	0	0	0	0	0	0	0	0	14	0	d__unclassified;k__unclassified;p__unclassified;c__unclassified;o__unclassified;f__unclassified;g__unclassified;s__unclassified
OTU538	0	0	0	0	0	0	0	0	8	0	d__unclassified;k__unclassified;p__unclassified;c__unclassified;o__unclassified;f__unclassified;g__unclassified;s__unclassified
OTU539	0	0	0	0	0	0	0	0	17	0	d__unclassified;k__unclassified;p__unclassified;c__unclassified;o__unclassified;f__unclassified;g__unclassified;s__unclassified
OTU540	0	0	0	0	0	0	0	0	8	0	d__unclassified;k__unclassified;p__unclassified;c__unclassified;o__unclassified;f__unclassified;g__unclassified;s__unclassified
OTU541	0	1	1	0	0	0	0	0	12	0	d__Bacteria;k__unclassified_d__Bacteria;p__Actinobacteria_d__Bacteria;c__Actinobacteria_p__Actinobacteria;o__Micrococcales;f__Microbacteriaceae;g__Microbacterium;s__Microbacterium_sp._PAMC_28756
OTU542	0	0	0	0	0	0	0	0	7	0	d__unclassified;k__unclassified;p__unclassified;c__unclassified;o__unclassified;f__unclassified;g__unclassified;s__unclassified
OTU543	0	0	0	0	0	0	0	0	8	0	d__unclassified;k__unclassified;p__unclassified;c__unclassified;o__unclassified;f__unclassified;g__unclassified;s__unclassified
OTU544	0	0	0	0	0	0	0	0	30	0	d__unclassified;k__unclassified;p__unclassified;c__unclassified;o__unclassified;f__unclassified;g__unclassified;s__unclassified
OTU545	0	0	0	0	0	0	0	0	23	0	d__Bacteria;k__unclassified_d__Bacteria;p__Actinobacteria_d__Bacteria;c__Actinobacteria_p__Actinobacteria;o__Propionibacteriales;f__Nocardioidaceae;g__Marmoricola;s__Marmoricola_scoriae
OTU546	0	0	0	0	0	0	0	0	23	0	d__unclassified;k__unclassified;p__unclassified;c__unclassified;o__unclassified;f__unclassified;g__unclassified;s__unclassified
OTU547	0	0	0	0	0	0	0	0	12	0	d__Bacteria;k__unclassified_d__Bacteria;p__Proteobacteria;c__Gammaproteobacteria;o__Pseudomonadales;f__Pseudomonadaceae;g__Pseudomonas;s__Pseudomonas_guangdongensis
OTU548	0	0	0	0	0	0	0	0	23	0	d__Bacteria;k__unclassified_d__Bacteria;p__Verrucomicrobia;c__Opitutae;o__Opitutales;f__Opitutaceae;g__unclassified_f__Opitutaceae;s__Opitutaceae_bacterium_TAV5
OTU549	0	0	0	0	0	0	0	0	38	0	d__Bacteria;k__unclassified_d__Bacteria;p__Proteobacteria;c__Gammaproteobacteria;o__Vibrionales;f__Vibrionaceae;g__Vibrio;s__Vibrio_tritonius
OTU550	0	0	0	0	0	0	0	0	14	0	d__unclassified;k__unclassified;p__unclassified;c__unclassified;o__unclassified;f__unclassified;g__unclassified;s__unclassified
OTU551	0	0	0	0	0	0	0	0	4	0	d__unclassified;k__unclassified;p__unclassified;c__unclassified;o__unclassified;f__unclassified;g__unclassified;s__unclassified
OTU552	0	0	0	0	0	0	0	0	104	0	d__unclassified;k__unclassified;p__unclassified;c__unclassified;o__unclassified;f__unclassified;g__unclassified;s__unclassified
OTU553	0	0	0	0	0	0	3	0	1	4	d__unclassified;k__unclassified;p__unclassified;c__unclassified;o__unclassified;f__unclassified;g__unclassified;s__unclassified
OTU554	0	0	0	0	0	0	0	0	18	0	d__unclassified;k__unclassified;p__unclassified;c__unclassified;o__unclassified;f__unclassified;g__unclassified;s__unclassified
OTU555	0	0	0	0	0	0	0	0	7	0	d__unclassified;k__unclassified;p__unclassified;c__unclassified;o__unclassified;f__unclassified;g__unclassified;s__unclassified
OTU556	0	0	0	0	0	0	0	0	7	0	d__unclassified;k__unclassified;p__unclassified;c__unclassified;o__unclassified;f__unclassified;g__unclassified;s__unclassified
OTU557	0	0	0	0	0	0	1	0	11	15	d__Archaea;k__unclassified_d__Archaea;p__Euryarchaeota;c__unclassified_p__Euryarchaeota;o__unclassified_p__Euryarchaeota;f__unclassified_p__Euryarchaeota;g__unclassified_p__Euryarchaeota;s__uncultured_marine_group_II/III_euryarchaeote_KM3_102_C05
OTU558	0	0	8	0	0	76	0	0	0	0	d__Bacteria;k__unclassified_d__Bacteria;p__unclassified_d__Bacteria;c__unclassified_d__Bacteria;o__unclassified_d__Bacteria;f__unclassified_d__Bacteria;g__unclassified_d__Bacteria;s__uncultured_bacterium
OTU559	0	0	0	0	0	25	0	0	0	0	d__Bacteria;k__unclassified_d__Bacteria;p__unclassified_d__Bacteria;c__unclassified_d__Bacteria;o__unclassified_d__Bacteria;f__unclassified_d__Bacteria;g__unclassified_d__Bacteria;s__uncultured_bacterium
OTU560	0	0	0	0	0	11	0	0	0	0	d__Bacteria;k__unclassified_d__Bacteria;p__unclassified_d__Bacteria;c__unclassified_d__Bacteria;o__unclassified_d__Bacteria;f__unclassified_d__Bacteria;g__unclassified_d__Bacteria;s__uncultured_bacterium
OTU561	24	7	4	1	2	31	1	0	1	8	d__Bacteria;k__unclassified_d__Bacteria;p__Proteobacteria;c__Gammaproteobacteria;o__Methylococcales;f__Methylococcaceae;g__Methylomonas;s__Methylomonas_methanica
OTU562	0	0	0	0	0	11	0	0	0	0	d__Bacteria;k__unclassified_d__Bacteria;p__Proteobacteria;c__Deltaproteobacteria;o__Desulfovibrionales;f__Desulfovibrionaceae;g__Pseudodesulfovibrio;s__Pseudodesulfovibrio_profundus
OTU563	0	0	0	0	0	11	0	0	0	0	d__Bacteria;k__unclassified_d__Bacteria;p__unclassified_d__Bacteria;c__unclassified_d__Bacteria;o__unclassified_d__Bacteria;f__unclassified_d__Bacteria;g__unclassified_d__Bacteria;s__uncultured_bacterium
OTU564	3	1	0	0	0	17	0	0	0	0	d__unclassified;k__unclassified;p__unclassified;c__unclassified;o__unclassified;f__unclassified;g__unclassified;s__unclassified
OTU565	27	93	9	168	14	47	0	0	9	56	d__Bacteria;k__unclassified_d__Bacteria;p__unclassified_d__Bacteria;c__unclassified_d__Bacteria;o__unclassified_d__Bacteria;f__unclassified_d__Bacteria;g__unclassified_d__Bacteria;s__uncultured_bacterium
OTU566	0	0	0	0	5	42	0	0	0	0	d__Bacteria;k__unclassified_d__Bacteria;p__unclassified_d__Bacteria;c__unclassified_d__Bacteria;o__unclassified_d__Bacteria;f__unclassified_d__Bacteria;g__unclassified_d__Bacteria;s__uncultured_bacterium
OTU567	0	0	27	0	0	336	0	0	0	0	d__Bacteria;k__unclassified_d__Bacteria;p__unclassified_d__Bacteria;c__unclassified_d__Bacteria;o__unclassified_d__Bacteria;f__unclassified_d__Bacteria;g__unclassified_d__Bacteria;s__uncultured_bacterium
OTU568	0	0	0	1	2	8	0	0	6	0	d__Bacteria;k__unclassified_d__Bacteria;p__Proteobacteria;c__Gammaproteobacteria;o__Chromatiales;f__Chromatiaceae;g__Allochromatium;s__Allochromatium_vinosum
OTU569	0	0	0	0	0	97	0	0	0	0	d__Bacteria;k__unclassified_d__Bacteria;p__unclassified_d__Bacteria;c__unclassified_d__Bacteria;o__unclassified_d__Bacteria;f__unclassified_d__Bacteria;g__unclassified_d__Bacteria;s__uncultured_marine_bacterium
OTU570	0	0	0	0	0	44	0	0	0	0	d__Bacteria;k__unclassified_d__Bacteria;p__unclassified_d__Bacteria;c__unclassified_d__Bacteria;o__unclassified_d__Bacteria;f__unclassified_d__Bacteria;g__unclassified_d__Bacteria;s__uncultured_bacterium
OTU571	0	3	0	0	2	465	0	0	0	0	d__unclassified;k__unclassified_d__unclassified;p__unclassified_d__unclassified;c__unclassified_d__unclassified;o__unclassified_d__unclassified;f__unclassified_d__unclassified;g__unclassified_d__unclassified;s__uncultured_microorganism
OTU572	17	17	0	55	45	47	0	0	0	0	d__Bacteria;k__unclassified_d__Bacteria;p__unclassified_d__Bacteria;c__unclassified_d__Bacteria;o__unclassified_d__Bacteria;f__unclassified_d__Bacteria;g__unclassified_d__Bacteria;s__uncultured_bacterium
OTU573	5	5	0	5	0	1	0	0	0	0	d__Bacteria;k__unclassified_d__Bacteria;p__Cyanobacteria;c__unclassified_p__Cyanobacteria;o__Synechococcales;f__Synechococcaceae;g__Synechococcus;s__Synechococcus_sp._WH_8102
OTU574	0	0	0	0	1	18	0	0	0	0	d__Bacteria;k__unclassified_d__Bacteria;p__unclassified_d__Bacteria;c__unclassified_d__Bacteria;o__unclassified_d__Bacteria;f__unclassified_d__Bacteria;g__unclassified_d__Bacteria;s__uncultured_bacterium
OTU575	0	0	0	0	53	172	0	0	0	0	d__Bacteria;k__unclassified_d__Bacteria;p__Proteobacteria;c__Deltaproteobacteria;o__Desulfovibrionales;f__Desulfovibrionaceae;g__Pseudodesulfovibrio;s__Pseudodesulfovibrio_aespoeensis
OTU576	0	0	0	0	0	1093	0	0	0	0	d__Bacteria;k__unclassified_d__Bacteria;p__Proteobacteria;c__Betaproteobacteria;o__Rhodocyclales;f__Azonexaceae;g__Dechloromonas;s__Dechloromonas_aromatica
OTU577	0	0	0	0	3	47	0	0	0	0	d__Bacteria;k__unclassified_d__Bacteria;p__Proteobacteria;c__Deltaproteobacteria;o__Desulfovibrionales;f__Desulfovibrionaceae;g__Desulfovibrio;s__Desulfovibrio_desulfuricans
OTU578	0	0	0	0	0	22	0	0	0	0	d__Bacteria;k__unclassified_d__Bacteria;p__unclassified_d__Bacteria;c__unclassified_d__Bacteria;o__unclassified_d__Bacteria;f__unclassified_d__Bacteria;g__unclassified_d__Bacteria;s__uncultured_bacterium
OTU579	0	11	0	0	16	191	0	0	0	0	d__Bacteria;k__unclassified_d__Bacteria;p__unclassified_d__Bacteria;c__unclassified_d__Bacteria;o__unclassified_d__Bacteria;f__unclassified_d__Bacteria;g__unclassified_d__Bacteria;s__uncultured_bacterium
OTU580	0	3	0	9	2	61	1	0	6	0	d__unclassified;k__unclassified;p__unclassified;c__unclassified;o__unclassified;f__unclassified;g__unclassified;s__unclassified
OTU581	0	3	0	0	0	1	4	0	0	0	d__Bacteria;k__unclassified_d__Bacteria;p__Proteobacteria;c__Gammaproteobacteria;o__Pseudomonadales;f__Pseudomonadaceae;g__Azotobacter;s__Azotobacter_chroococcum
OTU582	16	34	0	41	13	236	0	0	0	0	d__Bacteria;k__unclassified_d__Bacteria;p__unclassified_d__Bacteria;c__unclassified_d__Bacteria;o__unclassified_d__Bacteria;f__unclassified_d__Bacteria;g__unclassified_d__Bacteria;s__uncultured_bacterium
OTU583	2102	1664	37	1370	1423	3489	0	12	0	0	d__Bacteria;k__unclassified_d__Bacteria;p__unclassified_d__Bacteria;c__unclassified_d__Bacteria;o__unclassified_d__Bacteria;f__unclassified_d__Bacteria;g__unclassified_d__Bacteria;s__uncultured_bacterium
OTU584	0	0	0	0	0	12	0	0	0	0	d__Bacteria;k__unclassified_d__Bacteria;p__Proteobacteria;c__Deltaproteobacteria;o__Desulfovibrionales;f__Desulfovibrionaceae;g__Desulfovibrio;s__Desulfovibrio_desulfuricans
OTU585	0	0	0	0	0	30	0	0	0	0	d__unclassified;k__unclassified_d__unclassified;p__unclassified_d__unclassified;c__unclassified_d__unclassified;o__unclassified_d__unclassified;f__unclassified_d__unclassified;g__unclassified_d__unclassified;s__uncultured_microorganism
OTU586	0	0	0	0	0	94	0	0	0	0	d__Bacteria;k__unclassified_d__Bacteria;p__Proteobacteria;c__Deltaproteobacteria;o__Desulfovibrionales;f__Desulfovibrionaceae;g__Pseudodesulfovibrio;s__Pseudodesulfovibrio_profundus
OTU587	0	0	0	0	0	9	0	6	0	0	d__Bacteria;k__unclassified_d__Bacteria;p__unclassified_d__Bacteria;c__unclassified_d__Bacteria;o__unclassified_d__Bacteria;f__unclassified_d__Bacteria;g__unclassified_d__Bacteria;s__uncultured_bacterium
OTU588	0	2	0	5	1	1	0	0	0	0	d__unclassified;k__unclassified;p__unclassified;c__unclassified;o__unclassified;f__unclassified;g__unclassified;s__unclassified
OTU589	3	1	0	0	9	3	0	0	0	0	d__Bacteria;k__unclassified_d__Bacteria;p__Proteobacteria;c__Gammaproteobacteria;o__Cellvibrionales;f__Microbulbiferaceae;g__Microbulbifer;s__Microbulbifer_aggregans
OTU590	0	0	0	4	0	8	0	0	0	0	d__Bacteria;k__unclassified_d__Bacteria;p__unclassified_d__Bacteria;c__unclassified_d__Bacteria;o__unclassified_d__Bacteria;f__unclassified_d__Bacteria;g__unclassified_d__Bacteria;s__uncultured_bacterium
OTU591	0	0	0	0	0	6	0	0	0	0	d__Bacteria;k__unclassified_d__Bacteria;p__Proteobacteria;c__Deltaproteobacteria;o__Desulfovibrionales;f__Desulfovibrionaceae;g__Pseudodesulfovibrio;s__Pseudodesulfovibrio_piezophilus
OTU592	12	2	0	1	2	2	0	0	0	0	d__unclassified;k__unclassified;p__unclassified;c__unclassified;o__unclassified;f__unclassified;g__unclassified;s__unclassified
OTU593	0	0	0	0	1	32	0	0	0	0	d__Bacteria;k__unclassified_d__Bacteria;p__unclassified_d__Bacteria;c__unclassified_d__Bacteria;o__unclassified_d__Bacteria;f__unclassified_d__Bacteria;g__unclassified_d__Bacteria;s__uncultured_bacterium
OTU594	0	6	0	16	1	16	0	0	0	0	d__Bacteria;k__unclassified_d__Bacteria;p__unclassified_d__Bacteria;c__unclassified_d__Bacteria;o__unclassified_d__Bacteria;f__unclassified_d__Bacteria;g__unclassified_d__Bacteria;s__uncultured_bacterium
OTU595	0	0	8	0	0	0	0	4	0	0	d__unclassified;k__unclassified;p__unclassified;c__unclassified;o__unclassified;f__unclassified;g__unclassified;s__unclassified
OTU596	0	0	75	0	0	0	0	290	0	0	d__Bacteria;k__unclassified_d__Bacteria;p__Proteobacteria;c__Alphaproteobacteria;o__Rhodospirillales;f__Acetobacteraceae;g__Asaia;s__Asaia_bogorensis
OTU597	0	0	62	1	0	0	0	44	0	1	d__unclassified;k__unclassified;p__unclassified;c__unclassified;o__unclassified;f__unclassified;g__unclassified;s__unclassified
OTU598	0	0	0	0	0	0	0	14	0	0	d__Bacteria;k__unclassified_d__Bacteria;p__Proteobacteria;c__Betaproteobacteria;o__Rhodocyclales;f__Rhodocyclaceae;g__Azospira;s__Azospira_oryzae
OTU599	0	0	296	0	0	0	0	182	0	15	d__Bacteria;k__unclassified_d__Bacteria;p__Proteobacteria;c__Alphaproteobacteria;o__Rhodospirillales;f__Rhodospirillaceae;g__Magnetospirillum;s__Magnetospirillum_magneticum
OTU600	0	0	4	0	0	0	0	3	0	0	d__unclassified;k__unclassified;p__unclassified;c__unclassified;o__unclassified;f__unclassified;g__unclassified;s__unclassified
OTU601	0	0	0	0	0	0	0	4	0	0	d__Eukaryota;k__Viridiplantae;p__Streptophyta;c__Liliopsida;o__Poales;f__Poaceae;g__Triticum;s__Triticum_aestivum
OTU602	0	0	0	0	0	0	0	15	0	0	d__unclassified;k__unclassified;p__unclassified;c__unclassified;o__unclassified;f__unclassified;g__unclassified;s__unclassified
OTU603	0	0	1	2	0	0	0	50	0	0	d__unclassified;k__unclassified;p__unclassified;c__unclassified;o__unclassified;f__unclassified;g__unclassified;s__unclassified
OTU604	0	0	2	0	0	0	0	13	0	0	d__unclassified;k__unclassified;p__unclassified;c__unclassified;o__unclassified;f__unclassified;g__unclassified;s__unclassified
OTU605	0	0	13	0	0	0	0	82	0	0	d__Bacteria;k__unclassified_d__Bacteria;p__Bacteroidetes;c__Flavobacteriia;o__Flavobacteriales;f__Flavobacteriaceae;g__Sediminicola;s__Sediminicola_sp._YIK13
OTU606	0	0	0	0	0	0	0	30	0	0	d__Bacteria;k__unclassified_d__Bacteria;p__unclassified_d__Bacteria;c__unclassified_d__Bacteria;o__unclassified_d__Bacteria;f__unclassified_d__Bacteria;g__unclassified_d__Bacteria;s__uncultured_nitrogen-fixing_bacterium
OTU607	0	0	2	0	0	0	0	5	0	0	d__unclassified;k__unclassified;p__unclassified;c__unclassified;o__unclassified;f__unclassified;g__unclassified;s__unclassified
OTU608	0	0	0	0	1	0	2	4	0	0	d__Bacteria;k__unclassified_d__Bacteria;p__Proteobacteria;c__Betaproteobacteria;o__Burkholderiales;f__unclassified_o__Burkholderiales;g__Paucibacter;s__Paucibacter_sp._KCTC_42545
OTU609	1	0	6	13	1	1	0	9	5	0	d__unclassified;k__unclassified;p__unclassified;c__unclassified;o__unclassified;f__unclassified;g__unclassified;s__unclassified
OTU610	0	0	0	0	1	0	3	7	0	0	d__Bacteria;k__unclassified_d__Bacteria;p__Proteobacteria;c__Gammaproteobacteria;o__Pseudomonadales;f__Pseudomonadaceae;g__Pseudomonas;s__Pseudomonas_aeruginosa
OTU611	0	0	0	0	1	0	2	2	0	0	d__Bacteria;k__unclassified_d__Bacteria;p__unclassified_d__Bacteria;c__unclassified_d__Bacteria;o__unclassified_d__Bacteria;f__unclassified_d__Bacteria;g__unclassified_d__Bacteria;s__uncultured_bacterium
OTU612	0	10	0	2	0	0	0	6	5	0	d__Bacteria;k__unclassified_d__Bacteria;p__Proteobacteria;c__Alphaproteobacteria;o__Rhodobacterales;f__Hyphomonadaceae;g__Hyphomonas;s__Hyphomonas_neptunium
OTU613	0	0	2	0	0	0	0	3	0	0	d__unclassified;k__unclassified;p__unclassified;c__unclassified;o__unclassified;f__unclassified;g__unclassified;s__unclassified
OTU614	0	0	0	0	0	0	0	4	0	0	d__unclassified;k__unclassified;p__unclassified;c__unclassified;o__unclassified;f__unclassified;g__unclassified;s__unclassified
OTU615	0	0	0	0	0	0	0	72	0	0	d__unclassified;k__unclassified;p__unclassified;c__unclassified;o__unclassified;f__unclassified;g__unclassified;s__unclassified
OTU616	0	0	8	0	0	0	0	6	0	0	d__unclassified;k__unclassified;p__unclassified;c__unclassified;o__unclassified;f__unclassified;g__unclassified;s__unclassified
OTU617	0	0	1	0	0	0	0	18	0	0	d__Bacteria;k__unclassified_d__Bacteria;p__Proteobacteria;c__Gammaproteobacteria;o__Alteromonadales;f__Pseudoalteromonadaceae;g__Pseudoalteromonas;s__Pseudoalteromonas_piscicida
OTU618	0	0	4	0	0	0	0	14	0	0	d__unclassified;k__unclassified;p__unclassified;c__unclassified;o__unclassified;f__unclassified;g__unclassified;s__unclassified
OTU619	0	0	0	0	19	0	147	421	0	0	d__Bacteria;k__unclassified_d__Bacteria;p__unclassified_d__Bacteria;c__unclassified_d__Bacteria;o__unclassified_d__Bacteria;f__unclassified_d__Bacteria;g__unclassified_d__Bacteria;s__uncultured_bacterium
OTU620	0	0	0	0	0	0	0	14	0	0	d__Bacteria;k__unclassified_d__Bacteria;p__Proteobacteria;c__Alphaproteobacteria;o__Rhizobiales;f__Bradyrhizobiaceae;g__Bradyrhizobium;s__Bradyrhizobium_sp._STM_3082
OTU621	0	0	13	0	0	0	0	783	0	0	d__Bacteria;k__unclassified_d__Bacteria;p__unclassified_d__Bacteria;c__unclassified_d__Bacteria;o__unclassified_d__Bacteria;f__unclassified_d__Bacteria;g__unclassified_d__Bacteria;s__uncultured_bacterium
OTU622	0	0	4	0	0	0	0	10	0	0	d__unclassified;k__unclassified;p__unclassified;c__unclassified;o__unclassified;f__unclassified;g__unclassified;s__unclassified
OTU623	0	0	0	0	6	0	0	19	0	0	d__Bacteria;k__unclassified_d__Bacteria;p__unclassified_d__Bacteria;c__unclassified_d__Bacteria;o__unclassified_d__Bacteria;f__unclassified_d__Bacteria;g__unclassified_d__Bacteria;s__uncultured_nitrogen-fixing_bacterium
OTU624	0	0	4	0	0	0	0	32	0	0	d__Bacteria;k__unclassified_d__Bacteria;p__Actinobacteria_d__Bacteria;c__Actinobacteria_p__Actinobacteria;o__Pseudonocardiales;f__Pseudonocardiaceae;g__Pseudonocardia;s__Pseudonocardia_sp._AL041005-10
OTU625	0	0	0	0	0	0	0	29	0	0	d__unclassified;k__unclassified_d__unclassified;p__unclassified_d__unclassified;c__unclassified_d__unclassified;o__unclassified_d__unclassified;f__unclassified_d__unclassified;g__unclassified_d__unclassified;s__uncultured_microorganism
OTU626	0	0	0	0	0	0	0	9	1	0	d__Bacteria;k__unclassified_d__Bacteria;p__Proteobacteria;c__Betaproteobacteria;o__Burkholderiales;f__Comamonadaceae;g__Ramlibacter;s__Ramlibacter_tataouinensis
OTU627	0	0	0	0	10	0	38	25	0	0	d__Bacteria;k__unclassified_d__Bacteria;p__Proteobacteria;c__Betaproteobacteria;o__Burkholderiales;f__Comamonadaceae;g__Rhodoferax;s__Rhodoferax_sp._DCY110
OTU628	0	5	0	5	3	1	0	1	0	0	d__Bacteria;k__unclassified_d__Bacteria;p__Proteobacteria;c__Alphaproteobacteria;o__Rhodospirillales;f__Rhodospirillaceae;g__Pararhodospirillum;s__Pararhodospirillum_photometricum
OTU629	0	0	13	0	0	0	0	2	0	0	d__Bacteria;k__unclassified_d__Bacteria;p__Actinobacteria_d__Bacteria;c__Actinobacteria_p__Actinobacteria;o__Frankiales;f__Frankiaceae;g__Frankia;s__uncultured_Frankia_sp.
OTU630	0	7	4	2	1	0	0	5	0	0	d__unclassified;k__unclassified;p__unclassified;c__unclassified;o__unclassified;f__unclassified;g__unclassified;s__unclassified
OTU631	0	0	0	0	0	0	0	12	0	0	d__unclassified;k__unclassified;p__unclassified;c__unclassified;o__unclassified;f__unclassified;g__unclassified;s__unclassified
OTU632	0	0	1	0	1	0	0	11	0	0	d__Bacteria;k__unclassified_d__Bacteria;p__Proteobacteria;c__Alphaproteobacteria;o__Rhodobacterales;f__Rhodobacteraceae;g__Thiobacimonas;s__Thiobacimonas_profunda
OTU633	0	0	0	0	0	0	10	0	64	97	d__unclassified;k__unclassified;p__unclassified;c__unclassified;o__unclassified;f__unclassified;g__unclassified;s__unclassified
OTU634	0	0	0	0	0	0	462	0	0	279	d__unclassified;k__unclassified;p__unclassified;c__unclassified;o__unclassified;f__unclassified;g__unclassified;s__unclassified
OTU635	0	0	0	0	0	0	7	0	0	0	d__unclassified;k__unclassified;p__unclassified;c__unclassified;o__unclassified;f__unclassified;g__unclassified;s__unclassified
OTU636	0	0	0	0	0	0	2	0	0	0	d__unclassified;k__unclassified;p__unclassified;c__unclassified;o__unclassified;f__unclassified;g__unclassified;s__unclassified
OTU637	0	0	0	0	0	0	2	0	0	0	d__unclassified;k__unclassified;p__unclassified;c__unclassified;o__unclassified;f__unclassified;g__unclassified;s__unclassified
OTU638	0	0	0	0	0	0	11	0	0	0	d__unclassified;k__unclassified;p__unclassified;c__unclassified;o__unclassified;f__unclassified;g__unclassified;s__unclassified
OTU639	0	0	7	0	1	0	28	38	0	0	d__Bacteria;k__unclassified_d__Bacteria;p__Proteobacteria;c__Alphaproteobacteria;o__Rhizobiales;f__unclassified_o__Rhizobiales;g__Hartmannibacter;s__Hartmannibacter_diazotrophicus
OTU640	3	0	0	0	849	0	2779	2503	0	0	d__unclassified;k__unclassified_d__unclassified;p__unclassified_d__unclassified;c__unclassified_d__unclassified;o__unclassified_d__unclassified;f__unclassified_d__unclassified;g__unclassified_d__unclassified;s__uncultured_microorganism
OTU641	0	0	0	0	0	0	6	0	0	0	d__unclassified;k__unclassified;p__unclassified;c__unclassified;o__unclassified;f__unclassified;g__unclassified;s__unclassified
OTU642	0	0	0	0	9	0	38	8	0	0	d__Bacteria;k__unclassified_d__Bacteria;p__Proteobacteria;c__Alphaproteobacteria;o__Sphingomonadales;f__Sphingomonadaceae;g__Sphingobium;s__Sphingobium_hydrophobicum
OTU643	0	0	0	0	1	0	3	0	0	0	d__Bacteria;k__unclassified_d__Bacteria;p__Proteobacteria;c__Alphaproteobacteria;o__Rhizobiales;f__Bradyrhizobiaceae;g__Afipia;s__Afipia_sp._GAS231
OTU644	0	0	0	0	0	0	1	2	0	0	d__Bacteria;k__unclassified_d__Bacteria;p__Proteobacteria;c__Alphaproteobacteria;o__Rhizobiales;f__Chelatococcaceae;g__Chelatococcus;s__Chelatococcus_sp._CO-6
OTU645	2	0	0	0	14	0	43	0	0	0	d__unclassified;k__unclassified_d__unclassified;p__unclassified_d__unclassified;c__unclassified_d__unclassified;o__unclassified_d__unclassified;f__unclassified_d__unclassified;g__unclassified_d__unclassified;s__uncultured_microorganism
OTU646	0	0	0	0	0	0	16	0	0	0	d__Eukaryota;k__unclassified_d__Eukaryota;p__unclassified_d__Eukaryota;c__unclassified_d__Eukaryota;o__Kinetoplastida;f__Bodonidae;g__Dimastigella;s__Dimastigella_trypaniformis
OTU647	0	0	0	0	0	0	17	0	0	3	d__unclassified;k__unclassified;p__unclassified;c__unclassified;o__unclassified;f__unclassified;g__unclassified;s__unclassified
OTU648	0	0	0	0	5	0	11	19	0	0	d__Bacteria;k__unclassified_d__Bacteria;p__Cyanobacteria;c__unclassified_p__Cyanobacteria;o__Nostocales;f__Nostocaceae;g__Nostoc;s__Nostoc_punctiforme
OTU649	0	0	0	0	0	0	44	0	0	12	d__unclassified;k__unclassified;p__unclassified;c__unclassified;o__unclassified;f__unclassified;g__unclassified;s__unclassified
OTU650	5	0	0	0	170	0	492	365	0	0	d__unclassified;k__unclassified_d__unclassified;p__unclassified_d__unclassified;c__unclassified_d__unclassified;o__unclassified_d__unclassified;f__unclassified_d__unclassified;g__unclassified_d__unclassified;s__uncultured_microorganism
OTU651	7	3	0	7	1560	0	3491	3044	0	0	d__Bacteria;k__unclassified_d__Bacteria;p__Proteobacteria;c__Betaproteobacteria;o__Neisseriales;f__Neisseriaceae;g__Vitreoscilla;s__Vitreoscilla_filiformis
OTU652	1	17	0	31	1390	15	1631	1106	0	0	d__Bacteria;k__unclassified_d__Bacteria;p__unclassified_d__Bacteria;c__unclassified_d__Bacteria;o__unclassified_d__Bacteria;f__unclassified_d__Bacteria;g__unclassified_d__Bacteria;s__uncultured_soil_bacterium
OTU653	0	0	0	0	0	0	5	0	5	17	d__Bacteria;k__unclassified_d__Bacteria;p__Planctomycetes;c__Planctomycetia;o__Planctomycetales;f__Isosphaeraceae;g__Isosphaera;s__Isosphaera_pallida
OTU654	0	0	0	0	0	0	5	0	0	0	d__unclassified;k__unclassified;p__unclassified;c__unclassified;o__unclassified;f__unclassified;g__unclassified;s__unclassified
OTU655	0	0	0	0	0	0	10	0	30	68	d__Archaea;k__unclassified_d__Archaea;p__Euryarchaeota;c__unclassified_p__Euryarchaeota;o__unclassified_p__Euryarchaeota;f__unclassified_p__Euryarchaeota;g__unclassified_p__Euryarchaeota;s__uncultured_marine_group_II/III_euryarchaeote_KM3_102_C05
OTU656	0	0	0	0	0	0	12	0	0	2	d__unclassified;k__unclassified;p__unclassified;c__unclassified;o__unclassified;f__unclassified;g__unclassified;s__unclassified
OTU657	0	0	0	0	0	0	118	1	0	78	d__unclassified;k__unclassified;p__unclassified;c__unclassified;o__unclassified;f__unclassified;g__unclassified;s__unclassified
OTU658	0	3	9	3	0	8	1	0	0	0	d__Bacteria;k__unclassified_d__Bacteria;p__Actinobacteria_d__Bacteria;c__Actinobacteria_p__Actinobacteria;o__Micrococcales;f__Micrococcaceae;g__Kocuria;s__Kocuria_turfanensis
OTU659	0	0	0	0	0	0	27	0	0	0	d__Archaea;k__unclassified_d__Archaea;p__Euryarchaeota;c__unclassified_p__Euryarchaeota;o__unclassified_p__Euryarchaeota;f__unclassified_p__Euryarchaeota;g__unclassified_p__Euryarchaeota;s__uncultured_marine_group_II/III_euryarchaeote_AD1000_41_D11
OTU660	0	0	0	0	2	0	6	2	0	0	d__Bacteria;k__unclassified_d__Bacteria;p__Proteobacteria;c__Alphaproteobacteria;o__Sphingomonadales;f__Sphingomonadaceae;g__Sphingomonas;s__Sphingomonas_sp._DC-6
OTU661	0	0	0	0	0	0	4	0	0	0	d__unclassified;k__unclassified;p__unclassified;c__unclassified;o__unclassified;f__unclassified;g__unclassified;s__unclassified
OTU662	0	0	0	0	0	0	5	0	0	0	d__unclassified;k__unclassified;p__unclassified;c__unclassified;o__unclassified;f__unclassified;g__unclassified;s__unclassified
OTU663	0	0	0	0	0	0	2	0	5	7	d__unclassified;k__unclassified;p__unclassified;c__unclassified;o__unclassified;f__unclassified;g__unclassified;s__unclassified
OTU664	0	0	0	0	1	0	25	2	0	0	d__Bacteria;k__unclassified_d__Bacteria;p__unclassified_d__Bacteria;c__unclassified_d__Bacteria;o__unclassified_d__Bacteria;f__unclassified_d__Bacteria;g__unclassified_d__Bacteria;s__uncultured_bacterium
OTU665	0	0	0	0	0	0	9	0	0	0	d__unclassified;k__unclassified;p__unclassified;c__unclassified;o__unclassified;f__unclassified;g__unclassified;s__unclassified
OTU666	0	0	0	0	1	0	14	2	0	0	d__Bacteria;k__unclassified_d__Bacteria;p__Proteobacteria;c__Alphaproteobacteria;o__Sphingomonadales;f__Erythrobacteraceae;g__Porphyrobacter;s__Porphyrobacter_sp._LM_6
OTU667	16	1	0	1	109	58	16	42	26	0	d__unclassified;k__unclassified;p__unclassified;c__unclassified;o__unclassified;f__unclassified;g__unclassified;s__unclassified
OTU668	0	0	0	0	0	0	4	0	0	0	d__unclassified;k__unclassified;p__unclassified;c__unclassified;o__unclassified;f__unclassified;g__unclassified;s__unclassified
OTU669	0	0	0	0	1	0	6	3	2	0	d__unclassified;k__unclassified;p__unclassified;c__unclassified;o__unclassified;f__unclassified;g__unclassified;s__unclassified
OTU670	0	0	0	0	0	0	1	0	7	5	d__unclassified;k__unclassified;p__unclassified;c__unclassified;o__unclassified;f__unclassified;g__unclassified;s__unclassified
OTU671	0	0	0	0	2	0	41	28	0	0	d__Bacteria;k__unclassified_d__Bacteria;p__unclassified_d__Bacteria;c__unclassified_d__Bacteria;o__unclassified_d__Bacteria;f__unclassified_d__Bacteria;g__unclassified_d__Bacteria;s__uncultured_bacterium
OTU672	0	0	0	0	0	0	259	0	0	309	d__unclassified;k__unclassified;p__unclassified;c__unclassified;o__unclassified;f__unclassified;g__unclassified;s__unclassified
OTU673	0	0	0	0	0	0	5	0	0	3	d__unclassified;k__unclassified;p__unclassified;c__unclassified;o__unclassified;f__unclassified;g__unclassified;s__unclassified
OTU674	0	0	35	0	11	0	98	94	0	0	d__Bacteria;k__unclassified_d__Bacteria;p__Proteobacteria;c__Betaproteobacteria;o__Rhodocyclales;f__Rhodocyclaceae;g__Azospira;s__Azospira_oryzae
OTU675	0	0	0	0	1	0	20	7	3	0	d__Bacteria;k__unclassified_d__Bacteria;p__Proteobacteria;c__Alphaproteobacteria;o__Rhizobiales;f__Bradyrhizobiaceae;g__Oligotropha;s__Oligotropha_carboxidovorans
OTU676	0	0	0	0	0	0	15	0	0	0	d__unclassified;k__unclassified;p__unclassified;c__unclassified;o__unclassified;f__unclassified;g__unclassified;s__unclassified
OTU677	0	0	0	0	0	0	6	0	0	0	d__unclassified;k__unclassified;p__unclassified;c__unclassified;o__unclassified;f__unclassified;g__unclassified;s__unclassified
OTU678	0	0	0	0	13	0	27	28	0	0	d__Bacteria;k__unclassified_d__Bacteria;p__unclassified_d__Bacteria;c__unclassified_d__Bacteria;o__unclassified_d__Bacteria;f__unclassified_d__Bacteria;g__unclassified_d__Bacteria;s__uncultured_bacterium
OTU679	0	0	0	0	0	0	35	0	0	9	d__unclassified;k__unclassified;p__unclassified;c__unclassified;o__unclassified;f__unclassified;g__unclassified;s__unclassified
OTU680	0	0	1	0	2	0	4	0	0	0	d__unclassified;k__unclassified;p__unclassified;c__unclassified;o__unclassified;f__unclassified;g__unclassified;s__unclassified
OTU681	0	0	0	0	0	0	8	0	0	21	d__unclassified;k__unclassified;p__unclassified;c__unclassified;o__unclassified;f__unclassified;g__unclassified;s__unclassified
OTU682	0	0	0	0	53	0	134	25	0	0	d__Bacteria;k__unclassified_d__Bacteria;p__Proteobacteria;c__Alphaproteobacteria;o__Sphingomonadales;f__Sphingomonadaceae;g__Sphingobium;s__Sphingobium_sp._SYK-6
OTU683	0	0	0	0	0	0	27	0	1	16	d__unclassified;k__unclassified;p__unclassified;c__unclassified;o__unclassified;f__unclassified;g__unclassified;s__unclassified
OTU684	0	0	0	0	0	0	2	0	0	7	d__unclassified;k__unclassified;p__unclassified;c__unclassified;o__unclassified;f__unclassified;g__unclassified;s__unclassified
OTU685	0	0	0	0	0	0	114	0	0	122	d__unclassified;k__unclassified;p__unclassified;c__unclassified;o__unclassified;f__unclassified;g__unclassified;s__unclassified
OTU686	0	0	0	0	0	0	4	0	0	0	d__unclassified;k__unclassified;p__unclassified;c__unclassified;o__unclassified;f__unclassified;g__unclassified;s__unclassified
OTU687	0	0	0	0	0	0	8	0	1	4	d__unclassified;k__unclassified;p__unclassified;c__unclassified;o__unclassified;f__unclassified;g__unclassified;s__unclassified
OTU688	0	0	0	0	0	0	58	0	0	109	d__unclassified;k__unclassified;p__unclassified;c__unclassified;o__unclassified;f__unclassified;g__unclassified;s__unclassified
OTU689	0	0	0	0	0	0	100	0	0	43	d__unclassified;k__unclassified;p__unclassified;c__unclassified;o__unclassified;f__unclassified;g__unclassified;s__unclassified
OTU690	0	0	0	0	0	0	13	0	0	6	d__unclassified;k__unclassified;p__unclassified;c__unclassified;o__unclassified;f__unclassified;g__unclassified;s__unclassified
OTU691	0	0	0	0	0	0	45	0	0	5	d__unclassified;k__unclassified;p__unclassified;c__unclassified;o__unclassified;f__unclassified;g__unclassified;s__unclassified
OTU692	0	0	1	0	0	0	2	4	0	0	d__Bacteria;k__unclassified_d__Bacteria;p__Proteobacteria;c__Alphaproteobacteria;o__Rhizobiales;f__Methylobacteriaceae;g__Methylobacterium;s__Methylobacterium_sp._C1
OTU693	0	0	0	0	0	0	101	0	3	230	d__Bacteria;k__unclassified_d__Bacteria;p__Actinobacteria_d__Bacteria;c__Actinobacteria_p__Actinobacteria;o__Micromonosporales;f__Micromonosporaceae;g__Micromonospora;s__Micromonospora_krabiensis
OTU694	0	0	0	0	2	0	13	1	0	0	d__Bacteria;k__unclassified_d__Bacteria;p__Proteobacteria;c__Alphaproteobacteria;o__Sphingomonadales;f__Sphingomonadaceae;g__Sphingomonas;s__Sphingomonas_taxi
OTU695	0	0	0	0	0	0	3	0	0	1	d__unclassified;k__unclassified;p__unclassified;c__unclassified;o__unclassified;f__unclassified;g__unclassified;s__unclassified
OTU696	0	0	0	0	4	0	0	0	0	0	d__unclassified;k__unclassified;p__unclassified;c__unclassified;o__unclassified;f__unclassified;g__unclassified;s__unclassified
OTU697	26	43	2	80	44	2	0	0	0	0	d__Bacteria;k__unclassified_d__Bacteria;p__Proteobacteria;c__Alphaproteobacteria;o__Rhizobiales;f__Bradyrhizobiaceae;g__Bradyrhizobium;s__Bradyrhizobium_sp._ORS_285
OTU698	0	0	0	0	8	0	0	10	0	0	d__Bacteria;k__unclassified_d__Bacteria;p__unclassified_d__Bacteria;c__unclassified_d__Bacteria;o__unclassified_d__Bacteria;f__unclassified_d__Bacteria;g__unclassified_d__Bacteria;s__uncultured_bacterium
OTU699	61	9	0	10	32	25	0	1	0	0	d__unclassified;k__unclassified;p__unclassified;c__unclassified;o__unclassified;f__unclassified;g__unclassified;s__unclassified
OTU700	51	40	0	22	30	11	0	0	0	0	d__Bacteria;k__unclassified_d__Bacteria;p__Proteobacteria;c__Alphaproteobacteria;o__Rhizobiales;f__unclassified_o__Rhizobiales;g__unclassified_o__Rhizobiales;s__Rhizobiales_bacterium_NRL2
OTU701	1	6	0	3	10	12	0	3	0	0	d__Bacteria;k__unclassified_d__Bacteria;p__unclassified_d__Bacteria;c__unclassified_d__Bacteria;o__unclassified_d__Bacteria;f__unclassified_d__Bacteria;g__unclassified_d__Bacteria;s__uncultured_bacterium
OTU702	0	4	0	0	10	0	0	0	0	0	d__unclassified;k__unclassified;p__unclassified;c__unclassified;o__unclassified;f__unclassified;g__unclassified;s__unclassified
OTU703	0	0	0	0	8	7	0	0	0	0	d__Bacteria;k__unclassified_d__Bacteria;p__Proteobacteria;c__Alphaproteobacteria;o__Sphingomonadales;f__Erythrobacteraceae;g__Porphyrobacter;s__Porphyrobacter_neustonensis
OTU704	3	3	0	1	3	0	0	0	0	0	d__unclassified;k__unclassified;p__unclassified;c__unclassified;o__unclassified;f__unclassified;g__unclassified;s__unclassified
OTU705	2	35	0	0	32	0	0	0	0	0	d__Bacteria;k__unclassified_d__Bacteria;p__unclassified_d__Bacteria;c__unclassified_d__Bacteria;o__unclassified_d__Bacteria;f__unclassified_d__Bacteria;g__unclassified_d__Bacteria;s__uncultured_bacterium
OTU706	5	3	0	2	3	0	0	0	0	0	d__unclassified;k__unclassified;p__unclassified;c__unclassified;o__unclassified;f__unclassified;g__unclassified;s__unclassified
OTU707	8	106	0	7	218	10	0	0	0	0	d__Bacteria;k__unclassified_d__Bacteria;p__Proteobacteria;c__Gammaproteobacteria;o__Xanthomonadales;f__Xanthomonadaceae;g__Lysobacter;s__Lysobacter_capsici
OTU708	36	0	0	0	32	17	0	0	0	0	d__unclassified;k__unclassified;p__unclassified;c__unclassified;o__unclassified;f__unclassified;g__unclassified;s__unclassified
OTU709	1	0	0	0	1	0	0	0	0	0	d__unclassified;k__unclassified;p__unclassified;c__unclassified;o__unclassified;f__unclassified;g__unclassified;s__unclassified
OTU710	0	0	0	0	222	0	0	1	0	0	d__Bacteria;k__unclassified_d__Bacteria;p__unclassified_d__Bacteria;c__unclassified_d__Bacteria;o__unclassified_d__Bacteria;f__unclassified_d__Bacteria;g__unclassified_d__Bacteria;s__uncultured_marine_bacterium
OTU711	0	0	0	0	43	0	0	46	0	0	d__unclassified;k__unclassified_d__unclassified;p__unclassified_d__unclassified;c__unclassified_d__unclassified;o__unclassified_d__unclassified;f__unclassified_d__unclassified;g__unclassified_d__unclassified;s__uncultured_microorganism
OTU712	14	28	0	20	20	3	1	0	4	0	d__unclassified;k__unclassified;p__unclassified;c__unclassified;o__unclassified;f__unclassified;g__unclassified;s__unclassified
OTU713	1	0	0	0	2	0	0	0	0	0	d__unclassified;k__unclassified;p__unclassified;c__unclassified;o__unclassified;f__unclassified;g__unclassified;s__unclassified
OTU714	6	3	0	25	2	0	0	0	0	0	d__unclassified;k__unclassified;p__unclassified;c__unclassified;o__unclassified;f__unclassified;g__unclassified;s__unclassified
OTU715	6	13	0	1	5	0	0	0	0	0	d__unclassified;k__unclassified;p__unclassified;c__unclassified;o__unclassified;f__unclassified;g__unclassified;s__unclassified
OTU716	8	34	0	2	43	3	0	0	0	0	d__unclassified;k__unclassified;p__unclassified;c__unclassified;o__unclassified;f__unclassified;g__unclassified;s__unclassified
OTU717	0	20	0	2	5	0	0	0	0	0	d__unclassified;k__unclassified;p__unclassified;c__unclassified;o__unclassified;f__unclassified;g__unclassified;s__unclassified
OTU718	0	0	0	0	12	42	0	0	0	0	d__Bacteria;k__unclassified_d__Bacteria;p__unclassified_d__Bacteria;c__unclassified_d__Bacteria;o__unclassified_d__Bacteria;f__unclassified_d__Bacteria;g__unclassified_d__Bacteria;s__uncultured_bacterium
OTU719	1	1	5	1	70	0	169	150	0	0	d__Eukaryota;k__Viridiplantae;p__Streptophyta;c__Liliopsida;o__Poales;f__Poaceae;g__Triticum;s__Triticum_aestivum
OTU720	6	1	0	0	40	12	0	0	0	0	d__unclassified;k__unclassified;p__unclassified;c__unclassified;o__unclassified;f__unclassified;g__unclassified;s__unclassified
OTU721	12	7	0	3	3	0	0	0	0	0	d__unclassified;k__unclassified;p__unclassified;c__unclassified;o__unclassified;f__unclassified;g__unclassified;s__unclassified
OTU722	0	0	0	0	1	0	3	0	0	0	d__Bacteria;k__unclassified_d__Bacteria;p__Proteobacteria;c__Alphaproteobacteria;o__Rhizobiales;f__Methylobacteriaceae;g__Methylobacterium;s__Methylobacterium_extorquens
OTU723	9	0	0	71	33	0	0	0	0	0	d__Bacteria;k__unclassified_d__Bacteria;p__Proteobacteria;c__Gammaproteobacteria;o__Cellvibrionales;f__Cellvibrionaceae;g__Teredinibacter;s__Teredinibacter_turnerae
OTU724	0	18	0	9	1	0	0	0	0	0	d__unclassified;k__unclassified;p__unclassified;c__unclassified;o__unclassified;f__unclassified;g__unclassified;s__unclassified
OTU725	9	1	0	0	4	0	0	0	0	0	d__Bacteria;k__unclassified_d__Bacteria;p__Proteobacteria;c__Deltaproteobacteria;o__Desulfuromonadales;f__Geobacteraceae;g__Geobacter;s__Geobacter_sp._M18
OTU726	0	0	0	0	7	0	0	0	0	0	d__unclassified;k__unclassified;p__unclassified;c__unclassified;o__unclassified;f__unclassified;g__unclassified;s__unclassified
OTU727	1	0	0	1	8	10	1	4	1	0	d__Bacteria;k__unclassified_d__Bacteria;p__unclassified_d__Bacteria;c__unclassified_d__Bacteria;o__unclassified_d__Bacteria;f__unclassified_d__Bacteria;g__unclassified_d__Bacteria;s__uncultured_bacterium_HF0500_31I04
OTU728	20	9	0	7	2	0	0	0	0	0	d__Bacteria;k__unclassified_d__Bacteria;p__Proteobacteria;c__Alphaproteobacteria;o__Rhizobiales;f__Methylobacteriaceae;g__Methylobacterium;s__Methylobacterium_sp._AMS5
OTU729	0	0	0	0	22	0	0	0	0	0	d__Bacteria;k__unclassified_d__Bacteria;p__Proteobacteria;c__Deltaproteobacteria;o__Desulfovibrionales;f__Desulfovibrionaceae;g__Pseudodesulfovibrio;s__Pseudodesulfovibrio_indicus
OTU730	0	1	0	0	2	0	0	0	0	0	d__unclassified;k__unclassified;p__unclassified;c__unclassified;o__unclassified;f__unclassified;g__unclassified;s__unclassified
OTU731	8	1	0	0	1	0	0	0	0	0	d__unclassified;k__unclassified_d__unclassified;p__unclassified_d__unclassified;c__unclassified_d__unclassified;o__unclassified_d__unclassified;f__unclassified_d__unclassified;g__unclassified_d__unclassified;s__uncultured_marine_organism
OTU732	0	0	0	0	10	0	0	0	0	0	d__Bacteria;k__unclassified_d__Bacteria;p__unclassified_d__Bacteria;c__unclassified_d__Bacteria;o__unclassified_d__Bacteria;f__unclassified_d__Bacteria;g__unclassified_d__Bacteria;s__uncultured_bacterium
OTU733	2101	296	38	311	196	32	0	2	0	0	d__unclassified;k__unclassified;p__unclassified;c__unclassified;o__unclassified;f__unclassified;g__unclassified;s__unclassified
OTU734	0	5	0	23	5	1	0	0	0	0	d__unclassified;k__unclassified;p__unclassified;c__unclassified;o__unclassified;f__unclassified;g__unclassified;s__unclassified
OTU735	0	0	0	0	12	0	0	0	0	0	d__unclassified;k__unclassified;p__unclassified;c__unclassified;o__unclassified;f__unclassified;g__unclassified;s__unclassified
OTU736	1	0	0	0	1	0	5	4	5	0	d__Bacteria;k__unclassified_d__Bacteria;p__Proteobacteria;c__Alphaproteobacteria;o__Rhodobacterales;f__Rhodobacteraceae;g__Phaeobacter;s__Phaeobacter_gallaeciensis
OTU737	1	0	0	6	2	0	3	0	17	0	d__Bacteria;k__unclassified_d__Bacteria;p__Proteobacteria;c__Alphaproteobacteria;o__Sphingomonadales;f__Sphingomonadaceae;g__Sphingobium;s__Sphingobium_hydrophobicum
OTU738	1	0	0	3	7	1	0	0	0	0	d__Bacteria;k__unclassified_d__Bacteria;p__unclassified_d__Bacteria;c__unclassified_d__Bacteria;o__unclassified_d__Bacteria;f__unclassified_d__Bacteria;g__unclassified_d__Bacteria;s__uncultured_bacterium
OTU739	20	4	0	1	8	7	0	0	0	0	d__Bacteria;k__unclassified_d__Bacteria;p__Proteobacteria;c__Alphaproteobacteria;o__Rhizobiales;f__Hyphomicrobiaceae;g__Blastochloris;s__Blastochloris_viridis
OTU740	42	569	0	52	827	22	0	0	0	0	d__unclassified;k__unclassified;p__unclassified;c__unclassified;o__unclassified;f__unclassified;g__unclassified;s__unclassified
OTU741	32	124	0	135	65	0	0	0	0	0	d__unclassified;k__unclassified;p__unclassified;c__unclassified;o__unclassified;f__unclassified;g__unclassified;s__unclassified
OTU742	0	7	0	13	2	1	0	0	0	0	d__unclassified;k__unclassified;p__unclassified;c__unclassified;o__unclassified;f__unclassified;g__unclassified;s__unclassified
OTU743	0	0	0	0	7	5	0	0	0	0	d__Bacteria;k__unclassified_d__Bacteria;p__Proteobacteria;c__Deltaproteobacteria;o__Desulfovibrionales;f__Desulfovibrionaceae;g__Pseudodesulfovibrio;s__Pseudodesulfovibrio_profundus
OTU744	1	0	0	0	6	4	0	0	0	0	d__Bacteria;k__unclassified_d__Bacteria;p__unclassified_d__Bacteria;c__unclassified_d__Bacteria;o__unclassified_d__Bacteria;f__unclassified_d__Bacteria;g__unclassified_d__Bacteria;s__uncultured_bacterium
OTU745	0	1	0	0	3	0	0	0	0	0	d__Bacteria;k__unclassified_d__Bacteria;p__Proteobacteria;c__Gammaproteobacteria;o__Oceanospirillales;f__Halomonadaceae;g__Halomonas;s__Halomonas_beimenensis
OTU746	0	0	0	0	31	0	0	0	0	0	d__Bacteria;k__unclassified_d__Bacteria;p__unclassified_d__Bacteria;c__unclassified_d__Bacteria;o__unclassified_d__Bacteria;f__unclassified_d__Bacteria;g__unclassified_d__Bacteria;s__uncultured_bacterium
OTU747	0	0	0	0	5	4	0	0	0	0	d__Bacteria;k__unclassified_d__Bacteria;p__unclassified_d__Bacteria;c__unclassified_d__Bacteria;o__unclassified_d__Bacteria;f__unclassified_d__Bacteria;g__unclassified_d__Bacteria;s__uncultured_bacterium
OTU748	96	19	0	1	10	0	0	0	0	0	d__unclassified;k__unclassified;p__unclassified;c__unclassified;o__unclassified;f__unclassified;g__unclassified;s__unclassified
OTU749	3	24	0	0	100	2	0	0	0	0	d__unclassified;k__unclassified;p__unclassified;c__unclassified;o__unclassified;f__unclassified;g__unclassified;s__unclassified
