# Supplementary material for: Diversity, distribution and nitrogen use strategies of bacteria in the South China Sea basin
Source: Copernicus journal article supplement (doi:10.5194/bg-2018-529), 2019-02-12
Supplement: Supplementary file 3 [file Table S6.xlsx]

## Sheet: Sheet1
Table S7. Total COGs predicted based on the bacterial OTUs
COG ID	SEATs_surface	SEATs_68m	SEATs_200m	SEATs_750m	SS1_surface	SS1_105m	SS1_200m	SS1_750m	A2_surface	B1_surface	C1_surface			Description
COG0001	26961	15057	18893	17525	47702	46321	39025	39217	38134	30033	41745	360613	11732.7	Glutamate-1-semialdehyde aminotransferase
COG0002	33156	15530	16847	14990	54570	52900	35361	35516	42776	36433	51341	389420	14642.3	N-acetylglutamate semialdehyde dehydrogenase
COG0003	8131	3592	7885	6866	10079	18249	19965	22700	6975	9215	9014	122671	6193.85	ATPase required for the post-translational delivery of tail-anchored (TA) proteins to the endoplasmic reticulum. Recognizes and selectively binds the transmembrane domain of TA proteins in the cytosol. This complex then targets to the endoplasmic reticulum by membrane-bound receptors, where the tail- anchored protein is released for insertion. This process is regulated by ATP binding and hydrolys…
COG0004	46430	23772	30983	25244	68614	78128	62394	67303	51641	51578	67489	573576	18778.6	ammonium Transporter
COG0005	25732	13116	16221	10064	46148	49889	45446	47003	36309	29609	41699	361236	14706.2	The purine nucleoside phosphorylases catalyze the phosphorolytic breakdown of the N-glycosidic bond in the beta- (deoxy)ribonucleoside molecules, with the formation of the corresponding free purine bases and pentose-1-phosphate (By similarity)
COG0006	62271	28719	36628	35760	86528	91420	93042	95374	68067	68116	89678	755603	25164.2	peptidase M24
COG0007	26039	12973	10548	15449	46755	44872	19534	17977	36522	29114	40381	300164	13122	Multifunctional enzyme that catalyzes the SAM-dependent methylation of uroporphyrinogen III at position C-2 and C-7 to form precorrin-2 and then position C-12 or C-18 to form trimethylpyrrocorphin 2. It also catalyzes the conversion of precorrin-2 into siroheme. This reaction consists of the NAD- dependent oxidation of precorrin-2 into sirohydrochlorin and its subsequent ferrochelation into siroh…
COG0008	62057	34757	33830	36859	103588	92080	60455	60691	84000	67808	97458	733583	25178.1	Catalyzes the attachment of glutamate to tRNA(Glu) in a two-step reaction glutamate is first activated by ATP to form Glu-AMP and then transferred to the acceptor end of tRNA(Glu) (By similarity)
COG0009	38382	24274	26839	26079	59970	60216	47766	51589	47398	42154	57304	481971	13482.2	sua5 ycio yrdc ywlc family protein
COG0010	41546	22495	19659	16100	62736	71238	51757	54460	46537	46279	60326	493133	18364.4	hydrolase activity, acting on carbon-nitrogen (but not peptide) bonds, in linear amidines
COG0011	4042	1712	2842	3165	4124	7222	7369	7486	2654	3871	4350	48837	2024.79	Domain of unknown function DUF77
COG0012	33111	16826	16512	14922	54329	52355	34025	34985	42560	36248	51150	387023	14400.4	gtp-binding protein
COG0013	33260	17095	16974	15034	54458	52705	35290	36189	42750	36406	51334	391495	14372.8	Catalyzes the attachment of alanine to tRNA(Ala) in a two-step reaction alanine is first activated by ATP to form Ala- AMP and then transferred to the acceptor end of tRNA(Ala). Also edits incorrectly charged Ser-tRNA(Ala) and Gly-tRNA(Ala) via its editing domain (By similarity)
COG0014	32291	15677	13780	13643	53486	51634	26494	27826	41827	35387	50144	362189	15027.2	Catalyzes the NADPH dependent reduction of L-gamma- glutamyl 5-phosphate into L-glutamate 5-semialdehyde and phosphate. The product spontaneously undergoes cyclization to form 1-pyrroline-5-carboxylate (By similarity)
COG0015	35888	17753	16985	16172	57679	56056	35771	36977	44671	39243	53884	411079	15316	adenylosuccinate lyase
COG0016	33156	16829	16513	15852	54365	52426	34272	35311	42582	36296	51174	388776	14285.5	phenylalanyL-tRNA synthetase, alpha subunit
COG0017	2666	4563	4870	4544	2786	4536	12062	13731	3608	3284	3712	60362	3755.13	asparaginyl-tRNA synthetase
COG0018	33160	17021	16516	14923	54345	52355	34026	34992	42572	36274	51154	387338	14377.6	arginyL-tRNA synthetase
COG0019	44961	24303	24196	22857	66821	69290	58229	60661	52266	48597	66498	538679	17867.2	Specifically catalyzes the decarboxylation of meso- diaminopimelate (meso-DAP) to L-lysine (By similarity)
COG0020	35437	17513	17493	15978	57175	56792	36093	37260	44173	38618	53373	409905	15250.1	Catalyzes the condensation of isopentenyl diphosphate (IPP) with allylic pyrophosphates generating different type of terpenoids (By similarity)
COG0021	33080	16490	17536	16364	54244	53209	35972	36473	42646	36394	51068	393476	14197.4	Transketolase
COG0022	37864	18096	18679	19035	60081	52754	49495	39981	50294	40506	57007	443792	15584.2	Dehydrogenase, E1 component
COG0023	19659	10101	2497	3983	39063	32555	5243	6058	31275	21886	33866	206186	13783.3	translation initiation factor
COG0024	36733	20546	23565	22470	58494	58927	41572	41795	45994	40143	55148	445387	13911.4	Removes the N-terminal methionine from nascent proteins (By similarity)
COG0025	24264	15329	14201	16758	44037	42124	26330	28090	35982	27173	38958	313246	10643.1	Sodium hydrogen exchanger
COG0026	32354	16207	11311	11932	53629	50029	19094	19849	41623	35297	50200	341525	16162	phosphoribosylaminoimidazole carboxylase atpase subunit
COG0027	18755	10010	6307	6849	38275	31769	5133	4795	30517	20858	32711	205979	12812.3	Catalyzes two reactions the first one is the production of beta-formyl glycinamide ribonucleotide (GAR) from formate, ATP and beta GAR
COG0028	65184	34200	43652	38990	89809	99744	100801	100257	68537	71308	91323	803805	25409.8	acetolactate synthase
COG0029	22655	12081	11970	13710	42884	39779	21200	22184	34156	25364	36981	282964	11189.3	L-aspartate oxidase
COG0030	35391	17547	17294	15679	57093	56773	36028	36447	43866	38509	53298	407925	15280.2	Specifically dimethylates two adjacent adenosines (A1518 and A1519) in the loop of a conserved hairpin near the 3'-end of 16S rRNA in the 30S particle. May play a critical role in biogenesis of 30S subunits (By similarity)
COG0031	63008	32136	28961	25070	105456	100650	66710	68828	84429	69125	97574	741947	28795.8	cysteine biosynthetic process from serine
COG0033	17863	8431	2391	4190	37439	31515	6916	6854	29611	20096	31512	196818	12865.5	phosphoglucomutase
COG0034	33135	16828	16593	14979	54324	52365	34241	35308	42571	36244	51168	387756	14382.5	glutamine phosphoribosylpyrophosphate amidotransferase
COG0035	24399	13697	11600	12217	44557	39683	18049	18922	35650	27451	40151	286376	12213.2	Catalyzes the conversion of uracil and 5-phospho-alpha- D-ribose 1-diphosphate (PRPP) to UMP and diphosphate (By similarity)
COG0036	33129	16906	16753	15081	54506	52906	35093	35429	42718	36386	51251	390158	14439.8	ribulose-phosphate 3-epimerase activity
COG0037	35208	21304	25758	26257	56409	55699	47719	50628	45028	39013	54002	457025	12839.1	Ligates lysine onto the cytidine present at position 34 of the AUA codon-specific tRNA(Ile) that contains the anticodon CAU, in an ATP-dependent manner. Cytidine is converted to lysidine, thus changing the amino acid specificity of the tRNA from methionine to isoleucine (By similarity)
COG0038	25975	14061	9299	7970	45817	45184	29277	27008	36652	28796	41324	311363	13478.4	chloride channel
COG0039	16410	11012	17795	15402	18030	23479	38149	38999	14534	17592	21079	232481	9212.42	Catalyzes the reversible oxidation of malate to oxaloacetate (By similarity)
COG0040	33073	15412	16486	14855	54303	52322	33960	34930	42529	36185	51113	385168	14585.8	Catalyzes the condensation of ATP and 5-phosphoribose 1- diphosphate to form N'-(5'-phosphoribosyl)-ATP (PR-ATP). Has a crucial role in the pathway because the rate of histidine biosynthesis seems to be controlled primarily by regulation of HisG enzymatic activity (By similarity)
COG0041	33131	16831	16521	14951	54347	52401	34065	34998	42601	36264	51173	387283	14406.5	Catalyzes the conversion of N5-carboxyaminoimidazole ribonucleotide (N5-CAIR) to 4-carboxy-5-aminoimidazole ribonucleotide (CAIR) (By similarity)
COG0042	52802	30745	28387	32315	93661	85211	39902	43635	73827	58383	84968	623836	24108.5	Catalyzes the synthesis of dihydrouridine a modified base found in the D-loop of most tRNAs (By similarity)
COG0043	19350	8910	4723	5777	38959	33790	14347	13486	31166	21805	33388	225701	12195.5	Catalyzes the decarboxylation of 3-octaprenyl-4-hydroxy benzoate to 2-octaprenylphenol (By similarity)
COG0044	40122	18460	23325	17726	61847	70074	54827	55696	46266	44876	58644	491863	18033.9	Dihydroorotase
COG0045	16089	10566	16637	14893	17809	22238	35006	35444	13998	17296	20538	220514	8116.62	Succinyl-CoA synthetase subunit beta
COG0046	33142	16833	16556	14948	54339	52380	34252	35103	42580	36263	51150	387546	14393.3	phosphoribosylformylglycinamidine synthase
COG0047	32472	12716	11116	8272	53799	51715	32201	32776	41832	35657	50531	363087	16364.7	phosphoribosylformylglycinamidine synthase
COG0048	33122	16825	16512	14922	54330	52355	34025	34975	42560	36248	51150	387024	14400.5	Interacts with and stabilizes bases of the 16S rRNA that are involved in tRNA selection in the A site and with the mRNA backbone. Located at the interface of the 30S and 50S subunits, it traverses the body of the 30S subunit contacting proteins on the other side and probably holding the rRNA structure together. The combined cluster of proteins S8, S12 and S17 appears to hold together the shoulder…
COG0049	33097	16826	16512	14922	54327	52355	34025	34985	42560	36248	51150	387007	14400.3	One of the primary rRNA binding proteins, it binds directly to 16S rRNA where it nucleates assembly of the head domain of the 30S subunit. Is located at the subunit interface close to the decoding center, probably blocks exit of the E-site tRNA (By similarity)
COG0050	40710	21934	27890	25804	62959	60746	53255	54376	49888	44099	60555	502216	14832.8	This protein promotes the GTP-dependent binding of aminoacyl-tRNA to the A-site of ribosomes during protein biosynthesis (By similarity)
COG0051	33119	16826	16512	14922	54329	52355	34021	34975	42560	36246	51149	387014	14400.2	tRNA binding
COG0052	33119	16826	16512	14922	54329	52355	34021	34985	42560	36246	51149	387024	14400.2	30S ribosomal protein S2
COG0053	8865	8371	14160	14428	8570	15802	28412	28397	8030	9270	10361	154666	7597.3	cation diffusion facilitator family transporter
COG0054	33489	17011	16398	16057	54482	52165	33751	35411	42682	36619	51442	389507	14271.7	Catalyzes the formation of 6,7-dimethyl-8- ribityllumazine by condensation of 5-amino-6-(D- ribitylamino)uracil with 3,4-dihydroxy-2-butanone 4-phosphate. This is the penultimate step in the biosynthesis of riboflavin (By similarity)
COG0055	33667	17217	17085	15221	54820	52914	35703	36223	43076	36901	51624	394451	14432.5	Produces ATP from ADP in the presence of a proton gradient across the membrane. The catalytic sites are hosted primarily by the beta subunits (By similarity)
COG0056	33657	17021	17063	15219	54808	52896	35619	36158	43062	36895	51616	394014	14455.8	Produces ATP from ADP in the presence of a proton gradient across the membrane. The alpha chain is a regulatory subunit (By similarity)
COG0057	55947	31579	26480	30642	96616	88430	45797	48173	77519	62107	89085	652375	25401.3	glyceraldehyde3phosphate dehydrogenase
COG0058	22180	11448	8358	6338	42105	40745	22825	23251	33696	24866	36277	272089	12518.6	Phosphorylase is an important allosteric enzyme in carbohydrate metabolism. Enzymes from different sources differ in their regulatory mechanisms and in their natural substrates. However, all known phosphorylases share catalytic and structural properties (By similarity)
COG0059	33130	17065	16639	15272	54407	52207	33918	35500	42631	36389	51221	388379	14310.3	Alpha-keto-beta-hydroxylacyl reductoisomerase
COG0060	33291	17126	16536	14929	54495	52524	34109	35073	42640	36535	51334	388592	14423.8	amino acids such as valine, to avoid such errors it has two additional distinct tRNA(Ile)-dependent editing activities. One activity is designated as 'pretransfer' editing and involves the hydrolysis of activated Val-AMP. The other activity is designated 'posttransfer' editing and involves deacylation of mischarged Val-tRNA(Ile) (By similarity)
COG0061	50589	23416	16737	14967	91330	83058	34044	35176	71459	55918	82302	558996	28013.8	Catalyzes the phosphorylation of NAD to NADP. Utilizes ATP and other nucleoside triphosphates as well as inorganic polyphosphate as a source of phosphorus (By similarity)
COG0062	18991	7812	995	2814	38516	32114	4012	3340	30808	21314	32848	193564	14314.2	NADHX epimerase activity
COG0063	23243	11940	13224	13596	43346	40624	25477	24574	34514	25944	37556	294038	11133.6	Together with NAD(P)HX epimerase, which catalyzes the epimerization of the S- and R-forms, the enzyme allows the repair of both epimers of NAD(P)HX, a damaged form of NAD(P)H that is a result of enzymatic or heat-dependent hydration (By similarity)
COG0064	32209	13512	15894	13283	53511	51858	33522	34395	41694	35291	50081	375250	14830	Allows the formation of correctly charged Asn-tRNA(Asn) or Gln-tRNA(Gln) through the transamidation of misacylated Asp- tRNA(Asn) or Glu-tRNA(Gln) in organisms which lack either or both of asparaginyl-tRNA or glutaminyl-tRNA synthetases. The reaction takes place in the presence of glutamine and ATP through an activated phospho-Asp-tRNA(Asn) or phospho-Glu-tRNA(Gln) (By similarity)
COG0065	33325	15639	18043	15832	54814	53460	39960	38830	42942	36753	51575	401173	14568.3	Catalyzes the isomerization between 2-isopropylmalate and 3-isopropylmalate, via the formation of 2-isopropylmaleate (By similarity)
COG0066	33299	15620	18010	15806	54774	53427	39897	38775	42875	36705	51506	400694	14557.9	Catalyzes the isomerization between 2-isopropylmalate and 3-isopropylmalate, via the formation of 2-isopropylmaleate (By similarity)
COG0067	10024	3459	3854	1271	11160	12050	10925	12067	8192	10664	13845	97511	4144.21	glutamate synthase
COG0068	701	1367	5652	4013	911	3219	17005	16068	1067	946	1037	51986	6052.89	protein carbamoylation
COG0069	45371	22639	28203	25637	68063	68913	54167	57262	52274	49253	66372	538154	16893.2	glutamate synthase
COG0070	8039	2901	3369	899	9224	11415	9332	10666	6118	8407	10592	80962	3547.35	glutamate synthase
COG0071	24998	13220	33562	25846	26872	40171	86698	82591	22648	27328	30733	414667	24166.7	response to heat
COG0072	33119	16826	16512	14922	54329	52355	34021	34985	42560	36246	51149	387024	14400.2	phenylalanyl-tRNA synthetase (beta subunit)
COG0073	12819	5999	6240	4803	13706	14528	16974	16925	11062	13465	16910	133431	4548.66	Is required not only for elongation of protein synthesis but also for the initiation of all mRNA translation through initiator tRNA(fMet) aminoacylation (By similarity)
COG0074	16089	10692	16394	15353	17797	22007	33949	35260	14188	17336	20515	219580	7835.7	Succinyl-CoA ligase ADP-forming subunit alpha
COG0075	46702	18746	7418	7366	87214	71613	19343	18041	69945	51654	77626	475668	30155	aminotransferase
COG0076	27482	15713	13392	13624	48532	47642	20178	22780	36749	30137	41692	317921	13140.5	decarboxylase
COG0077	33415	16702	15155	14201	54785	51641	30427	30863	42945	36654	51646	378434	14863.3	Prephenate dehydratase
COG0078	34105	16111	16993	16449	55411	52747	34548	36963	43996	37475	52455	397253	14627.7	ornithine carbamoyltransferase
COG0079	55917	24753	24576	25125	97510	92802	60172	59312	76795	61961	88152	667075	26995.4	Imidazole acetol-phosphate transaminase
COG0080	33111	16826	16512	14922	54329	52355	34025	34975	42560	36248	51150	387013	14400.4	This protein binds directly to 23S ribosomal RNA (By similarity)
COG0081	33111	16826	16515	14922	54329	52355	34029	34986	42560	36248	51150	387031	14400	Binds directly to 23S rRNA. The L1 stalk is quite mobile in the ribosome, and is involved in E site tRNA release (By similarity)
COG0082	33107	16820	16503	14904	54316	52349	33996	34972	42557	36232	51143	386899	14401.7	5-enolpyruvylshikimate-3-phosphate phospholyase
COG0083	21026	9542	4896	4425	40908	36546	11387	12153	31731	23143	34776	230533	13354.9	Catalyzes the ATP-dependent phosphorylation of L- homoserine to L-homoserine phosphate (By similarity)
COG0084	35324	22434	25414	28981	56672	54902	45195	47672	45028	38924	54034	454580	12060.4	tatd family
COG0085	33116	16824	16529	13998	54315	52313	33934	34719	42552	36226	51130	385656	14522	DNA-dependent RNA polymerase catalyzes the transcription of DNA into RNA using the four ribonucleoside triphosphates as substrates (By similarity)
COG0086	50489	23287	16826	15018	91227	82937	34363	35479	71431	55711	82176	558944	27924.7	DNA-dependent RNA polymerase catalyzes the transcription of DNA into RNA using the four ribonucleoside triphosphates as substrates (By similarity)
COG0087	33119	16826	16512	14922	54329	52355	34021	34985	42560	36246	51149	387024	14400.2	One of the primary rRNA binding proteins, it binds directly near the 3'-end of the 23S rRNA, where it nucleates assembly of the 50S subunit (By similarity)
COG0088	33122	16826	16512	14922	54330	52355	34025	34985	42560	36248	51150	387035	14400.4	One of the primary rRNA binding proteins, this protein initially binds near the 5'-end of the 23S rRNA. It is important during the early stages of 50S assembly. It makes multiple contacts with different domains of the 23S rRNA in the assembled 50S subunit and ribosome (By similarity)
COG0089	33122	16826	16512	14922	54330	52355	34025	34985	42560	36248	51150	387035	14400.4	One of the early assembly proteins it binds 23S rRNA. One of the proteins that surrounds the polypeptide exit tunnel on the outside of the ribosome. Forms the main docking site for trigger factor binding to the ribosome (By similarity)
COG0090	33119	16826	16512	14922	54329	52355	34021	34985	42560	36246	51149	387024	14400.2	One of the primary rRNA binding proteins. Required for association of the 30S and 50S subunits to form the 70S ribosome, for tRNA binding and peptide bond formation. It has been suggested to have peptidyltransferase activity
COG0091	33119	16826	16512	14922	54329	52355	34021	34985	42560	36246	51149	387024	14400.2	The globular domain of the protein is located near the polypeptide exit tunnel on the outside of the subunit, while an extended beta-hairpin is found that lines the wall of the exit tunnel in the center of the 70S ribosome (By similarity)
COG0092	33119	16826	16512	14922	54329	52355	34021	34985	42560	36246	51149	387024	14400.2	Binds the lower part of the 30S subunit head. Binds mRNA in the 70S ribosome, positioning it for translation (By similarity)
COG0093	33101	16819	16503	14910	54301	52307	33978	34962	42519	36215	51120	386735	14389.6	Binds to 23S rRNA. Forms part of two intersubunit bridges in the 70S ribosome (By similarity)
COG0094	33119	16826	16512	14922	54329	52355	34021	34985	42560	36246	51149	387024	14400.2	This is 1 of the proteins that binds and probably mediates the attachment of the 5S RNA into the large ribosomal subunit, where it forms part of the central protuberance. In the 70S ribosome it contacts protein S13 of the 30S subunit (bridge B1b), connecting the 2 subunits
COG0095	20570	9493	7874	4901	40751	39291	19667	19413	31948	22980	34396	251284	12485.4	Lipoate-protein, ligase
COG0096	33122	16826	16512	14922	54330	52355	34025	34975	42560	36248	51150	387025	14400.4	One of the primary rRNA binding proteins, it binds directly to 16S rRNA central domain where it helps coordinate assembly of the platform of the 30S subunit (By similarity)
COG0097	33122	16826	16512	14922	54330	52355	34025	34985	42560	36248	51150	387035	14400.4	This protein binds to the 23S rRNA, and is important in its secondary structure. It is located near the subunit interface in the base of the L7 L12 stalk, and near the tRNA binding site of the peptidyltransferase center (By similarity)
COG0098	33119	16825	16512	14922	54329	52355	34021	34985	42560	36246	51149	387023	14400.3	Located at the back of the 30S subunit body where it stabilizes the conformation of the head with respect to the body (By similarity)
COG0099	33119	17019	16515	14916	54329	52355	34021	34982	42559	36246	51149	387210	14376.1	Located at the top of the head of the 30S subunit, it contacts several helices of the 16S rRNA. In the 70S ribosome it contacts the 23S rRNA (bridge B1a) and protein L5 of the 50S subunit (bridge B1b), connecting the 2 subunits
COG0100	33126	16831	16512	14942	54337	52359	34027	35000	42561	36246	51150	387091	14398.3	Located on the platform of the 30S subunit, it bridges several disparate RNA helices of the 16S rRNA. Forms part of the Shine-Dalgarno cleft in the 70S ribosome (By similarity)
COG0101	34025	17038	16740	15124	55170	53006	34731	35611	43492	37227	52247	394411	14663	Formation of pseudouridine at positions 38, 39 and 40 in the anticodon stem and loop of transfer RNAs (By similarity)
COG0102	33119	16826	16576	14922	54329	52355	34372	34985	42560	36246	51149	387439	14389.4	This protein is one of the early assembly proteins of the 50S ribosomal subunit, although it is not seen to bind rRNA by itself. It is important during the early stages of 50S assembly (By similarity)
COG0103	33119	16826	16576	14922	54329	52355	34372	34985	42560	36246	51149	387439	14389.4	30S ribosomal protein S9
COG0104	33144	17463	16541	15583	54359	52410	34118	35251	42641	36276	51185	388971	14240.8	Plays an important role in the de novo pathway of purine nucleotide biosynthesis
COG0105	33417	16837	16798	15113	54563	52511	35106	35542	42879	36570	51369	390705	14416.6	Major role in the synthesis of nucleoside triphosphates other than ATP. The ATP gamma phosphate is transferred to the NDP beta phosphate via a ping-pong mechanism, using a phosphorylated active-site intermediate (By similarity)
COG0106	33223	15433	16486	14867	54406	52349	33982	34949	42611	36320	51228	385854	14614	phosphoribosylformimino-5-aminoimidazole carboxamide ribotide isomerase
COG0107	52850	23371	19687	15633	94484	89449	41545	44505	71835	58726	85025	597110	28340.5	IGPS catalyzes the conversion of PRFAR and glutamine to IGP, AICAR and glutamate. The HisF subunit catalyzes the cyclization activity that produces IGP and AICAR from PRFAR using the ammonia provided by the HisH subunit (By similarity)
COG0108	33194	19739	21661	21124	54321	52081	36370	36686	42598	36232	51162	405168	12489.6	Catalyzes the conversion of D-ribulose 5-phosphate to formate and 3,4-dihydroxy-2-butanone 4-phosphate (By similarity)
COG0109	32814	15188	15210	16918	54094	52254	31547	33218	42139	35934	50887	380203	14475.6	Converts heme B (protoheme IX) to heme O by substitution of the vinyl group on carbon 2 of heme B porphyrin ring with a hydroxyethyl farnesyl side group (By similarity)
COG0110	11591	13301	18981	21012	12631	17485	26190	25474	10866	12791	12842	183164	5566.34	acetyltransferase
COG0111	60628	35068	41523	39605	85522	89409	75110	80035	65855	65863	86511	725129	19776.8	Dehydrogenase
COG0112	33587	17961	17053	16531	54815	52643	34351	35536	42966	36887	51702	394032	14137.5	Catalyzes the reversible interconversion of serine and glycine with tetrahydrofolate (THF) serving as the one-carbon carrier. This reaction serves as the major source of one-carbon groups required for the biosynthesis of purines, thymidylate, methionine, and other important biomolecules. Also exhibits THF- independent aldolase activity toward beta-hydroxyamino acids, producing glycine and aldehyd…
COG0113	33450	17565	16514	15000	54592	53251	34029	34988	43030	36717	51687	390823	14521.7	delta-aminolevulinic acid dehydratase
COG0114	32348	16103	14570	13804	53459	51264	27806	29722	41501	35312	50182	366071	14683.1	fumarate hydratase class II
COG0115	72222	36772	34189	32216	115106	107744	72436	74309	91598	78583	110287	825462	30308.9	brancheD-chain amino acid aminotransferase
COG0116	19680	12120	9060	10395	39412	33230	12038	13086	31500	22164	33882	236567	11144	Specifically methylates the guanine in position 2445 (m2G2445) and the guanine in position 2069 (m7G2069) of 23S rRNA (By similarity)
COG0117	32931	16489	15052	13102	53887	51451	29179	31191	42147	35799	50798	372026	14785.5	Converts 2,5-diamino-6-(ribosylamino)-4(3h)-pyrimidinone 5'-phosphate into 5-amino-6-(ribosylamino)-2,4(1h,3h)- pyrimidinedione 5'-phosphate (By similarity)
COG0118	48820	21221	16670	14878	89979	79997	34029	35049	70228	54051	79926	544848	27330.5	IGPS catalyzes the conversion of PRFAR and glutamine to IGP, AICAR and glutamate. The hisH subunit provides the glutamine amidotransferase activity that produces the ammonia necessary to hisF for the synthesis of IGP and AICAR (By similarity)
COG0119	56619	28334	43981	42943	81094	87804	90804	90904	63631	61957	80149	728220	21641.6	Catalyzes the condensation of the acetyl group of acetyl-CoA with 3-methyl-2-oxobutanoate (2-oxoisovalerate) to form 3-carboxy-3-hydroxy-4-methylpentanoate (2-isopropylmalate) (By similarity)
COG0120	19075	10258	7865	9700	38604	32966	9319	9354	30655	21374	32946	222116	11719.1	phosphoriboisomerase A
COG0121	4150	5502	10411	10990	4655	7958	13843	15261	3631	4601	4850	85852	4171.49	Glutamine amidotransferase
COG0122	14243	7054	7609	8104	16148	19235	21897	22783	12384	15266	18456	163179	5584.33	Glycosylase
COG0123	25690	11556	18315	18877	28101	37390	52790	54854	21781	27451	33775	330580	13793.5	Histone deacetylase
COG0124	50172	23198	18155	15707	91150	82750	38505	38381	71084	55379	81733	566214	27199.4	Histidyl-trna synthetase
COG0125	34424	15590	16513	15188	56257	55014	34271	35340	42870	37554	52234	395255	15232.7	Phosphorylation of dTMP to form dTDP in both de novo and salvage pathways of dTTP synthesis (By similarity)
COG0126	33122	16820	16505	14922	54335	52367	34084	35031	42566	36252	51153	387157	14404.3	phosphoglycerate kinase
COG0127	50127	23117	16723	14961	90935	82019	34079	35113	70926	55200	81603	554803	27740.6	Pyrophosphatase that hydrolyzes non-canonical purine nucleotides such as XTP and ITP dITP to their respective monophosphate derivatives. Might exclude non-canonical purines from DNA precursor pool, thus preventing their incorporation into DNA and avoiding chromosomal lesions (By similarity)
COG0128	33104	16818	16583	14034	54291	52301	34051	34979	42546	36194	51143	386044	14505.8	5-enolpyruvylshikimate-3-phosphate synthase
COG0129	45738	25545	27781	30719	68392	71289	58149	55640	51751	50368	66784	552156	16296.7	Dihydroxy-acid dehydratase
COG0130	28766	14472	13272	13974	49562	42763	25812	25010	40633	31212	45811	331287	13159.3	Responsible for synthesis of pseudouridine from uracil- 55 in the psi GC loop of transfer RNAs (By similarity)
COG0131	33088	15413	16486	14856	54303	52322	33960	34930	42529	36185	51114	385186	14585.4	imidazoleglycerolphosphate dehydratase
COG0132	22440	12588	9499	11168	42363	37663	14679	15042	33473	24807	36458	260180	12012	Catalyzes a mechanistically unusual reaction, the ATP- dependent insertion of CO2 between the N7 and N8 nitrogen atoms of 7,8-diaminopelargonic acid (DAPA) to form an ureido ring (By similarity)
COG0133	33857	18591	21005	21067	55155	52580	34097	35250	43381	37050	52099	404132	13077.7	The beta subunit is responsible for the synthesis of L- tryptophan from indole and L-serine (By similarity)
COG0134	33170	16821	16504	14861	54362	52359	34063	34975	42575	36286	51172	387148	14417.9	indole-3-glycerol phosphate synthase
COG0135	30682	15214	14919	13808	51379	47665	31670	32340	40679	33705	48741	360802	13707	N-(5'-phosphoribosyl)anthranilate isomerase
COG0136	33243	17912	17085	16906	54446	52487	34485	35631	42706	36364	51263	392528	13959.3	Catalyzes the NADPH-dependent formation of L-aspartate- semialdehyde (L-ASA) by the reductive dephosphorylation of L- aspartyl-4-phosphate (By similarity)
COG0137	33066	15222	16489	14858	54305	52326	34029	34934	42510	36180	51113	385032	14610	Citrulline--aspartate ligase
COG0138	33196	16832	16944	15291	54415	52368	35440	36421	42656	36306	51178	391047	14308.5	bifunctional purine biosynthesis protein PURH
COG0139	33193	15433	16520	15818	54388	52530	34409	35602	42602	36294	51194	387983	14492.8	Phosphoribosyl-amp cyclohydrolase
COG0140	25961	13923	9955	11413	46653	47083	16158	17371	34522	29099	41129	293267	14017	phosphoribosyl-ATP pyrophosphatase
COG0141	39517	18367	19788	15840	61360	63739	42874	45511	46309	43471	59017	455793	17057.8	Catalyzes the sequential NAD-dependent oxidations of L- histidinol to L-histidinaldehyde and then to L-histidine (By similarity)
COG0142	67538	34369	34254	30651	110125	107947	71716	72985	86868	74395	104238	795086	29295.9	synthase
COG0143	33140	16845	16546	14929	54363	52396	34146	35067	42635	36297	51222	387586	14412.7	Is required not only for elongation of protein synthesis but also for the initiation of all mRNA translation through initiator tRNA(fMet) aminoacylation (By similarity)
COG0144	30547	18618	16179	16966	51174	46298	34028	34327	42753	33329	48051	372270	12557	nOP2 Sun
COG0145	9862	4315	10231	7782	10636	15631	35787	29488	9568	10765	12457	156522	9613.69	5-oxoprolinase
COG0146	9281	3729	8227	7280	10113	13939	29872	23621	8770	10238	11743	136813	7652.39	5-oxoprolinase
COG0147	60376	32292	29451	27810	101890	100539	57374	60362	78270	66533	93451	708348	27249.7	synthase (Component I)
COG0148	33453	16980	16577	14994	54682	52431	34233	35205	42925	36625	51672	389777	14491.2	Catalyzes the reversible conversion of 2- phosphoglycerate into phosphoenolpyruvate. It is essential for the degradation of carbohydrates via glycolysis (By similarity)
COG0149	33134	17030	16519	15059	54366	52361	34031	35025	42589	36291	51180	387585	14364.6	triosephosphate isomerase
COG0150	33132	16828	16512	14920	54344	52341	33969	34980	42567	36263	51171	387027	14403.7	phosphoribosylaminoimidazole synthetase
COG0151	33312	16930	16595	14979	54491	52515	34245	35346	42651	36530	51352	388946	14433.2	Phosphoribosylglycinamide synthetase
COG0152	33151	16837	16573	14955	54378	52395	34285	35188	42602	36312	51207	387883	14403.9	SAICAR synthetase
COG0153	5435	3998	2865	4114	6522	5096	6774	8978	5429	5109	6806	61126	1669.72	Catalyzes the transfer of the gamma-phosphate of ATP to D-galactose to form alpha-D-galactose-1-phosphate (Gal-1-P) (By similarity)
COG0154	57942	28388	47316	47364	83330	93723	93930	88868	62261	63624	79827	746573	21726.1	Allows the formation of correctly charged Gln-tRNA(Gln) through the transamidation of misacylated Glu-tRNA(Gln) in organisms which lack glutaminyl-tRNA synthetase. The reaction takes place in the presence of glutamine and ATP through an activated gamma-phospho-Glu-tRNA(Gln) (By similarity)
COG0155	24653	12809	8496	14096	44413	41372	11190	11723	35952	27298	39196	271198	13701.7	Component of the sulfite reductase complex that catalyzes the 6-electron reduction of sulfite to sulfide. This is one of several activities required for the biosynthesis of L- cysteine from sulfate (By similarity)
COG0156	34496	21904	16828	19292	55132	47672	36920	34588	46817	37573	52438	403660	13180.1	8-Amino-7-oxononanoate synthase
COG0157	27388	14340	16241	14781	47989	50218	32982	34264	36252	30780	42792	348027	12673.7	nicotinate-nucleotide diphosphorylase (carboxylating) activity
COG0158	3496	5535	7495	9873	3203	3604	8535	9250	3645	3936	4245	62817	2573.7	D-fructose-1,6-bisphosphate 1-phosphohydrolase class 1
COG0159	33784	17048	16513	15926	55083	52569	34029	35038	43294	37006	52082	392372	14498.1	The alpha subunit is responsible for the aldol cleavage of indoleglycerol phosphate to indole and glyceraldehyde 3- phosphate (By similarity)
COG0160	12192	9305	18856	22335	14736	18271	28308	26153	11477	12688	13954	188275	6251.83	transaminase activity
COG0161	42879	20542	18373	22286	64934	60332	41418	41357	52134	46328	63596	474179	16867.8	Catalyzes the transfer of the alpha-amino group from S- adenosyl-L-methionine (SAM) to 7-keto-8-aminopelargonic acid (KAPA) to form 7,8-diaminopelargonic acid (DAPA). It is the only animotransferase known to utilize SAM as an amino donor (By similarity)
COG0162	33128	17878	17013	15618	54342	52362	34067	35092	42581	36256	51155	389492	14108.5	Catalyzes the attachment of tyrosine to tRNA(Tyr) in a two-step reaction tyrosine is first activated by ATP to form Tyr- AMP and then transferred to the acceptor end of tRNA(Tyr) (By similarity)
COG0163	19347	8904	4315	5298	38948	33777	12903	12139	31146	21798	33387	221962	12462.1	carboxy-lyase activity
COG0164	33137	16829	16512	14922	54333	52364	34076	34990	42563	36251	51154	387131	14401.5	Endonuclease that specifically degrades the RNA of RNA- DNA hybrids (By similarity)
COG0165	33164	17385	16869	15790	54420	52346	34058	36358	43103	36353	51225	391071	14211.1	argininosuccinate lyase
COG0166	33480	17175	17854	16668	54576	53088	37532	39212	42828	36557	51557	400527	14144.1	glucose-6-phosphate isomerase activity
COG0167	33911	17667	18422	17161	55333	54471	39757	40535	43494	37402	52204	410357	14338.5	Catalyzes the conversion of dihydroorotate to orotate
COG0168	39262	23301	21541	17469	60757	63695	44204	48591	45867	43289	58645	466621	15937.4	Low-affinity potassium transport system. Interacts with Trk system potassium uptake protein TrkA (By similarity)
COG0169	35975	17298	17235	15689	57887	53528	37242	38115	46137	38927	55452	413485	15390.3	shikimate dehydrogenase
COG0170	17996	7099	3810	2037	37653	33073	9969	10596	29746	20374	31925	204278	12812.8	phosphatidate Cytidylyltransferase
COG0171	33498	17129	18042	15730	54645	53160	38204	39701	42925	36648	51682	401364	14311.1	nh(3)-dependent nad( ) synthetase
COG0172	33254	16934	16524	15005	54485	52523	34146	35196	42641	36513	51335	388556	14437.6	Catalyzes the attachment of serine to tRNA(Ser). Is also able to aminoacylate tRNA(Sec) with serine, to form the misacylated tRNA L-seryl-tRNA(Sec), which will be further converted into selenocysteinyl-tRNA(Sec) (By similarity)
COG0173	33122	16821	16503	14908	54328	52352	33999	34976	42557	36246	51149	386961	14403.5	aspartyl-trna synthetase
COG0174	68155	28082	32413	30066	94195	93266	66880	69914	72995	72072	96563	724601	25369.2	glutamine synthetase
COG0175	34771	23009	22992	31811	56201	49706	28949	29323	47188	37878	52649	414477	11925.3	Reduction of activated sulfate into sulfite (By similarity)
COG0176	35131	18158	18722	19022	56204	54622	39371	41629	45356	38679	53627	420521	14334.1	Transaldolase is important for the balance of metabolites in the pentose-phosphate pathway (By similarity)
COG0177	35754	17732	18936	17967	57705	57478	41146	43064	44651	39271	53985	427689	15088.6	endonuclease III
COG0178	37508	21601	27012	25417	59160	60181	50391	52559	46797	40955	55897	477478	13922.3	The UvrABC repair system catalyzes the recognition and processing of DNA lesions. UvrA is an ATPase and a DNA-binding protein. A damage recognition complex composed of 2 UvrA and 2 UvrB subunits scans DNA for abnormalities. When the presence of a lesion has been verified by UvrB, the UvrA molecules dissociate (By similarity)
COG0179	27849	19018	27834	30593	31694	42050	65818	54709	24074	29744	33088	386471	13880.3	Fumarylacetoacetate hydrolase
COG0180	33183	17037	16714	15479	54418	52399	34259	35779	42866	36324	51210	389668	14306.5	tryptophanyltRNA synthetase
COG0181	33156	16827	16504	14843	54342	52352	33998	34962	42568	36270	51152	386974	14414.2	Tetrapolymerization of the monopyrrole PBG into the hydroxymethylbilane pre-uroporphyrinogen in several discrete steps (By similarity)
COG0182	7241	4238	9483	5069	7537	16539	26239	27693	4931	8444	9302	126716	8331.67	Catalyzes the interconversion of methylthioribose-1- phosphate (MTR-1-P) into methylthioribulose-1-phosphate (MTRu-1-P) (By similarity)
COG0183	52172	40554	75521	94043	61290	84674	124995	126759	47334	55693	60408	823443	29801.8	acetyl-coa acetyltransferase
COG0184	33108	16827	16512	14922	54330	52355	34021	34987	42562	36247	51150	387021	14400.6	Forms an intersubunit bridge (bridge B4) with the 23S rRNA of the 50S subunit in the ribosome (By similarity)
COG0185	33119	16826	16512	14922	54329	52355	34021	34975	42560	36246	51149	387014	14400.2	Protein S19 forms a complex with S13 that binds strongly to the 16S ribosomal RNA (By similarity)
COG0186	33122	16826	16512	14922	54330	52355	34025	34975	42560	36248	51150	387025	14400.4	One of the primary rRNA binding proteins, it binds specifically to the 5'-end of 16S ribosomal
COG0187	41095	24146	25691	26745	62620	61227	47801	48813	49956	44984	60843	493921	14240.2	DNA gyrase negatively supercoils closed circular double- stranded DNA in an ATP-dependent manner and also catalyzes the interconversion of other topological isomers of double-stranded DNA rings, including catenanes and knotted rings (By similarity)
COG0188	56892	30259	26520	27860	98133	92170	50036	50731	77328	62697	89237	661863	26238	DNA gyrase negatively supercoils closed circular double- stranded DNA in an ATP-dependent manner and also catalyzes the interconversion of other topological isomers of double-stranded DNA rings, including catenanes and knotted rings (By similarity)
COG0189	40007	27627	29941	34211	61226	61030	56895	60648	50328	44497	59933	526343	13186.5	Responsible for the addition of glutamate residues to the C-terminus of ribosomal protein S6 (By similarity)
COG0190	33290	17131	16698	15737	54609	52671	35514	36013	42936	36588	51391	392578	14336.2	Catalyzes the oxidation of 5,10- methylenetetrahydrofolate to 5,10-methenyltetrahydrofolate and then the hydrolysis of 5,10-methenyltetrahydrofolate to 10- formyltetrahydrofolate (By similarity)
COG0191	29317	14601	12141	12874	49972	42858	20890	21460	41376	31972	46655	324116	14062.4	Aldolase
COG0192	33184	16829	16565	14937	54386	52382	34201	35216	42614	36318	51212	387844	14409.4	Catalyzes the formation of S-adenosylmethionine from methionine and ATP
COG0193	33119	17014	16507	14910	54329	52351	33996	34982	42559	36246	51148	387161	14378.2	The natural substrate for this enzyme may be peptidyl- tRNAs which drop off the ribosome during protein synthesis (By similarity)
COG0194	33120	16823	16503	14974	54327	52351	33996	34976	42558	36245	51149	387022	14393.8	Essential for recycling GMP and indirectly, cGMP (By similarity)
COG0195	33119	16826	16512	14922	54329	52355	34021	34985	42560	36246	51149	387024	14400.2	Transcription elongation factor NusA
COG0196	33119	16820	16503	14924	54320	52349	33996	34977	42557	36244	51148	386957	14399.9	riboflavin biosynthesis protein ribF
COG0197	33122	16826	16512	14922	54330	52355	34025	34985	42560	36248	51150	387035	14400.4	Binds 23S rRNA and is also seen to make contacts with the A and possibly P site tRNAs (By similarity)
COG0198	33120	16826	16512	14922	54330	52343	33966	34972	42561	36247	51149	386948	14399.4	One of the proteins that surrounds the polypeptide exit tunnel on the outside of the subunit (By similarity)
COG0199	33125	17025	16528	15018	54333	52361	34039	35156	42573	36252	51156	387566	14361.6	Binds 16S rRNA, required for the assembly of 30S particles and may also be responsible for determining the conformation of the 16S rRNA at the A site (By similarity)
COG0200	33118	16826	16512	14922	54329	52355	34021	34978	42560	36246	51149	387016	14400.2	Binds to the 23S rRNA (By similarity)
COG0201	33120	16830	16518	14931	54331	52359	34024	34994	42561	36246	51151	387065	14398.6	The central subunit of the protein translocation channel SecYEG. Consists of two halves formed by TMs 1-5 and 6-10. These two domains form a lateral gate at the front which open onto the bilayer between TMs 2 and 7, and are clamped together by SecE at the back. The channel is closed by both a pore ring composed of hydrophobic SecY resides and a short helix (helix 2A) on the extracellular side of …
COG0202	33431	16838	17099	15289	54561	52498	35969	37194	42868	36559	51361	393667	14356.3	DNA-dependent RNA polymerase catalyzes the transcription of DNA into RNA using the four ribonucleoside triphosphates as substrates (By similarity)
COG0203	33118	16817	16503	14907	54326	52351	33995	34970	42555	36243	51148	386933	14403.6	50S ribosomal protein l17
COG0204	73570	47798	55891	60554	116478	119440	89601	97450	94599	81707	109519	946607	24504.4	Acyltransferase
COG0205	9093	5519	10536	8351	10184	11988	30310	28458	9918	9441	11402	145200	8189.83	phosphohexokinase
COG0206	32890	17502	17759	16502	54323	53036	38080	38108	42438	36133	51073	397844	14027.9	Essential cell division protein that forms a contractile ring structure (Z ring) at the future cell division site. The regulation of the ring assembly controls the timing and the location of cell division. One of the functions of the FtsZ ring is to recruit other cell division proteins to the septum to produce a new cell wall between the dividing cells. Binds GTP and shows GTPase activity (By sim…
COG0207	8546	8687	8842	11395	9121	6102	13538	14289	9671	8713	11836	110740	2430.86	Provides the sole de novo source of dTMP for DNA biosynthesis (By similarity)
COG0208	14318	9037	10051	10898	15989	17961	16488	17808	11799	14968	18256	157573	3361.85	Provides the precursors necessary for DNA synthesis. Catalyzes the biosynthesis of deoxyribonucleotides from the corresponding ribonucleotides (By similarity)
COG0209	17799	11631	20162	18277	19511	25610	45151	45550	16107	19272	22804	261874	11221	Provides the precursors necessary for DNA synthesis. Catalyzes the biosynthesis of deoxyribonucleotides from the corresponding ribonucleotides (By similarity)
COG0210	44272	27737	41057	41122	66776	73326	75169	77693	54079	48999	64144	614374	16595.6	helicase
COG0211	33118	16821	16503	14908	54327	52351	33996	34969	42557	36244	51148	386942	14403.2	50S ribosomal protein l27
COG0212	32706	16587	13389	13169	53808	50864	24836	26335	41890	35746	50619	359949	15187.7	5-formyltetrahydrofolate cyclo-ligase
COG0213	4097	3285	3926	3529	4735	7113	9707	9865	3578	4399	4425	58659	2427.55	The enzymes which catalyze the reversible phosphorolysis of pyrimidine nucleosides are involved in the degradation of these compounds and in their utilization as carbon and energy sources, or in the rescue of pyrimidine bases for nucleotide synthesis (By similarity)
COG0214	2355	974	2967	2179	3029	5206	8251	8036	1796	2531	2354	39678	2470.43	Involved in the production of pyridoxal phosphate, probably by incorporating ammonia into the pyridine ring (By similarity)
COG0215	35562	18097	20927	18247	57600	58682	45439	46852	44871	39109	53808	439194	15122.3	Cysteinyl-tRNA synthetase
COG0216	33123	16822	16508	14908	54329	52358	34048	34978	42557	36245	51148	387024	14403	Peptide chain release factor 1 directs the termination of translation in response to the peptide chain termination codons UAG and UAA (By similarity)
COG0217	17575	11672	16389	15977	18804	24760	34415	35299	15024	18569	22461	230945	7696.59	transcriptional regulatory protein
COG0218	9088	7441	10563	12110	9636	6963	18882	19293	9994	9230	12463	125663	4136.56	Necessary for normal cell division and for the maintenance of normal septation (By similarity)
COG0219	29910	15783	12796	13843	50616	46041	22766	25186	39899	32875	47918	337633	13924.8	Methylates the ribose at the nucleotide 34 wobble position in the two leucyl isoacceptors tRNA(Leu)(CmAA) and tRNA(Leu)(cmnm5UmAA). Catalyzes the methyl transfer from S- adenosyl-L-methionine to the 2'-OH of the wobble nucleotide (By similarity)
COG0220	26786	15724	14719	19982	46903	38508	17495	17714	39616	29268	43717	310432	12082.1	Catalyzes the formation of N(7)-methylguanine at position 46 (m7G46) in tRNA (By similarity)
COG0221	42884	19900	12989	12907	82788	71937	24002	23693	65559	47658	72082	476399	26209.4	Pyrophosphate phospho-hydrolase
COG0222	33140	16828	16522	14927	54393	52357	34034	35048	42615	36281	51177	387322	14412.4	Seems to be the binding site for several of the factors involved in protein synthesis and appears to be essential for accurate translation (By similarity)
COG0223	41103	19732	23955	20230	63178	64553	55085	57806	48787	44575	61539	500543	17244.8	Modifies the free amino group of the aminoacyl moiety of methionyl-tRNA(fMet). The formyl group appears to play a dual role in the initiator identity of N-formylmethionyl-tRNA by (I) promoting its recognition by IF2 and (II) impairing its binding to EFTu-GTP (By similarity)
COG0224	33572	16957	16657	15113	54733	52641	34527	35308	42967	36845	51531	390851	14482.8	Produces ATP from ADP in the presence of a proton gradient across the membrane. The gamma chain is believed to be important in regulating ATPase activity and the flow of protons through the CF(0) complex (By similarity)
COG0225	55014	26365	18688	20438	96044	85245	41207	41270	76415	59750	88069	608505	28079.9	Has an important function as a repair enzyme for proteins that have been inactivated by oxidation. Catalyzes the reversible oxidation-reduction of methionine sulfoxide in proteins to methionine (By similarity)
COG0226	52730	25961	22247	21569	93640	90136	47580	50042	75902	59184	85903	624894	26869	phosphate abc transporter
COG0227	32792	16802	16255	14710	54033	52200	33135	34477	42199	35902	50912	383417	14375.5	50s ribosomal protein L28
COG0228	33111	16821	16503	14908	54327	52352	33999	34976	42557	36246	51149	386949	14403.5	30s ribosomal protein S16
COG0229	35814	17285	16660	17358	56417	55866	33293	35006	44498	38849	54546	405592	15190.8	)-reductase
COG0230	395	1174	1896	762	341	1055	3819	4481	468	443	537	15371	1443.19	50s ribosomal protein l34
COG0231	33970	17937	17156	16642	55174	52797	34876	36634	43463	37213	52189	398051	14249.7	Involved in peptide bond synthesis. Stimulates efficient translation and peptide-bond synthesis on native or reconstituted 70S ribosomes in vitro. Probably functions indirectly by altering the affinity of the ribosome for aminoacyl-tRNA, thus increasing their reactivity as acceptors for peptidyl transferase (By similarity)
COG0232	15205	12354	20456	20244	16986	21128	31833	32694	13048	16207	19629	219784	6753.41	deoxyguanosinetriphosphate triphosphohydrolase-like protein
COG0233	33122	16821	16503	14908	54328	52352	33999	34976	42557	36246	51149	386961	14403.5	Responsible for the release of ribosomes from messenger RNA at the termination of protein biosynthesis. May increase the efficiency of translation by recycling ribosomes from one round of translation to another (By similarity)
COG0234	36139	20112	19925	17002	57947	58339	41925	42315	45034	39509	54238	432485	14943.2	Binds to cpn60 in the presence of Mg-ATP and suppresses the ATPase activity of the latter (By similarity)
COG0235	20811	11096	19355	20946	23085	29707	44885	44627	17636	22159	25887	280194	10612.5	Class II aldolase adducin
COG0236	39829	23880	28673	25421	61201	64735	59040	57257	48146	43257	58752	510191	15175.9	Carrier of the growing fatty acid chain in fatty acid biosynthesis (By similarity)
COG0237	33103	16832	16519	14925	54328	52355	34015	34993	42561	36246	51149	387026	14398.3	Catalyzes the phosphorylation of the 3'-hydroxyl group of dephosphocoenzyme A to form coenzyme A (By similarity)
COG0238	33109	16821	16506	14923	54327	52351	34005	35125	42567	36248	51151	387133	14401.5	Binds as a heterodimer with protein S6 to the central domain of the 16S rRNA, where it helps stabilize the platform of the 30S subunit (By similarity)
COG0239	32434	16090	14248	16117	53512	49220	28463	27752	42926	34813	49768	365343	14273.7	inorganic anion transmembrane transporter activity
COG0240	18838	12351	19595	19430	20993	22943	30543	32425	17540	19701	24808	239167	5756.64	glycerol-3-phosphate dehydrogenase
COG0241	3028	4387	7358	8172	3005	5193	19583	19528	3488	3695	3886	81323	6243.95	histidinol-phosphatase activity
COG0242	36654	21905	23448	21822	58166	59059	39628	41055	45436	39984	54745	441902	13726.5	Removes the formyl group from the N-terminal Met of newly synthesized proteins. Requires at least a dipeptide for an efficient rate of reaction. N-terminal L-methionine is a prerequisite for activity but the enzyme has broad specificity at other positions (By similarity)
COG0243	17205	19731	35078	33086	18528	29150	74137	74538	17436	19612	21579	360080	21501	molybdopterin oxidoreductase
COG0244	33074	16823	16511	13992	54297	52294	33850	34662	42538	36198	51125	385364	14520.5	50s ribosomal protein L10
COG0245	32011	14790	14267	13690	52995	49922	27783	28617	41022	34681	49469	359247	14581.1	Involved in the biosynthesis of isopentenyl diphosphate (IPP) and dimethylallyl diphosphate (DMAPP), two major building blocks of isoprenoid compounds. Catalyzes the conversion of 4- diphosphocytidyl-2-C-methyl-D-erythritol 2-phosphate (CDP-ME2P) to 2-C-methyl-D-erythritol 2,4-cyclodiphosphate (ME-CPP) with a corresponding release of cytidine 5-monophosphate (CMP) (By similarity)
COG0246	10211	3578	1844	5137	11412	8122	5996	4040	9765	10436	13218	83759	3695.02	Mannitol dehydrogenase
COG0247	21528	17086	28045	22149	23974	43308	79622	79431	18180	23995	25317	382635	23171.2	domain protein
COG0248	26133	16116	13552	16290	46877	45181	26003	25229	36628	29109	40584	321702	11707.9	ppx gppa phosphatase
COG0249	25291	15522	14224	13974	45042	39793	29643	27099	37455	28316	41267	317626	11133.9	that it carries out the mismatch recognition step. This protein has a weak ATPase activity (By similarity)
COG0250	34705	18880	19156	18330	55747	53886	40498	41261	44013	38034	52892	417402	14001.9	Participates in transcription elongation, termination and antitermination (By similarity)
COG0251	47732	30806	39740	50728	71076	74138	72293	65308	55799	52360	67159	627139	14248.5	Endoribonuclease LPSP
COG0252	6374	8635	14684	17306	6684	10426	15991	17215	5165	6772	7449	116701	4750.55	L-asparaginase
COG0253	33093	16754	15924	14754	54138	51821	31963	32904	42404	36096	51043	380894	14439.7	Catalyzes the stereoinversion of LL-2,6- diaminoheptanedioate (L,L-DAP) to meso-diaminoheptanedioate (meso- DAP), a precursor of L-lysine and an essential component of the bacterial peptidoglycan (By similarity)
COG0254	33111	19202	21452	20087	54341	52359	34031	35265	42605	36263	51166	399882	12791.2	50S ribosomal protein L3-1
COG0255	16815	10907	16168	14775	18046	24341	33499	34297	14210	17712	21550	222320	7647.05	50s ribosomal protein l29
COG0256	33119	16826	16512	14922	54329	52355	34021	34985	42560	36246	51149	387024	14400.2	This is one of the proteins that binds and probably mediates the attachment of the 5S RNA into the large ribosomal subunit, where it forms part of the central protuberance (By similarity)
COG0257	6345	4582	7027	8920	7425	6588	7259	7174	6238	6089	8075	75722	1132.62	50S ribosomal protein L36
COG0258	21662	11185	4057	5848	41636	37085	9777	9240	32811	23923	35308	232532	13837.6	Structure-specific nuclease with 5'-flap endonuclease and 5'-3' exonuclease activities involved in DNA replication and repair. During DNA replication, cleaves the 5'-overhanging flap structure that is generated by displacement synthesis when DNA polymerase encounters the 5'-end of a downstream Okazaki fragment. It enters the flap from the 5'-end and then tracks to cleave the flap base, leaving a …
COG0259	15599	9823	11970	12272	17236	20740	21565	21302	13508	16584	20026	180625	4151.46	Catalyzes the oxidation of either pyridoxine 5'- phosphate (PNP) or pyridoxamine 5'-phosphate (PMP) into pyridoxal 5'-phosphate (PLP) (By similarity)
COG0260	40705	20824	18284	20040	63046	57770	37942	39962	50112	44028	61415	454128	16273.5	Presumably involved in the processing and regular turnover of intracellular proteins. Catalyzes the removal of unsubstituted N-terminal amino acids from various peptides (By similarity)
COG0261	33248	16925	16506	14908	54476	52502	33999	34990	42624	36505	51328	388011	14450.9	This protein binds to 23S rRNA in the presence of protein L20 (By similarity)
COG0262	19908	12299	18214	18771	23070	28114	38264	36664	19248	20985	23821	259358	7911.08	dihydrofolate reductase activity
COG0263	32748	15610	13815	15846	54077	51271	26866	28865	42132	35970	50641	367841	14828.6	Catalyzes the transfer of a phosphate group to glutamate to form glutamate 5-phosphate which rapidly cyclizes to 5- oxoproline (By similarity)
COG0264	33128	16821	16503	14909	54328	52351	33997	34973	42557	36245	51148	386960	14403	Associates with the EF-Tu.GDP complex and induces the exchange of GDP to GTP. It remains bound to the aminoacyl-tRNA.EF- Tu.GTP complex up to the GTP hydrolysis stage on the ribosome (By similarity)
COG0265	92408	42967	46433	39924	154599	153707	110339	102684	124697	102941	141422	1112121	42531.8	Serine protease
COG0266	38791	17232	18341	18412	61755	63805	37028	40145	46021	42036	56501	440067	16782.4	Involved in base excision repair of DNA damaged by oxidation or by mutagenic agents. Acts as DNA glycosylase that recognizes and removes damaged bases. Has a preference for oxidized purines, such as 7,8-dihydro-8-oxoguanine (8-oxoG). Has AP (apurinic apyrimidinic) lyase activity and introduces nicks in the DNA strand. Cleaves the DNA backbone by beta-delta elimination to generate a single-strand …
COG0267	26736	14982	13147	14051	46716	44073	25080	25015	37430	29380	42679	319289	12276.1	50S ribosomal protein L33
COG0268	33014	16798	16369	13894	54191	52245	33502	34166	42396	36098	50999	383672	14519.5	Binds directly to 16S ribosomal RNA (By similarity)
COG0269	511	1164	1172	445	389	566	2020	2087	535	532	402	9823	636.725	synthase
COG0270	13870	6648	9065	8981	15090	21751	25150	26880	11735	15490	17266	171926	6662.59	Cytosine-specific methyltransferase
COG0271	39492	17334	13356	12354	61293	57189	26858	28580	47376	42764	60901	407497	18555.5	Bola-like protein
COG0272	51790	24688	17230	17480	93540	83617	34341	35630	72266	57173	83026	570781	28020.6	DNA ligase (NAD+) activity
COG0274	22000	11785	6011	5614	42311	38451	14005	16304	33423	24787	36393	251084	13213.4	Catalyzes a reversible aldol reaction between acetaldehyde and D-glyceraldehyde 3-phosphate to generate 2-deoxy- D-ribose 5-phosphate (By similarity)
COG0275	33196	17027	16540	14932	54376	52408	34167	35057	42615	36302	51183	387803	14386.8	Specifically methylates the N4 position of cytidine in position 1402 (C1402) of 16S rRNA (By similarity)
COG0276	33073	17532	15802	14269	54272	53025	31707	32948	42572	36309	51361	382870	14645.4	Catalyzes the ferrous insertion into protoporphyrin IX (By similarity)
COG0277	105026	46561	50408	46408	170732	179164	121954	118723	127881	116035	155891	1238783	47667.9	FAD linked oxidase domain protein
COG0278	29184	13995	11649	11566	49900	45467	20409	22376	39062	32081	47015	322704	14456.4	Glutaredoxin
COG0279	13380	7041	11305	8716	14573	16239	30575	31823	12081	14392	17936	178061	8052.49	D-glycero-D-manno-heptose 7-phosphate metabolic process
COG0280	10845	10060	15083	13445	11524	16840	30196	33154	8726	12318	14140	176331	8097.35	phosphate acetyltransferase
COG0281	16133	14491	22190	24130	17865	27200	37046	37984	13008	17941	19361	247349	8503.43	malic enzyme
COG0282	2866	6836	9251	10316	2626	3884	11654	13852	3365	3176	3297	71123	4111.44	acetate kinase activity
COG0283	30526	16605	16496	13979	51255	52031	33752	34669	39408	34108	47273	370102	13598.9	Cytidine monophosphate kinase
COG0284	33117	15429	16503	14917	54318	52353	34016	34981	42559	36233	51144	385570	14582.8	Catalyzes the decarboxylation of orotidine 5'- monophosphate (OMP) to uridine 5'-monophosphate (UMP) (By similarity)
COG0285	33143	17030	17742	15614	54348	52575	37705	37905	42569	36253	51158	396042	14169.9	Folylpolyglutamate synthase
COG0286	9465	13062	24057	20221	9987	19249	52902	51690	10409	10855	11397	233294	16114.6	type I restriction-modification system
COG0287	33008	15163	11978	8581	54221	52048	33763	34795	42327	36107	51019	373010	16079.7	prephenate dehydrogenase
COG0288	12946	9490	12728	14274	12855	18282	26348	24796	11810	13672	16036	173237	5359.33	carbonic anhydrase
COG0289	32805	16508	15021	14137	53921	51105	30036	30548	42178	35827	50670	372756	14584.8	Catalyzes the conversion of 4-hydroxy- tetrahydrodipicolinate (HTPA) to tetrahydrodipicolinate (By similarity)
COG0290	33238	16925	16506	14901	54475	52502	33999	35003	42623	36504	51327	388003	14451.7	IF-3 binds to the 30S ribosomal subunit and shifts the equilibrum between 70S ribosomes and their 50S and 30S subunits in favor of the free subunits, thus enhancing the availability of 30S subunits on which protein synthesis initiation begins (By similarity)
COG0291	33081	16812	16497	14900	54281	52344	33948	34954	42490	36207	51097	386611	14390.9	50s ribosomal protein L35
COG0292	33111	16821	16503	14908	54327	52352	33999	34978	42557	36246	51149	386951	14403.5	Binds directly to 23S ribosomal RNA and is necessary for the in vitro assembly process of the 50S ribosomal subunit. It is not involved in the protein synthesizing functions of that subunit (By similarity)
COG0293	11911	7600	11846	12814	13150	15109	21845	23886	10275	12895	16157	157488	4808.77	Specifically methylates the uridine in position 2552 of 23S rRNA at the 2'-O position of the ribose in the fully assembled 50S ribosomal subunit (By similarity)
COG0294	33251	18664	17969	15460	54284	56979	35301	37532	41690	36975	50045	398150	14361.5	dihydropteroate synthase
COG0295	7576	6359	5903	7354	7863	10647	15819	17097	6862	8234	9721	103435	3758.44	cytidine deaminase
COG0296	24927	12915	14526	12043	45109	44736	40609	40772	36882	28235	39965	340719	13011.1	Catalyzes the formation of the alpha-1,6-glucosidic linkages in glycogen by scission of a 1,4-alpha-linked oligosaccharide from growing alpha-1,4-glucan chains and the subsequent attachment of the oligosaccharide to the alpha-1,6 position (By similarity)
COG0297	20627	12634	7707	5213	40000	36610	21164	21747	32578	23295	35136	256711	11748.9	starch synthase activity
COG0298	859	1416	5723	4129	1087	3414	17370	16504	1257	1144	1225	54128	6144.27	chaperone-mediated protein complex assembly
COG0299	33089	16854	16511	14938	54320	52363	34096	34963	42559	36233	51144	387070	14393.4	phosphoribosylglycinamide formyltransferase
COG0300	64849	42594	61805	72007	89473	105201	87810	92621	72018	70793	86858	846029	17491.2	Dehydrogenase
COG0301	1178	2144	3178	2559	1119	1298	7557	7697	1170	1266	1509	30675	2482.52	Catalyzes the ATP-dependent transfer of a sulfur to tRNA to produce 4-thiouridine in position 8 of tRNAs, which functions as a near-UV photosensor. Also catalyzes the transfer of sulfur to the sulfur carrier protein ThiS, forming ThiS-thiocarboxylate. This is a step in the synthesis of thiazole, in the thiamine biosynthesis pathway. The sulfur is donated as persulfide by IscS (By similarity)
COG0302	31481	16823	14797	15058	51874	51037	28452	29770	40478	34936	48089	362795	13846.6	GTP cyclohydrolase i
COG0303	18467	11659	21497	19600	20061	27073	49109	48897	16032	20080	23844	276319	12445.5	Molybdenum cofactor synthesis domain protein
COG0304	50716	29918	33258	34563	72242	71055	69305	67969	61086	55101	73246	618459	16790.5	Catalyzes the condensation reaction of fatty acid synthesis by the addition to an acyl acceptor of two carbons from malonyl-ACP (By similarity)
COG0305	35559	17456	17112	16394	57282	56154	35806	36549	43999	38691	53486	408488	15190.4	Replicative dna helicase
COG0306	8654	7841	12809	13312	9419	10576	24577	23752	8888	8732	10625	139185	5944.83	inorganic phosphate transmembrane transporter activity
COG0307	33110	17380	16314	15388	54144	51833	33244	34695	42427	36101	51047	385683	14194	riboflavin synthase, subunit alpha
COG0308	34252	23153	21706	25102	54525	53617	47019	50087	46040	38042	51484	445027	12612.7	aminopeptidase
COG0309	1047	1534	6878	4682	1159	4337	20596	18961	1557	1412	1577	63740	7170.12	Hydrogenase expression formation protein HypE
COG0310	1184	1060	4445	3034	1324	3672	12497	13258	2026	1759	1808	46067	4429.65	Part of the energy-coupling factor (ECF) transporter complex CbiMNOQ involved in cobalt import (By similarity)
COG0311	2354	971	2964	2175	3028	5178	8245	7998	1784	2520	2349	39566	2463.01	Involved in the hydrolysis of glutamine to glutamate and ammonia. Channels an ammonia molecule to PdxS (By similarity)
COG0312	58044	25379	17525	14628	99541	99387	48773	50726	75979	64489	91355	645826	31036.1	peptidase U62 modulator of DNA gyrase
COG0313	34021	18581	16471	14813	55164	53151	34073	34784	43357	37242	52311	393968	14579.3	Catalyzes the 2'-O-methylation of the ribose of cytidine 1402 (C1402) in 16S rRNA (By similarity)
COG0314	15836	8625	12345	13112	17198	22038	23223	22770	13086	16553	20314	185100	4815.54	Molybdopterin
COG0315	16461	9191	15708	15045	17817	23993	32134	32819	13862	17380	21176	215586	7407.79	Together with MoaA, is involved in the conversion of 5'- GTP to cyclic pyranopterin monophosphate (cPMP or molybdopterin precursor Z) (By similarity)
COG0316	47576	26810	27817	28973	69600	70058	53548	56363	54998	51575	70518	557836	16614.1	Iron--sulfur cluster
COG0317	38243	22433	26897	26096	59714	59021	51905	52894	48026	42225	58434	485888	13974.5	In eubacteria ppGpp (guanosine 3'-diphosphate 5-' diphosphate) is a mediator of the stringent response that coordinates a variety of cellular activities in response to changes in nutritional abundance (By similarity)
COG0318	96335	56728	91171	104018	129497	155409	190192	190147	102010	104120	123867	1343494	41691.7	Amp-dependent synthetase and ligase
COG0319	33122	16821	16503	14908	54328	52352	33999	34977	42558	36247	51149	386964	14403.5	metalloendopeptidase activity
COG0320	50551	24781	19881	19278	91294	82728	30384	32132	71469	55738	82173	560409	27361.9	Catalyzes the radical-mediated insertion of two sulfur atoms into the C-6 and C-8 positions of the octanoyl moiety bound to the lipoyl domains of lipoate-dependent enzymes, thereby converting the octanoylated domains into lipoylated derivatives (By similarity)
COG0321	32714	16269	13134	12972	53802	50777	23969	26146	41980	35722	50550	358035	15319.5	Catalyzes the transfer of endogenously produced octanoic acid from octanoyl-acyl-carrier-protein onto the lipoyl domains of lipoate-dependent enzymes. Lipoyl-ACP can also act as a substrate although octanoyl-ACP is likely to be the physiological substrate (By similarity)
COG0322	36589	18252	18900	16775	58251	58332	40131	40561	45504	40033	54993	428321	15431.8	The UvrABC repair system catalyzes the recognition and processing of DNA lesions. UvrC both incises the 5' and 3' sides of the lesion. The N-terminal half is responsible for the 3' incision and the C-terminal half is responsible for the 5' incision (By similarity)
COG0323	7212	7683	14316	14366	7452	10012	31197	27746	8020	8156	9542	145702	8445.19	This protein is involved in the repair of mismatches in DNA. It is required for dam-dependent methyl-directed DNA mismatch repair. May act as a molecular matchmaker , a protein that promotes the formation of a stable complex between two or more DNA-binding proteins in an ATP-dependent manner without itself being part of a final effector complex (By similarity)
COG0324	33140	16821	16503	14908	54333	52351	33996	34976	42559	36245	51148	386980	14403.8	Catalyzes the transfer of a dimethylallyl group onto the adenine at position 37 in tRNAs that read codons beginning with uridine, leading to the formation of N6-(dimethylallyl)adenosine (i(6)A) (By similarity)
COG0325	33105	16854	16512	14903	54322	52399	34059	35239	42574	36270	51172	387409	14406.8	alanine racemase domain protein
COG0326	26416	12531	11203	11517	46684	37675	19876	19673	39044	28953	43552	297124	13144	Molecular chaperone. Has ATPase activity (By similarity)
COG0327	2621	5891	11381	11679	2743	4310	19128	19762	3082	3038	3406	87041	6569.68	dinuclear metal center protein, YbgI
COG0328	32932	18126	17300	15809	54486	52987	36136	35886	42885	36314	51117	393978	14114.7	ribonuclease H activity
COG0329	53905	27426	30955	31893	77865	79327	62364	63123	59523	58411	76087	620879	18874	Catalyzes the condensation of (S)-aspartate-beta- semialdehyde (S)-ASA and pyruvate to 4-hydroxy- tetrahydrodipicolinate (HTPA) (By similarity)
COG0330	55835	30184	33162	32342	78518	84886	82511	84871	63443	61224	80289	687265	21992.1	Band 7 protein
COG0331	33968	18600	22345	20029	55325	53018	39811	38163	43558	37240	52329	414386	13134.9	Malonyl coA-acyl carrier protein transacylase
COG0332	36093	21523	21486	19990	57265	54728	47678	47760	47923	39447	54306	448199	14126.7	Catalyzes the condensation reaction of fatty acid synthesis by the addition to an acyl acceptor of two carbons from malonyl-ACP. Catalyzes the first condensation reaction which initiates fatty acid synthesis and may therefore play a role in governing the total rate of fatty acid production. Possesses both acetoacetyl-ACP synthase and acetyl transacylase activities. Its substrate specificity deter…
COG0333	16046	10326	16076	14441	17633	22611	33706	34018	13844	17171	20603	216475	7729.38	50s ribosomal protein l32
COG0334	22466	14229	25986	30890	23919	25005	39021	39333	21924	22688	28615	294076	7457.12	oxidoreductase activity, acting on the CH-NH2 group of donors, NAD or NADP as acceptor
COG0335	33108	16821	16503	14908	54327	52351	33996	34976	42557	36245	51148	386940	14403.3	This protein is located at the 30S-50S ribosomal subunit interface and may play a role in the structure and function of the aminoacyl-tRNA binding site (By similarity)
COG0336	33111	16821	16503	14908	54327	52352	33999	34976	42557	36246	51149	386949	14403.5	Specifically methylates guanosine-37 in various tRNAs (By similarity)
COG0337	33174	16848	16677	15059	54445	52456	34713	35717	42727	36346	51268	389430	14401.4	3-dehydroquinate synthase
COG0338	4887	6139	1789	3463	5136	6802	6647	5626	5769	6036	7178	59472	1579.35	site-specific DNA-methyltransferase (adenine-specific) activity
COG0339	23603	15283	8792	12881	43503	35188	11889	14147	36168	25829	39333	266616	12514.9	oligopeptidase a
COG0340	33958	17037	17226	15352	55166	52757	36608	37454	43407	37320	52169	398454	14528.2	Biotin- acetyl-CoA-carboxylase ligase
COG0341	31814	16427	16506	16120	53182	51519	32793	34217	41222	34917	49750	378467	13838.1	Part of the Sec protein translocase complex. Interacts with the SecYEG preprotein conducting channel. SecDF uses the proton motive force (PMF) to complete protein translocation after the ATP-dependent function of SecA (By similarity)
COG0342	33237	18310	17086	16477	54432	52566	34572	35912	42675	36414	51245	392926	13971.2	Part of the Sec protein translocase complex. Interacts with the SecYEG preprotein conducting channel. SecDF uses the proton motive force (PMF) to complete protein translocation after the ATP-dependent function of SecA (By similarity)
COG0343	31046	16719	18239	15503	51853	50345	39051	40131	41423	34434	49471	388215	13502.5	Exchanges the guanine residue with 7-aminomethyl-7- deazaguanine in tRNAs with GU(N) anticodons (tRNA-Asp, -Asn, -His and -Tyr). After this exchange, a cyclopentendiol moiety is attached to the 7-aminomethyl group of 7-deazaguanine, resulting in the hypermodified nucleoside queuosine (Q) (7-(((4,5-cis- dihydroxy-2-cyclopenten-1-yl)amino)methyl)-7-deazaguanosine) (By similarity)
COG0344	30005	13232	14834	10743	50820	48648	41836	42061	40145	33147	48121	373592	14890.4	Catalyzes the transfer of an acyl group from acyl- phosphate (acyl-PO(4)) to glycerol-3-phosphate (G3P) to form lysophosphatidic acid (LPA). This enzyme utilizes acyl-phosphate as fatty acyl donor, but not acyl-CoA or acyl-ACP (By similarity)
COG0345	33412	16138	16519	14971	54616	52539	34080	35086	42724	36671	51480	388236	14585.5	pyrroline-5-carboxylate reductase activity
COG0346	63943	39863	35923	43513	106660	104717	77751	73453	85445	71374	98137	800779	25248.7	glyoxalase bleomycin resistance protein dioxygenase
COG0347	35268	17988	23778	23242	56362	50141	56692	57397	47998	37968	54652	461486	14978.5	Nitrogen regulatory protein pii
COG0348	6920	8243	13980	12666	6399	12074	39570	40994	7064	7800	8764	164474	12779	4Fe-4S Ferredoxin iron-sulfur binding domain protein
COG0349	37858	18296	18214	19324	59859	53374	28023	29201	47748	40740	58355	410992	15912.5	Exonuclease involved in the 3' processing of various precursor tRNAs. Initiates hydrolysis at the 3'-terminus of an RNA molecule and releases 5'-mononucleotides (By similarity)
COG0350	16620	9361	16433	15021	18315	23260	37130	35591	14591	17911	21263	225496	8628.91	Involved in the cellular defense against the biological effects of O6-methylguanine (O6-MeG) in DNA. Repairs alkylated guanine in DNA by stoichiometrically transferring the alkyl group at the O-6 position to a cysteine residue in the enzyme. This is a suicide reaction the enzyme is irreversibly inactivated (By similarity)
COG0351	9114	8979	14563	15268	10175	18994	29216	29909	6609	10326	10743	163896	8031.39	phosphomethylpyrimidine kinase
COG0352	33842	22173	26768	25067	55003	62654	51463	51888	40407	37774	50275	457314	13595.1	Condenses 4-methyl-5-(beta-hydroxyethyl)thiazole monophosphate (THZ-P) and 2-methyl-4-amino-5-hydroxymethyl pyrimidine pyrophosphate (HMP-PP) to form thiamine monophosphate (TMP) (By similarity)
COG0353	33111	16821	16503	14908	54327	52352	33999	34975	42557	36246	51149	386948	14403.5	May play a role in DNA repair. It seems to be involved in an RecBC-independent recombinational process of DNA repair. It may act with RecF and RecO (By similarity)
COG0354	31381	14331	10857	11609	52582	48822	17736	19246	40478	34191	48945	330178	16027	Folate-binding protein involved in regulating the level of ATP-DnaA and in the modification of some tRNAs. It is probably a key factor in regulatory networks that act via tRNA modification, such as initiation of chromosomal replication (By similarity)
COG0355	33653	17021	17064	15167	54809	52914	35744	36106	43051	36888	51610	394027	14464	Produces ATP from ADP in the presence of a proton gradient across the membrane (By similarity)
COG0356	33572	16957	16657	15113	54733	52641	34524	35308	42966	36844	51530	390845	14482.6	it plays a direct role in the translocation of protons across the membrane (By similarity)
COG0357	32812	16800	16256	14697	54059	52153	33110	34382	42206	35888	50902	383265	14374.7	Specifically methylates the N7 position of a guanine in 16S rRNA (By similarity)
COG0358	35525	19849	20622	17450	56676	56902	44961	46790	45328	38926	54357	437386	14763.5	DNA primase activity
COG0359	33108	16821	16503	14908	54327	52351	33996	34978	42557	36245	51148	386942	14403.3	Binds to the 23S rRNA (By similarity)
COG0360	33079	16814	16484	14891	54261	52346	33961	34904	42499	36210	51120	386569	14394.2	Binds together with S18 to 16S ribosomal RNA (By similarity)
COG0361	33187	16870	16593	15041	54475	52568	35983	35413	42633	36329	51221	390313	14418	however, it seems to stimulate more or less all the activities of the other two initiation factors, IF-2 and IF-3 (By similarity)
COG0362	19251	8603	2068	2427	38755	32491	4587	3941	30806	21669	32973	197571	14163.9	Catalyzes the oxidative decarboxylation of 6- phosphogluconate to ribulose 5-phosphate and CO(2), with concomitant reduction of NADP to NADPH (By similarity)
COG0363	25257	13299	8771	9823	44847	41711	22995	22636	35899	27697	39682	292617	12754.9	Catalyzes the reversible isomerization-deamination of glucosamine 6-phosphate (GlcN6P) to form fructose 6-phosphate (Fru6P) and ammonium ion (By similarity)
COG0364	22769	10184	6027	8212	42950	39142	18149	14831	34190	25352	36733	258539	13177.5	Glucose-6-phosphate 1-dehydrogenase
COG0365	63529	32687	46134	41709	89614	103124	92601	94274	64995	69115	87526	785308	23869.9	Catalyzes the conversion of acetate into acetyl-CoA (AcCoA), an essential intermediate at the junction of anabolic and catabolic pathways. AcsA undergoes a two-step reaction. In the first half reaction, AcsA combines acetate with ATP to form acetyl-adenylate (AcAMP) intermediate. In the second half reaction, it can then transfer the acetyl group from AcAMP to the sulfhydryl group of CoA, forming …
COG0366	47370	24457	22752	29029	70399	74664	60578	62370	56127	51856	66806	566408	18520	alpha amylase, catalytic
COG0367	25438	11963	16030	12192	27309	30999	48057	47284	24031	26898	34172	304373	12224.6	asparagine synthetase
COG0368	21601	11298	11047	11201	41843	38308	17528	16941	32808	24311	35648	262534	11518.1	Joins Ado-cobinamide-GDP and alpha-ribazole to generate adenosylcobalamin (Ado-cobalamin) (By similarity)
COG0369	18977	10862	6180	10086	38622	32340	5140	5014	30735	21353	32898	212207	12634	Component of the sulfite reductase complex that catalyzes the 6-electron reduction of sulfite to sulfide. This is one of several activities required for the biosynthesis of L- cysteine from sulfate. The flavoprotein component catalyzes the electron flow from NADPH - FAD - FMN to the hemoprotein component (By similarity)
COG0370	3730	8468	19035	17007	4023	8409	29835	29642	5340	4849	5276	135614	10004	Ferrous iron transport protein b
COG0371	19905	6721	451	283	40073	31382	958	606	32151	21650	34933	189113	15827.5	Dehydrogenase
COG0372	37597	22040	25566	25842	59615	60292	46855	47627	46670	41299	56250	469653	13671.5	citrate synthase
COG0373	22854	13350	13282	13522	42904	39701	23179	24316	34383	25500	37138	290129	10791.9	Catalyzes the NADPH-dependent reduction of glutamyl- tRNA(Glu) to glutamate 1-semialdehyde (GSA) (By similarity)
COG0374	800	1389	5636	4060	990	3377	17269	16209	1128	1057	1125	53040	6099.65	Hydrogenase, large subunit
COG0375	2549	2044	5858	4127	2333	6238	17631	16767	2397	2793	3457	66194	5705.52	Probably plays a role in a hydrogenase nickel cofactor insertion step (By similarity)
COG0376	12552	6103	6070	8669	13320	12957	17033	19033	12008	12674	16202	136621	4182.85	Bifunctional enzyme with both catalase and broad- spectrum peroxidase activity (By similarity)
COG0377	32235	14278	19613	14246	53578	54702	44054	44952	41999	35640	50359	405656	15051.1	NDH-1 shuttles electrons from NADH, via FMN and iron- sulfur (Fe-S) centers, to quinones in the respiratory chain. The immediate electron acceptor for the enzyme in this species is believed to be ubiquinone. Couples the redox reaction to proton translocation (for every two electrons transferred, four hydrogen ions are translocated across the cytoplasmic membrane), and thus conserves the redox ene…
COG0378	21725	11985	11012	12701	41076	37816	19936	19509	33196	24440	36697	270093	10989.3	Facilitates the functional incorporation of the urease nickel metallocenter. This process requires GTP hydrolysis, probably effectuated by UreG (By similarity)
COG0379	26357	13977	15966	14652	46991	49319	32053	33668	35090	29614	41510	339197	12381.3	Catalyzes the condensation of iminoaspartate with dihydroxyacetone phosphate to form quinolinate (By similarity)
COG0380	4317	3167	7363	8418	4530	7688	9762	7935	3026	4274	4678	65158	2344.72	synthase
COG0381	23149	12685	12831	11386	43155	40657	24015	22789	34305	25681	37537	288190	11390.9	UDP-N-acetylglucosamine 2-epimerase
COG0382	53297	27062	20803	16807	93957	88738	47808	46885	74538	59242	85949	615086	27447	Synthesis of 3-octaprenyl-4-hydroxybenzoate (By similarity)
COG0383	2106	977	1642	883	1710	4223	4599	4661	1595	2096	2741	27233	1397.43	alpha-mannosidase
COG0384	5118	3517	6415	11704	5886	7911	8878	7397	5018	5635	5811	73290	2232.77	phenazine biosynthesis protein, phzf family
COG0385	13413	10086	20793	22722	14574	19166	22507	25418	10504	13934	16573	189690	5202.77	bile acid
COG0386	32085	18408	17471	20988	53343	49888	24046	26920	41258	34878	49741	369026	13281.8	glutathione peroxidase
COG0387	2191	1162	743	369	1851	4679	2516	1671	2004	2392	3031	22609	1171.99	Calcium Proton
COG0388	65467	31843	31861	39797	107720	97091	71408	68786	89383	70514	100947	774817	27083.3	nitrilase cyanide hydratase and apolipoprotein n-acyltransferase
COG0389	36825	23981	26970	30132	57765	56909	49141	53156	47070	40464	55506	477919	12457.6	Poorly processive error-prone DNA polymerase involved in untargeted mutagenesis. Copies undamaged DNA at stalled replication forks which arise in vivo from mismatched or misaligned primer ends. These misaligned primers can be extended by polIV. Exhibits no 3-5 exonuclease (proofreading) activity. May be involved in translesional synthesis in conjunction with the beta clamp from polIII (By similar…
COG0390	1569	644	737	488	1455	1699	2247	2481	1828	1796	1882	16826	650.943	(ABC) transporter
COG0391	22193	9663	5705	3962	43100	41178	14773	12281	32676	24597	35820	245948	14188.5	Catalyzes the transfer of the 2-phospholactate moiety from lactyl (2) diphospho-(5')guanosine (LPPG) to 7,8-didemethyl- 8-hydroxy-5-deazariboflavin (FO) with the formation of the L- lactyl phosphodiester of 7,8-didemethyl-8-hydroxy-5- deazariboflavin (F420-0) and GMP (By similarity)
COG0392	7269	5302	12546	9789	9140	17808	36979	32889	6980	8617	8509	155828	10825.3	Membrane
COG0393	5338	6003	14030	15370	5880	8757	14107	13671	4774	5882	6235	100047	4255.46	UPF0145 protein
COG0394	38184	22350	28949	30559	60397	57579	43203	45086	49540	41930	56429	474206	12432	PHOsphatase
COG0395	73964	26256	28462	24362	86697	104865	77863	75004	62674	79797	92323	732267	27995.1	Binding-protein-dependent transport systems inner membrane component
COG0396	32671	13774	11317	8775	53941	52139	32864	34084	42055	35789	50772	368181	16235.6	feS assembly ATPase SufC
COG0397	29658	14191	11641	11811	50332	45673	20302	22741	39503	32616	47634	326102	14596	UPF0061 protein
COG0398	47478	20183	10557	9820	87772	77850	29521	30416	69238	52752	78884	514471	28579.8	Snare associated golgi protein
COG0399	66293	32134	36486	26728	108903	109187	91196	93526	86103	74302	102055	826913	30831.7	DegT DnrJ EryC1 StrS aminotransferase
COG0400	34280	14587	9643	8329	55380	49216	26254	29560	45321	37145	53872	363587	17089.9	phospholipase carboxylesterase
COG0401	425	744	85	2117	327	224	404	623	341	392	417	6099	547.151	hydrophobic protein
COG0402	34405	16752	19579	22698	56297	56515	45132	44365	45732	38551	51223	431249	14233.2	deaminase
COG0403	19727	8917	7380	7100	39410	36332	22058	21732	32005	22307	33958	250926	11647.4	The glycine cleavage system catalyzes the degradation of glycine. The P protein binds the alpha-amino group of glycine through its pyridoxal phosphate cofactor
COG0404	104298	40738	40628	23282	133350	145484	112142	122970	98385	112867	145904	1080048	43630.7	The glycine cleavage system catalyzes the degradation of glycine (By similarity)
COG0405	15629	8401	12871	16245	16877	19311	39331	36385	14361	16367	19535	215313	9561.2	gamma-glutamyltransferase activity
COG0406	44611	24366	29887	33595	68777	68206	46492	45474	55951	48351	64110	529820	15089.2	Phosphoglycerate mutase
COG0407	33290	17465	21832	18206	54899	54776	49864	52176	43158	36720	51770	434156	14832.2	Catalyzes the decarboxylation of four acetate groups of uroporphyrinogen-III to yield coproporphyrinogen-III (By similarity)
COG0408	30073	13856	9984	10559	50607	44996	15855	16979	39855	32832	47882	313478	15679.5	Key enzyme in heme biosynthesis. Catalyzes the oxidative decarboxylation of propionic acid side chains of rings A and B of coproporphyrinogen III (By similarity)
COG0409	701	1362	5654	4015	913	3219	17012	16084	1069	947	1036	52012	6057.35	hydrogenase expression formation protein HypD
COG0410	60228	23896	33008	27421	86998	102897	91899	95786	64167	67245	82485	736030	28303.1	amino acid transport
COG0411	39906	16522	31756	24122	46683	66793	88146	92371	33366	44748	48663	533076	24594	(ABC) transporter
COG0412	29358	15520	18810	22189	50327	48558	35705	30754	40769	32739	45382	370111	11835.7	dienelactone hydrolase
COG0413	33074	16866	16218	14758	54326	52234	33135	34222	42495	36155	51323	384806	14469.2	Catalyzes the reversible reaction in which hydroxymethyl group from 5,10-methylenetetrahydrofolate is tranferred onto alpha-ketoisovalerate to form ketopantoate (By similarity)
COG0414	33109	17011	16501	14836	54305	52348	33986	34924	42544	36226	51134	386924	14384.1	Catalyzes the condensation of pantoate with beta-alanine in an ATP-dependent reaction via a pantoyl-adenylate intermediate (By similarity)
COG0415	48512	23873	19681	18692	70064	70034	38825	44379	55008	52355	72012	513435	19845.1	deoxyribo-dipyrimidine photolyase
COG0416	30024	13059	10939	8711	50798	47603	31707	32512	40139	33178	48007	346677	15056.7	Catalyzes the reversible formation of acyl-phosphate (acyl-PO(4)) from acyl- acyl-carrier-protein (acyl-ACP). This enzyme utilizes acyl-ACP as fatty acyl donor, but not acyl-CoA (By similarity)
COG0417	2197	5421	8498	8968	2215	3048	9830	11080	2478	2542	2931	59208	3506.43	DNA polymerase
COG0418	23000	10599	6004	9415	42971	31546	3633	4234	35023	24944	39243	230612	14808.5	Dihydroorotase
COG0419	8917	10845	16121	18661	9902	12704	31694	32093	9739	9345	11546	171567	8594.85	Involved in DNA double-strand break repair (DSBR). The Rad50 Mre11 complex possesses single-strand endonuclease activity and ATP-dependent double-strand-specific 3'-5' exonuclease activity. Rad50 provides an ATP-dependent control of Mre11 by unwinding and or repositioning DNA ends into the Mre11 active site (By similarity)
COG0420	22213	13293	13008	13383	42350	40267	24750	21790	33622	24922	36457	286055	10782.2	Exonuclease
COG0421	29550	15265	14932	13286	51265	55259	41655	44210	38279	33207	45160	382068	14879.2	Catalyzes the production of spermidine from putrescine and decarboxylated S-adenosylmethionine (dcSAM), which serves as an aminopropyl donor (By similarity)
COG0422	22192	12801	10396	12630	42176	38426	17244	17038	33286	24682	36067	266938	11433	thiamine diphosphate biosynthetic process
COG0423	6251	2857	4074	2667	7264	6983	10838	10309	6272	5985	7808	71308	2647.25	Catalyzes the attachment of glycine to tRNA(Gly) (By similarity)
COG0424	35391	21127	23752	25160	56821	55657	42529	43417	45075	39085	54186	442200	12787.5	Maf-like protein
COG0425	11830	10421	16192	19220	12531	12509	18993	20148	12100	12382	15675	162001	3462.58	sulfurtransferase activity
COG0426	38477	15964	10473	8760	78236	67727	16723	16910	61045	43160	66289	423764	26179.4	domain protein
COG0427	4168	7115	14734	16265	5066	9112	17774	18242	4195	4711	4816	106198	5871.34	Acetyl-CoA hydrolase
COG0428	6441	4341	11894	11133	6485	11729	21843	21628	5535	6914	7367	115310	6117.21	zinc transporter
COG0429	19358	11867	12096	14739	38956	32811	7642	8885	31136	21813	33620	232923	11198.4	Alpha beta hydrolase
COG0430	425	379	2497	1751	481	1344	7033	7453	677	654	572	23266	2620.63	Catalyzes the conversion of 3'-phosphate to a 2',3'- cyclic phosphodiester at the end of RNA. The mechanism of action of the enzyme occurs in 3 steps (A) adenylation of the enzyme by ATP
COG0431	30055	17541	21179	27181	50944	48333	23584	22324	40756	33345	46129	361371	11888.6	Nadph-dependent fmn reductase
COG0432	26767	12244	14836	10648	47308	51037	39495	42120	35668	30242	42161	352526	14294.4	Secondary thiamine-phosphate synthase enzyme
COG0433	6875	6800	11239	13319	7846	12755	23803	20799	7683	8220	8315	127654	5787.66	Aaa atpase
COG0434	539	669	1635	1637	520	1331	3921	4534	1149	883	828	17646	1361.71	photosystem i assembly btpa
COG0435	23859	8786	1953	4286	44374	36532	3304	3854	35287	25776	39009	227020	16565.1	glutathione Stransferase
COG0436	85863	42542	58241	52896	129555	131528	121203	120192	104490	93493	126990	1066993	32985.7	aminotransferase
COG0437	10033	13006	26468	17061	11303	20018	75477	74534	10993	11837	13401	284131	24786	4fe-4S ferredoxin iron-sulfur binding domain protein
COG0438	269303	127416	182984	152043	404108	462499	483942	452980	328770	300779	394533	3559357	128235	Glycosyl transferase (Group 1
COG0439	21948	12463	10181	13507	42513	36532	17758	16018	33610	24720	35818	265068	11283.9	acetyl-CoA carboxylase biotin carboxylase
COG0440	32938	16704	16836	15138	54188	52054	35173	35835	42262	36047	50978	388153	14252.7	Acetolactate synthase small subunit
COG0441	34102	17165	16540	14965	55316	53485	34104	35187	43779	37481	52603	394727	14835.2	threonine-tRNA ligase activity
COG0442	33139	17086	16718	15015	54506	52880	34823	35372	42720	36388	51253	389900	14428.6	Catalyzes the attachment of proline to tRNA(Pro) in a two-step reaction proline is first activated by ATP to form Pro- AMP and then transferred to the acceptor end of tRNA(Pro). As ProRS can inadvertently accommodate and process non-cognate amino acids such as alanine and cysteine, to avoid such errors it has two additional distinct editing activities against alanine. One activity is designated a…
COG0443	74835	38608	31426	27966	135853	126066	60159	59353	107828	83368	121472	866934	39190.2	Heat shock protein
COG0444	24760	10683	17722	14798	29529	36106	49097	45263	22575	27263	29674	307470	11975.8	(ABC) transporter
COG0445	30788	16113	14266	13180	51460	47690	28329	29769	40887	33830	48858	355170	13897.8	NAD-binding protein involved in the addition of a carboxymethylaminomethyl (cmnm) group at the wobble position (U34) of certain tRNAs, forming tRNA-cmnm(5)s(2)U34 (By similarity)
COG0446	8779	6452	14035	14582	9950	15713	25569	28892	8450	9856	9878	152156	7240.02	pyridine nucleotide-disulfide oxidoreductase
COG0447	21099	12291	9375	8328	41208	37294	10804	11321	32377	23451	35061	242609	12505.9	Naphthoate synthase
COG0448	22322	12550	9429	6266	42621	39798	24496	23830	33718	25126	36542	276698	12229.8	Catalyzes the synthesis of ADP-glucose, a sugar donor used in elongation reactions on alpha-glucans (By similarity)
COG0449	36504	16729	19448	17541	58333	58840	41773	42109	45816	40185	54946	432224	15591.5	Catalyzes the first step in hexosamine metabolism, converting fructose-6P into glucosamine-6P using glutamine as a nitrogen source (By similarity)
COG0450	28651	17552	19539	24860	48745	45371	34456	31886	39766	31822	44808	367456	10460	alkyl hydroperoxide reductase
COG0451	272988	115685	100273	75577	462495	458863	262944	266078	357413	302956	423554	3098826	139289	Nad-dependent epimerase dehydratase
COG0452	33530	17000	17517	15692	54689	53681	36813	36951	43070	36704	51467	397114	14402.1	Phosphopantothenoylcysteine decarboxylase
COG0454	0	0	0	0	0	0	0	0	0	0	0	0	0	acetyltransferase
COG0455	6684	4823	9101	8125	7461	10740	24346	26246	7403	7887	8955	121771	7201.11	site-determining protein
COG0456	92807	50756	61253	69189	121360	136154	125281	116554	97031	100581	122738	1093704	28506.9	acetyltransferase
COG0457	3190	1798	6215	3729	3439	8936	19069	18056	4849	4611	4765	78657	5935.46	repeat-containing protein
COG0458	33238	15640	16798	15209	54422	52395	35017	36216	42667	36322	51225	389149	14506.6	carbamoyl-phosphate synthetase ammonia chain
COG0459	54102	25056	19674	16962	95367	88888	41503	40842	74571	59590	85573	602128	28444.4	Prevents misfolding and promotes the refolding and proper assembly of unfolded polypeptides generated under stress conditions (By similarity)
COG0460	33285	15567	16994	15974	54503	53028	36295	37440	42697	36419	51428	393630	14505.7	homoserine dehydrogenase
COG0461	33124	16839	17742	15614	54321	52561	37646	37879	42561	36235	51145	395667	14188	orotate phosphoribosyltransferase activity
COG0462	35356	17637	18477	15980	56820	54415	40716	40185	45102	38902	54160	417750	14952.8	Phosphoribosyl pyrophosphate synthase
COG0463	144257	71428	78275	62573	228872	250064	219056	214328	183417	161773	214806	1828849	68324.3	Glycosyl transferase, family 2
COG0464	28688	12238	10070	8270	48853	50971	30482	29100	39192	32081	44390	334335	15089.9	Aaa atpase
COG0465	91933	38351	25430	20042	172654	153547	58070	57178	136003	101465	152601	1007274	55534.6	Acts as a processive, ATP-dependent zinc metallopeptidase for both cytoplasmic and membrane proteins. Plays a role in the quality control of integral membrane proteins (By similarity)
COG0466	15097	11248	22691	19740	16837	22383	54175	54918	14833	16853	20596	269371	15251.9	ATP-dependent serine protease that mediates the selective degradation of mutant and abnormal proteins as well as certain short-lived regulatory proteins. Required for cellular homeostasis and for survival from DNA damage and developmental changes induced by stress. Degrades polypeptides processively to yield small peptide fragments that are 5 to 10 amino acids long. Binds to DNA in a double-stran…
COG0467	18257	7322	4190	2451	37985	33540	11562	11463	30203	20774	32319	210066	12728.1	Circadian clock protein KaiC
COG0468	33712	17485	18711	16206	55175	55098	40228	41706	43650	37417	52305	411693	14579.4	Can catalyze the hydrolysis of ATP in the presence of single-stranded DNA, the ATP-dependent uptake of single-stranded DNA by duplex DNA, and the ATP-dependent hybridization of homologous single-stranded DNAs. It interacts with LexA causing its activation and leading to its autocatalytic cleavage (By similarity)
COG0469	29984	15381	10094	10663	50580	44947	26952	25757	42141	32875	47413	336787	14535.5	Pyruvate kinase
COG0470	2318	1646	316	1304	2041	2510	667	1740	1947	2394	2967	19850	795.355	DNA polymerase III subunit delta'
COG0471	25983	16220	11969	17362	46210	43220	33832	34523	37138	28834	40437	335728	11496.9	Transporter
COG0472	65318	30094	26235	20818	107878	104289	60810	63384	84246	71512	101442	736026	31267	phospho-N-acetylmuramoyl-pentapeptide-transferase activity
COG0473	45215	20853	25593	23054	67658	72073	61169	60752	51482	49949	66394	544192	18712.3	3-isopropylmalate dehydrogenase activity
COG0474	8322	4671	10628	8486	9550	13568	31999	29112	9676	9051	10800	145863	8836.18	P-type atpase
COG0475	26009	15941	15784	17927	45649	47963	36071	33163	37309	28944	41234	345994	11547	Sodium hydrogen exchanger
COG0476	38381	20695	19171	18906	59754	60287	40997	41565	46572	41736	57077	445141	15475	small protein activating enzyme activity
COG0477	0	1	0	1	0	0	0	26	10	3	4	45	7.86708	major facilitator Superfamily
COG0478	19	910	15	1084	10	21	35	94	20	17	10	2235	395.098	Serine Threonine protein kinase
COG0479	17959	12832	17196	16533	19237	24845	34660	36409	15720	19048	23125	237564	7645.92	succinate dehydrogenase
COG0480	39083	20962	27101	23789	61049	63772	63134	64424	48535	43391	58292	513532	16910.8	Catalyzes the GTP-dependent ribosomal translocation step during translation elongation. During this step, the ribosome changes from the pre-translocational (PRE) to the post- translocational (POST) state as the newly formed A-site-bound peptidyl-tRNA and P-site-bound deacylated tRNA move to the P and E sites, respectively. Catalyzes the coordinated movement of the two tRNA molecules, the mRNA and…
COG0481	33158	16821	16521	14931	54348	52381	34153	35037	42571	36271	51151	387343	14403.3	Required for accurate and efficient protein synthesis under certain stress conditions. May act as a fidelity factor of the translation reaction, by catalyzing a one-codon backward translocation of tRNAs on improperly translocated ribosomes. Back- translocation proceeds from a post-translocation (POST) complex to a pre-translocation (PRE) complex, thus giving elongation factor G a second chance to…
COG0482	33555	17349	19486	16719	54772	53722	42838	44720	43207	36901	51699	414968	14332	Catalyzes the 2-thiolation of uridine at the wobble position (U34) of tRNA, leading to the formation of s(2)U34 (By similarity)
COG0483	70054	28339	24204	23309	114071	107845	59359	58844	89022	76126	107094	758267	33746.1	inositol monophosphatase
COG0484	122875	54729	49297	41180	206229	200972	116009	117947	162522	134425	192766	1398951	60196.8	ATP binding to DnaK triggers the release of the substrate protein, thus completing the reaction cycle. Several rounds of ATP-dependent interactions between DnaJ, DnaK and GrpE are required for fully efficient folding. Also involved, together with DnaK and GrpE, in the DNA replication of plasmids through activation of initiation proteins (By similarity)
COG0486	47089	23683	14882	14239	87592	76439	29260	31191	69627	52465	78391	524858	26924.3	Exhibits a very high intrinsic GTPase hydrolysis rate. Involved in the addition of a carboxymethylaminomethyl (cmnm) group at the wobble position (U34) of certain tRNAs, forming tRNA- cmnm(5)s(2)U34 (By similarity)
COG0488	68042	40540	38813	47384	110340	98116	74008	74224	92485	74425	103816	822193	24957.2	(ABC) transporter
COG0489	41587	22637	28915	26403	63291	69074	73191	71376	51995	46227	61503	556199	18716.8	ATP-binding protein
COG0490	22	197	13	62	38	4	17	155	37	45	32	622	61.9086	potassium ion transport
COG0491	74892	53035	83285	87716	101350	126310	154631	151971	79871	83218	100110	1096389	32142.8	Beta-lactamase domain protein
COG0492	77171	35125	36775	31123	121661	120231	80649	80850	93979	83672	114896	876132	33256.1	thioredoxin reductase
COG0493	21495	14357	28781	26381	23807	33365	68785	73100	19539	23413	26654	359677	19563.1	metal cluster binding
COG0494	41830	26038	27941	29733	64034	61530	50658	52215	50994	45297	62008	512278	13825.5	Nudix hydrolase
COG0495	32969	16880	16715	14844	54193	52485	34480	35364	42361	36012	51028	387331	14349.8	Leucyl-trna synthetase
COG0496	23171	13296	10616	11119	42628	37255	17930	17103	35365	26196	39038	273717	11912	Nucleotidase that shows phosphatase activity on nucleoside 5'-monophosphates (By similarity)
COG0497	29062	14728	13489	14153	49767	42901	26501	25539	40946	31507	45992	334585	13126.6	May be involved in recombinational repair of damaged DNA (By similarity)
COG0498	36740	17013	22659	19109	58703	60025	51486	51158	45969	40499	55313	458674	15881	threonine synthase
COG0499	33827	13860	15712	12997	55102	52588	33166	33514	43338	37069	52119	383292	15459.7	May play a key role in the regulation of the intracellular concentration of adenosylhomocysteine (By similarity)
COG0500	3516	449	260	1432	3850	1434	1061	866	4280	3191	5061	25400	1700.01	Methyltransferase
COG0501	16653	12670	28521	30041	18591	25109	43930	44253	16982	17873	20006	274629	10814.9	Protease HtpX homolog
COG0502	23070	13135	11722	13336	42877	38612	21464	22101	34143	25470	37136	283066	10990.1	Catalyzes the conversion of dethiobiotin (DTB) to biotin by the insertion of a sulfur atom into dethiobiotin via a radical- based mechanism (By similarity)
COG0503	33390	20086	20454	21182	54854	52680	29919	32724	43029	36891	51836	397045	13052.2	Catalyzes a salvage reaction resulting in the formation of AMP, that is energically less costly than de novo synthesis (By similarity)
COG0504	33148	16835	16530	15057	54349	52376	34206	35046	42576	36272	51154	387549	14382.6	Catalyzes the ATP-dependent amination of UTP to CTP with either L-glutamine or ammonia as the source of nitrogen (By similarity)
COG0505	33117	15625	16502	14963	54316	52349	33996	34973	42557	36232	51143	385773	14549.5	carbamoyl-phosphate synthetase glutamine chain
COG0506	5107	4168	5341	6289	5466	8031	15634	14784	4730	5578	5759	80887	4009.44	Proline dehydrogenase
COG0507	46363	25070	23464	27172	86931	76906	29164	28676	69832	50746	75601	539925	24242	exodeoxyribonuclease v alpha
COG0508	60070	34836	40263	43448	85067	88349	83336	78904	67116	64758	84538	730685	19626.2	Dehydrogenase
COG0509	30113	16535	19473	17265	51212	55866	41738	43833	38211	33662	45489	393397	13630.1	The glycine cleavage system catalyzes the degradation of glycine. The H protein shuttles the methylamine group of glycine from the P protein to the T protein (By similarity)
COG0510	6522	3496	3305	4746	7658	6834	7455	8154	6533	6511	8209	69423	1730.29	Ethanolamine kinase
COG0511	31146	17092	17622	16140	51887	49573	38135	37549	41380	34434	49379	384337	13247.1	Acetyl-CoA carboxylase, biotin carboxyl carrier protein
COG0512	38252	21316	20597	18910	60026	62788	43072	47345	45533	42247	57595	457681	15728.8	anthranilate synthase
COG0513	47660	40267	40532	46568	69135	70298	83595	87686	58109	52402	68083	664335	16549.2	purine NTP-dependent helicase activity
COG0514	10606	9214	9103	11030	10439	16169	25934	26137	9889	11487	12522	152530	6320.94	atp-dependent dna helicase
COG0515	55290	33085	108455	75431	66571	139531	281192	301142	69050	73155	77086	1279988	90762.9	Serine Threonine protein kinase
COG0516	19863	13019	18058	16578	21639	29164	36162	38100	16884	20947	24744	255158	8126.87	Catalyzes the conversion of inosine 5'-phosphate (IMP) to xanthosine 5'-phosphate (XMP), the first committed and rate- limiting step in the de novo synthesis of guanine nucleotides, and therefore plays an important role in the regulation of cell growth (By similarity)
COG0517	4065	6038	14041	11080	4426	8881	28038	25955	5536	5330	5764	119154	8559.98	Catalyzes the conversion of inosine 5'-phosphate (IMP) to xanthosine 5'-phosphate (XMP), the first committed and rate- limiting step in the de novo synthesis of guanine nucleotides, and therefore plays an important role in the regulation of cell growth (By similarity)
COG0518	63906	26986	26201	24954	106705	98633	47801	54629	83258	69501	99962	702536	30644.7	Catalyzes the synthesis of GMP from XMP (By similarity)
COG0519	33110	16825	16512	14922	54318	52353	34025	34985	42560	36235	51145	386990	14398.2	Catalyzes the synthesis of GMP from XMP (By similarity)
COG0520	60243	27372	25577	21098	102208	100965	70308	71976	80934	66716	93422	720819	29557.4	cysteine desulfurase
COG0521	16131	7426	9919	9262	17563	23243	28698	28711	13593	17081	20762	192389	7340.59	molybdenum cofactor biosynthesis protein
COG0522	33120	16826	16512	14922	54335	52363	34107	35008	42562	36248	51150	387153	14401.4	One of the primary rRNA binding proteins, it binds directly to 16S rRNA where it nucleates assembly of the body of the 30S subunit (By similarity)
COG0523	59393	25778	11012	14020	118748	103812	19693	18857	93886	66968	101653	633820	41524.9	cobalamin synthesis protein
COG0524	104704	48378	37511	33675	170597	157479	91051	90495	135093	114437	160220	1143640	49337.9	pfkb domain protein
COG0525	33183	16914	16540	15712	54366	52388	34209	35517	42650	36308	51200	388987	14292.3	amino acids such as threonine, to avoid such errors, it has a posttransfer editing activity that hydrolyzes mischarged Thr-tRNA(Val) in a tRNA-dependent manner (By similarity)
COG0526	36760	27540	24947	23117	40127	51348	71151	75139	32367	39134	44871	466501	17407.5	Thioredoxin
COG0527	36612	23766	22610	20326	57660	56602	46102	48705	46135	40122	55478	454118	13871.2	Aspartokinase
COG0528	29077	14681	13499	15097	49800	42977	26772	25880	40957	31547	46022	336309	13012.6	UMP kinase activity
COG0529	27055	13751	9890	7663	47434	48778	26465	28533	35620	30206	42187	317582	14189.4	Catalyzes the synthesis of activated sulfate (By similarity)
COG0530	28019	11456	7784	10875	48706	41669	21774	22134	39675	30852	44310	307254	14404.2	exchanger
COG0531	19442	17380	27462	31279	22390	37916	52495	52968	16676	20704	20093	318805	13355.3	amino acid
COG0532	33120	16663	16508	14922	54332	52358	34022	34985	42561	36247	51149	386867	14422.3	One of the essential components for the initiation of protein synthesis. Protects formylmethionyl-tRNA from spontaneous hydrolysis and promotes its binding to the 30S ribosomal subunits. Also involved in the hydrolysis of GTP during the formation of the 70S ribosomal complex (By similarity)
COG0533	33134	16827	16512	14922	54356	52355	34021	34987	42567	36274	51175	387130	14406.9	Required for the formation of a threonylcarbamoyl group on adenosine at position 37 (t(6)A37) in tRNAs that read codons beginning with adenine (By similarity)
COG0534	29508	27534	33514	33601	31299	41317	62983	70580	25480	32523	37626	425965	14641.6	Mate efflux family protein
COG0535	29914	13626	33585	22620	50021	57463	99041	98516	44190	34977	45978	529931	27927	radical SAM domain protein
COG0536	33119	16821	16503	14908	54327	52351	33996	34976	42557	36245	51148	386951	14403.2	An essential GTPase which binds GTP, GDP and possibly (p)ppGpp with moderate affinity, with high nucleotide exchange rates and a fairly low GTP hydrolysis rate (By similarity). It may play a role in control of the cell cycle, stress response, ribosome biogenesis and in those bacteria that undergo differentiation, in morphogenesis control
COG0537	49357	29018	40853	35546	72508	83645	76333	80733	54024	54646	71656	648319	19072.9	histidine triad (hIT) protein
COG0538	28684	12601	12480	10586	49449	47005	24098	24403	38795	31525	46246	325872	14366.5	isocitrate dehydrogenase (NADp)
COG0539	50653	23783	19816	16607	91817	85385	43111	43637	72104	56264	82733	585910	26990.1	thus facilitating recognition of the initiation point. It is needed to translate mRNA with a short Shine-Dalgarno (SD) purine-rich sequence (By similarity)
COG0540	34583	16306	16908	15845	55431	54371	34209	36446	43821	37572	52933	398425	14929.5	aspartate transcarbamylase
COG0541	33122	17019	16515	14930	54330	52355	34025	34985	42560	36248	51150	387239	14374.3	Involved in targeting and insertion of nascent membrane proteins into the cytoplasmic membrane. Binds to the hydrophobic signal sequence of the ribosome-nascent chain (RNC) as it emerges from the ribosomes. The SRP-RNC complex is then targeted to the cytoplasmic membrane where it interacts with the SRP receptor FtsY
COG0542	82934	41395	38742	43017	145329	123547	60409	57023	118608	90344	132462	933810	39663	ATP-dependent CLP protease ATP-binding subunit
COG0543	4991	7252	21466	21201	5762	10519	35535	36278	4968	5693	5812	159477	12203.4	cytochrome-b5 reductase activity, acting on NAD(P)H
COG0544	33085	16818	16502	13979	54295	52291	33824	34653	42535	36197	51125	385304	14523.5	Involved in protein export. Acts as a chaperone by maintaining the newly synthesized protein in an open conformation
COG0545	25473	22689	22913	27641	45396	41290	25738	26770	37117	28152	40335	343514	8167.68	Peptidyl-prolyl cis-trans isomerase
COG0546	77300	39327	37011	42738	138606	127854	56083	57241	108496	85670	123487	893813	37987.8	had-superfamily hydrolase, subfamily ia, variant
COG0547	51428	25121	21411	21484	92184	83574	35563	36988	72303	56818	83312	580186	26658.4	Anthranilate phosphoribosyltransferase
COG0548	34675	19228	23912	23571	56055	54638	41791	42822	44275	38147	53221	432335	12895.5	nag kinase
COG0549	3037	1042	1995	2488	3405	4205	4446	6145	2382	3073	2937	35155	1366.54	carbamate kinase
COG0550	34175	20697	17882	18838	55218	54040	36690	37790	43863	37354	52381	408928	13695.1	Releases the supercoiling and torsional tension of DNA, which is introduced during the DNA replication and transcription, by transiently cleaving and rejoining one strand of the DNA duplex. Introduces a single-strand break via transesterification at a target site in duplex DNA. The scissile phosphodiester is attacked by the catalytic tyrosine of the enzyme, resulting in the formation of a DNA-(5'…
COG0551	722	2553	1740	3270	615	799	2776	2599	707	916	681	17378	1028.87	DNA topoisomerase type I activity
COG0552	33107	16825	16512	14922	54329	52355	34024	34985	42560	36248	51150	387017	14400.6	Involved in targeting and insertion of nascent membrane proteins into the cytoplasmic membrane. Acts as a receptor for the complex formed by the signal recognition particle (SRP) and the ribosome-nascent chain (RNC)
COG0553	29181	18324	25004	26647	50212	52723	44037	45103	41259	32981	44934	410405	11376.1	helicase
COG0554	18388	9363	14926	14795	20391	23625	29564	30017	16317	18617	24154	220157	6375.08	Key enzyme in the regulation of glycerol uptake and metabolism (By similarity)
COG0555	1236	4069	8181	9160	1130	3089	9617	9034	1927	1579	1514	50536	3607.83	(ABC) transporter
COG0556	33162	16821	16503	14909	54343	52352	34000	34984	42569	36272	51152	387067	14405.9	damaged site, the DNA wraps around one UvrB monomer. DNA wrap is dependent on ATP binding by UvrB and probably causes local melting of the DNA helix, facilitating insertion of UvrB beta-hairpin between the DNA strands. Then UvrB probes one DNA strand for the presence of a lesion. If a lesion is found the UvrA subunits dissociate and the UvrB-DNA preincision complex is formed. This complex is subs…
COG0557	47444	21314	12336	13829	87520	73070	23167	23911	70899	52058	78416	503964	28200.7	3'-5' exoribonuclease that releases 5'-nucleoside monophosphates and is involved in maturation of structured RNAs (By similarity)
COG0558	42139	20750	28881	25809	65364	67258	67018	67171	51639	45619	62238	543886	17986.6	cdp-diacylglycerol-glycerol-3-phosphate 3-phosphatidyltransferase
COG0559	62115	25611	35371	27919	88955	108217	98430	104272	64692	69920	85675	771177	30131.3	(ABC) transporter
COG0560	17230	14340	26733	32820	19754	19944	26274	26413	16676	17947	20671	238802	5599.32	phosphoserine phosphatase activity
COG0561	7342	7719	9684	8853	7505	14065	24590	25428	7121	8024	8808	129139	6838.41	,hydrolase
COG0562	586	417	467	993	643	285	1138	2024	809	768	820	8950	473.537	UDP-galactopyranose mutase
COG0563	34727	17835	17099	16687	56151	54457	35907	37497	44743	38400	53278	406781	14768.1	Catalyzes the reversible transfer of the terminal phosphate group between ATP and AMP. Plays an important role in cellular energy homeostasis and in adenine nucleotide metabolism (By similarity)
COG0564	55586	43227	53988	56886	77669	82127	87482	93403	63666	60874	80797	755705	16228.1	pseudouridine synthase activity
COG0565	29136	14076	12423	13142	50013	46030	23208	24523	39203	32153	47056	330963	14004.4	RNA methyltransferase TrmH family, group 1
COG0566	82601	43435	37446	34110	144612	137459	78390	80452	113531	91059	129774	972869	39597.4	Methyltransferase
COG0567	15444	10300	15278	14071	17082	21056	30265	31880	13196	16379	19838	204789	6832.5	2-oxoglutarate dehydrogenase, E1
COG0568	127468	56293	41251	37506	229350	214371	89258	90196	179798	141303	206136	1412930	71050.4	Sigma factors are initiation factors that promote the attachment of RNA polymerase to specific initiation sites and are then released (By similarity)
COG0569	60398	31608	30354	28704	102161	103516	72881	74002	81415	67133	93807	745979	27709.4	Potassium uptake protein
COG0571	33119	16820	16439	14908	54327	52351	33645	34970	42557	36245	51148	386529	14414.9	Digests double-stranded RNA. Involved in the processing of primary rRNA transcript to yield the immediate precursors to the large and small rRNAs (23S and 16S). Also processes some mRNAs, and tRNAs when they are encoded in the rRNA operon (By similarity)
COG0572	6638	5848	5842	5376	6851	11813	13908	16153	6330	7295	8159	94213	3675.13	uridine kinase
COG0573	31414	14832	16092	13219	52841	52513	32041	32760	41261	34604	49407	370984	14558.1	phosphate abc transporter
COG0574	22404	12837	29592	23702	25318	38333	71321	71642	19913	24405	27949	367416	19836.7	phosphotransferase activity, paired acceptors
COG0575	30382	16566	16442	14895	51122	51982	33851	34936	39216	33964	47063	370419	13432.9	phosphatidate Cytidylyltransferase
COG0576	33483	16856	16779	15135	54633	52574	34844	35631	43005	36667	51468	391075	14448.4	Participates actively in the response to hyperosmotic and heat shock by preventing the aggregation of stress-denatured proteins, in association with DnaK and GrpE. It is the nucleotide exchange factor for DnaK and may function as a thermosensor. Unfolded proteins bind initially to DnaJ
COG0577	46164	22356	19327	14927	85544	81585	53870	56281	70912	51748	75819	578533	25096.3	ABC transporter (permease)
COG0578	14887	7179	9077	11619	16516	17126	25509	25774	13792	15192	18609	175280	5881.7	glycerol-3-phosphate dehydrogenase
COG0579	19940	8875	5469	5303	39415	35208	15260	13589	32047	22244	33949	231299	12473.4	malate dehydrogenase (quinone)
COG0580	12012	4656	4629	6854	12636	11611	14971	12362	11540	12045	15201	118517	3717.45	Channel that permits osmotically driven movement of water in both directions. It is involved in the osmoregulation and in the maintenance of cell turgor during volume expansion in rapidly growing cells. It mediates rapid entry or exit of water in response to abrupt changes in osmolarity (By similarity)
COG0581	31849	14936	16740	15778	53197	52879	34483	35230	41760	35080	49755	381687	14244.1	phosphate abc transporter
COG0582	7797	9622	11572	16586	8389	5682	9563	7617	8706	7768	11005	104307	2875.29	Integrase
COG0583	134148	171968	241562	361940	164686	157378	274412	253375	150852	150093	178961	2239375	70520.9	Transcriptional regulator
COG0584	20687	16792	27221	31554	23040	32318	50142	53240	19010	22461	25943	322408	12082.1	glycerophosphoryl diester phosphodiesterase
COG0585	1198	2221	3172	4384	1277	1955	7790	8790	1508	1472	1651	35418	2686.58	Responsible for synthesis of pseudouridine from uracil- 13 in transfer RNAs (By similarity)
COG0586	27166	19714	28885	27895	48568	51337	41179	40858	37844	30143	41389	394978	9848.04	SNARE associated Golgi
COG0587	38253	19155	22967	21115	60103	61385	53889	54478	47305	41899	56982	477531	16017.5	DNA polymerase III (alpha subunit)
COG0588	9498	4812	4510	4090	11128	15642	13514	14103	7123	9837	11733	105990	4054.23	Catalyzes the interconversion of 2-phosphoglycerate and 3-phosphoglycerate (By similarity)
COG0589	39290	27555	61772	61572	41718	65355	124508	118220	36162	43595	45510	665257	32319.9	Universal stress protein
COG0590	33134	17993	16470	18105	54120	49922	34879	34909	44791	36031	50250	390604	13551.5	deaminase
COG0591	41211	28008	32317	42098	61206	65960	60525	71291	48597	44866	59331	555410	14117.8	symporter
COG0592	33417	16861	17970	15806	54587	52754	38405	38568	42921	36593	51393	399275	14243	DNA polymerase processivity factor activity
COG0593	45893	23987	27879	27280	68188	68346	55193	58244	53830	50077	67999	546916	16730.7	it binds specifically double-stranded DNA at a 9 bp consensus (dnaA box) 5'-TTATC CA A CA A-3'. DnaA binds to ATP and to acidic phospholipids (By similarity)
COG0594	31368	16082	14985	14157	52991	49579	29705	30494	41530	34682	48974	364547	14109.1	RNaseP catalyzes the removal of the 5'-leader sequence from pre-tRNA to produce the mature 5'-terminus. It can also cleave other RNA substrates such as 4.5S RNA. The protein component plays an auxiliary but essential role in vivo by binding to the 5'-leader sequence and broadening the substrate specificity of the ribozyme (By similarity)
COG0595	30434	11817	8588	7405	51882	50059	24896	25883	39811	33481	48090	332346	16306.8	Metallo-Beta-Lactamase
COG0596	227438	119895	144096	160229	344177	378936	267343	257362	264805	249895	320808	2734984	82323.8	Alpha beta hydrolase
COG0597	34085	17456	16919	16524	55284	53443	34647	37208	43750	37476	52400	399192	14493.6	This protein specifically catalyzes the removal of signal peptides from prolipoproteins (By similarity)
COG0598	8681	9633	17351	18639	9964	11943	26396	23907	9560	8996	10970	156040	6371.8	magnesium and cobalt transport protein CorA
COG0599	11940	8386	17112	17949	12142	14198	26126	25077	11133	12728	14399	171190	5633.87	Antioxidant protein with alkyl hydroperoxidase activity. Required for the reduction of the AhpC active site cysteine residues and for the regeneration of the AhpC enzyme activity (By similarity)
COG0600	32704	15423	28185	26118	37012	43878	48391	44788	28478	35315	41552	381844	9780.16	Binding-protein-dependent transport systems inner membrane component
COG0601	53120	24241	37607	24590	78542	87902	106565	94575	59507	59576	74529	700754	27618.7	Binding-protein-dependent transport systems inner membrane component
COG0602	20719	15929	11265	12663	40289	35741	18150	18317	33045	23219	35085	264422	10205.9	Catalyzes the conversion of 6-carboxy-5,6,7,8- tetrahydropterin (CPH4) to 7-carboxy-7-deazaguanine (CDG) (By similarity)
COG0603	19818	12936	16044	18178	39351	34786	20646	20788	31957	22182	33908	270594	8783.43	Catalyzes the ATP-dependent conversion of 7-carboxy-7- deazaguanine (CDG) to 7-cyano-7-deazaguanine (preQ(0)) (By similarity)
COG0604	54835	31487	52230	66198	62429	85440	92411	93485	47367	59046	65162	710090	19293.3	alcohol dehydrogenase
COG0605	10974	10802	14237	14045	11573	11022	29937	27509	12416	11739	15127	169381	6768.06	Destroys radicals which are normally produced within the cells and which are toxic to biological systems (By similarity)
COG0606	13527	9578	15452	15468	13589	18385	33176	30869	12234	14482	16658	193418	7515.88	Mg chelatase subunit ChlI
COG0607	79132	46169	46670	45006	122398	122050	91874	94912	97481	86900	117244	949836	29507.4	Rhodanese domain protein
COG0608	27093	14152	12546	13131	47212	39433	24648	23600	39830	29667	44348	315660	12599.9	Single-stranded-DNA-specific exonuclease (RecJ)
COG0609	12359	10632	12818	18830	13808	19890	35273	35236	11952	14032	14715	199545	8905.78	permease protein
COG0610	3146	9625	13872	12510	2883	7056	22557	23045	3865	3533	3829	105921	7560.48	Type I site-specific deoxyribonuclease
COG0611	29300	15408	14277	13750	50269	48904	27145	27916	38763	31950	45777	343459	13484.9	Catalyzes the ATP-dependent phosphorylation of thiamine- monophosphate (TMP) to form thiamine-pyrophosphate (TPP), the active form of vitamin B1 (By similarity)
COG0612	57129	34597	41461	38751	97472	89240	81431	82639	82264	62721	91338	759043	22963.2	peptidase'
COG0613	22135	12225	17453	15817	42731	42068	34738	35370	34091	25303	36866	318797	10816.3	DNA-directed DNA polymerase activity
COG0614	17128	11256	19098	20946	19598	31954	53805	53947	15639	19297	19944	282612	14791.1	Periplasmic binding protein
COG0615	2726	464	320	652	3142	443	578	1524	3543	2239	3981	19612	1390.93	cytidylyltransferase
COG0616	33909	19436	25351	24750	54812	53878	46996	47453	44862	37811	53032	442290	12733.4	Signal peptide peptidase, SppA
COG0617	52195	27241	25614	25441	93119	85857	46559	47601	73640	57980	84405	619652	24996.8	Catalyzes the addition and repair of the essential 3'- terminal CCA sequence in tRNAs without using a nucleic acid template. Adds these three nucleotides in the order of C, C, and A to the tRNA nucleotide-73, using CTP and ATP as substrates and producing inorganic pyrophosphate
COG0618	5168	4511	10221	6818	5650	10055	27813	28545	4870	5902	6008	115561	8944.45	phosphoesterase RecJ domain protein
COG0619	21204	9803	8453	6360	41623	41379	22304	22415	33376	24109	35445	266471	12643.6	Cobalt transport protein
COG0620	4575	6164	13026	17055	5144	7050	12175	10562	4152	5132	5226	90261	4308.96	Catalyzes the transfer of a methyl group from 5- methyltetrahydrofolate to homocysteine resulting in methionine formation (By similarity)
COG0621	64547	34114	34885	30732	106560	99496	76167	74691	86143	70706	100107	778148	27424	Catalyzes the methylthiolation of N6- (dimethylallyl)adenosine (i(6)A), leading to the formation of 2- methylthio-N6-(dimethylallyl)adenosine (ms(2)i(6)A) at position 37 in tRNAs that read codons beginning with uridine (By similarity)
COG0622	5521	6157	13603	8013	6508	12505	39561	34259	5896	6444	6349	144816	12104.6	Phosphodiesterase, mj0936 family
COG0623	36981	15954	13423	12775	58692	52663	26728	27809	46965	39947	57301	389238	17271.2	Enoyl- acyl-carrier-protein reductase NADH
COG0624	48391	26385	48996	50325	54426	72156	119609	113484	41450	52060	58649	685931	29017	succinyl-diaminopimelate desuccinylase activity
COG0625	96298	63308	67812	101413	157199	142941	92823	84528	130904	106277	151021	1194524	32542.2	glutathione Stransferase
COG0626	56785	29103	27062	27318	98290	91893	52718	52248	77325	62410	89220	664372	26215.3	cystathionine
COG0627	4544	5496	10809	15643	5201	7731	7906	8776	4075	5002	4978	80161	3478.18	esterase
COG0628	39427	24850	26605	31392	60141	62999	52391	50630	49459	42739	57442	498075	13338.3	Membrane
COG0629	55279	28086	19470	20423	96786	91789	43107	42459	76720	61139	87671	622929	28510	single-stranded DNA-binding protein
COG0630	24	1637	5701	6812	107	374	5019	3811	105	59	65	23714	2652.28	type II secretion system protein
COG0631	10375	4979	13960	11643	12345	20831	39664	40133	11468	12548	13048	190994	11730.6	Phosphatase
COG0632	26503	14486	13483	14150	46748	42649	26489	25526	37804	29428	42165	319431	12036.8	The RuvA-RuvB complex in the presence of ATP renatures cruciform structure in supercoiled DNA with palindromic sequence, indicating that it may promote strand exchange reactions in homologous recombination. RuvAB is a helicase that mediates the Holliday junction migration by localized denaturation and reannealing. RuvA stimulates, in the presence of DNA, the weak ATPase activity of RuvB (By simil…
COG0633	76151	37905	20822	22177	134844	128139	35490	33816	107575	83626	124103	804648	45026.8	Ferredoxin
COG0634	5782	7143	14004	12207	6321	9689	25846	25420	5530	6406	6660	125008	7569.26	hypoxanthine phosphoribosyltransferase
COG0635	30651	20953	19064	20522	51034	48385	40650	40879	42672	34449	47651	396910	11784.9	Coproporphyrinogen III oxidase
COG0636	28270	12998	14013	12587	49333	48177	24724	26886	37396	30965	44537	329886	13636.4	F(1)F(0) ATP synthase produces ATP from ADP in the presence of a proton or sodium gradient. F-type ATPases consist of two structural domains, F(1) containing the extramembraneous catalytic core and F(0) containing the membrane proton channel, linked together by a central stalk and a peripheral stalk. During catalysis, ATP synthesis in the catalytic domain of F(1) is coupled via a rotary mechanism…
COG0637	39466	19870	19012	21613	60790	55430	39776	36819	51100	42256	59311	445443	15372.3	HAD-superfamily hydrolase subfamily IA variant 3
COG0638	4590	1245	1335	1748	5659	7740	2816	3148	3112	4724	4429	40546	1984.73	The proteasome is a multicatalytic proteinase complex which is characterized by its ability to cleave peptides with Arg, Phe, Tyr, Leu, and Glu adjacent to the leaving group at neutral or slightly basic pH. The proteasome has an ATP-dependent proteolytic activity (By similarity)
COG0639	95	981	584	123	44	78	397	675	88	91	68	3224	320.086	serine threonine-protein phosphatase
COG0640	57888	31955	51970	52868	83578	98801	96819	95131	64892	62775	75858	772535	21655.1	Transcriptional regulator, arsr family
COG0641	2421	4195	4765	2959	2306	6921	14210	14616	2680	3010	3714	61797	4544.84	radical SAM domain protein
COG0642	198293	139298	238948	254562	251289	313491	532876	545627	231924	223096	271715	3201119	130207	Histidine kinase
COG0643	11906	10875	24924	23817	13324	19887	57281	58353	13962	13430	15989	263748	17363	CheA signal transduction histidine kinase
COG0644	95686	41001	31847	29007	177494	163767	66153	64978	138600	106503	155613	1070649	54931.6	geranylgeranyl reductase
COG0645	1747	3169	7026	7864	1618	1795	6784	5936	1977	2032	2195	42143	2505.96	Aminoglycoside phosphotransferase
COG0646	32745	14027	13123	11960	54156	47293	25425	27925	43854	35498	52420	358426	15595.2	homocysteine S-methyltransferase activity
COG0647	16495	6445	10589	5828	18952	22231	29150	29389	15018	17256	21842	193195	7961.22	Hydrolase
COG0648	3084	2685	7077	5777	3774	7277	17601	17968	3024	3505	3366	75138	5652.72	Endonuclease IV plays a role in DNA repair. It cleaves phosphodiester bonds at apurinic or apyrimidinic sites (AP sites) to produce new 5'-ends that are base-free deoxyribose 5-phosphate residues. It preferentially attacks modified AP sites created by bleomycin and neocarzinostatin (By similarity)
COG0649	31922	14130	19606	14254	53346	53804	44046	44956	41537	35199	49845	402645	14894.2	NDH-1 shuttles electrons from NADH, via FMN and iron- sulfur (Fe-S) centers, to quinones in the respiratory chain. The immediate electron acceptor for the enzyme in this species is believed to be ubiquinone. Couples the redox reaction to proton translocation (for every two electrons transferred, four hydrogen ions are translocated across the cytoplasmic membrane), and thus conserves the redox ene…
COG0650	510	290	2272	1755	501	633	6863	5786	862	663	550	20685	2289.2	Respiratory-chain NADH dehydrogenase, subunit 1
COG0651	15521	7938	15929	16695	17076	20368	32132	31826	14986	16354	19500	208325	7176.81	Monovalent cation H antiporter subunit D
COG0652	78863	39070	30805	31567	140329	133609	63438	65404	108821	87556	126155	905617	40499	peptidyl-prolyl cis-trans isomerase activity
COG0653	33476	17885	17464	15232	54682	52855	35443	36086	42849	36660	51488	394120	14246.9	Part of the Sec protein translocase complex. Interacts with the SecYEG preprotein conducting channel. Has a central role in coupling the hydrolysis of ATP to the transfer of proteins into and across the cell membrane, serving
COG0654	61523	33952	44672	47331	86028	98850	84489	76682	64496	67226	84128	749377	20172.8	oxidoreductase activity, acting on paired donors, with incorporation or reduction of molecular oxygen, NAD(P)H as one donor, and incorporation of one atom of oxygen
COG0655	9618	8606	23950	27724	10851	16530	44420	46321	9244	10751	10697	218712	14090.3	Nadph-dependent fmn reductase
COG0656	5461	3754	7367	12156	6229	7559	10330	9995	5316	6159	6156	80482	2524.74	reductase
COG0657	19881	18213	29918	39071	22933	29638	38874	38724	20036	21032	22160	300480	8309.62	alpha beta hydrolase fold-3 domain protein
COG0658	6717	3968	2848	2570	6525	7598	10560	8409	6646	7160	8884	71885	2504.02	DNA internalization-related competence protein ComEC Rec2
COG0659	49171	29618	24620	32091	88545	78171	31039	31730	71955	54723	79686	571349	23870	sulfate transporter
COG0661	69938	34392	32807	35931	130497	117900	42574	44444	103525	77976	116231	806215	37917.2	Required, probably indirectly, for the hydroxylation of 2-octaprenylphenol to 2-octaprenyl-6-hydroxy-phenol, the fourth step in ubiquinone biosynthesis (By similarity)
COG0662	44178	17717	19453	18021	65620	64666	44097	44219	53098	48333	65269	484671	18484.4	Mannose-1-phosphate guanylyltransferase Mannose-6-phosphate isomerase
COG0663	16840	15110	25397	27970	17600	27210	35091	36398	14359	18842	21363	256180	7726.21	Transferase
COG0664	93359	49533	53393	51229	152888	161947	131146	128233	129433	105045	145155	1201361	41881.2	transcriptional regulator, crp fnr family
COG0665	130425	60638	71686	71729	180294	182532	144138	147423	141237	140767	185819	1456688	45489.6	Catalyzes the last two steps in the biosynthesis of 5- methylaminomethyl-2-thiouridine (mnm(5)s(2)U) at the wobble position (U34) in tRNA. Catalyzes the FAD-dependent demodification of cmnm(5)s(2)U34 to nm(5)s(2)U34, followed by the transfer of a methyl group from S-adenosyl-L-methionine to nm(5)s(2)U34, to form mnm(5)s(2)U34 (By similarity)
COG0666	14632	11334	21641	19700	14031	18856	39345	37229	15166	15918	19246	227098	9223.46	Ankyrin Repeat
COG0667	62309	26784	38094	34967	89439	97601	85834	82249	71395	67985	86895	743552	24372.9	Aldo keto reductase
COG0668	42992	30002	37280	45578	64505	67363	64768	70252	52396	47448	63064	585648	13556.9	Mechanosensitive ion channel
COG0669	33122	16820	16503	14928	54321	52350	33999	34976	42557	36245	51149	386970	14399.6	Reversibly transfers an adenylyl group from ATP to 4'- phosphopantetheine, yielding dephospho-CoA (dPCoA) and pyrophosphate (By similarity)
COG0670	29780	13102	7378	5722	50596	45939	22302	22786	39686	32798	47861	317950	16074.1	Membrane
COG0671	8055	8800	13262	14202	8744	13371	24442	25939	6416	8374	8578	140183	6661.65	PHOsphatase
COG0672	783	703	1158	2353	723	2697	3691	4363	1382	1085	1086	20024	1275	)-iron permease
COG0673	120416	47543	48908	37650	171101	178998	147598	136927	131798	131760	167642	1320341	51742.9	oxidoreductase
COG0674	5267	5423	16000	10915	6285	13094	45973	44786	6078	6227	5909	165957	15392.8	Oxidoreductase required for the transfer of electrons from pyruvate to flavodoxin (By similarity)
COG0675	8345	4325	4494	7170	7795	22531	12746	13802	10759	10926	11991	114884	5102.77	Transposase
COG0676	966	1836	613	3261	962	562	1098	1486	1008	1074	1189	14055	747.919	Aldose 1epimerase
COG0677	8749	7134	12050	12119	9105	10839	21732	21419	8940	9809	10933	132829	4926.07	Dehydrogenase
COG0678	12174	6632	5697	5579	13174	14841	15848	17410	10551	12934	16306	131146	4298.54	peroxiredoxin
COG0679	29330	21282	22098	26093	49908	47725	24303	25335	38823	33466	46754	365117	10850.5	Auxin Efflux Carrier
COG0680	1730	1913	9273	6152	1911	5911	27892	25886	2351	2272	2384	87675	9667.95	Hydrogenase maturation protease
COG0681	52701	25241	19715	18422	94309	88967	43037	44522	73074	58215	84649	602852	27643	Signal peptidase i
COG0682	33553	19071	23364	21885	55035	54374	40343	42549	43606	37177	52010	422967	12894.2	Transfers the N-acyl diglyceride group on what will become the N-terminal cysteine of membrane lipoproteins (By similarity)
COG0683	76975	32747	49952	40292	105285	132924	147828	145046	78313	86354	104122	999838	40389.4	(ABC) transporter
COG0684	10200	9434	14203	17964	10912	11799	18436	13615	9089	10900	12422	138974	3177.13	Globally modulates RNA abundance by binding to RNase E (Rne) and regulating its endonucleolytic activity. Can modulate Rne action in a substrate-dependent manner by altering the composition of the degradosome. Modulates RNA-binding and helicase activities of the degradosome (By similarity)
COG0685	35882	17638	22560	22083	57729	57195	38247	39982	44510	39363	54060	429249	14011.3	Methylenetetrahydrofolate reductase
COG0686	21160	11873	15622	13881	22664	25582	30556	32918	18884	21721	27711	242572	6766.91	alanine dehydrogenase
COG0687	19193	10327	11097	12287	21062	23180	28713	29021	17425	21248	24774	218327	6574.43	polyamine binding
COG0688	13576	10919	14237	13348	14607	16158	28807	30483	12078	14476	18120	186809	6550.98	Phosphatidylserine decarboxylase
COG0689	12070	6958	11796	13404	13056	13771	22537	21136	12001	12416	15696	154841	4388.52	Phosphorolytic exoribonuclease that removes nucleotide residues following the -CCA terminus of tRNA and adds nucleotides to the ends of RNA molecules by using nucleoside diphosphates as substrates (By similarity)
COG0690	26948	15589	16017	14749	47539	49706	32001	33923	35758	30221	42296	344747	12349.4	preprotein translocase subunit SecE
COG0691	33114	16820	16503	14908	54327	52351	33995	34976	42557	36245	51148	386944	14403.4	Binds specifically to the SsrA RNA (tmRNA) and is required for stable association of SsrA with ribosomes (By similarity)
COG0692	7341	6439	8256	11329	8152	6965	10825	11664	7292	7041	9011	94315	1879.8	Excises uracil residues from the DNA which can arise as a result of misincorporation of dUMP residues by DNA polymerase or due to deamination of cytosine (By similarity)
COG0693	12950	12840	29929	35623	13480	17094	35238	36390	13275	13559	16454	236832	10339	PfpI family
COG0694	33774	17400	15148	13310	54908	52567	30811	31144	43169	36923	51986	381140	15069.1	metallo-sulfur cluster assembly
COG0695	52948	24769	18914	23769	94680	87366	40729	42701	73426	58575	84822	602699	27228.4	Glutaredoxin
COG0696	23693	13287	12187	10981	43427	37280	21086	21464	35656	26585	39585	285231	11563.1	Catalyzes the interconversion of 2-phosphoglycerate and 3-phosphoglycerate (By similarity)
COG0697	73279	35834	38502	29796	99038	105525	78914	86257	74727	79470	105023	806365	27301.9	membrane
COG0698	17917	7333	10438	6416	20213	21118	30939	30348	16586	18551	23582	203441	8188.07	Isomerase
COG0699	78	8	24	306	65	6	33	224	70	80	99	993	93.4592	Dynamin family
COG0700	299	1315	1846	728	236	724	3513	4053	254	287	388	13643	1359.43	nucleoside recognition domain protein
COG0701	6145	4092	8659	8098	6625	11591	25558	26050	5404	6799	7390	116411	7766.61	Predicted permease
COG0702	69029	27568	21717	22267	111898	108834	47023	50139	88428	74943	103828	725674	34535.2	epimerase dehydratase
COG0703	33524	16892	16669	15049	54685	52608	34870	35607	43039	36703	51493	391139	14485.1	Catalyzes the specific phosphorylation of the 3-hydroxyl group of shikimic acid using ATP as a cosubstrate (By similarity)
COG0704	15548	9018	16315	15063	17381	22802	34331	34705	13866	16846	19981	215856	8128.44	Plays a role in the regulation of phosphate uptake
COG0705	14934	16689	23013	24055	15239	19307	39353	38579	15800	17026	18842	242837	8862.43	rhomboid family
COG0706	33150	17022	16518	15929	54363	52416	34177	35445	42582	36294	51174	389070	14248.8	Required for the insertion and or proper folding and or complex formation of integral membrane proteins into the membrane. Involved in integration of membrane proteins that insert both dependently and independently of the Sec translocase complex, as well as at least some lipoproteins
COG0707	35997	18104	18174	17733	57996	58984	38210	38795	45438	39587	54300	423318	15380.2	Cell wall formation. Catalyzes the transfer of a GlcNAc subunit on undecaprenyl-pyrophosphoryl-MurNAc-pentapeptide (lipid intermediate I) to form undecaprenyl-pyrophosphoryl-MurNAc- (pentapeptide)GlcNAc (lipid intermediate II) (By similarity)
COG0708	38491	18853	16234	17037	59811	56058	36832	36606	47929	42014	58388	428253	16143.1	Exodeoxyribonuclease III
COG0709	20335	8121	4251	3866	40721	35234	12374	11406	31106	22648	34224	224286	13319.2	Synthesizes selenophosphate from selenide and ATP (By similarity)
COG0710	354	33	389	335	279	229	1352	905	392	400	294	4962	364.548	Type I DHQase
COG0711	61550	27462	22842	19502	103444	97230	52046	54841	80806	67667	97143	684533	30433.2	F(1)F(0) ATP synthase produces ATP from ADP in the presence of a proton or sodium gradient. F-type ATPases consist of two structural domains, F(1) containing the extramembraneous catalytic core and F(0) containing the membrane proton channel, linked together by a central stalk and a peripheral stalk. During catalysis, ATP synthesis in the catalytic domain of F(1) is coupled via a rotary mechanism…
COG0712	33100	16834	16433	14852	54324	52341	33780	34647	42564	36238	51129	386242	14418	F(1)F(0) ATP synthase produces ATP from ADP in the presence of a proton or sodium gradient. F-type ATPases consist of two structural domains, F(1) containing the extramembraneous catalytic core and F(0) containing the membrane proton channel, linked together by a central stalk and a peripheral stalk. During catalysis, ATP synthesis in the catalytic domain of F(1) is coupled via a rotary mechanism…
COG0713	34116	14161	17837	13268	55944	55997	39251	39469	42554	37247	51776	401620	15613.8	NDH-1 shuttles electrons from NADH, via FMN and iron- sulfur (Fe-S) centers, to quinones in the respiratory chain. The immediate electron acceptor for the enzyme in this species is believed to be ubiquinone. Couples the redox reaction to proton translocation (for every two electrons transferred, four hydrogen ions are translocated across the cytoplasmic membrane), and thus conserves the redox ene…
COG0714	39379	26034	44682	42187	43203	62317	102534	100631	36706	43428	47160	588261	25283.7	ATPase activity
COG0715	23830	17114	36025	39134	26775	33192	47476	40255	23647	26566	30259	344273	8880.96	(ABC) transporter
COG0716	18763	11093	2406	7016	38198	31517	2705	4763	30467	21056	32584	200568	13374.6	Low-potential electron donor to a number of redox enzymes (By similarity)
COG0717	32754	14223	13178	13093	53734	51789	26530	25807	41228	35452	50676	358464	15500.5	Deoxycytidine triphosphate deaminase
COG0718	30873	16471	16470	14852	51591	49061	33934	34947	41377	34007	49026	372609	13446.9	Binds to DNA and alters its conformation. May be involved in regulation of gene expression, nucleoid organization and DNA protection (By similarity)
COG0719	62464	26058	19452	15541	104741	100937	55862	57651	81000	68327	97183	689216	32084.9	Fe-S assembly protein
COG0720	39279	18282	11598	9303	78360	68149	30134	32208	63393	44024	67647	462377	24342	6-pyruvoyltetrahydropterin synthase activity
COG0721	32170	13703	15893	13279	53494	51857	33520	34373	41680	35264	50077	375310	14801	Allows the formation of correctly charged Asn-tRNA(Asn) or Gln-tRNA(Gln) through the transamidation of misacylated Asp- tRNA(Asn) or Glu-tRNA(Gln) in organisms which lack either or both of asparaginyl-tRNA or glutaminyl-tRNA synthetases. The reaction takes place in the presence of glutamine and ATP through an activated phospho-Asp-tRNA(Asn) or phospho-Glu-tRNA(Gln) (By similarity)
COG0722	18919	13652	11577	15029	38439	31837	5873	7176	30649	21157	32825	227133	11206.5	Stereospecific condensation of phosphoenolpyruvate (PEP) and D-erythrose-4-phosphate (E4P) giving rise to 3-deoxy-D- arabino-heptulosonate-7-phosphate (DAHP) (By similarity)
COG0723	34910	14247	10579	9045	56600	55882	30245	30643	43454	38133	52758	376496	17421.3	Component of the ubiquinol-cytochrome c reductase complex (complex III or cytochrome b-c1 complex), which is a respiratory chain that generates an electrochemical potential coupled to ATP synthesis (By similarity)
COG0724	56588	24680	12107	10863	114693	101025	19387	19893	91510	63459	99142	613347	40297.4	Rna-binding protein
COG0725	4939	6328	11388	13142	5711	9650	21908	19298	4895	5691	5549	108499	6015.83	ABC transporter, periplasmic molybdate-binding protein
COG0726	31487	22184	39428	34553	34819	52852	87808	87288	27234	34939	39065	491657	22540	4-amino-4-deoxy-alpha-L-arabinopyranosyl undecaprenyl phosphate biosynthetic process
COG0727	19799	12238	10180	9762	39529	34705	14827	15642	31988	22504	34271	245445	10953.1	Fe-S-cluster oxidoreductase
COG0728	32270	15140	16860	15270	53908	52738	35826	35812	41925	35631	50260	385640	14404.4	Integral membrane protein (MviN
COG0729	2401	5949	8320	10258	2306	2920	9166	8905	2361	2554	2733	57873	3284.04	Surface Antigen
COG0730	66983	41085	55954	55572	91550	98337	97017	99671	71918	72554	95280	845921	20624.2	Membrane
COG0731	426	38	766	695	355	212	2752	2343	483	406	285	8761	893.78	radical SAM domain protein
COG0732	5202	11183	16697	15504	4679	8782	30090	31015	6329	5905	6261	141647	9632.11	Restriction modification system DNA (Specificity
COG0733	19687	12548	10343	18190	38981	33212	13864	15879	31022	21665	33475	248866	9857.56	Transporter
COG0735	77319	38727	38254	32137	120468	126128	81980	84502	93545	85287	116258	894605	33227.3	Ferric uptake regulator, Fur family
COG0736	14424	6933	9280	7643	16306	20773	26730	26946	12611	15627	18796	176069	6906.21	Transfers the 4'-phosphopantetheine moiety from coenzyme A to a Ser of acyl-carrier-protein (By similarity)
COG0737	8672	11705	11850	9590	9267	12780	28895	31374	9027	10022	10593	153775	8108.58	5-Nucleotidase
COG0738	9713	9495	11021	14311	10566	9515	19734	20874	9947	9756	11849	136781	4144.8	Transporter
COG0739	53450	40566	56752	57984	57260	80227	109593	113027	49958	58625	69439	746881	23725.1	peptidase'
COG0740	88807	39627	19349	19753	169428	149510	40502	41997	132815	98432	147906	948126	56716.5	Cleaves peptides in various proteins in a process that requires ATP hydrolysis. Has a chymotrypsin-like activity. Plays a major role in the degradation of misfolded proteins (By similarity)
COG0741	24273	21557	46329	47332	26377	34180	73693	71231	22742	25821	31846	425381	18860.8	transglycosylase
COG0742	33107	16812	16487	14905	54327	52315	34007	34962	42556	36241	51144	386863	14402.1	Methyltransferase
COG0743	34638	15290	16101	14681	56262	51328	32734	34295	44440	37080	53642	390491	15235.4	Catalyzes the NADP-dependent rearrangement and reduction of 1-deoxy-D-xylulose-5-phosphate (DXP) to 2-C-methyl-D-erythritol 4-phosphate (MEP) (By similarity)
COG0744	31048	20418	22211	24370	53038	53525	38762	37527	41834	34082	47183	403998	11649.3	penicillin-binding protein
COG0745	234157	140447	183889	201801	347221	377004	382815	373422	290715	260956	343425	3135852	86239.6	regulatoR
COG0746	14187	8763	15593	13955	15039	20728	31884	31804	12550	15094	18981	198578	7487.47	Transfers a GMP moiety from GTP to Mo-molybdopterin (Mo- MPT) cofactor (Moco or molybdenum cofactor) to form Mo- molybdopterin guanine dinucleotide (Mo-MGD) cofactor (By similarity)
COG0747	56020	27346	50042	36520	82394	98032	130328	115200	62345	63180	77763	799170	32006.2	Extracellular solute-binding protein, family 5
COG0748	18717	7663	976	1510	38266	31210	1336	1453	30279	20955	32769	185134	14725.5	pyridoxamine 5-phosphate
COG0749	33666	18628	17342	17181	54932	53810	36385	37472	43252	37011	51978	401657	14118.9	DNA polymerase
COG0750	34341	17671	17980	15727	55481	55560	37979	38348	44259	37885	52936	408167	14802.3	Membrane-associated zinc metalloprotease
COG0751	26897	14035	12658	12359	47273	45920	24061	25099	36448	30429	43468	318647	13034.5	Glycyl-tRNA synthetase beta subunit
COG0752	26868	13969	12434	12251	47065	45371	23179	24670	36287	30261	43341	315696	13006.9	glycyl-tRNA synthetase, alpha subunit
COG0753	2205	8330	18082	24783	2389	4414	16437	14973	2963	2772	2608	99956	8061.87	Catalase
COG0754	152	339	96	2844	128	139	686	860	112	142	99	5597	817.076	Glutathionylspermidine synthase
COG0755	33497	17596	14049	11661	54812	53663	38358	40443	43653	36893	51681	396306	15542.3	cytochrome c
COG0756	15577	9199	14212	12484	17145	20815	28602	30615	13341	16514	19923	198427	6602.24	This enzyme is involved in nucleotide metabolism it produces dUMP, the immediate precursor of thymidine nucleotides and it decreases the intracellular concentration of dUTP so that uracil cannot be incorporated into DNA (By similarity)
COG0757	32934	16934	16088	14632	54239	52304	32544	33997	42281	36161	51090	383204	14466.3	Catalyzes a trans-dehydration via an enolate intermediate (By similarity)
COG0758	11224	9507	15097	16756	11504	15815	30520	31544	10964	12132	13938	179001	7634.18	DNA protecting protein DprA
COG0759	33010	15927	15980	13741	54193	52208	33598	34230	42394	36059	50973	382313	14692.7	Could be involved in insertion of integral membrane proteins into the membrane (By similarity)
COG0760	22575	18007	32505	34598	22940	26202	67568	69949	22864	24097	29419	370724	17981.3	peptidyl-prolyl cis-trans isomerase
COG0761	32114	15127	16108	14830	53266	51140	32887	34335	41378	35036	49833	376054	14210.8	Converts 1-hydroxy-2-methyl-2-(E)-butenyl 4-diphosphate into isopentenyl diphosphate (IPP) and dimethylallyl diphosphate (DMAPP) (By similarity)
COG0762	19288	8411	806	2274	38374	33792	645	1181	30224	21480	33481	189956	15101.1	integral membrane protein
COG0763	48100	22211	14305	12213	88070	77547	26088	28982	69508	53071	79683	519778	28084.8	Condensation of UDP-2,3-diacylglucosamine and 2,3- diacylglucosamine-1-phosphate to form lipid A disaccharide, a precursor of lipid A, a phosphorylated glycolipid that anchors the lipopolysaccharide to the outer membrane of the cell (By similarity)
COG0764	43463	22559	21098	18915	65121	62424	47284	48833	52022	47341	65574	494634	17216.6	Involved in unsaturated fatty acids biosynthesis. Catalyzes the dehydration of short chain beta-hydroxyacyl-ACPs and long chain saturated and unsaturated beta-hydroxyacyl-ACPs (By similarity)
COG0765	50493	26774	29101	29257	74235	75524	42944	43218	56299	55813	73335	556993	18316.3	amino acid AbC transporter
COG0766	33121	17052	16514	14981	54330	52355	33999	34989	42560	36245	51150	387296	14363.3	Cell wall formation. Adds enolpyruvyl to UDP-N- acetylglucosamine (By similarity)
COG0767	33115	16957	19554	20613	54297	50128	42963	46366	45155	35905	50518	415571	13521.4	ABC transporter (permease)
COG0768	71175	35831	36158	32736	114905	114404	75236	78497	88959	77998	107468	833367	30418.4	penicillin-binding protein
COG0769	35827	17801	19507	16733	57594	58483	43115	43300	44601	39184	54010	430155	15338.2	Catalyzes the addition of meso-diaminopimelic acid to the nucleotide precursor UDP-N-acetylmuramoyl-L-alanyl-D-glutamate (UMAG) in the biosynthesis of bacterial cell-wall peptidoglycan (By similarity)
COG0770	29079	14704	13499	14165	49824	42924	26651	25586	40949	31553	46051	334985	13138.6	UDP-N-acetylmuramoylalanyl-D-glutamyl-2,6-diaminopimelate-D-alanyl-D-alanine ligase activity
COG0771	33119	16821	16503	14908	54327	52351	33996	34976	42557	36245	51148	386951	14403.2	Cell wall formation. Catalyzes the addition of glutamate to the nucleotide precursor UDP-N-acetylmuramoyl-L-alanine (UMA) (By similarity)
COG0772	68705	34885	33822	30883	111786	109797	69609	70887	86892	75211	104754	797231	29761.5	Cell Division Protein
COG0773	35429	22318	24772	25651	56584	55261	44570	47145	45257	38875	54091	449953	12528.6	cell wall formation (By similarity)
COG0774	30765	15771	14100	12188	51244	47008	25930	28812	40737	33706	48777	349038	14072.4	involved in the biosynthesis of lipid A, a phosphorylated glycolipid that anchors the lipopolysaccharide to the outer membrane of the cell (By similarity)
COG0775	3899	6772	10346	14650	3477	6905	18911	18982	3601	4137	4811	96491	6060.14	Catalyzes the irreversible cleavage of the glycosidic bond in both 5'-methylthioadenosine (MTA) and S- adenosylhomocysteine (SAH AdoHcy) to adenine and the corresponding thioribose, 5'-methylthioribose and S-ribosylhomocysteine, respectively (By similarity)
COG0776	61023	45804	47331	44511	84470	89720	99435	102192	68070	66540	88676	797772	21505.8	This protein is one of the two subunits of integration host factor, a specific DNA-binding protein that functions in genetic recombination as well as in transcriptional and translational control (By similarity)
COG0777	30831	17145	19030	19086	51496	48121	30454	29451	41146	33769	48752	369281	12434.5	Component of the acetyl coenzyme A carboxylase (ACC) complex. Biotin carboxylase (BC) catalyzes the carboxylation of biotin on its carrier protein (BCCP) and then the CO(2) group is transferred by the transcarboxylase to acetyl-CoA to form malonyl- CoA (By similarity)
COG0778	23509	23379	50093	56128	25460	32822	83013	82547	25640	25755	29439	457785	23076.8	nitroreductase
COG0779	26150	14381	11783	13158	46247	41688	21138	21581	37243	28904	41795	304068	12473.7	Required for maturation of 30S ribosomal subunits (By similarity)
COG0780	18513	9329	10352	9135	38127	34030	18264	17207	30260	20750	32481	238448	10460	Catalyzes the NADPH-dependent reduction of 7-cyano-7- deazaguanine (preQ0) to 7-aminomethyl-7-deazaguanine (preQ1) (By similarity)
COG0781	33160	17216	16725	15371	54399	52394	34104	35691	42901	36360	51265	389586	14303.8	DNA-dependent transcription, termination
COG0782	19548	20589	30975	34124	21346	26173	53357	51469	17911	21120	24847	321459	12476.8	Necessary for efficient RNA polymerase transcription elongation past template-encoded arresting sites. The arresting sites in DNA have the property of trapping a certain fraction of elongating RNA polymerases that pass through, resulting in locked ternary complexes. Cleavage of the nascent transcript by cleavage factors such as GreA or GreB allows the resumption of elongation from the new 3'termi…
COG0783	5451	7241	10400	13750	5334	10415	19331	17619	6624	6715	7270	110150	4891.09	oxidoreductase activity, oxidizing metal ions
COG0784	13307	7611	10959	13303	14569	18916	36298	30834	14476	14597	16979	191849	8575.16	response regulator
COG0785	29803	12292	9657	6790	51493	52925	23507	27163	39152	32891	46196	331869	16303.3	Cytochrome c biogenesis protein
COG0786	16253	10678	9695	11008	36068	29142	550	755	28409	18432	29495	190485	12093.6	Sodium Glutamate Symporter
COG0787	29291	16100	14725	16410	50115	43214	29018	28792	41600	31953	46336	347554	12532.4	Catalyzes the interconversion of L-alanine and D- alanine. May also act on other amino acids (By similarity)
COG0788	21496	11169	7386	12693	41634	36502	8570	9082	32625	23929	35431	240517	12874.8	formyltetrahydrofolate deformylase
COG0789	49326	37009	57036	69935	56294	80061	110083	113342	42618	53467	56908	726079	25450.5	Transcriptional regulator
COG0790	15419	16032	22537	27523	16115	12497	30670	26761	16410	15733	20350	220047	6016.05	Sel1 domain protein repeat-containing protein
COG0791	36800	21169	16996	13577	58282	64482	44735	47024	43995	40406	53676	441142	16735	NLP P60 protein
COG0792	10829	8479	13309	14061	11135	14977	26557	25419	10123	11639	13403	159931	5966.71	UPF0102 protein
COG0793	66933	33860	32803	32582	108155	97658	68598	70128	90546	72829	104318	778410	28148.6	protease
COG0794	15284	10158	14677	12599	15979	19622	30614	30667	13167	16039	19904	198710	6827.52	Arabinose 5-phosphate isomerase
COG0795	40381	24782	27880	25944	61441	63971	54897	58508	48356	44560	60582	511302	14923.3	Permease yjgp yjgq family
COG0796	22962	13395	11802	12365	43026	40094	20783	20762	34207	25576	37242	282214	11364	Provides the (R)-glutamate required for cell wall biosynthesis (By similarity)
COG0797	11133	8980	11048	15253	10964	12502	20890	19787	11080	10877	15175	147689	3900.85	rare lipoprotein A
COG0798	7323	6414	14524	16878	7582	10837	16921	17207	6875	7895	8620	121076	4462.47	arsenical-resistance protein
COG0799	33118	16821	16567	14908	54327	52351	34347	34976	42556	36245	51148	387364	14392.3	Functions as a ribosomal silencing factor. Interacts with ribosomal protein L14 (rplN), blocking formation of intersubunit bridge B8. Prevents association of the 30S and 50S ribosomal subunits and the formation of functional ribosomes, thus repressing translation (By similarity)
COG0800	23368	11262	4002	7634	43418	38480	13741	10704	34022	25964	37632	250227	14043	Aldolase
COG0801	31964	20348	22358	24575	52653	53124	37159	38617	40819	35831	48899	406347	11561	2-Amino-4-hydroxy-6-hydroxymethyldihydropteridine pyrophosphokinase
COG0802	33105	16820	16501	14904	54312	52335	33883	34949	42527	36227	51132	386695	14398	protein family UPF0079, ATPase
COG0803	39970	16379	8338	8647	79899	70757	22937	22797	63027	44914	68109	445774	26476.3	periplasmic solute binding protein
COG0804	19039	9940	5122	8494	38762	31511	2290	2871	30748	21603	33305	203685	13484.6	Urea amidohydrolase subunit alpha
COG0805	33112	16816	16451	14955	54327	52325	33849	34090	42533	36214	51100	385772	14399	Part of the twin-arginine translocation (Tat) system that transports large folded proteins containing a characteristic twin-arginine motif in their signal peptide across membranes. Together with TatB, TatC is part of a receptor directly interacting with Tat signal peptides (By similarity)
COG0806	28689	14640	13156	13922	49436	42673	25222	24854	40521	31107	45723	329943	13140.3	An accessory protein needed during the final step in the assembly of 30S ribosomal subunit, possibly for assembly of the head region. Probably interacts with S19. Essential for efficient processing of 16S rRNA. May be needed both before and after RbfA during the maturation of 16S rRNA. It has affinity for free ribosomal 30S subunits but not for 70S ribosomes (By similarity)
COG0807	9450	7138	12055	17153	10305	7984	24237	22992	11324	10039	12991	145668	5784.19	Catalyzes the conversion of D-ribulose 5-phosphate to formate and 3,4-dihydroxy-2-butanone 4-phosphate (By similarity)
COG0809	26500	14319	13358	13687	46704	42707	26616	24701	37559	29358	42162	317671	12136.2	Transfers and isomerizes the ribose moiety from AdoMet to the 7-aminomethyl group of 7-deazaguanine (preQ1-tRNA) to give epoxyqueuosine (oQ-tRNA) (By similarity)
COG0810	16932	17028	33050	33510	17766	27315	72747	74058	16208	18227	20057	346898	21651.1	TonB family
COG0811	23105	22319	40155	44451	24113	32517	77501	82831	23569	25834	29774	426169	21736.9	MotA TolQ exbB proton channel
COG0812	33163	16824	16503	14905	54340	52351	33992	34939	42562	36266	51148	386993	14404.8	cell wall formation (By similarity)
COG0813	3502	3521	1668	2583	4016	3830	1634	2775	2670	3722	3676	33597	846.407	purine nucleoside phosphorylase DeoD-type
COG0814	360	7412	8434	7782	189	403	8196	10478	311	233	220	44018	4335.62	amino acid transport
COG0815	32483	16616	15226	14573	53659	51456	29572	32585	42103	35647	50354	374274	14432.6	Transfers the fatty acyl group on membrane lipoproteins (By similarity)
COG0816	33139	16967	15821	14365	54328	53102	31603	33139	42694	36369	51449	382976	14730.3	Could be a nuclease that resolves Holliday junction intermediates in genetic recombination (By similarity)
COG0817	26492	14285	13475	14089	46746	42646	26490	25655	37811	29430	42166	319285	12066.3	Nuclease that resolves Holliday junction intermediates in genetic recombination. Cleaves the cruciform structure in supercoiled DNA by nicking to strands with the same polarity at sites symmetrically opposed at the junction in the homologous arms and leaves a 5'-terminal phosphate and a 3'-terminal hydroxyl group (By similarity)
COG0818	22406	11999	6547	10484	42473	33165	5309	4942	34886	24319	37737	234267	14137.2	Diacylglycerol kinase
COG0819	687	2174	6801	7752	897	2209	6876	5563	1010	946	1018	35933	2846.53	Transcriptional activator, tena
COG0820	26681	14829	15382	15486	47080	43889	31814	31228	38215	29816	42574	336994	11730.8	rRNA (adenine-C2-)-methyltransferase activity
COG0821	32094	15109	16097	14687	53223	51076	32727	34304	41308	34990	49788	375403	14213.8	4-hydroxy-3-methylbut-2-en-1-yl diphosphate synthase activity
COG0822	16059	10639	20458	14484	17775	31213	44605	46179	11103	18312	20073	250900	12451.6	sUF system Fes assembly protein, NifU family
COG0823	22581	14872	34718	26430	24698	39134	86388	86513	20902	25006	29796	411038	25128.7	Involved in the TonB-independent uptake of proteins (By similarity)
COG0824	71894	41257	43403	52286	115174	111324	73574	78938	91101	77907	108560	865418	26189.5	Thioesterase
COG0825	32958	15778	13822	13279	54072	50089	26980	27514	42154	35917	50807	363370	15050.2	Component of the acetyl coenzyme A carboxylase (ACC) complex. First, biotin carboxylase catalyzes the carboxylation of biotin on its carrier protein (BCCP) and then the CO(2) group is transferred by the carboxyltransferase to acetyl-CoA to form malonyl-CoA (By similarity)
COG0826	6051	10959	14395	15875	5887	8932	26442	26910	6262	6721	7661	136095	7829.32	Peptidase U32
COG0827	2	202	11	76	7	11	95	20	3	0	1	428	62.9737	DNA Methylase
COG0828	1528	3719	7469	9484	1398	1632	8130	9369	1571	1590	1820	47710	3489.53	30S ribosomal protein S21
COG0829	19019	9934	5103	8486	38726	31502	2163	2817	30720	21561	33276	203307	13496	Required for maturation of urease via the functional incorporation of the urease nickel metallocenter (By similarity)
COG0830	19026	9940	5103	8506	38735	31506	2169	2832	30723	21562	33277	203379	13493.9	Required for maturation of urease via the functional incorporation of the urease nickel metallocenter (By similarity)
COG0831	21159	10267	5128	8565	41376	34711	2226	2879	31788	23680	35271	217050	14544.1	Urea amidohydrolase subunit gamma
COG0832	21225	10277	5135	8545	41420	34767	2184	2844	31844	23749	35354	217344	14581.8	Urea amidohydrolase subunit beta
COG0833	3218	7227	20186	22294	3747	4951	7039	9210	2615	3373	3362	87222	6913.16	permease
COG0834	85310	50486	48715	48871	110685	111842	103921	112054	90358	94805	120088	977135	27345.9	(ABC) transporter
COG0835	15464	18135	27746	28860	17117	22116	61812	63420	18097	17864	20466	311097	17501	chew protein
COG0836	28502	13936	11220	10392	48757	47913	32353	33599	38227	32250	45440	342589	14090.4	mannose-1-phosphate guanylyltransferase activity
COG0837	24888	8470	1915	4647	45076	34806	8242	7532	37035	26900	41419	240930	16180.5	glucokinase (EC 2.7.1.2)
COG0838	34103	14151	17804	13263	55916	55969	39199	39428	42492	37203	51709	401237	15602.3	NDH-1 shuttles electrons from NADH, via FMN and iron- sulfur (Fe-S) centers, to quinones in the respiratory chain
COG0839	34099	14151	17804	13263	55916	55969	39196	39428	42491	37201	51708	401226	15602.1	NADH dehydrogenase subunit j
COG0840	51291	77371	78162	91945	56065	63585	182031	182646	56969	57847	65986	963898	48315.3	Methyl-accepting chemotaxis
COG0841	38359	38781	63024	76047	38616	51228	122529	124099	38771	41457	49104	682015	32568.7	acriflavin resistance protein
COG0842	25347	16934	35290	29587	29871	48679	74848	67491	20212	27207	26784	402250	19041.4	(ABC) transporter
COG0843	37563	17919	19130	21211	58958	58875	42616	43824	45635	40751	55768	442250	15164.8	Cytochrome C oxidase subunit I
COG0845	79639	59710	77987	92571	119671	113286	155090	151689	103601	85577	117680	1156501	30151.5	Efflux transporter rnd family, mfp subunit
COG0846	5790	7726	16020	17337	6699	12102	32609	33165	6220	6629	7000	151297	10274.6	NAD-dependent protein deacetylase which modulates the activities of several enzymes which are inactive in their acetylated form
COG0847	39650	25780	27814	32938	61372	54773	37308	38177	49944	42830	59835	470421	12257.5	DNA polymerase iii
COG0848	24241	25003	46749	47276	25458	35389	86038	90536	25122	27197	31677	464686	24242.5	Biopolymer transport protein exbD tolR
COG0849	9115	7720	12096	12892	9870	7790	23795	22622	10193	9432	12614	138139	5553.98	This protein may be involved in anomalous filament growth. May be a component of the septum (By similarity)
COG0850	18371	10156	7667	9455	38083	32029	8467	7620	30064	20636	32300	214848	11710.6	Cell division inhibitor that blocks the formation of polar Z ring septums. Rapidly oscillates between the poles of the cell to destabilize FtsZ filaments that have formed before they mature into polar Z rings. Prevents FtsZ polymerization (By similarity)
COG0851	18370	9957	7658	9431	38083	32028	8457	7609	30063	20635	32300	214591	11731.5	Prevents the cell division inhibition by proteins MinC and MinD at internal division sites while permitting inhibition at polar sites. This ensures cell division at the proper site by restricting the formation of a division septum at the midpoint of the long axis of the cell (By similarity)
COG0852	31834	12203	13004	7549	52988	52137	38094	38316	41140	34821	49479	371565	16235.4	NDH-1 shuttles electrons from NADH, via FMN and iron- sulfur (Fe-S) centers, to quinones in the respiratory chain. The immediate electron acceptor for the enzyme in this species is believed to be ubiquinone. Couples the redox reaction to proton translocation (for every two electrons transferred, four hydrogen ions are translocated across the cytoplasmic membrane), and thus conserves the redox ene…
COG0853	4759	5112	10098	9827	5000	8165	15981	17773	4408	5107	5240	91470	4718.2	Catalyzes the pyruvoyl-dependent decarboxylation of aspartate to produce beta-alanine (By similarity)
COG0854	30774	15848	13624	12752	51304	47150	26053	27286	40709	33723	48805	348028	14107.1	Catalyzes the complicated ring closure reaction between the two acyclic compounds 1-deoxy-D-xylulose-5-phosphate (DXP) and 3-amino-2-oxopropyl phosphate (1-amino-acetone-3-phosphate or AAP) to form pyridoxine 5'-phosphate (PNP) and inorganic phosphate (By similarity)
COG0855	23742	13473	9052	10898	43748	40364	13002	12277	34948	26481	38390	266375	13246.6	Catalyzes the reversible transfer of the terminal phosphate of ATP to form a long-chain polyphosphate (polyP) (By similarity)
COG0856	0	6	8	14	2	4	26	9	2	2	2	75	7.57388	pyrE-like protein
COG0857	17715	6530	1121	911	37322	31247	3408	2318	29367	19938	31380	181257	14151.9	Involved in acetate metabolism (By similarity)
COG0858	33135	16831	16536	14913	54355	52383	34051	35017	42620	36290	51216	387347	14414.8	Associates with free 30S ribosomal subunits (but not with 30S subunits that are part of 70S ribosomes or polysomes). Essential for efficient processing of 16S rRNA. May interact with the 5'-terminal helix region of 16S rRNA (By similarity)
COG0859	42368	19786	36611	23554	45412	54656	101571	103114	38231	44567	57314	567184	27509.7	heptosyltransferase
COG0860	30849	19573	16617	15816	51472	47578	34715	35505	43225	33791	48849	377990	12835.5	n-acetylmuramoyl-l-alanine amidase
COG0861	39951	22956	29043	23300	62212	63478	42991	43588	47743	43299	60495	479056	14519.2	membrane protein terC
COG0863	17344	6946	13868	7521	19986	22226	43283	39146	17417	19128	24233	231098	11395.5	DNA methylase n-4 n-6 domain protein
COG0864	500	2211	7010	7891	650	1559	7973	8128	935	820	727	38404	3420.95	Transcriptional regulator
COG1001	591	1043	4376	2736	661	2841	12363	11677	754	844	751	38637	4380.76	adenine deaminase
COG1002	524	1772	486	1325	604	1505	1737	2085	838	597	639	12112	594.237	Type II restriction enzyme, methylase
COG1003	27331	14172	11214	9374	47945	50008	30720	32254	36184	30680	42704	332586	14012.2	The glycine cleavage system catalyzes the degradation of glycine. The P protein binds the alpha-amino group of glycine through its pyridoxal phosphate cofactor
COG1004	33759	17242	17695	17175	54893	53806	37751	37798	43352	37202	52054	402727	14268	UDP-glucose 6-dehydrogenase
COG1005	34099	14151	17804	13263	55916	55969	39196	39428	42491	37201	51708	401226	15602.1	NDH-1 shuttles electrons from NADH, via FMN and iron- sulfur (Fe-S) centers, to quinones in the respiratory chain. The immediate electron acceptor for the enzyme in this species is believed to be ubiquinone. Couples the redox reaction to proton translocation (for every two electrons transferred, four hydrogen ions are translocated across the cytoplasmic membrane), and thus conserves the redox ene…
COG1006	10381	5960	11346	12019	11090	12494	18190	18055	9797	10775	13946	134053	3540.33	Monovalent cation H antiporter subunit C
COG1007	34118	14161	17852	13283	55951	55997	39298	39663	42574	37254	51777	401928	15616.1	NDH-1 shuttles electrons from NADH, via FMN and iron- sulfur (Fe-S) centers, to quinones in the respiratory chain. The immediate electron acceptor for the enzyme in this species is believed to be ubiquinone. Couples the redox reaction to proton translocation (for every two electrons transferred, four hydrogen ions are translocated across the cytoplasmic membrane), and thus conserves the redox ene…
COG1008	53684	21541	19217	13872	94597	91188	43185	42408	73330	58985	85674	597681	29251.9	subunit m
COG1009	40960	19214	28570	26115	63062	65807	56795	56046	50141	44446	61311	512467	16103.4	subunit l
COG1010	20988	8174	3960	4371	41396	37384	10201	11008	32359	23749	35132	228722	14028.9	Precorrin-3B C17-methyltransferase
COG1011	38900	24620	37273	36406	43564	56790	81864	79552	33334	41898	47594	521795	18349.8	Hydrolase
COG1012	147447	92738	135853	174084	183650	208855	209353	216387	143826	158259	188754	1859206	37711.1	Dehydrogenase
COG1013	4658	4398	14521	10186	5574	12075	42880	41994	5273	5539	5359	152457	14522.1	Oxidoreductase required for the transfer of electrons from pyruvate to flavodoxin (By similarity)
COG1014	1672	1694	11226	7672	2025	5755	33934	32808	3220	2441	2220	104667	12169.6	oxidoreductase
COG1015	1359	2310	2305	2741	1338	1197	5108	6278	1275	1567	1705	27183	1689.71	Phosphotransfer between the C1 and C5 carbon atoms of pentose (By similarity)
COG1017	1765	3708	5352	6613	1798	1938	4194	1884	2019	2141	2157	33569	1680.4	Is involved in NO detoxification in an aerobic process, termed nitric oxide dioxygenase (NOD) reaction that utilizes O(2) and NAD(P)H to convert NO to nitrate, which protects the bacterium from various noxious nitrogen compounds. Therefore, plays a central role in the inducible response to nitrosative stress (By similarity)
COG1018	15017	17703	34514	48435	16047	17735	28884	26342	14636	16358	17400	253071	10670.4	Is involved in NO detoxification in an aerobic process, termed nitric oxide dioxygenase (NOD) reaction that utilizes O(2) and NAD(P)H to convert NO to nitrate, which protects the bacterium from various noxious nitrogen compounds. Therefore, plays a central role in the inducible response to nitrosative stress (By similarity)
COG1019	0	0	0	0	0	0	0	0	0	0	0	0	0	Reversibly transfers an adenylyl group from ATP to 4'- phosphopantetheine, yielding dephospho-CoA (dPCoA) and pyrophosphate (By similarity)
COG1020	14740	7506	18950	15261	16649	21871	41295	41248	14574	16943	18276	227313	10788.5	non-ribosomal peptide synthetase
COG1021	738	1054	561	115	809	278	197	533	895	865	1028	7073	331.099	2,3-dihydroxybenzoate-AMP ligase
COG1022	39770	20826	19938	14616	62234	64377	51683	58725	48346	43674	59027	483216	18071.1	Amp-dependent synthetase and ligase
COG1023	2382	986	2338	2075	2926	4747	6370	5732	1759	2472	2337	34124	1724.93	6-phosphogluconate dehydrogenase
COG1024	81994	57016	101019	128518	93866	128922	185144	185176	73049	88052	93204	1215960	42494.2	Enoyl-CoA hydratase
COG1025	932	1735	587	3706	959	417	613	1208	1021	1043	1179	13400	899.063	metalloendopeptidase activity
COG1026	865	1785	4748	5257	1074	848	1133	1060	1100	1103	1239	20212	1587.99	peptidase
COG1027	1468	4319	7224	7035	1322	1238	6965	7330	1529	1506	1662	41598	2794.03	Aspartate ammonia-lyase
COG1028	342715	175498	216532	245862	511419	552093	475311	449890	393884	375731	482738	4221673	126250	Dehydrogenase reductase
COG1029	44	0	2	6	26	76	159	307	28	65	32	745	91.397	formylmethanofuran dehydrogenase subunit B
COG1030	4303	1761	7177	5805	4881	6992	21070	20161	3718	4682	4577	85127	6541.09	Nodulation efficiency protein
COG1031	0	6	8	14	2	4	26	9	2	2	2	75	7.57388	metal cluster binding
COG1032	51274	24292	41905	29899	90275	94265	107595	104919	76051	58631	82156	761262	29625.3	radical SAM domain protein
COG1033	12102	6937	11334	7570	12957	20096	32354	35092	9465	13378	14307	175592	9489.97	RND superfamily
COG1034	14980	7177	15570	12082	16708	21865	33206	33617	13013	16081	19360	203659	8284.91	subunit g
COG1035	6999	2758	3134	891	8020	13794	7875	9927	3833	7851	8358	73440	3718.04	Coenzyme F420 hydrogenase
COG1036	43	0	0	1	26	75	153	287	28	64	32	709	86.1015	flavoprotein
COG1038	6174	2031	3980	3933	7148	7073	10322	11814	6487	6063	7608	72633	2791.32	Catalyzes a 2-step reaction, involving the ATP-dependent carboxylation of the covalently attached biotin in the first step and the transfer of the carboxyl group to pyruvate in the second (By similarity)
COG1039	48	218	56	93	98	62	208	155	104	66	59	1167	60.9876	Endonuclease that specifically degrades the RNA of RNA- DNA hybrids (By similarity)
COG1040	10831	8669	13273	14129	11157	14938	26332	25257	10169	11661	13433	159849	5866.23	Competence protein
COG1041	652	449	564	332	706	1640	2230	1077	1032	966	915	10563	553.889	RNA methylase
COG1042	10283	5410	11320	11127	12085	17533	30547	31878	9109	11434	11143	161869	8635.14	CoA-binding domain protein
COG1043	31243	17530	19010	17465	51612	48213	27313	30028	41334	34240	49365	367353	12788.9	Involved in the biosynthesis of lipid A, a phosphorylated glycolipid that anchors the lipopolysaccharide to the outer membrane of the cell (By similarity)
COG1044	32644	17670	15261	12878	52869	49487	29946	32470	42846	35790	50939	372800	14313.3	Catalyzes the N-acylation of UDP-3-O-acylglucosamine using 3-hydroxyacyl-ACP as the acyl donor. Is involved in the biosynthesis of lipid A, a phosphorylated glycolipid that anchors the lipopolysaccharide to the outer membrane of the cell (By similarity)
COG1045	38843	21366	18918	18785	60806	56424	41916	41252	49339	42236	59359	449244	15524.8	serine acetyltransferase
COG1047	4402	8750	16614	21845	4486	5176	21261	22526	5057	5010	5458	120585	7836.53	peptidylprolyl cistrans isomerase
COG1048	18070	12466	22188	24082	20284	25859	39322	39713	14892	19124	22283	258283	8815.46	aconitate hydratase
COG1049	19215	10136	5954	9503	38729	32074	4322	4015	30820	21534	33276	209578	12996.4	Aconitate hydratase 2
COG1051	45681	33924	53103	54085	52107	71240	97014	96513	43056	48654	53801	649178	20743.7	NUDiX hydrolase
COG1052	31226	20086	26912	29255	52731	52174	43318	39028	40838	35459	48309	419336	10649.3	Dehydrogenase
COG1053	41538	26973	31591	32184	64274	69457	64293	70466	50638	46174	61142	558730	16111.7	Succinate DeHydrogenase
COG1054	29421	13757	9441	10469	50042	43652	14365	15856	39008	32039	46975	305025	15548.7	UPF0176 protein
COG1055	8356	6326	7398	7921	9326	10376	20534	20106	8583	8634	10511	118071	4890.79	arsenical pump membrane protein
COG1056	4073	3791	7497	6960	4550	9471	7571	9638	1642	4737	5139	65069	2507.17	Nicotinamide-nucleotide adenylyltransferase
COG1057	33117	15276	11693	9621	54309	52345	32738	33178	42545	36225	51136	372183	16018.4	Catalyzes the reversible adenylation of nicotinate mononucleotide (NaMN) to nicotinic acid adenine dinucleotide (NaAD) (By similarity)
COG1058	32182	14775	11652	6228	53352	51978	32817	32833	41337	35129	49976	362259	16253.9	competence damage-inducible protein
COG1059	33	6	20	24	30	8	62	91	22	8	10	314	26.2197	Responsible for removing an oxidatively damaged form of guanine (7,8-dihydro-8-oxoguanine 7-oxoG) from DNA. Also nicks DNA at apurinic apyrimidinic sites (AP sites) (By similarity)
COG1060	4933	5291	9126	8488	5059	9110	25241	26539	5014	5300	5154	109255	8076.6	Catalyzes the radical-mediated transfer of the hydroxybenzyl group from 4-hydroxyphenylpyruvate (HPP) to 5-amino- 6-ribitylamino-2,4(1H,3H)-pyrimidinedione to form 7,8-didemethyl- 8-hydroxy-5-deazariboflavin (FO) (By similarity)
COG1061	10497	7453	12651	12335	11047	18004	31723	34499	9749	11264	11904	171126	9066.85	type iii restriction protein res subunit
COG1062	10901	8127	15699	21231	12258	16001	22269	23882	10519	11980	13018	165885	5259.84	alcohol dehydrogenase
COG1063	27343	18766	36538	39491	31489	49553	65881	65699	24801	31115	31867	422543	15702.5	Dehydrogenase
COG1064	15364	7663	17189	17830	17825	26458	37154	39146	13218	16788	19102	227737	9722.38	alcohol dehydrogenase
COG1066	24231	15521	13420	14057	43920	39311	26264	25377	36524	27128	39987	305740	10885	May play a role in the repair of endogenous alkylation damage (By similarity)
COG1067	1646	5358	11146	10240	1597	3070	16710	17214	1801	1818	2049	72649	6156.05	atp-dependent protease
COG1069	2362	1214	475	705	3085	3935	1224	1342	1750	2531	2353	20976	1052.7	ribulokinase
COG1070	33422	11369	6643	6694	56628	48505	20338	15826	46319	36697	52204	334645	18961.8	Carbohydrate kinase
COG1071	34856	15234	14898	17235	57195	49047	39204	29489	47084	37343	53279	394864	15248.5	Dehydrogenase
COG1072	5211	2773	1701	2809	6239	4944	2362	3504	5361	5009	6487	46400	1644.42	pantothenate kinase activity
COG1073	11291	4164	5925	5098	12787	16164	16268	19133	8933	12063	14404	126230	4956.47	Hydrolase
COG1074	26392	14388	12166	13456	46565	41253	22428	22681	37380	29223	41856	307788	12293.2	The heterodimer acts as both an ATP-dependent DNA helicase and an ATP-dependent, dual-direction single-stranded exonuclease. Recognizes the chi site generating a DNA molecule suitable for the initiation of homologous recombination. The AddA nuclease domain is required for chi fragment generation
COG1075	27113	17323	24349	27879	48733	42272	14955	17041	39024	29627	42850	331166	11609.7	Triacylglycerol Lipase
COG1076	8682	6779	8101	10451	9228	5126	8697	9251	9391	8764	11970	96440	1777.52	protein oligomerization
COG1077	33536	17447	17148	15326	54881	53971	37663	36979	43246	36902	51793	398892	14554.2	Rod shape-determining protein, MreB
COG1078	18734	8635	3739	2095	38195	32813	9862	9632	30499	21061	32710	207975	12965.5	Metal Dependent Phosphohydrolase
COG1079	10642	3842	4994	4410	12449	11715	14289	14336	11827	11826	14553	114883	4074.44	ABC transporter (permease)
COG1080	4381	3684	6399	6716	5155	8301	16836	17466	4238	4944	4933	83053	4924.18	General (non sugar-specific) component of the phosphoenolpyruvate-dependent sugar phosphotransferase system (sugar PTS). This major carbohydrate active-transport system catalyzes the phosphorylation of incoming sugar substrates concomitantly with their translocation across the cell membrane. Enzyme I transfers the phosphoryl group from phosphoenolpyruvate (PEP) to the phosphoryl carrier protein (…
COG1082	30942	9851	18705	16435	35784	45269	63849	52667	26256	33833	36460	370051	16028.8	Xylose isomerase domain protein TIM barrel
COG1083	24641	12072	6146	4293	44575	44084	16636	18642	33242	27495	40082	271908	14525.9	cytidylyltransferase
COG1084	0	6	8	14	2	4	26	9	2	2	2	75	7.57388	Involved in the biogenesis of the 60S ribosomal subunit (By similarity)
COG1085	2890	3240	4566	4957	3564	6409	12409	12767	2399	3194	2963	59358	3734.39	galactose-1-phosphate uridylyltransferase
COG1086	30086	16067	16060	13935	51040	45843	32287	35255	40697	33258	47779	362307	13112.3	polysaccharide biosynthesis protein
COG1087	32671	17837	20873	21171	54239	53980	34040	35356	41053	35758	49191	396169	12843.3	udp-glucose 4-epimerase
COG1088	12124	8776	15309	13689	12700	22504	32183	33228	8569	13371	14515	186968	8592.52	dTDP-glucose 4-6-dehydratase
COG1089	24422	10796	9033	5304	45469	45969	23804	24341	34325	27809	38803	290075	14036.4	GDP-mannose 4,6-dehydratase
COG1090	22710	13660	11703	12439	42871	39301	18381	20269	34064	25351	37075	277824	11339.6	Epimerase
COG1091	14341	10075	17002	15250	14817	25404	37111	37516	11061	15822	17213	215612	9597.51	Dtdp-4-dehydrorhamnose reductase
COG1092	5051	6217	8934	12013	5612	8667	26710	26777	6638	6553	6807	119979	8062.52	23S rRNA (guanine(2445)-N(2))-methyltransferase activity
COG1093	0	6	8	14	2	4	26	9	2	2	2	75	7.57388	translation initiation factor
COG1094	0	6	8	14	2	4	26	9	2	2	2	75	7.57388	Required for 40S ribosome biogenesis. Involved in nucleolar processing of pre-18S ribosomal RNA and ribosome assembly (By similarity)
COG1095	0	6	8	14	2	4	26	9	2	2	2	75	7.57388	DNA-directed RNA Polymerase
COG1096	0	0	0	0	0	0	0	0	0	0	0	0	0	Exosome complex
COG1097	0	6	8	14	2	4	26	9	2	2	2	75	7.57388	Exosome complex
COG1098	5	596	25	151	7	8	6	28	7	0	2	835	177.84	RNA binding s1 domain protein
COG1099	74	34	83	62	133	100	310	194	167	113	127	1397	76.2614	TatD-related deoxyribonuclease
COG1100	17906	6706	1538	1689	37323	31830	4191	3490	29537	20115	31773	186098	13945.9	GTP-binding Protein
COG1101	35	1145	588	205	39	135	290	271	68	46	40	2862	337.788	ABC transporter, (ATP-binding protein)
COG1102	108	330	2352	1504	204	1176	6646	7381	300	272	291	20564	2641.83	Cytidine monophosphate kinase
COG1103	0	0	0	0	0	0	0	0	0	0	0	0	0	Converts O-phospho-L-seryl-tRNA(Cys) (Sep-tRNA(Cys)) to L-cysteinyl-tRNA(Cys) (Cys-tRNA(Cys)) (By similarity)
COG1104	50444	23155	19448	21184	91163	82107	45724	42985	73606	55418	81343	586577	25932.1	cysteine desulfurase
COG1105	2731	2125	1890	3123	3438	5430	3807	4009	2188	3045	2777	34563	1016.87	1-phosphofructokinase
COG1106	495	287	277	239	527	1566	998	509	801	727	784	7210	387.991	Abortive infection protein
COG1107	1	1393	8	4	0	0	5	6	0	0	0	1417	419.292	phosphoesterase RecJ domain protein
COG1108	54287	23465	19877	16930	95892	88642	41260	42030	74405	60097	86525	603410	28696.7	ABC transporter
COG1109	70559	38561	43612	39083	113647	113430	83979	86707	89254	77546	107448	863826	28171.6	Catalyzes the conversion of glucosamine-6-phosphate to glucosamine-1-phosphate (By similarity)
COG1110	18	8	8	14	4	4	26	12	6	6	6	112	6.83839	Modifies the topological state of DNA by introducing positive supercoils in an ATP-dependent process. It cleaves transiently a single DNA strand and remains covalently bound to the 5' DNA end through a tyrosine residue. May be involved in rewinding the DNA strands in the regions of the chromosome that have opened up to allow transcription or replication (By similarity)
COG1111	291	16	231	206	232	149	745	559	312	319	216	3276	198.588	helicase
COG1112	1964	3007	2972	3218	1968	3177	8343	6499	2337	2352	2676	38513	2030.03	Helicase
COG1113	2413	11721	32074	39018	2970	4682	3622	4463	1589	2504	2329	107385	13130.2	amino acid
COG1114	893	3443	5080	5704	785	410	262	274	777	896	1003	19527	1991.74	branched-chain amino acid transport system II carrier protein
COG1115	23893	14833	9080	14022	43135	34323	10113	10982	35474	26402	39244	261501	12690.5	amino acid carrier protein
COG1116	27520	13272	24583	21509	30466	41646	52043	47372	24443	30939	35602	349395	11575.4	(ABC) transporter
COG1117	32780	16801	18694	17705	54110	53594	38937	39314	42704	36094	50868	401601	13904.9	Part of the ABC transporter complex PstSACB involved in phosphate import. Responsible for energy coupling to the transport system (By similarity)
COG1118	892	3716	5300	7283	763	2145	1086	1907	1540	1251	1376	27259	2097.98	(ABC) transporter
COG1119	19628	7667	1510	2872	39683	34428	3351	4351	30268	21574	32909	198241	14617.3	(ABC) transporter
COG1120	13739	9096	13387	18296	15599	19108	38505	37210	13717	14614	16790	210061	9660.88	(ABC) transporter
COG1121	46226	19443	13925	14309	86715	73763	25256	24603	69773	50999	77024	502036	27579.5	(ABC) transporter
COG1122	38575	17017	6812	4701	78354	70219	16094	17151	61753	43525	66450	420651	27398.3	ATPase activity
COG1123	41442	17752	14333	9736	64465	67099	38723	37949	48060	45256	59548	444363	19706.5	(ABC) transporter
COG1124	372	166	137	1202	341	286	513	680	341	397	362	4797	294.307	(ABC) transporter
COG1125	3071	1269	1383	3798	3501	5740	4707	4274	2638	3315	3141	36837	1321.37	(ABC) transporter
COG1126	39130	18656	15066	18403	61581	57513	29582	29569	47891	43154	58963	419508	17111	ABC transporter, (ATP-binding protein)
COG1127	30669	15672	17896	17953	51278	45683	40446	40730	42669	33287	48107	384390	12847.5	lipid transport
COG1129	28498	13317	16203	15367	34121	42100	41995	41160	25874	30989	34821	324445	10748.6	(ABC) transporter
COG1131	99410	48506	82449	64685	131705	172439	216044	209740	98734	108136	125512	1357360	55377.1	(ABC) transporter
COG1132	124154	62926	55926	56900	208582	204309	117617	118770	166040	137108	190039	1442371	56815.7	(ABC) transporter
COG1133	9824	4819	7776	6005	10943	11787	8990	10712	8001	10294	13573	102724	2557.84	transport protein
COG1134	7770	3681	6281	6164	8971	13581	19274	16923	6816	8553	8205	106219	4852.01	(ABC) transporter
COG1135	705	4795	12095	13765	597	2577	8239	7382	950	872	942	52919	4864.07	Part of the ABC transporter complex MetNIQ involved in methionine import. Responsible for energy coupling to the transport system (By similarity)
COG1136	74078	44052	56895	53332	118277	123856	120313	120546	96428	81929	110128	999834	30175.8	(ABC) transporter
COG1137	30769	17238	14055	13010	51267	47128	27525	29380	40730	33673	48750	353525	13741.9	(ABC) transporter
COG1138	12158	6846	7791	7100	13390	15367	22180	22658	10658	13026	16379	147553	5466.69	cytochrome c-type biogenesis protein
COG1139	3115	3310	6353	4607	3855	7719	18611	17601	2644	3461	3417	74693	5799.24	Iron-sulfur cluster binding protein
COG1140	531	1077	1506	3600	473	1485	4322	3951	863	605	411	18824	1498.52	nitrate reductase beta subunit
COG1141	24664	10127	4764	3923	45883	44181	12482	12777	34012	27067	38137	258017	15546.8	Ferredoxin
COG1142	17803	7470	1128	361	37321	31140	3048	1259	29374	19907	31375	180186	14281.3	4Fe-4S Ferredoxin iron-sulfur binding domain protein
COG1143	70480	29384	23608	17039	131624	121775	55986	54341	102708	78328	116170	801443	40875.1	NDH-1 shuttles electrons from NADH, via FMN and iron- sulfur (Fe-S) centers, to quinones in the respiratory chain. The immediate electron acceptor for the enzyme in this species is believed to be ubiquinone. Couples the redox reaction to proton translocation (for every two electrons transferred, four hydrogen ions are translocated across the cytoplasmic membrane), and thus conserves the redox ene…
COG1144	351	32	768	564	296	223	2837	1775	454	378	287	7965	838.61	oxidoreductase, delta subunit
COG1145	3	1	0	8	3	12	56	13	2	2	0	100	16.2201	4Fe-4S ferredoxin, iron-sulfur binding
COG1146	14147	8890	14069	13403	16112	19880	25182	28330	12603	15248	18438	186302	5694.42	metal cluster binding
COG1148	1288	2090	14812	9847	1770	7119	41929	44108	2366	2172	2543	130044	15997.3	CoB--CoM heterodisulfide reductase activity
COG1149	1309	1710	12139	7318	1703	5941	34955	35974	2052	2103	2265	107469	13128.3	cobyrinic Acid a,c-diamide synthase
COG1150	414	584	4076	2430	459	1916	11513	12321	627	579	705	35624	4439.87	heterodisulfide reductase, subunit
COG1151	540	1272	5295	3430	661	2566	15377	16074	1047	889	835	47986	5803.53	Catalyzes the reduction of hydroxylamine to form NH(3) and H(2)O (By similarity)
COG1152	0	0	0	0	0	0	0	2	0	0	0	2	0.603023	Part of a complex that catalyzes the reversible cleavage of acetyl-CoA, allowing autotrophic growth from CO(2) (By similarity)
COG1153	0	0	0	0	0	0	0	0	0	0	0	0	0	formylmethanofuran dehydrogenase, subunit
COG1154	32976	16596	14953	14140	54070	51262	29586	30899	42244	36057	50804	373587	14647.8	Catalyzes the acyloin condensation reaction between C atoms 2 and 3 of pyruvate and glyceraldehyde 3-phosphate to yield 1-deoxy-D-xylulose-5-phosphate (DXP) (By similarity)
COG1155	406	84	753	447	321	458	2227	1840	426	378	325	7665	684.508	Produces ATP from ADP in the presence of a proton gradient across the membrane. The V-type alpha chain is a catalytic subunit (By similarity)
COG1156	347	20	310	316	256	164	964	892	339	352	243	4203	287.42	Produces ATP from ADP in the presence of a proton gradient across the membrane. The V-type beta chain is a regulatory subunit (By similarity)
COG1157	7417	4387	6891	8276	8077	8406	20695	20221	7178	8290	9418	109256	5358.01	flagellum-specific ATP synthase
COG1158	16133	10703	17672	16665	17806	22579	37646	39059	14084	17199	20636	230182	9153.39	Facilitates transcription termination by a mechanism that involves Rho binding to the nascent RNA, activation of Rho's RNA-dependent ATPase activity, and release of the mRNA from the DNA template (By similarity)
COG1159	26558	14774	12409	13567	46995	43003	23487	22739	38036	29639	42342	313549	12524.6	An essential GTPase that binds both GDP and GTP, with rapid nucleotide exchange. Plays a role in 16S rRNA processing and 30S ribosomal subunit biogenesis and possibly also in cell cycle regulation and energy metabolism (By similarity)
COG1160	31205	15861	15872	15431	51424	46915	33447	32679	42605	33612	48803	367854	13313.9	GTPase that plays an essential role in the late steps of ribosome biogenesis (By similarity)
COG1161	17640	8419	1353	3145	37053	30856	2731	3821	29062	19686	31199	184965	13550.6	Required for a late step of 50S ribosomal subunit assembly. Has GTPase activity (By similarity)
COG1162	23300	13610	12730	12982	43506	39721	21721	22802	34598	26057	37921	288948	11157.4	May play a role in 30S ribosomal subunit biogenesis. Unusual circulary permuted GTPase that catalyzes rapid hydrolysis of GTP with a slow catalytic turnover (By similarity)
COG1163	0	6	8	14	2	4	26	9	2	2	2	75	7.57388	GTP-Binding protein
COG1164	6192	4635	6204	5070	6928	5712	18178	16940	7496	6581	9254	93190	4665.76	Oligoendopeptidase f
COG1165	21041	10772	4736	2723	41129	37271	10686	10170	32050	23363	34992	228933	13855.8	Catalyzes the thiamine diphosphate-dependent decarboxylation of 2-oxoglutarate and the subsequent addition of the resulting succinic semialdehyde-thiamine pyrophosphate anion to isochorismate to yield 2-succinyl-5-enolpyruvyl-6-hydroxy-3- cyclohexene-1-carboxylate (SEPHCHC) (By similarity)
COG1166	18853	8723	3471	5138	38560	32575	8201	9366	30735	21304	33184	210110	12881.5	Catalyzes the biosynthesis of agmatine from arginine (By similarity)
COG1167	15667	16254	33337	43921	18586	23674	33869	31864	14161	17141	17316	265790	9951.68	Transcriptional regulator, gntR family
COG1168	3904	3061	1684	4711	4548	5899	4984	5340	3338	4387	4071	45927	1169.88	Aminotransferase
COG1169	21105	11089	6573	3779	41305	38417	15584	16012	32297	23610	35252	245023	13009.5	isochorismate synthase
COG1171	37074	20069	19483	22960	58740	57960	34942	32673	45064	41591	55611	426167	14576.1	Threonine dehydratase
COG1172	26251	11727	13759	13511	31521	38073	36188	36494	24447	29026	32832	293829	9759.25	(ABC) transporter
COG1173	51093	23318	36965	24174	76426	86250	105112	91665	57277	56901	71110	680291	27090	Binding-protein-dependent transport systems inner membrane component
COG1174	6340	2186	2579	7195	7506	11130	7624	7251	5403	6897	6698	70809	2452.07	(ABC) transporter
COG1175	69507	26762	30128	25616	81161	102066	81305	78449	58386	75756	86800	715936	26393.2	binding-protein-dependent transport systems inner membrane Component
COG1176	17048	7946	10045	8451	18938	21425	27520	27787	15229	18783	21962	195134	6918.98	transporter activity
COG1177	17142	8109	10241	8980	19192	21986	28365	28246	15537	19019	22157	198974	7029.6	Binding-protein-dependent transport systems inner membrane component
COG1178	36343	16055	9359	9298	58430	51279	21934	22456	46514	39544	56170	367382	18422.8	ABC transporter (permease)
COG1179	1448	5441	8586	11185	1555	2331	11287	12676	1929	1712	1920	60070	4568.97	uba thif-type nad fad binding protein
COG1180	2562	3230	10888	7574	2775	6286	31288	30074	3641	3222	3441	104981	10756.8	activating enzyme
COG1181	37155	18844	21871	19951	59055	60428	49276	50788	46701	40850	56037	460956	15594.9	cell wall formation (By similarity)
COG1182	8162	5970	7843	9628	9261	11111	11228	12488	6358	8652	10830	101531	2076.98	Catalyzes the reductive cleavage of azo bond in aromatic azo compounds to the corresponding amines. Requires NADH, but not NADPH, as an electron donor for its activity (By similarity)
COG1183	13566	9023	14544	14312	14598	17887	31096	32526	12220	14496	18001	192269	7500.59	Cdp-diacylglycerol--serine o-phosphatidyltransferase
COG1184	290	254	1350	690	233	728	3535	4074	234	287	383	12058	1385.32	translation initiation factor
COG1185	33149	16824	16504	15818	54360	52412	34174	35299	42580	36296	51173	388589	14290.3	Involved in mRNA degradation. Hydrolyzes single-stranded polyribonucleotides processively in the 3'- to 5'-direction (By similarity)
COG1186	55644	25802	20620	21395	96970	89270	47324	48099	75780	61315	87620	629839	27724.2	Peptide chain release factor 2 directs the termination of translation in response to the peptide chain termination codons UGA and UAA (By similarity)
COG1187	34580	25683	26102	34415	54501	49700	35423	34245	45833	37273	52532	430287	10035.3	pseudouridine synthase activity
COG1188	3102	5942	6543	9911	3097	2762	7457	7285	3294	3376	3721	56490	2405.38	heat shock protein
COG1189	21205	8380	5325	5438	41727	38292	16418	14701	32674	23813	35560	243533	13335.6	hemolysin a
COG1190	22622	13306	13003	13111	42673	39495	22739	23443	33937	25196	36890	286415	10803.2	lysyl-trna synthetase
COG1191	12955	8505	10618	13144	13825	23466	26056	29509	12050	13759	14845	178732	6840.6	Sigma factors are initiation factors that promote the attachment of RNA polymerase to specific initiation sites and are then released (By similarity)
COG1192	46481	32625	44120	50592	69061	78433	81269	79835	56535	51951	66879	657781	16322.3	cobyrinic Acid a,c-diamide synthase
COG1193	18951	10579	5722	3167	38550	34158	15749	15300	30883	21336	33175	227570	12043.2	muts2 protein
COG1194	32833	16811	15856	14562	54085	52207	31701	32764	42247	35921	50933	379920	14494.2	a g-specific adenine glycosylase
COG1195	28718	14627	12719	13476	49538	42708	23477	23345	40616	31204	45804	326232	13425.1	it is required for DNA replication and normal SOS inducibility. RecF binds preferentially to single-stranded, linear DNA. It also seems to bind ATP (By similarity)
COG1196	57581	27566	43728	45415	81605	88171	99308	101827	67841	62858	82671	758571	24063.8	Required for chromosome condensation and partitioning (By similarity)
COG1197	29092	14871	13496	14165	49787	42917	26606	25587	40948	31526	46000	334995	13107.7	transcriptioN-repair coupling factor
COG1198	33504	16979	16514	14908	54611	53262	34039	35029	43064	36748	51692	390350	14613.5	Primosomal protein n'
COG1199	22819	12330	8607	10752	42573	37029	23338	23094	35449	25859	38571	280421	11782.8	helicase
COG1200	33113	16817	16476	14912	54271	52355	33905	34993	42500	36234	51122	386698	14394.6	ATP-dependent DNA helicase recG
COG1201	6757	2554	3641	5236	7085	9927	11452	11154	5842	7215	7889	78752	2859.54	purine NTP-dependent helicase activity
COG1202	8	0	0	0	0	0	0	0	0	0	0	8	2.41209	Dead deah box helicase domain protein
COG1203	2529	1411	7488	5467	2808	6569	23415	20415	3407	3275	3307	80091	7486.94	CRISPR-associated helicase, cas3
COG1204	130	57	155	1141	169	168	897	604	201	175	160	3857	362.834	helicase
COG1205	3888	2101	5399	4260	4993	8822	15217	14574	4416	4825	4684	73179	4375.3	DEAD DEAH box helicase
COG1206	20135	7940	2923	2623	39768	33472	9508	9337	31992	22792	35356	215846	13859.8	Catalyzes the folate-dependent formation of 5-methyl- uridine at position 54 (M-5-U54) in all tRNAs (By similarity)
COG1207	33743	17537	18494	16391	55020	53786	39368	41153	43505	37070	51888	407955	14317.3	Catalyzes the last two sequential reactions in the de novo biosynthetic pathway for UDP-N-acetylglucosamine (UDP- GlcNAc). The C-terminal domain catalyzes the transfer of acetyl group from acetyl coenzyme A to glucosamine-1-phosphate (GlcN-1-P) to produce N-acetylglucosamine-1-phosphate (GlcNAc-1-P), which is converted into UDP-GlcNAc by the transfer of uridine 5- monophosphate (from uridine 5-tr…
COG1208	64814	27181	26885	18796	107897	107744	65785	65482	82544	71134	99988	738250	31947.4	nucleotidyl transferase
COG1209	15696	10746	16972	14516	16535	24251	36563	38152	12777	16357	19448	222013	9179.81	Catalyzes the formation of dTDP-glucose, from dTTP and glucose 1-phosphate, as well as its pyrophosphorolysis (By similarity)
COG1210	11713	8536	12801	13446	13016	19309	24420	25690	8586	13114	14518	165149	5747.01	utp--glucose-1-phosphate uridylyltransferase
COG1211	22253	11964	13021	14286	42309	39439	25111	24910	33504	24684	36214	287695	10617.9	Catalyzes the formation of 4-diphosphocytidyl-2-C- methyl-D-erythritol from CTP and 2-C-methyl-D-erythritol 4- phosphate (MEP) (By similarity)
COG1212	31895	16303	14188	12262	52107	48258	27393	29136	40984	34520	50035	357081	14357.2	Activates KDO (a required 8-carbon sugar) for incorporation into bacterial lipopolysaccharide in Gram-negative bacteria (By similarity)
COG1213	403	941	1481	975	435	974	5455	4665	417	429	563	16738	1790.38	nucleotidyl transferase
COG1214	33119	16821	16503	14908	54327	52351	33996	34976	42557	36245	51148	386951	14403.2	Peptidase M22 Glycoprotease
COG1215	70779	34848	45511	44357	112562	120968	95246	93434	90142	78045	104426	890318	29032.5	Glycosyl transferase, family 2
COG1216	56903	28194	37108	28764	80499	109191	109183	107476	59139	63913	77122	757492	30788	Glycosyl transferase, family 2
COG1217	33122	16810	15213	14241	54327	52144	30026	32079	42557	36246	51149	377914	14739.3	gtp-binding protein typa
COG1218	33839	16781	11453	13280	54827	47299	19181	21428	44668	36600	53491	352847	16377.7	3'(2'),5'bisphosphate nucleotidase
COG1219	33381	17226	18823	16093	54753	53866	40455	41763	43115	36704	51650	407829	14345.4	ATP-dependent specificity component of the Clp protease. It directs the protease to specific substrates. Can perform chaperone functions in the absence of ClpP (By similarity)
COG1220	9159	5478	10029	8357	10120	14013	28893	30472	7613	9777	12042	145953	8416.82	this subunit has chaperone activity. The binding of ATP and its subsequent hydrolysis by HslU are essential for unfolding of protein substrates subsequently hydrolyzed by HslV. HslU recognizes the N-terminal part of its protein substrates and unfolds these before they are guided to HslV for hydrolysis (By similarity)
COG1221	349	1885	1090	856	260	921	304	481	519	468	552	7685	475.347	transcriptional
COG1222	2333	692	1035	1043	2846	4427	2348	2094	1607	2371	2225	23021	1032.12	26S protease regulatory subunit
COG1223	56	9	0	20	18	16	67	22	8	7	7	230	21.2671	ATPase family, AAA
COG1224	0	6	8	14	2	4	26	9	2	2	2	75	7.57388	ruvB-like
COG1225	93318	44341	53438	37831	156263	162069	137885	141466	124097	104672	144553	1199933	45856.2	alkyl hydroperoxide reductase Thiol specific antioxidant Mal allergen
COG1226	1776	1625	543	2286	1382	2115	410	725	1166	1585	2243	15856	666.292	PotAssium voltage-gated channel
COG1227	430	1822	1112	1338	418	317	2196	1851	428	524	440	10876	703.787	Manganese-dependent inorganic pyrophosphatase
COG1228	18204	11355	14438	21377	20149	27065	53469	45360	16808	19724	20710	268659	13113.2	amidohydrolase
COG1229	169	64	408	106	121	377	1290	1417	150	178	147	4427	483.037	formylmethanofuran dehydrogenase, subunit a
COG1230	7940	14423	31150	41873	8538	12990	30387	30886	8484	9005	9111	204787	12398.6	cation diffusion facilitator family transporter
COG1231	9918	4030	2552	3866	9132	15685	6595	8242	7603	9842	11799	89264	3826.5	L-amino-acid oxidase activity
COG1232	3766	2428	7792	6212	4858	9839	23701	23098	4390	4710	4554	95348	7554.88	protoporphyrinogen oxidase
COG1233	76614	28848	19453	12721	139028	132796	54938	53234	108403	84912	122421	833368	45683	phytoene
COG1234	30510	12874	13234	10286	51602	48385	38484	36872	41540	34004	47144	364935	14897.4	Zinc phosphodiesterase, which displays some tRNA 3'- processing endonuclease activity. Probably involved in tRNA maturation, by removing a 3'-trailer from precursor tRNA (By similarity)
COG1235	13860	7116	12121	9618	15141	19965	37948	38083	12814	15306	18664	200636	10429.1	domain protein
COG1236	6341	4446	7569	9767	5868	9240	22775	22411	6427	6780	7722	109346	6429.38	cleavage and polyadenylation
COG1237	475	652	3835	3181	545	1969	11054	12096	666	641	756	35870	4273.31	beta-lactamase domain protein
COG1238	12790	7586	11074	14377	14014	15260	19858	20871	11194	13892	17145	158061	3881.99	Membrane
COG1239	41324	15342	7318	6049	81781	73047	19015	19442	63410	46159	69329	442216	28243.6	magnesium chelatase
COG1240	8332	6416	9207	6485	9027	12406	27519	27299	8456	9328	9544	134019	7694.9	magnesium chelatase
COG1241	0	10	8	20	4	9	26	18	4	3	4	106	8.24952	dna replication licensing factor
COG1242	475	1985	3121	1759	513	1313	7570	7810	739	624	569	26478	2735.2	radical SAM protein
COG1243	291	16	626	545	231	152	2058	1695	312	314	212	6452	664.469	Histone acetyltransferase
COG1244	30	13	394	209	68	8	1291	1763	61	37	30	3904	599.996	radical SAM domain protein
COG1245	291	598	231	221	240	162	809	556	316	318	215	3957	203.89	ATP-binding cassette, sub-family E
COG1246	28816	17871	15803	17574	49421	52916	30265	31827	38599	32759	44851	360702	12753.9	n-acetylglutamate synthase
COG1247	15234	7341	8543	9356	17056	22366	24301	22976	13508	16495	17624	174800	5860.79	N-acetyltransferase
COG1249	76698	44447	47945	58611	119802	114101	85599	89445	99043	84306	114665	934662	26341.6	dihydrolipoyl dehydrogenase
COG1250	29926	23306	40837	47241	33165	41770	68494	69645	28117	32794	37557	452852	15355.7	Dehydrogenase
COG1251	11874	13394	35192	43081	13825	19931	37605	42263	11683	13270	13157	255275	13285.6	nitrite reductase
COG1252	52319	23167	17031	18079	93035	84610	35826	33850	73720	56950	83346	571933	28323.2	Nadh dehydrogenase
COG1253	54332	27636	22711	22486	95919	88271	50882	49380	77189	59681	85642	634129	26561.1	CBS Domain protein
COG1254	5754	3856	6837	5946	6065	10017	19440	18764	4979	6216	6819	94693	5403.43	Acylphosphatase (EC 3.6.1.7)
COG1255	0	0	0	0	0	0	0	0	0	0	0	0	0	UPF0146 protein
COG1256	6730	4213	6934	7928	7293	8158	20546	20274	6323	7469	8434	104302	5520.84	ciliary or bacterial-type flagellar motility
COG1257	1499	2884	2313	2865	1469	2252	5340	5897	1655	1722	1879	29775	1525.84	)-reductase
COG1258	3	6	8	14	2	4	29	9	3	3	2	83	8.01703	Responsible for synthesis of pseudouridine from uracil- 54 and uracil-55 in the psi GC loop of transfer RNAs (By similarity)
COG1259	5779	3641	6714	4256	5949	10909	18681	17857	4998	6151	6741	91676	5256.48	nuclease activity
COG1260	2659	1033	4357	3005	3303	5956	12154	11474	2096	2858	2775	51670	3734.45	synthase
COG1261	4436	3441	5395	6628	4472	4514	16269	16214	4810	5127	6219	77525	4628.47	basal body p-ring
COG1262	22109	16861	30147	26850	22445	39645	62998	61617	21148	25359	27911	357090	15877.6	Sulphatase-modifying factor protein
COG1263	288	5479	2133	2228	161	151	205	541	324	145	156	11811	1657.35	PTS System
COG1264	121	681	80	92	61	77	98	265	85	62	59	1681	184.501	pts system
COG1266	20141	9257	4578	2590	40319	37519	11821	12264	30944	22472	34022	225927	13498.9	caax amino terminal protease family protein
COG1267	9660	7735	13220	12982	10252	14804	23795	26444	7418	10951	12528	149789	6151.37	phosphatidylglycerophosphatase a
COG1268	29901	11132	6047	2872	51245	47838	15632	16338	39014	32776	47358	300153	17713.3	bioY protein
COG1269	368	288	346	1427	265	201	1103	1021	352	362	252	5985	424.989	ATPase 116 kDa subunit
COG1270	21607	9819	6391	6978	41940	38281	17466	16266	32841	24350	35665	251604	12788	Converts cobyric acid to cobinamide by the addition of aminopropanol on the F carboxylic group (By similarity)
COG1271	5489	10441	17769	22325	6115	11419	26277	24108	5452	6189	6161	141745	8198.92	(Ubiquinol oxidase) subunit I
COG1272	4444	4871	8591	9415	5080	7035	10007	11124	4065	4969	5022	74623	2555.47	Channel protein (Hemolysin III family
COG1273	2648	1210	1165	2442	3253	4924	4625	3734	2005	2853	2634	31493	1220.28	Could be involved in DNA repair (By similarity)
COG1274	267	2414	6221	7331	590	2037	4981	4928	1361	555	466	31151	2570.93	Catalyzes the conversion of oxaloacetate (OAA) to phosphoenolpyruvate (PEP), the rate-limiting step in the metabolic pathway that produces glucose from lactate and other precursors derived from the citric acid cycle (By similarity)
COG1275	402	4228	6643	6867	362	1345	2906	2984	828	472	349	27386	2479.13	C4-dicarboxylate transporter malic acid transport protein
COG1276	2647	3793	6575	9151	3237	5184	7911	6235	1617	2886	2588	51824	2462.93	copper resistance
COG1277	7853	3079	6937	5027	9005	14057	20275	18510	6552	8588	8718	108601	5453.58	(ABC) transporter
COG1278	35763	25260	38848	46134	39178	49292	70085	74465	30677	37938	43631	491271	15229.9	Cold shock protein
COG1279	13453	7583	9039	9682	15107	15915	10696	13960	11089	14250	17396	138170	3127.82	Lysine exporter protein (Lyse ygga)
COG1280	49766	46025	73495	84979	54654	52271	63652	68520	45639	53105	66328	658434	12545.7	Lysine exporter protein (Lyse ygga)
COG1281	21288	11573	8667	11120	40932	34335	12684	12547	33263	24026	36719	247154	11988.7	Redox regulated molecular chaperone. Protects both thermally unfolding and oxidatively damaged proteins from irreversible aggregation. Plays an important role in the bacterial defense system toward oxidative stress (By similarity)
COG1282	31894	14901	13242	12623	53050	50040	23524	24822	41203	34822	49622	349743	15213	The transhydrogenation between NADH and NADP is coupled to respiration and ATP hydrolysis and functions as a proton pump across the membrane (By similarity)
COG1283	2091	3785	3931	3667	2117	2483	10325	10882	2272	2443	2398	46394	3232.28	Na Pi-cotransporter
COG1284	2042	2941	2412	3874	2108	2079	5375	6000	2435	2319	2626	34211	1382.21	membrane
COG1285	2267	3160	9383	11902	2278	4887	15969	14760	2979	2860	2962	73407	5317.12	mgtC SapB transporter
COG1286	10785	9469	14786	12667	11453	16926	29883	30330	8797	12228	13968	171292	7551.67	Colicin v production protein
COG1287	2669	751	827	1472	3740	5207	4600	2483	2120	3048	2961	29878	1426.96	oligosaccharyl transferase STT3 subunit
COG1288	1034	1095	1774	2691	861	1086	4893	6141	853	997	1157	22582	1814.72	c4-dicarboxylate anaerobic carrier
COG1289	3765	7385	12145	18555	4191	6223	10938	10226	2905	3870	3742	83945	4876.55	Fusaric acid resistance protein
COG1290	52516	21136	11807	10173	93660	87455	31920	32885	72849	57863	83936	556200	30895.5	Component of the ubiquinol-cytochrome c reductase complex (complex III or cytochrome b-c1 complex), which is a respiratory chain that generates an electrochemical potential coupled to ATP synthesis (By similarity)
COG1291	12318	5332	7913	10919	13645	10785	25986	24125	12575	12800	15891	152289	6228.4	MotA TolQ exbB proton channel
COG1292	8689	11284	19226	35592	8599	11345	15060	19065	7552	9015	9714	155141	8226.69	Transporter
COG1293	17787	7321	4994	2734	37509	33244	13429	13707	29646	20154	31845	212370	12172.8	Fibronectin-binding A domain protein
COG1294	5629	10050	14474	19169	6234	9282	16729	15463	5300	6240	6372	114942	5100.85	oxidoreductase activity, acting on diphenols and related substances as donors, oxygen as acceptor
COG1295	29363	15863	16920	21540	50332	50298	35053	36784	39283	32237	43730	371403	12098.5	ribonuclease BN
COG1296	16314	11740	18740	17645	18177	27384	25524	28657	10930	18434	20495	214040	5779.15	AzlC Family
COG1297	442	370	1557	945	456	1014	5616	5125	560	510	633	17228	1915.28	oligo-peptide transporter
COG1298	6677	4190	6827	7864	7236	8035	20131	19948	6272	7402	8372	102954	5397.35	Flagellar biosynthesis protein flha
COG1299	246	3200	1808	2493	159	267	446	1610	480	221	182	11112	1084.4	pts system
COG1300	1725	2855	2002	2531	1730	3077	5503	6099	2370	2133	2390	32415	1477.83	stage II sporulation protein m
COG1301	7712	16449	19960	25388	7276	10024	22860	21246	7561	7922	9657	156055	7068.59	sodium dicarboxylate symporter
COG1302	2365	1176	1060	1029	3064	4994	2794	2355	1636	2505	2346	25324	1139.91	alkaline shock protein
COG1303	0	6	8	14	2	4	26	9	2	2	2	75	7.57388	Specifically catalyzes the AdoMet-dependent 2'-O-ribose methylation of cytidine at position 56 in tRNAs (By similarity)
COG1304	36356	16023	16322	14874	59021	56174	35534	33361	45749	40208	55475	409097	16289	Catalyzes the 1,3-allylic rearrangement of the homoallylic substrate isopentenyl (IPP) to its allylic isomer, dimethylallyl diphosphate (DMAPP) (By similarity)
COG1305	18907	11596	23689	22528	20199	35922	60331	59772	16159	21306	22609	313018	16704.7	transglutaminase domain-containing protein
COG1306	2255	614	1451	814	2911	4016	4430	3263	1330	2371	2218	25673	1244.82	GTP-Binding protein
COG1307	3077	2022	6548	4317	4145	7111	18947	15073	2908	3606	3504	71258	5487.52	degv family
COG1308	0	6	8	14	2	4	26	9	2	2	2	75	7.57388	nascent polypeptide-associated complex
COG1309	137072	103832	191665	227761	159508	228731	266472	272247	118053	146028	149798	2001167	58911.9	Transcriptional regulator
COG1310	3047	1074	2975	3202	3654	6556	10091	7699	2732	3400	3198	47628	2645.89	Component of the eukaryotic translation initiation factor 3 (eIF-3) complex, which is involved in protein synthesis and, together with other initiation factors, stimulates binding of mRNA and methionyl-tRNAi to the 40S ribosome (By similarity)
COG1311	0	6	8	14	2	4	26	9	2	2	2	75	7.57388	DNA-directed DNA polymerase activity
COG1312	198	61	135	137	202	133	514	439	206	155	147	2327	138.251	Catalyzes the dehydration of D-mannonate (By similarity)
COG1313	369	620	3834	2151	580	2364	10855	11251	630	656	738	34048	4076.42	radical SAM domain protein
COG1314	13506	10114	14093	13464	14496	20579	27595	30040	10791	15054	16737	186469	6514.11	Preprotein translocase, subunit SecG
COG1315	430	2210	3684	3930	464	1920	8635	10258	617	598	707	33453	3424.6	PALM domain HD hydrolase domain and
COG1316	12412	4937	5452	5886	14238	23332	12253	13105	9270	12844	13223	126952	5218.86	transcriptional
COG1317	2998	3367	6954	7014	3359	4783	20637	19464	3880	3531	4002	79989	6470.33	Flagellar assembly protein
COG1318	0	6	8	16	2	4	26	9	2	2	2	77	7.7846	NA
COG1319	14792	6241	14924	13113	17677	25192	42488	43512	13403	16375	16799	224516	12023.1	Dehydrogenase
COG1320	8684	5294	11256	11987	9832	9505	17934	17812	8633	9145	11729	121811	3828.32	monovalent cation h antiporter subunit g
COG1321	10197	5497	7729	5694	11615	11177	20711	19460	10635	10707	13453	126875	4890.44	cellular manganese ion homeostasis
COG1322	15705	7143	10230	8870	17210	20968	28952	31005	13403	16589	19953	190028	7658.59	Dna recombination protein
COG1323	2	202	11	77	2	4	3	20	3	0	2	326	61.3503	UPF0348 protein
COG1324	18616	8125	5037	5109	38338	34480	15655	15165	30578	20996	32555	224654	12022.1	tolerance protein
COG1325	0	6	8	14	2	4	26	9	2	2	2	75	7.57388	exosome subunit
COG1326	0	6	8	14	2	4	26	9	2	2	2	75	7.57388	Zn-finger protein-like protein
COG1327	32009	15044	14665	14044	53373	51073	28804	29250	41492	35147	49835	364736	14670.1	Negatively regulates transcription of bacterial ribonucleotide reductase nrd genes and operons by binding to NrdR- boxes (By similarity)
COG1328	1421	3766	4182	3604	1684	2652	10970	11226	2200	1836	1857	45398	3566.66	Anaerobic ribonucleoside-triphosphate reductase
COG1329	12958	4951	6823	4283	14763	18524	19653	21024	10745	13803	16947	144474	5850.73	Transcriptional regulator (CarD family
COG1330	18095	9908	6516	9195	37746	30374	4024	5960	29806	20183	31791	203598	12205.3	exodeoxyribonuclease V, gamma
COG1331	6204	5678	11002	7013	6710	11728	30067	31181	6543	6921	7168	130215	9489.19	mannose-6-phosphate isomerase activity
COG1332	602	324	1832	964	644	1389	5385	4943	709	742	708	18242	1784.13	CRISPR-associated RAMP protein, Csm5 family
COG1333	20149	7897	4030	3286	40261	36417	10137	11478	31403	22524	33797	221379	13628.7	Cytochrome c biogenesis protein
COG1334	984	1940	1237	3549	993	545	3151	3161	1115	1112	1242	19029	1056.65	flagellar protein FlaG
COG1335	35995	23104	30788	36132	58949	54750	57044	51261	48110	40003	53682	489818	11927.4	isochorismatase
COG1336	349	228	292	108	445	1475	1240	428	658	612	642	6477	420.838	Crispr-associated ramp protein, Cmr4 family
COG1337	1652	1373	5604	2985	1918	6306	16099	16182	2507	2478	2638	59742	5516.6	Crispr-associated ramp protein
COG1338	6684	4181	6830	7858	7240	8037	20129	19937	6274	7404	8372	102946	5394.95	Flagellar biosynthetic protein FliP
COG1339	0	6	8	14	2	4	26	9	2	2	2	75	7.57388	Catalyzes the CTP-dependent phosphorylation of riboflavin (vitamin B2) to form flavin mononucleotide (FMN) (By similarity)
COG1340	3	35	9	14	6	50	64	265	18	40	30	534	74.3429	phosphoserine phosphatase
COG1341	287	248	1340	678	230	722	3507	4044	229	280	378	11943	1375.98	Nucleolar protein 9
COG1342	320	1137	2335	1174	258	748	5200	5642	346	311	427	17898	1974.87	UPF0251 protein
COG1343	2030	1358	6950	3820	2332	6048	20341	19663	2897	2783	2799	71021	6904.31	CRISPR (clustered regularly interspaced short palindromic repeat), is an adaptive immune system that provides protection against mobile genetic elements (viruses, transposable elements and conjugative plasmids). CRISPR clusters contain sequences complementary to antecedent mobile elements and target invading nucleic acids. CRISPR clusters are transcribed and processed into CRISPR RNA (crRNA). Fun…
COG1344	19167	14669	18258	24513	20637	20043	50919	49884	20217	20227	24784	283318	12491.9	Flagellin
COG1345	4507	3507	6678	8878	5153	6831	19780	19529	4151	4909	5086	89009	5906.21	flagellar hook-associated
COG1346	912	5978	10379	14123	976	695	2236	2636	948	1152	1200	41235	4541.21	cytolysis
COG1347	2598	4148	1600	3446	2391	1782	3561	3781	2575	2858	2911	31651	803.79	NQR complex catalyzes the reduction of ubiquinone-1 to ubiquinol by two successive reactions, coupled with the transport of Na( ) ions from the cytoplasm to the periplasm. NqrA to NqrE are probably involved in the second step, the conversion of ubisemiquinone to ubiquinol (By similarity)
COG1348	18058	7065	3581	1946	37998	33252	11705	10117	30200	20553	32124	206599	12913.8	The key enzymatic reactions in nitrogen fixation are catalyzed by the nitrogenase complex, which has 2 components the iron protein and the molybdenum-iron protein (By similarity)
COG1349	11396	7935	6216	10698	13261	13484	13493	14362	11036	12073	13545	127499	2551.85	transcriptional regulator DeoR family
COG1350	3036	1043	5405	3399	3716	3054	15175	15867	4153	2904	4717	62469	4994.19	The beta subunit is responsible for the synthesis of L- tryptophan from indole and L-serine (By similarity)
COG1351	30205	10735	8042	3662	51455	48723	22035	22073	39084	33076	47518	316608	16931.4	Catalyzes the formation of dTMP and tetrahydrofolate from dUMP and methylenetetrahydrofolate (By similarity)
COG1352	11076	9249	17534	16560	12642	17317	49480	50099	12682	12522	14599	223760	14788	catalyzes the demethylation of specific methylglutamate residues introduced into the chemoreceptors (methyl-accepting chemotaxis proteins) by CheR (By similarity)
COG1353	1049	563	2647	1590	1158	2933	8273	7515	1538	1446	1440	30152	2639.96	crispr-associated protein
COG1354	32090	14306	15484	14642	53419	51612	32362	32780	41511	35158	49951	373315	14535	Participates in chromosomal partition during cell division. May act via the formation of a condensin-like complex containing Smc and ScpB that pull DNA away from mid-cell into both cell halves (By similarity)
COG1355	1805	1125	5591	3103	1953	3693	15767	16410	2193	2242	2482	56364	5549.21	UPF0103 protein
COG1356	0	0	0	0	0	0	0	0	0	0	0	0	0	Transcriptional regulator
COG1357	96064	37987	13151	8704	173677	173145	35833	38440	144440	109339	161151	991931	65699.5	pathogenesis
COG1358	4	406	30	100	6	11	31	34	8	2	5	637	118.841	(ribosomal) protein
COG1359	9893	7433	10402	12040	9997	14951	23518	17733	8713	10276	11599	136555	4670.71	Antibiotic biosynthesis monooxygenase
COG1360	17242	9273	12360	14299	18234	15577	36384	35675	17904	18320	21890	217158	8720.22	Ompa motb domain protein
COG1361	0	6	8	14	2	4	26	14	2	2	2	80	7.86245	S-layer domain-like protein
COG1362	931	273	183	1591	933	405	662	1478	1001	1049	1201	9707	462.83	M18 family aminopeptidase
COG1363	3634	2892	2054	2708	4383	5652	6366	4517	3027	3951	3912	43096	1282.24	Peptidase m42 family protein
COG1364	27452	12724	13101	11740	48460	49832	25684	26742	36303	30779	42880	325697	13754.4	Catalyzes two activities which are involved in the cyclic version of arginine biosynthesis the synthesis of N- acetylglutamate from glutamate and acetyl-CoA as the acetyl donor, and of ornithine by transacetylation between N(2)-acetylornithine and glutamate (By similarity)
COG1365	0	0	0	0	0	0	0	0	0	0	0	0	0	Queuosine synthesis-like protein
COG1366	39918	24005	38576	27604	65180	86051	93887	92732	51030	47654	59873	626510	25027.1	stage II sporulation protein
COG1367	35	72	215	106	208	576	848	385	193	169	128	2935	246.033	Crispr-associated ramp protein, Cmr1 family
COG1368	2178	5935	5447	6904	1929	4383	13484	15273	2631	2495	2524	63183	4603.45	Sulfatase
COG1369	0	0	0	0	0	0	0	0	0	0	0	0	0	Part of ribonuclease P, a protein complex that generates mature tRNA molecules by cleaving their 5'-ends (By similarity)
COG1370	0	0	0	0	0	0	0	0	0	0	0	0	0	Exchanges the guanine residue with 7-cyano-7- deazaguanine (preQ0) at position 15 in the dihydrouridine loop (D- loop) of archaeal tRNAs (By similarity)
COG1371	631	266	2052	1250	496	883	5998	5985	580	633	599	19373	2145.71	Chaperone or modulator of proteins involved in DNA or RNA processing (By similarity)
COG1372	18	11	33	5	31	28	55	41	64	46	68	400	20.7378	Provides the precursors necessary for DNA synthesis. Catalyzes the biosynthesis of deoxyribonucleotides from the corresponding ribonucleotides (By similarity)
COG1373	4100	5995	23978	17603	3774	11185	52320	59890	5080	4995	5630	194550	20106.4	ATPase (AAA
COG1374	0	0	0	0	0	0	0	0	0	0	0	0	0	pre-rRNA processing and 60S ribosome subunit assembly (By similarity)
COG1376	15440	11035	20922	22612	16474	28305	35890	33127	12059	17046	17758	230668	8255.42	ErfK ybiS ycfS ynhG family protein
COG1377	10504	4831	7154	8335	11747	9957	21978	21240	10717	10784	13637	130884	5342.43	flagellar biosynthetic protein flhB
COG1378	321	289	1370	741	296	751	3635	4129	298	347	428	12605	1395.5	Transcriptional regulator
COG1379	4	195	461	340	4	9	1661	1145	4	2	0	3825	557.33	Uvrd rep helicase
COG1380	910	4460	5762	8938	948	669	1624	1896	908	1119	1166	28400	2673.93	lrga family
COG1381	33073	16805	16467	14856	54249	52332	33830	34823	42493	36207	51116	386251	14399.8	Involved in DNA repair and RecF pathway recombination (By similarity)
COG1382	0	6	8	14	2	4	26	9	2	2	2	75	7.57388	Molecular chaperone capable of stabilizing a range of proteins. Seems to fulfill an ATP-independent, HSP70-like function in archaeal de novo protein folding (By similarity)
COG1383	0	6	8	14	2	4	26	9	2	2	2	75	7.57388	Ribosomal protein
COG1384	10500	3716	3525	1835	11658	12862	11300	11729	8635	11055	14265	101080	4217.63	lysyl-tRNA synthetase
COG1385	35406	19121	21212	21555	56344	54727	34947	35947	44339	38495	54095	416188	13581	Specifically methylates the N3 position of the uracil ring of uridine 1498 (m3U1498) in 16S rRNA. Acts on the fully assembled 30S ribosomal subunit (By similarity)
COG1386	32248	14411	15487	14660	53585	51773	32437	32848	41594	35428	50140	374611	14584.1	Participates in chromosomal partition during cell division. May act via the formation of a condensin-like complex containing Smc and ScpA that pull DNA away from mid-cell into both cell halves (By similarity)
COG1387	3116	3149	6723	4204	3595	6846	17098	17203	2630	3323	3211	71098	5470.88	histidinol phosphate phosphatase, hisj family
COG1388	1840	2891	5252	4165	2660	5401	16226	15356	2821	2748	2903	62263	5133.44	domain protein
COG1389	0	6	8	14	2	4	26	9	2	2	2	75	7.57388	DNA topoisomerase VI subunit B
COG1390	1	6	8	14	2	4	26	14	3	2	2	82	7.71186	Produces ATP from ADP in the presence of a proton gradient across the membrane (By similarity)
COG1391	8678	5434	8471	11377	9787	7242	12148	12479	8863	8939	11661	105079	2195.84	Adenylation and deadenylation of glutamate--ammonia ligase (By similarity)
COG1392	5640	3018	6357	5868	6694	6167	18585	18408	5688	5402	7150	88977	5251.66	Phosphate transport regulator
COG1393	27174	20068	16916	22021	46773	40196	24926	25481	39276	30275	43578	336684	10194.9	arsenate reductase (glutaredoxin) activity
COG1394	309	20	310	316	240	164	962	885	327	327	240	4100	287.798	Produces ATP from ADP in the presence of a proton gradient across the membrane (By similarity)
COG1395	118	269	253	530	145	292	249	850	499	190	177	3572	218.744	sequence-specific DNA binding
COG1396	31375	17749	24983	25381	36356	50601	60476	57077	25418	33880	36651	399947	14002.6	Transcriptional regulator
COG1397	5776	2357	6891	6590	6504	10923	20332	19719	5719	6782	6938	98531	5813.22	ADP-ribosylation Crystallin J1
COG1398	23148	10408	8316	9041	43063	39270	11577	12348	34581	26055	37980	255787	13591.9	desaturase
COG1399	7166	7475	12548	12872	7333	11883	21772	22552	6345	7748	8635	126329	5761.89	nucleic acidbinding protein
COG1400	0	6	8	14	2	4	26	9	2	2	2	75	7.57388	Involved in targeting and insertion of nascent membrane proteins into the cytoplasmic membrane. Binds directly to 7S RNA and mediates binding of the 54 kDa subunit of the SRP (By similarity)
COG1401	168	1924	649	824	349	735	1569	2014	606	387	360	9585	656.106	restriction endodeoxyribonuclease activity
COG1402	37852	14090	5770	4170	77641	67716	15772	14521	59888	42201	65102	404723	27331.3	K01470 creatinine amidohydrolase EC 3.5.2.10
COG1403	33482	12347	11186	8072	54978	54353	33591	33171	43360	37134	52238	373912	17167.1	HNH endonuclease
COG1404	32512	19255	29852	23234	37022	54617	81463	83365	28345	35827	38516	464008	21899.3	peptidase (S8 and S53, subtilisin, kexin, sedolisin
COG1405	0	18	26	46	8	16	76	36	9	6	6	247	22.6158	Stabilizes TBP binding to an archaeal box-A promoter. Also responsible for recruiting RNA polymerase II to the pre- initiation complex (DNA-TBP-TFIIB) (By similarity)
COG1406	854	2322	5564	4872	1015	2673	14648	15843	1400	1271	1088	51550	5456.49	chemotaxis protein
COG1407	3083	1197	269	2325	2733	3526	2828	1650	2362	3094	3775	26842	1045.99	NA
COG1408	10088	8126	13953	10967	11449	12224	26478	26255	11271	10943	13988	155742	6253.58	metallophosphoesterase
COG1409	13457	11067	20329	21241	13828	23270	33331	32262	11956	14550	15976	211267	7776.79	Hydrolyzes cAMP to 5'-AMP. Plays an important regulatory role in modulating the intracellular concentration of cAMP, thereby influencing cAMP-dependent processes (By similarity)
COG1410	23803	12818	15319	15249	44201	42831	30292	31949	35613	26897	38747	317719	11139.4	methionine synthase
COG1411	44	0	2	6	26	76	159	307	28	65	32	745	91.397	Histidine biosynthesis protein
COG1412	0	6	8	14	2	4	26	9	2	2	2	75	7.57388	small subunit (SSU) processome component, homolog
COG1413	43283	17906	17085	9772	81761	83241	50205	47447	67276	49411	74209	541596	26029.9	Catalyzes the hydroxylation of the N(6)-(4-aminobutyl)- L-lysine intermediate to form hypusine, an essential post- translational modification only found in mature eIF-5A factor (By similarity)
COG1414	29074	19773	41181	48601	34751	42351	46451	43563	24844	30377	32181	393147	9354.94	Iclr family transcriptional regulator
COG1415	4	7	78	15	8	20	490	24	3	2	2	653	144.488	Protein of unknown function (DUF763)
COG1416	1260	1096	769	1165	1212	1011	2965	3033	1244	1338	1444	16537	760.301	DsrE/DsrF-like family
COG1417	0	0	0	0	0	0	0	0	0	0	0	0	0	Domain of unknown function DUF22
COG1418	3290	3958	10197	6681	3505	7943	29870	28191	4112	3978	4324	106049	9830.87	Endoribonuclease that initiates mRNA decay (By similarity)
COG1419	3675	3385	6227	6100	3705	4167	16878	17109	4070	4204	5516	75036	5122.84	Flagellar biosynthesis regulator FlhF
COG1420	11131	3925	7210	5946	12011	13861	22554	20835	10842	11211	14591	134117	5716.05	Negative regulator of class I heat shock genes (grpE- dnaK-dnaJ and groELS operons). Prevents heat-shock induction of these operons (By similarity)
COG1421	600	324	1832	964	644	1389	5378	4939	709	742	708	18229	1782.05	CRISPR-associated protein Csm2 family
COG1422	0	6	8	14	2	4	26	9	2	2	2	75	7.57388	Integral membrane protein DUF106
COG1423	306	18	230	202	258	191	760	540	349	343	240	3437	195.717	ATP dependent DNA ligase
COG1424	20	2	145	60	6	12	571	327	12	10	24	1189	181.791	Catalyzes the transformation of pimelate into pimeloyl- CoA with concomitant hydrolysis of ATP to AMP (By similarity)
COG1426	41075	18910	12748	13732	80836	69953	23077	22671	63663	45852	69937	462454	25445.3	Cytoskeletal protein that is involved in cell-shape control through regulation of the length of the long axis (By similarity)
COG1427	643	268	2214	1381	505	902	6558	6688	683	644	680	21166	2381.51	periplasmic solute-binding protein
COG1428	5212	3000	3337	1741	5484	3646	9323	9875	5841	4933	7165	59557	2558.6	Deoxynucleoside kinase
COG1429	38991	14720	4228	4401	78984	69797	11483	11497	62098	44149	67049	407397	28915.1	cobaltochelatase, cobn subunit
COG1430	7999	4173	4174	5519	8259	10755	14480	12323	6931	8783	10152	93548	3276.65	exported protein
COG1431	291	17	226	191	231	150	762	528	308	312	211	3227	199.464	stem cell self-renewal protein Piwi
COG1432	9457	5127	6529	8601	10129	13934	20172	18281	9671	10807	12019	124727	4590.24	conserved protein
COG1433	1315	2267	9537	5643	1312	3976	25487	26797	1838	1589	1855	81616	9584.6	Dinitrogenase iron-molybdenum cofactor biosynthesis protein
COG1434	13076	7796	12277	12193	13993	12191	22951	20702	14801	13060	18517	161557	4366.05	conserved protein
COG1435	4398	4664	3597	4630	4955	6935	9996	9786	3784	4749	4834	62328	2255.66	THymidine Kinase
COG1436	1	6	8	60	2	4	26	21	4	2	2	136	17.8341	Subunit of the peripheral V1 complex of vacuolar ATPase essential for assembly or catalytic function. V-ATPase is responsible for acidifying a variety of intracellular compartments in eukaryotic cells (By similarity)
COG1437	297	2236	1452	827	237	728	3894	4520	252	285	382	15110	1536.06	Adenylate cyclase
COG1438	2726	2654	2981	3682	3169	5279	6174	7307	2005	2809	2740	41526	1702.73	Regulates arginine biosynthesis genes (By similarity)
COG1439	0	6	8	14	2	4	26	9	2	2	2	75	7.57388	NIN1 RPN12 binding protein 1 homolog (S. cerevisiae)
COG1440	9	889	499	336	9	5	10	45	41	8	15	1866	289.82	protein-N(PI)-phosphohistidine-sugar phosphotransferase activity
COG1441	27	1474	502	65	12	3	6	21	26	8	9	2153	448.295	Converts SHCHC to OSB (By similarity)
COG1442	668	247	51	236	686	1058	318	234	951	870	1078	6397	376.113	glycosyl transferase, family 8
COG1443	2464	2550	4174	2827	2264	3405	11895	10568	2414	2732	2875	48168	3442.6	Catalyzes the 1,3-allylic rearrangement of the homoallylic substrate isopentenyl (IPP) to its highly electrophilic allylic isomer, dimethylallyl diphosphate (DMAPP) (By similarity)
COG1444	943	1257	753	2789	979	642	1163	1888	940	1199	1219	13772	605.571	Catalyzes the formation of N(4)-acetylcytidine (ac(4)C) at the wobble position of tRNA(Met), by using acetyl-CoA as an acetyl donor and ATP (or GTP) (By similarity)
COG1445	212	1119	736	878	123	98	162	804	391	157	126	4806	374.259	PTS System
COG1446	3419	2958	4163	5086	3377	4637	12609	11745	3876	3852	4427	60149	3376.9	asparaginase
COG1447	9	877	504	167	11	7	9	53	42	7	13	1699	281.734	IIa component
COG1448	1304	5070	5763	9456	1456	923	3986	2845	1414	1536	1584	35337	2652.11	aminotransferase
COG1449	1481	741	4123	2248	1302	3857	12268	11205	1955	1850	2001	43031	4004.22	hydrolase family 57
COG1450	23890	13765	14645	15669	44431	35924	28159	28098	37434	26449	39767	308231	10548	general secretion pathway protein D
COG1451	5380	7066	11402	12634	5944	10573	20597	20874	5186	6000	5977	111633	5842.03	metaL-dependent hydrolase
COG1452	18618	13476	18286	14453	19891	28050	38853	42930	14838	20227	24475	254097	9824.7	involved in the assembly of LPS in the outer leaflet of the outer membrane. Determines N-hexane tolerance and is involved in outer membrane permeability. Essential for envelope biogenesis (By similarity)
COG1453	35468	13599	2876	1888	74585	63393	6518	7963	59245	40028	63144	368707	28076.7	Aldo keto reductase
COG1454	17173	14424	26055	27264	19028	23635	36533	36782	15382	18541	22036	256853	7757.44	alcohol dehydrogenase
COG1455	91	2356	999	667	36	23	36	88	57	33	32	4418	724.134	pts system
COG1456	440	652	5584	3276	590	2627	15810	16007	831	812	750	47379	5948.14	Acetyl-CoA decarbonylase synthase complex subunit gamma
COG1457	4912	4655	10847	16036	5927	8991	4740	5724	3309	4979	4700	74820	3751.33	permease for cytosine purines, uracil, thiamine, allantoin
COG1458	288	11	285	191	229	143	1068	528	308	312	211	3574	277.231	UPF0278 protein
COG1459	32616	20666	24406	25607	53658	51443	41122	43804	42343	35858	49669	421192	11383.5	Type ii secretion system
COG1460	0	6	8	14	2	4	26	9	2	2	2	75	7.57388	rna polymerase
COG1461	2337	965	2417	1890	3019	5190	6417	5545	1765	2515	2326	34386	1764.72	dak2 domain fusion protein ylov
COG1462	884	2200	2093	3698	808	1655	5085	5669	790	946	1005	24833	1775.71	Curli production assembly transport component CsgG
COG1463	44744	20102	20596	25009	68537	63654	41438	52488	55542	47368	63086	502564	17391.2	Mammalian cell entry related domain protein
COG1464	407	6154	14526	17891	402	392	2638	3348	435	472	452	47117	6216.19	(Lipo)protein
COG1465	3	29	0	1	0	0	0	0	0	0	0	33	8.67179	oxidoreductase activity, acting on the CH-NH2 group of donors, NAD or NADP as acceptor
COG1466	30708	16736	16500	14886	51453	52245	33982	34988	39494	34439	47498	372929	13533	DNA polymerase III (delta' subunit)
COG1467	0	6	8	14	2	4	26	9	2	2	2	75	7.57388	DNA primase is the polymerase that synthesizes small RNA primers for the Okazaki fragments on both template strands at replication forks during chromosomal DNA synthesis (By similarity)
COG1468	1420	882	2784	1365	1653	4672	8584	7001	2213	2033	2086	34693	2522.51	crispr-associated protein cas4
COG1469	1321	884	2969	3534	1468	2111	8889	9623	1535	1729	1773	35836	3062.69	Converts GTP to 7,8-dihydroneopterin triphosphate (By similarity)
COG1470	2270	427	253	180	2957	3861	985	406	1363	2425	2252	17379	1247.82	domain protein
COG1471	0	6	8	14	2	4	26	9	2	2	2	75	7.57388	(ribosomal) protein
COG1472	40273	20034	22635	21962	62819	66166	52401	55714	48636	43887	58292	492819	16740.3	hydrolase family 3
COG1473	29012	15832	22279	23857	49161	46734	43188	39592	40522	32431	45157	387765	11203.4	amidohydrolase
COG1474	1	55	26	37	7	14	55	28	9	5	7	244	19.6663	Involved in regulation of DNA replication (By similarity)
COG1475	18711	14843	25343	26214	20803	28499	55051	50306	17384	20461	23592	301207	13174.9	parb-like partition protein
COG1476	9535	8199	11990	13046	10986	17917	34471	34655	9464	10812	11195	172270	9679.45	Transcriptional regulator
COG1477	7210	6921	8528	8825	7847	10639	24145	24112	7296	8042	7991	121556	6543.14	(LipO)protein
COG1478	2406	773	2432	1854	3098	5365	7772	5968	1795	2543	2352	36358	2125.74	Catalyzes the GTP-dependent successive addition of two or more gamma-linked L-glutamates to the L-lactyl phosphodiester of 7,8-didemethyl-8-hydroxy-5-deazariboflavin (F420-0) to form coenzyme F420-0-glutamyl-glutamate (F420-2) or polyglutamated F420 derivatives (By similarity)
COG1479	2168	5297	3266	1774	2105	3178	6170	6908	2855	2677	2942	39340	1736.98	conserved protein
COG1480	21546	8023	5691	3135	41679	37411	15615	15110	32397	23974	35853	240434	13542.9	Metal Dependent Phosphohydrolase
COG1481	2317	888	986	1129	2842	4430	1988	2289	1612	2370	2225	23076	1002.71	May be required for sporulation (By similarity)
COG1482	4174	3761	5050	3949	4926	7396	14242	12025	3821	4526	4477	68347	3599.02	mannose-6-phosphate isomerase
COG1483	374	96	1723	996	522	1010	6456	4090	517	523	373	16680	1979.83	ATPase (AAA superfamily)-like protein
COG1484	13196	9213	25065	29720	14834	28573	70056	64379	14218	15866	16253	301373	20786.2	IstB domain protein ATP-binding protein
COG1485	10048	7993	10347	12162	10784	14917	17329	18189	7747	11394	13037	133947	3442.39	AFG1 family ATPase
COG1486	4916	2118	1200	503	5829	2623	2585	1353	5951	5215	7764	40057	2381.96	glycoside hydrolase family 4
COG1487	10739	5286	16216	13522	12126	20834	37012	33720	8712	11528	11517	181212	10165	Toxic component of a toxin-antitoxin (TA) module. A
COG1488	10550	7231	12768	10414	11614	11603	22361	22038	10819	10975	13794	144167	4780.96	Nicotinate phosphoribosyltransferase
COG1489	25497	11047	6225	5421	46072	42275	15062	18246	35356	28186	41973	275360	14910	Sugar fermentation stimulation protein homolog
COG1490	5542	6922	12541	12870	6079	9825	21884	22485	5410	6267	6489	116314	6326.59	Hydrolyzes D-tyrosyl-tRNA(Tyr) into D-tyrosine and free tRNA(Tyr). Could be a defense mechanism against a harmful effect of D-tyrosine (By similarity)
COG1491	0	6	8	14	2	4	26	9	2	2	2	75	7.57388	Rna-binding protein
COG1492	21629	9970	5581	5916	42022	38267	15489	14637	33144	24400	35709	246764	13232.8	catalyzes amidations at positions B, D, E, and G on adenosylcobyrinic A,C-diamide. NH(2) groups are provided by glutamine, and one molecule of ATP is hydrogenolyzed for each amidation (By similarity)
COG1493	1255	1351	4107	3426	1453	3586	15912	14121	1517	1605	1646	49979	5292.21	Catalyzes the ATP- as well as the pyrophosphate- dependent phosphorylation of a specific serine residue in HPr, a phosphocarrier protein of the phosphoenolpyruvate-dependent sugar phosphotransferase system (PTS). HprK P also catalyzes the pyrophosphate-producing, inorganic phosphate-dependent dephosphorylation (phosphorolysis) of seryl-phosphorylated HPr (P- Ser-HPr). The two antagonistic activit…
COG1494	27034	11077	6912	3921	48261	46681	18531	18751	36153	29635	43114	290070	15858.3	Fructose-1,6-bisphosphatase
COG1495	11818	8127	9798	10733	13074	14453	16410	17147	10088	12679	15881	140208	2960.61	Required for disulfide bond formation in some periplasmic proteins. Acts by oxidizing the DsbA protein (By similarity)
COG1496	32069	15177	16205	14710	53394	51589	33159	34279	41477	35194	49952	377205	14296.7	Multi-copper polyphenol oxidoreductase laccase
COG1497	0	6	8	14	2	4	26	9	2	2	2	75	7.57388	Transcriptional regulator
COG1498	0	6	8	14	2	4	26	9	2	2	2	75	7.57388	Nucleolar protein
COG1499	0	6	8	14	2	4	26	9	2	2	2	75	7.57388	60S ribosomal export protein Nmd3
COG1500	0	6	8	14	2	4	26	9	2	2	2	75	7.57388	Ribosome maturation protein
COG1501	3770	3378	3593	5224	4382	6455	9500	10956	3694	4077	4088	59117	2573.81	hydrolase, family 31
COG1502	11863	16976	33064	39307	12261	20323	40970	44664	12886	13703	14825	260842	13008.6	Catalyzes the reversible phosphatidyl group transfer from one phosphatidylglycerol molecule to another to form cardiolipin (CL) (diphosphatidylglycerol) and glycerol (By similarity)
COG1503	2534	674	2868	1518	3147	4744	8334	7342	1564	2654	2602	37981	2414.41	Peptide Chain Release Factor
COG1504	0	0	65	1	5	10	418	11	0	1	0	511	124.683	Protein of unknown function (DUF498/DUF598)
COG1505	3820	3625	510	2813	4282	5860	3786	2772	3200	4054	4173	38895	1309.91	prolyl oligopeptidase
COG1506	50626	37150	49250	59652	73366	86606	106727	104707	58261	54967	67619	748931	22719.5	peptidase s9 prolyl oligopeptidase active site domain protein
COG1507	2394	763	1001	2140	2903	4527	2141	2664	1710	2444	2301	24988	996.248	Septum formation initiator family protein
COG1508	5431	6892	10208	12001	5342	5385	17449	17228	5905	6146	7406	99393	4619.88	Sigma factors are initiation factors that promote the attachment of RNA polymerase to specific initiation sites and are then released (By similarity)
COG1509	1710	4172	13513	13211	1884	4338	24250	27080	2556	2264	2546	97524	9352.69	Lysine 2,3-aminomutase YodO family protein
COG1510	1725	1265	4510	4451	1775	4047	11999	13299	2379	2047	2259	49756	4183.16	Transcriptional regulator
COG1511	8985	4912	3120	1952	10440	13059	7895	10363	6112	9180	11236	87254	3513.1	domain protein
COG1512	20620	11022	10595	10281	40169	36307	20428	17881	32822	23421	35252	258798	11014.4	of methanol dehydrogenase type
COG1513	1481	503	48	2044	1125	2209	753	1034	815	1365	1807	13184	663.261	Catalyzes the reaction of cyanate with bicarbonate to produce ammonia and carbon dioxide (By similarity)
COG1514	5023	3476	8355	7558	5653	11289	24750	23139	5345	5608	5635	105831	7383.69	2'-5' rna ligase
COG1515	402	322	1492	2143	463	1776	4638	3465	677	633	660	16671	1414.16	Selectively cleaves double-stranded DNA at the second phosphodiester bond 3' to a deoxyinosine leaving behind the intact lesion on the nicked DNA. Acts in DNA repair (By similarity)
COG1516	4169	3113	5324	6524	4880	6057	16008	14833	3801	4572	4656	73937	4413.76	flagellar protein FliS
COG1517	0	0	0	0	0	0	0	0	0	0	0	0	0	CRISPR-Associated Protein
COG1518	3770	3543	10153	7922	4042	9193	31076	28044	4665	4613	4806	111827	9873.89	CRISPR (clustered regularly interspaced short palindromic repeat), is an adaptive immune system that provides protection against mobile genetic elements (viruses, transposable elements and conjugative plasmids). CRISPR clusters contain sequences complementary to antecedent mobile elements and target invading nucleic acids. CRISPR clusters are transcribed and processed into CRISPR RNA (crRNA). Act…
COG1519	13672	9432	13826	12167	14556	16565	25778	28595	11962	14607	18004	179164	5881.97	3-Deoxy-D-manno-octulosonic-acid transferase
COG1520	23611	11294	20684	17620	26260	30195	49177	46889	21990	24993	28833	301546	11466.5	Part of the outer membrane protein assembly complex, which is involved in assembly and insertion of beta-barrel proteins into the outer membrane (By similarity)
COG1521	33024	15525	16403	14914	54250	52295	35398	36430	42433	36152	51079	387903	14555.8	Catalyzes the phosphorylation of pantothenate (Pan), the first step in CoA biosynthesis (By similarity)
COG1522	38313	36407	55988	75412	41774	45396	69006	57639	35861	42286	44873	542955	13388.9	transcriptional regulator AsnC family
COG1523	23245	13219	7742	6821	43363	41174	18915	20284	34033	25717	37590	272103	12915.5	Glycogen debranching enzyme
COG1524	7772	4127	6868	6985	9100	9322	20568	20084	8791	7988	9783	111388	5276.14	type i phosphodiesterase nucleotide pyrophosphatase
COG1525	32071	14300	13239	9272	52545	53133	39157	40978	42019	35302	50929	382945	16015.3	nuclease
COG1526	13210	6834	8044	5515	14973	18590	22651	23055	10849	13990	17070	154781	5979.89	Necessary for formate dehydrogenase activity (By similarity)
COG1527	1	6	8	60	2	4	26	21	4	2	2	136	17.8341	ATP synthase, subunit
COG1528	18569	9992	3396	1949	38171	32506	7362	8831	30499	20830	32517	204622	13118.3	Stores iron in a soluble, non-toxic, readily available form. Important for iron homeostasis (By similarity)
COG1529	17797	8762	22273	23185	21099	31197	67592	66423	17314	20013	20646	316301	19641	Aldehyde oxidase and xanthine dehydrogenase, molybdopterin binding
COG1530	39465	21603	21765	24024	60919	54387	36182	39226	49404	42577	60259	449811	14432.6	ribonuclease
COG1531	288	16	230	204	231	146	742	537	310	314	212	3230	195.581	UPF0248 protein
COG1532	0	0	64	0	0	0	351	0	0	0	0	415	105.66	Rna-binding protein
COG1533	2544	1903	5890	5835	2574	5816	18706	17416	3174	2922	2883	69663	5985.51	radical SAM domain protein
COG1534	1177	3655	6118	8768	1193	867	4283	5061	1321	1261	1411	35115	2615.61	Rna-binding protein
COG1535	713	2571	4999	5218	815	280	205	407	884	870	1039	18001	1828.83	isochorismatase
COG1536	6873	4280	7038	7963	7426	8402	20881	20652	6471	7629	8594	106209	5614.32	FliG is one of three proteins (FliG, FliN, FliM) that forms the rotor-mounted switch complex (C ring), located at the base of the basal body. This complex interacts with the CheY and CheZ chemotaxis proteins, in addition to contacting components of the motor that determine the direction of flagellar rotation (By similarity)
COG1537	0	6	12	14	2	4	30	10	2	2	2	84	8.75526	May function in recognizing stalled ribosomes, interact with stem-loop structures in stalled mRNA molecules, and effect endonucleolytic cleavage of the mRNA. May play a role in the release non-functional ribosomes and degradation of damaged mRNAs. Has endoribonuclease activity (By similarity)
COG1538	58684	51625	86486	95176	79751	82557	166756	159967	72518	62860	83976	1000356	38090	Membrane
COG1539	30778	17172	14000	15377	51298	50825	28051	28159	39154	34235	47282	356331	13663.2	dihydroneopterin aldolase
COG1540	14435	5852	6221	5603	16213	17507	16252	18119	11956	15432	18698	146288	5096.36	lamb ycsf family protein
COG1541	11564	8769	19922	15769	13514	19857	43201	41248	9989	12965	12933	209731	11988	Phenylacetate-CoA ligase
COG1542	0	0	0	0	0	0	0	0	0	0	0	0	0	Protein of unknown function (DUF505)
COG1543	17742	6551	793	400	37328	31290	2033	1654	29472	19966	31418	178647	14459.5	hydrolase family 57
COG1544	27660	16774	14152	14867	47805	43150	27043	25748	38892	30629	43462	330182	11991.7	sigma 54 modulation protein ribosomal protein S30ea
COG1545	5633	3059	6276	8108	7271	12987	22263	19938	5572	6139	5740	102986	6311.9	Nucleic-acid-binding protein containing a Zn-ribbon
COG1546	29666	16169	18985	19949	50506	47668	28897	29466	40224	32767	47552	361849	12148.9	competence damage-inducible protein
COG1547	1710	909	260	109	1429	3418	856	435	1314	1764	2318	14522	975.516	Domain of unknown function (DUF309)
COG1548	44	0	2	6	26	76	159	307	28	65	32	745	91.397	H4MPT-linked C1 transfer pathway protein
COG1549	0	6	8	14	2	4	26	9	2	2	2	75	7.57388	PUA domain containing protein
COG1550	2704	1103	4710	2930	3427	6476	13343	12243	2186	3062	2849	55033	4096.93	Protein of unknown function (DUF503)
COG1551	4824	4965	12223	13187	5116	7963	20633	21320	4444	5230	4987	104892	6425.16	regulation of carbohydrate metabolic process
COG1552	0	6	8	14	2	4	26	9	2	2	2	75	7.57388	Ribosomal protein
COG1553	1091	3925	5655	8436	1076	784	2550	3116	1207	1187	1320	30347	2420.99	Part of a sulfur-relay system required for 2-thiolation of 5-methylaminomethyl-2-thiouridine (mnm(5)s(2)U) at tRNA wobble positions. Accepts sulfur from TusA and transfers it in turn to TusE (By similarity)
COG1554	3904	1299	2950	2268	4382	6375	7695	7658	3230	4112	4068	47941	2083.88	hydrolase family 65
COG1555	7135	7477	13929	14794	7476	11857	25285	26078	7350	8077	8540	137998	7046.52	Competence protein
COG1556	2739	3287	1822	2100	3406	5599	6087	4467	2064	2898	2716	37185	1425.64	Is involved in L-lactate degradation and allows cells to grow with lactate as the sole carbon source (By similarity)
COG1558	10487	4804	7248	8084	11713	9810	22015	21390	10622	10719	13567	130459	5395.54	flagellar basal-body rod protein flgc
COG1559	9146	8359	12640	13709	9796	12774	24282	23034	9025	10079	11434	144278	5494.93	Aminodeoxychorismate lyase
COG1560	17126	15748	26956	25928	18686	22390	36051	37916	14853	18324	21683	255661	7825.89	lipid a biosynthesis
COG1561	3597	4672	5691	6020	3392	4666	15616	16455	3861	3995	4236	72201	4756.06	YicC domain protein
COG1562	32996	12084	8818	4799	54015	52546	27135	25665	42084	36172	50924	347238	17665.5	phytoene synthase
COG1563	4425	985	214	87	4435	3776	638	610	4485	3838	6215	29708	2203.39	H antiporter subunit B
COG1564	937	2112	1932	1048	1010	1505	5584	6214	945	1178	1308	23773	1893.76	thiamine diphosphokinase activity
COG1565	28413	10587	6646	3582	49023	44376	20992	20314	38154	31088	45713	298888	16102.1	NADH dehydrogenase ubiquinone complex I, assembly factor 7
COG1566	47675	42631	58904	70138	67726	74623	93588	85150	61415	53639	69705	725194	15303.7	secretion protein HlyD family
COG1567	602	324	1832	964	644	1389	5385	4943	709	742	708	18242	1784.13	CRISPR-associated RAMP protein, Csm4 family
COG1568	0	6	8	16	2	4	26	9	2	2	2	77	7.7846	Protein of unknown function DUF43
COG1569	3263	1194	3597	3055	3835	7391	12585	10886	2843	3711	3761	56121	3608.89	PilT protein domain protein
COG1570	28206	12959	13331	14107	49081	42364	26126	25357	40007	30784	45070	327392	13056.9	Bidirectionally degrades single-stranded DNA into large acid-insoluble oligonucleotides, which are then degraded further into small acid-soluble oligonucleotides (By similarity)
COG1571	3	586	9	30	4	9	26	19	4	3	4	697	173.608	ATP-dependent agmatine transferase that catalyzes the formation of 2-agmatinylcytidine (agm2C) at the wobble position (C34) of tRNA(Ile2), converting the codon specificity from AUG to AUA (By similarity)
COG1572	90	27	81	27	82	107	249	161	190	110	144	1268	67.0702	domain protein
COG1573	40424	17111	17802	12237	62927	68695	51083	50746	46866	44496	59661	472048	19327.5	uracil-dna glycosylase
COG1574	8099	4443	12108	13993	9386	12929	28731	24730	7124	8614	8632	138789	7539.09	amidohydrolase
COG1575	22078	11492	6918	5336	42477	39541	16943	16782	33544	24845	36591	256547	13154.4	1,4-dihydroxy-2-naphthoate octaprenyltransferase
COG1576	22251	12861	9396	11544	41785	34279	15063	14913	34077	24922	37583	258674	11680.3	rRNA processing
COG1577	2363	3914	3761	2070	2412	3898	10094	10496	2761	2828	3185	47782	3010.13	mevalonate kinase
COG1578	309	254	1747	1031	240	734	4868	5218	238	287	381	15307	1864.94	Protein of unknown function DUF89
COG1579	4121	3008	5417	3606	4726	7870	14786	14984	3902	4566	4564	71550	4327.81	Zn-ribbon protein
COG1580	11553	6568	8366	10363	12824	11210	23561	22664	11935	11851	15019	145914	5346.15	Flagellar basal body-associated protein flil
COG1581	0	6	8	20	4	9	26	18	4	3	4	102	8.31975	Binds double-stranded DNA tightly but without sequence specificity. It is distributed uniformly and abundantly on the chromosome, suggesting a role in chromatin architecture. However, it does not significantly compact DNA. Binds rRNA and mRNA in vivo. May play a role in maintaining the structural and functional stability of RNA, and, perhaps, ribosomes (By similarity)
COG1582	2294	888	2193	1699	2802	4627	5597	4963	1574	2323	2190	31150	1530.48	flagellar FlbD family protein
COG1583	603	273	1655	886	473	911	4636	4605	565	610	616	15833	1612.32	endonuclease activity
COG1584	99	1605	1673	932	113	1143	3298	2624	225	79	72	11863	1122.64	gpr1 fun34 YaaH family protein
COG1585	1860	4277	8448	9678	1785	3659	10316	11121	2447	2127	2406	58124	3776.63	Membrane
COG1586	18603	7637	3906	3916	38378	32822	11506	11000	30470	20868	32449	211555	12596.3	Catalyzes the decarboxylation of S-adenosylmethionine to S-adenosylmethioninamine (dcAdoMet), the propylamine donor required for the synthesis of the polyamines spermine and spermidine from the diamine putrescine (By similarity)
COG1587	31448	18141	14916	14228	52024	51692	29302	30057	40436	35042	48253	365539	13884.5	synthase
COG1588	0	6	8	14	2	4	26	9	2	2	2	75	7.57388	Part of ribonuclease P, a protein complex that generates mature tRNA molecules by cleaving their 5'-ends (By similarity)
COG1589	30269	16541	16416	14892	51094	51938	33777	34895	39161	33934	47018	369935	13425.7	Essential cell division protein. May link together the upstream cell division proteins, which are predominantly cytoplasmic, with the downstream cell division proteins, which are predominantly periplasmic. May control correct divisome assembly (By similarity)
COG1590	0	6	8	14	2	4	26	9	2	2	2	75	7.57388	tRNA-yW synthesizing protein 3 homolog (S. cerevisiae)
COG1591	0	6	8	14	2	4	26	9	2	2	2	75	7.57388	Holliday junction resolvase
COG1592	6565	3630	10728	5311	6772	15175	29609	32037	3949	7423	8427	129626	9964.68	Rubrerythrin
COG1593	19236	12988	16802	27732	20835	21064	34664	37778	17402	22085	25039	255625	7574.92	trap dicarboxylate transporter dctm subunit
COG1594	1	35	9	14	3	5	26	27	4	3	2	129	12.0755	DNA-dependent RNA polymerase catalyzes the transcription of DNA into RNA using the four ribonucleoside triphosphates as substrates (By similarity)
COG1595	102232	53806	99960	98733	116109	167124	263205	255041	93099	111310	112817	1473436	67261.7	RNA Polymerase
COG1596	9622	9171	18296	20856	8973	15744	45278	43598	10091	10755	11899	204283	13382.8	polysaccharide transmembrane transporter activity
COG1597	10730	7088	16341	18337	12662	21094	34886	34045	9997	11840	11826	188846	9423.01	diacylglycerol kinase
COG1598	2892	1619	8180	4757	2598	6707	24875	23875	3365	3377	3433	85678	8415.56	family UPF0150
COG1599	0	11	17	27	4	7	51	18	5	3	3	146	14.9472	DNA replication
COG1600	21298	11991	21132	17875	41125	38649	48872	45068	33482	24274	36251	340017	12175.1	Catalyzes the conversion of epoxyqueuosine (oQ) to queuosine (Q), which is a hypermodified base found in the wobble positions of tRNA(Asp), tRNA(Asn), tRNA(His) and tRNA(Tyr) (By similarity)
COG1601	0	6	8	14	2	4	26	9	2	2	2	75	7.57388	translation Initiation Factor
COG1602	0	6	8	14	2	4	26	9	2	2	2	75	7.57388	Archaeal protein of unknown function (DUF650)
COG1603	0	0	0	0	0	0	0	0	0	0	0	0	0	Part of ribonuclease P, a protein complex that generates mature tRNA molecules by cleaving their 5'-ends (By similarity)
COG1604	36	72	218	108	208	576	856	398	193	169	128	2962	248.285	Crispr-associated ramp protein, Cmr6 family
COG1605	13552	7744	11815	12591	14551	16879	24260	24273	11821	14288	17736	169510	5122.61	Chorismate mutase
COG1606	20088	7546	4006	2923	40382	36897	10395	10602	31368	22562	33896	220665	13830.8	pp-loop domain protein
COG1607	7652	12515	17066	21813	8147	10548	23311	23221	7516	8476	8910	149175	6535.97	thioesterase Superfamily protein
COG1608	16	76	223	122	180	532	854	386	156	140	102	2787	247.507	Aspartate glutamate uridylate kinase
COG1609	46052	26714	26079	37082	54820	69600	69558	61692	40293	50198	51651	533739	15154.1	Transcriptional regulator
COG1610	15717	10247	16193	13390	17434	21732	33491	34602	13676	16753	20129	213364	7893.09	gatB Yqey
COG1611	18060	14069	24936	26105	18627	23606	48432	45619	18050	18953	23210	279667	11277.1	decarboxylase
COG1612	32669	12676	8511	7831	53852	50866	24876	24922	41813	35551	50538	344105	17002.7	Catalyzes the oxidation of the C8 methyl side group on heme O porphyrin ring into a formyl group (By similarity)
COG1613	743	4571	10214	11627	918	1953	2957	2914	1427	1166	1149	39639	3804.29	Sulfate ABC transporter periplasmic sulfate-binding protein
COG1614	307	22	1532	876	244	355	4762	3636	334	324	214	12606	1584.54	Part of a complex that catalyzes the reversible cleavage of acetyl-CoA, allowing autotrophic growth from CO(2) (By similarity)
COG1615	4053	1330	1412	1399	4107	7330	3419	3516	2790	4025	4446	37827	1745.46	Uncharacterised protein family (UPF0182)
COG1617	0	6	8	14	2	4	26	9	2	2	2	75	7.57388	KEOPS complex Cgi121-like subunit
COG1618	0	198	12	14	2	4	26	9	2	2	2	271	58.0143	Has nucleotide phosphatase activity towards ATP, GTP, CTP, TTP and UTP. May hydrolyze nucleoside diphosphates with lower efficiency (By similarity)
COG1619	21176	11880	6199	4375	40329	36303	14101	15975	32293	23423	36031	242085	12678.6	Peptidase U61, LD-carboxypeptidase A
COG1620	464	3674	6667	9375	633	2082	5827	4568	738	663	573	35264	3063.85	L-Lactate permease
COG1621	3148	1801	1322	984	3703	3936	3262	3144	2355	3273	3277	30205	982.661	Hydrolase
COG1622	35304	16581	17394	19988	56317	55894	39793	40054	44293	38569	53678	417865	14710.4	Subunits I and II form the functional core of the enzyme complex. Electrons originating in cytochrome c are transferred via heme a and Cu(A) to the binuclear center formed by heme a3 and Cu(B) (By similarity)
COG1623	2316	881	979	1053	2839	4426	1986	2252	1609	2370	2222	22933	1010.16	Participates in a DNA-damage check-point. DisA forms globular foci that rapidly scan along the chromosomes searching for lesions (By similarity)
COG1624	19096	7571	5875	3283	38704	34193	16296	15686	31043	21554	33263	226564	12305.4	TIGR00159 family
COG1625	17368	6521	582	213	37053	31118	1606	960	29021	19579	31098	175119	14470.9	oxidoreductase
COG1626	320	179	477	1149	288	294	2188	2287	327	356	386	8251	778.648	trehalase
COG1627	0	0	0	0	0	0	0	0	0	0	0	0	0	Protein of unknown function (DUF515)
COG1628	16	16	42	20	30	35	81	50	65	47	70	472	22.2327	UPF0215 protein
COG1629	41288	79147	80861	127940	41000	64057	242104	181425	42622	42193	47151	989788	67043.3	receptor
COG1630	0	0	0	0	0	0	0	0	0	0	0	0	0	NurA domain-containing protein
COG1631	0	6	8	14	2	4	26	9	2	2	2	75	7.57388	Ribosomal protein
COG1632	0	6	8	14	2	4	26	9	2	2	2	75	7.57388	Ribosomal protein L15
COG1633	1476	1088	6873	4169	1444	3247	20371	19492	1757	1860	1736	63513	7199.77	Rubrerythrin
COG1634	0	6	8	14	2	4	26	9	2	2	2	75	7.57388	Catalyzes the transfer of pyrophosphate from ATP to 6- hydroxymethyl-7,8-dihydropterin (6-HMD), leading to 6- hydroxymethyl-7,8-dihydropterin diphosphate (6-HMDP) (By similarity)
COG1635	3	6	8	14	2	4	26	9	2	2	2	78	7.35465	Involved in biosynthesis of the thiamine precursor thiazole. Catalyzes the conversion of NAD and glycine to adenosine diphosphate 5-(2-hydroxyethyl)-4-methylthiazole-2-carboxylic acid (ADT), an adenylated thiazole intermediate. The reaction includes an iron-dependent sulfide transfer from a conserved cysteine residue of the protein to a thiazole intermediate. The enzyme can only undergo a single …
COG1636	409	1449	820	658	321	270	2886	2336	503	438	334	10424	895.116	DNA integration recombination invertion protein
COG1637	2310	740	240	556	2884	3320	126	1008	1566	2395	2239	17384	1111.34	Cleaves both 3' and 5' ssDNA extremities of branched DNA structures (By similarity)
COG1638	27351	16409	22479	32649	29980	36096	50076	55452	22216	31211	34723	358642	11632.3	Trap dicarboxylate transporter, dctp subunit
COG1639	6973	8020	16750	13839	7167	10007	46436	47456	8041	7949	8565	181203	15366	HDOD domain
COG1640	20847	10538	6914	5031	41132	38062	18767	17865	31854	23432	34720	249162	12474.4	4-alpha-glucanotransferase
COG1641	20131	7569	4034	2950	40434	36952	10451	10674	31426	22629	33949	221199	13838.9	UPF0272 protein
COG1643	6804	7455	11228	16111	7204	10188	18376	20190	6118	7392	7910	118976	5062.66	helicase
COG1644	0	6	8	14	2	4	26	9	2	2	2	75	7.57388	DNA-dependent RNA polymerase catalyzes the transcription of DNA into RNA using the four ribonucleoside triphosphates as substrates
COG1645	0	0	0	0	0	0	0	0	0	0	0	0	0	Sjogrens syndrome scleroderma autoantigen 1
COG1646	1237	692	1607	803	1105	1477	4203	4606	1241	1316	1566	19853	1319.57	Prenyltransferase that catalyzes the transfer of the geranylgeranyl moiety of geranylgeranyl diphosphate (GGPP) to the C3 hydroxyl of sn-glycerol-1-phosphate (G1P). This reaction is the first ether-bond-formation step in the biosynthesis of archaeal membrane lipids (By similarity)
COG1647	4079	1578	2698	3149	4640	7616	8149	7272	4001	4702	4745	52629	2097.04	carboxylesterase (ec 3.1.1.1)
COG1648	4782	3349	3870	5067	5503	6921	11323	10918	4385	5360	5358	66836	2662.73	Multifunctional enzyme that catalyzes the SAM-dependent methylation of uroporphyrinogen III at position C-2 and C-7 to form precorrin-2 and then position C-12 or C-18 to form trimethylpyrrocorphin 2. It also catalyzes the conversion of precorrin-2 into siroheme. This reaction consists of the NAD- dependent oxidation of precorrin-2 into sirohydrochlorin and its subsequent ferrochelation into siroh…
COG1649	5576	2272	4280	2223	5253	10352	11382	12785	4101	5690	6622	70536	3578	carbohydrate metabolic process
COG1650	0	6	8	14	2	4	26	9	2	2	2	75	7.57388	Hydrolyzes D-tyrosyl-tRNA(Tyr) into D-tyrosine and free tRNA(Tyr) (By similarity)
COG1651	25406	17284	31013	34431	29118	30162	52736	52851	26176	27082	34970	361229	10966	Thiol disulfide interchange protein
COG1652	6271	7142	15147	16749	6723	8032	15517	18779	6233	6883	7113	114589	4965.48	domain protein
COG1653	78617	29776	31617	27981	91291	114364	85756	82368	65648	85469	97337	790224	29533.2	transporter activity
COG1654	0	0	0	0	0	0	0	0	0	0	0	0	0	biotin-[acetyl-CoA-carboxylase] ligase activity
COG1655	1	198	4	1	0	0	0	1	1	0	0	206	59.4695	Uncharacterized protein conserved in bacteria (DUF2225)
COG1656	2575	687	2908	1519	3183	4777	8452	7415	1645	2708	2674	38543	2436.69	Pfam:DUF82
COG1657	799	467	1225	791	679	1542	5074	3410	1006	923	902	16818	1419.84	Squalene--hopene cyclase
COG1658	3	406	94	100	6	11	382	37	8	2	4	1053	151.794	ribonuclease M5 activity
COG1659	309	24	261	216	261	176	782	734	384	362	284	3793	226.157	linocin_m18 bacteriocin protein
COG1660	6297	5717	10597	12700	6910	8277	17554	17790	5973	7054	8112	106981	4445.2	Displays ATPase and GTPase activities (By similarity)
COG1661	17397	7507	4085	2012	37061	31194	10176	9385	28961	19528	30944	198250	12339.2	DNA-binding protein
COG1662	1476	753	999	359	1144	3935	2999	2379	1979	1778	1968	19769	1036.4	IS1 Transposase
COG1663	13394	9302	13825	12136	14294	16406	25747	28526	11784	14214	17707	177335	5916.18	Transfers the gamma-phosphate of ATP to the 4'-position of a tetraacyldisaccharide 1-phosphate intermediate (termed DS-1- P) to form tetraacyldisaccharide 1,4'-bis-phosphate (lipid IVA) (By similarity)
COG1664	7583	4923	7319	5483	7879	8162	21963	20407	8396	8584	10351	111050	5684.24	integral membrane protein CcmA involved in cell shape determination
COG1665	40	0	1	3	20	46	40	277	26	63	31	547	78.0129	DNA polymerase beta domain protein region
COG1666	27744	13195	11637	11407	48755	46413	17968	19308	36818	30234	43783	307262	14283.3	UPF0234 protein
COG1667	0	0	0	0	0	0	0	0	0	0	0	0	0	Uncharacterized protein conserved in archaea (DUF2226)
COG1668	4297	5480	6917	6292	5202	8862	21001	19619	4017	4928	4849	91464	6090.08	(ABC) transporter
COG1669	6019	2850	12149	7283	6947	15391	37319	33142	6574	7482	7371	142527	11524.1	DNA polymerase beta domain protein region
COG1670	44627	32390	38729	44505	48806	61973	79511	75414	42730	48171	52689	569545	14786.7	#NAME?
COG1671	4108	4807	7961	9636	4131	3731	10654	10753	4462	4778	5768	70789	2771.08	UPF0178 protein
COG1672	49	13	107	79	19	73	300	382	27	21	53	1123	122.965	Archaeal ATPase
COG1673	0	0	0	0	0	0	0	0	0	0	0	0	0	UPF0310 protein
COG1674	18369	11854	18899	17670	21128	29265	42259	40896	16131	19853	22880	259204	9891.61	cell division protein FtsK
COG1675	3	1	5	0	2	7	45	0	0	0	0	63	13.237	Transcription factor that plays a role in the activation of archaeal genes transcribed by RNA polymerase. Facilitates transcription initiation by enhancing TATA-box recognition by TATA-box-binding protein (Tbp), and transcription factor B (Tfb) and RNA polymerase recruitment. Not absolutely required for transcription in vitro, but particularly important in cases where Tbp or Tfb function is not o…
COG1676	0	6	8	20	4	9	26	18	4	3	4	102	8.31975	sites to release the intron. The products are an intron and two tRNA half-molecules bearing 2',3' cyclic phosphate and 5'-OH termini. Recognizes a pseudosymmetric substrate in which 2 bulged loops of 3 bases are separated by a stem of 4 bp (By similarity)
COG1677	4610	3756	7031	8026	4593	4765	20975	20493	5338	5223	6286	91096	6275.4	flagellar hook-basal body complex protein fliE
COG1678	8718	5574	7272	9798	9253	8309	9397	8780	8092	9298	10330	94821	1314.6	UPF0301 protein
COG1679	333	72	66	45	358	78	222	207	363	377	522	2643	161.3	Aconitase subunit 1
COG1680	35124	20695	31019	40171	37470	52471	73400	70430	30701	36391	39262	467134	16473.4	Beta-lactamase
COG1681	0	16	26	40	6	10	76	27	8	4	4	217	22.3342	K07325 archaeal flagellin FlaB
COG1682	33387	15038	15046	18131	54967	53088	32031	29455	43161	37033	49285	380622	14568.1	ABC-2 type transporter
COG1683	896	2623	6788	6717	1027	1517	6611	7626	1187	1176	1361	37529	2840.79	conserved protein
COG1684	6673	4180	6824	7855	7231	8033	20102	19909	6268	7399	8371	102845	5386.07	Role in flagellar biosynthesis (By similarity)
COG1685	0	0	0	0	0	0	0	0	0	0	0	0	0	shikimate kinase
COG1686	23058	16167	24335	25283	25814	25954	31814	28913	19954	23549	29445	274286	4392.15	Carboxypeptidase
COG1687	20	1	4	24	7	4	7	191	14	11	9	292	54.9861	Branched-chain amino acid
COG1688	17	64	270	98	176	528	1158	377	159	138	99	3084	326.99	crispr-associated protein cas5
COG1689	0	0	0	0	0	0	0	0	0	0	0	0	0	NA
COG1690	2669	1530	6961	4019	2786	6002	19959	18415	3456	3375	3725	72897	6398.86	Catalytic subunit of the tRNA-splicing ligase complex that acts by directly joining spliced tRNA halves to mature-sized tRNAs by incorporating the precursor-derived splice junction phosphate into the mature tRNA as a canonical 3',5'- phosphodiester. May act as a RNA ligase with broad substrate specificity, and may function toward other RNAs (By similarity)
COG1691	20110	7562	4032	2928	40396	36943	10448	10665	31398	22586	33919	220987	13830.6	1-(5-phosphoribosyl)-5-amino-4-imidazole- carboxylate (AiR) carboxylase
COG1692	10817	3850	4329	1713	11830	12918	12611	13253	8988	11366	14488	106163	4362.13	metallophosphoesterase
COG1693	0	0	64	0	0	0	351	0	0	0	0	415	105.66	Domain of unknown function DUF128
COG1694	18409	9088	1357	774	38034	31171	2409	1690	29938	20560	32033	185463	14383.9	MazG family
COG1695	11673	10800	20172	20554	13292	24259	31068	29986	11251	12941	13125	199121	7574.18	Transcriptional regulator
COG1696	3510	1403	3116	2100	3455	5058	10104	9601	4119	3984	4572	51022	2779.95	Membrane bOund o-acyl transferase mboat family protein
COG1697	0	6	8	14	2	4	26	9	2	2	2	75	7.57388	DNA topoisomerase VI, subunit A
COG1698	0	6	8	14	2	4	26	9	2	2	2	75	7.57388	UPF0147 protein
COG1699	2665	1081	4045	2858	3279	4809	11314	11428	2189	2935	2727	49330	3534.19	Binds to the C-terminal region of flagellin, which is implicated in polymerization, and participates in the assembly of the flagellum (By similarity)
COG1700	3	8	2	2	4	46	40	255	15	37	29	441	73.2072	Protein of unknown function (DUF524)
COG1701	0	6	8	14	2	4	26	9	2	2	2	75	7.57388	ligase activity
COG1702	35768	17079	15168	14192	57248	52449	29889	32077	45650	38211	54965	392696	15808.5	Phoh family
COG1703	4772	4419	7041	5751	5475	9198	17878	20413	5527	5509	5486	91469	5533.86	lAO AO transport system ATPase
COG1704	7649	8243	16737	18302	8653	12111	25579	24540	6442	8061	8176	144493	7034.9	LemA family
COG1705	2065	3523	1308	3743	1918	1567	2968	3032	2099	2138	2449	26810	785.117	flagellar rod assembly protein muramidase flgj
COG1706	4420	3438	5394	6676	4455	4530	16424	16338	4808	5095	6203	77781	4686.47	Assembles around the rod to form the L-ring and probably protects the motor basal body from shearing forces during rotation (By similarity)
COG1707	0	0	0	0	1	0	1	4	0	0	0	6	1.21356	Amino acid-binding act domain protein
COG1708	98	1750	515	478	407	1096	2317	1283	356	322	227	8849	714.884	DNA polymerase beta domain protein region
COG1709	22	45	14	141	6	11	72	15	6	6	6	344	41.8356	Transcriptional regulator (XRE family
COG1710	2	0	1	2	10	7	45	6	29	16	14	132	13.8852	NA
COG1711	0	0	0	0	0	0	0	0	0	0	0	0	0	NA
COG1712	139	1593	4518	5796	190	76	383	474	174	205	182	13730	1998.6	Specifically catalyzes the NAD or NADP-dependent dehydrogenation of L-aspartate to iminoaspartate (By similarity)
COG1713	316	359	21	122	240	904	36	54	468	443	516	3479	265.388	Metal Dependent Phosphohydrolase
COG1714	8600	8543	12422	13702	9712	14102	21697	22009	7689	9349	9798	137623	5079.74	rdd domain containing protein
COG1715	3455	1189	2058	3659	3955	5744	6413	5344	2998	3773	3239	41827	1548.04	restriction
COG1716	14094	8910	28017	19735	16810	36958	64308	65965	17084	18487	19300	309668	19688.3	fha domain-containing protein
COG1717	0	6	8	14	2	4	26	9	2	2	2	75	7.57388	(ribosomal) protein
COG1718	280	943	297	2608	261	196	639	1462	584	330	328	7928	731.672	serine threonine-protein kinase
COG1719	970	565	399	277	915	3335	1624	1308	1609	1495	1660	14157	846.356	4-vinyl reductase, 4VR
COG1720	1122	3728	9213	10567	1245	2054	12600	12443	1483	1369	1609	57433	4876.98	family UPF0066
COG1721	18581	15264	25192	21608	20345	33600	58132	59414	17072	21376	21750	312334	15764.1	Conserved protein
COG1722	8703	4716	7331	8120	9510	8074	22237	21615	10245	9253	12222	122026	5668.07	Bidirectionally degrades single-stranded DNA into large acid-insoluble oligonucleotides, which are then degraded further into small acid-soluble oligonucleotides (By similarity)
COG1723	183	70	414	1034	145	382	1439	1465	145	177	146	5600	537.178	Required for meiotic nuclear division 1 homolog (S. cerevisiae)
COG1724	1362	735	3535	2313	1091	2697	11113	10708	1377	1448	1557	37936	3774.28	ycfa family
COG1725	20671	9151	2410	2888	40934	37286	7358	6283	31843	22981	34494	216299	14708.4	Transcriptional regulator, GntR family
COG1726	2319	4137	1379	3274	2164	1642	2857	3255	2267	2546	2700	28540	781.848	NQR complex catalyzes the reduction of ubiquinone-1 to ubiquinol by two successive reactions, coupled with the transport of Na( ) ions from the cytoplasm to the periplasm. NqrA to NqrE are probably involved in the second step, the conversion of ubisemiquinone to ubiquinol (By similarity)
COG1727	0	6	8	14	2	4	26	9	2	2	2	75	7.57388	Ribosomal protein
COG1728	1	198	4	1	0	0	0	0	1	0	0	205	59.5	Protein of unknown function (DUF327)
COG1729	17210	12057	26951	20092	18126	25080	62855	68205	16272	18852	23223	308923	19014.6	tol-Pal system protein YbgF
COG1730	0	6	8	14	2	4	26	9	2	2	2	75	7.57388	Molecular chaperone capable of stabilizing a range of proteins. Seems to fulfill an ATP-independent, HSP70-like function in archaeal de novo protein folding (By similarity)
COG1731	0	6	8	14	2	4	26	9	2	2	2	75	7.57388	riboflavin synthase (EC 2.5.1.9)
COG1732	3083	1269	1349	3795	3531	5743	4558	4357	2698	3354	3170	36907	1315.05	(ABC) transporter
COG1733	24873	13015	26357	27456	28554	39414	39959	39712	19931	26371	28758	314400	8442.23	transcription, DNA-dependent
COG1734	18237	13163	22834	23908	20089	29356	51315	55826	15573	20672	22349	293322	14005.9	Transcription factor that acts by binding directly to the RNA polymerase (RNAP). Required for negative regulation of rRNA expression and positive regulation of several amino acid biosynthesis promoters
COG1735	50	79	225	146	268	633	1913	763	190	185	135	4587	545.042	phosphotriesterase-related protein
COG1736	0	6	8	14	2	4	26	9	2	2	2	75	7.57388	diphthamide biosynthesis protein
COG1737	8780	6080	2908	10125	9607	9075	8371	6518	8020	9532	10760	89776	2246.98	Transcriptional regulator
COG1738	9728	5187	5846	4821	10490	14019	16927	17565	7473	10106	12831	114993	4484.05	Membrane
COG1739	2699	5900	7917	10023	2649	2875	8443	10057	3069	3065	3297	59994	3089.02	protein family UPF0029, Impact, N-terminal protein
COG1740	783	1330	5433	3989	814	2843	16324	15841	978	919	1026	50280	5890.63	small subunit
COG1741	25515	17515	24571	29872	27900	30539	33241	35438	23090	26572	32624	306877	5177.21	pirin domain protein
COG1742	2889	2705	5306	7444	3393	4259	3396	3029	2368	2937	2716	40442	1500.42	UPF0060 membrane protein
COG1743	790	324	2237	1196	863	2195	7955	5421	1124	1048	1000	24153	2360.59	DNA methylase
COG1744	13637	4646	5169	4837	16020	15366	14986	14946	13871	14954	17705	136137	4929.86	basic membrane
COG1745	0	0	0	0	0	0	0	0	0	0	0	0	0	Uncharacterised protein family UPF0058
COG1746	0	6	8	14	2	4	26	11	4	2	2	79	7.54743	Catalyzes the addition and repair of the essential 3'- terminal CCA sequence in tRNAs without using a nucleic acid template. Adds these three nucleotides in the order of C, C, and A to the tRNA nucleotide-73, using CTP and ATP as substrates and producing inorganic pyrophosphate (By similarity)
COG1747	306	18	230	202	258	191	760	540	349	343	240	3437	195.717	Necessary for efficient RNA polymerase transcription elongation past template-encoded arresting sites. The arresting sites in DNA have the property of trapping a certain fraction of elongating RNA polymerases that pass through, resulting in locked ternary complexes. Cleavage of the nascent transcript by cleavage factors such as GreA or GreB allows the resumption of elongation from the new 3'termi…
COG1748	6435	3036	5720	5264	6795	5921	15486	18068	7891	6870	9170	90656	4527.36	saccharopine dehydrogenase
COG1749	4491	3597	6740	6598	4488	4799	19979	19052	4814	5149	6232	85939	5869.37	flagellar hook protein, FlgE
COG1750	0	0	64	0	0	0	351	0	0	0	0	415	105.66	Peptidase S16, lon domain protein
COG1751	291	11	221	191	229	143	717	528	308	312	211	3162	190.705	Pyruvate kinase, alpha/beta domain
COG1752	10247	13526	27852	33460	11154	17682	44619	45826	11725	11799	12643	240533	13740.8	K07001 NTE family protein
COG1753	0	0	0	0	0	0	0	0	0	0	0	0	0	Possibly the antitoxin component of a toxin-antitoxin (TA) module
COG1754	2	2	4	4	2	1	8	18	2	0	1	44	5.11859	Releases the supercoiling and torsional tension of DNA, which is introduced during the DNA replication and transcription, by transiently cleaving and rejoining one strand of the DNA duplex. Introduces a single-strand break via transesterification at a target site in duplex DNA. The scissile phosphodiester is attacked by the catalytic tyrosine of the enzyme, resulting in the formation of a DNA-(5'…
COG1755	53	204	73	35	61	40	279	219	53	70	62	1149	85.8118	isoprenylcysteine carboxyl methyltransferase
COG1756	0	6	8	14	2	4	26	9	2	2	2	75	7.57388	Methyltransferase involved in ribosomal biogenesis. Specifically catalyzes the N1-methylation of the pseudouridine corresponding to position 914 in M.jannaschii 16S rRNA (By similarity)
COG1757	3672	11215	11751	19892	3374	4616	15532	19421	3711	3992	4312	101488	6603.8	Na H antiporter
COG1758	14109	8393	12834	13023	15841	19358	23700	25847	11885	14983	18220	178193	5199.44	Promotes RNA polymerase assembly. Latches the N- and C- terminal regions of the beta' subunit thereby facilitating its interaction with the beta and alpha subunits (By similarity)
COG1759	0	0	0	0	0	0	0	0	0	0	0	0	0	Catalyzes the ATP- and formate-dependent formylation of 5-aminoimidazole-4-carboxamide-1-beta-d-ribofuranosyl 5'- monophosphate (AICAR) to 5-formaminoimidazole-4-carboxamide-1- beta-d-ribofuranosyl 5'-monophosphate (FAICAR) in the absence of folates (By similarity)
COG1760	2713	5273	2315	4809	2715	2413	6549	6151	3139	2964	3142	42183	1559.33	L-serine dehydratase
COG1761	0	6	8	14	2	4	26	9	2	2	2	75	7.57388	DNA-dependent RNA polymerase catalyzes the transcription of DNA into RNA using the four ribonucleoside triphosphates as substrates
COG1762	2863	6125	8518	8496	2813	4718	20430	22584	3468	3330	3560	86905	7051.57	PTS System
COG1763	5857	2291	4608	3733	6213	3618	13443	13687	6607	5932	8617	74606	3762.32	Molybdopterin-guanine dinucleotide biosynthesis protein
COG1764	10163	7476	9602	15079	11838	11988	15609	13369	9549	10168	11808	126649	2465.66	Organic hydroperoxide resistance protein
COG1765	44693	23482	18681	21386	86284	72665	28007	26777	68530	49544	73769	513818	24847.1	osmC family
COG1766	6673	4181	6824	7855	7231	8033	20103	19915	6268	7399	8371	102853	5387.35	The M ring may be actively involved in energy transduction (By similarity)
COG1767	69	2418	4945	5417	112	242	1686	574	53	81	47	15644	2016.3	triphosphoribosyl-dephospho-CoA synthase
COG1768	20	64	203	93	180	570	837	625	166	175	127	3060	269.429	Calcineurin-like phosphoesterase
COG1769	18	64	206	95	180	528	805	372	152	138	99	2657	237.41	CRISPR-associated protein Cmr3
COG1770	8513	6513	5456	6693	9410	15432	14466	16727	5317	9331	9896	107754	4036.55	Oligopeptidase b
COG1771	0	0	0	0	0	0	0	0	0	0	0	0	0	Protein of unknown function (DUF530)
COG1772	0	0	0	0	0	0	0	0	0	0	0	0	0	Protein of unknown function (DUF531)
COG1773	19392	8967	9263	9048	38828	33087	14274	15541	31440	21801	33313	234954	11076	rubredoxin
COG1774	1707	2477	4252	2449	1733	3293	12040	12063	2061	2042	2178	46295	3946.82	PSP1 C-terminal conserved region
COG1775	820	695	6254	3882	922	2921	18296	17972	1365	1234	1078	55439	6690.27	2-hydroxyglutaryl-CoA dehydratase
COG1776	1246	2934	1341	4010	1246	606	1728	1953	1385	1441	1450	19340	940.913	CheC --inhibitor of MCP methylation
COG1777	2299	580	1484	1262	2898	3645	4874	3856	1564	2396	2272	27130	1271.31	arsR family transcriptional regulator
COG1778	4506	6486	10471	11198	4039	5959	16489	17490	4379	4713	5598	91328	4914.17	3-deoxy-d-manno-octulosonate 8-phosphate phosphatase
COG1779	19	6	8	14	5	14	35	26	24	6	3	160	10.3573	zinc ion binding
COG1780	12	86	27	1232	15	24	46	295	24	8	11	1780	364.522	Probably involved in ribonucleotide reductase function (By similarity)
COG1781	311	918	739	261	244	150	749	567	340	323	223	4825	259.124	Involved in allosteric regulation of aspartate carbamoyltransferase (By similarity)
COG1782	8	12	13	38	13	8	39	30	8	2	4	175	13.3226	beta-lactamase domain protein
COG1783	1	90	3	169	0	0	2	135	1	1	1	403	63.355	phage terminase (large subunit)
COG1784	0	6	8	14	2	4	26	9	2	2	2	75	7.57388	integral membrane protein
COG1785	2549	3704	2765	6968	2404	2929	7319	8698	2957	2915	3286	46494	2269.76	alkaline phosphatase
COG1786	332	72	66	44	358	78	222	201	362	377	522	2634	161.421	UPF0107 protein
COG1787	11	230	12	11	13	2	17	42	14	7	10	369	65.9384	restriction endonuclease
COG1788	5304	11479	24399	32404	6195	8773	21674	20767	5989	6027	6002	149013	9545.66	Key enzyme for ketone body catabolism. Transfers the CoA moiety from succinate to acetoacetate. Formation of the enzyme-CoA intermediate proceeds via an unstable anhydride species formed between the carboxylate groups of the enzyme and substrate (By similarity)
COG1790	0	0	0	0	0	0	0	0	0	0	0	0	0	Protein of unknown function (DUF483)
COG1791	1565	790	82	432	1162	2037	143	254	860	1350	1891	10566	695.709	Catalyzes 2 different reactions between oxygene and the acireductone 1,2-dihydroxy-3-keto-5-methylthiopentene (DHK-MTPene) depending upon the metal bound in the active site. Fe-containing acireductone dioxygenase (Fe-ARD) produces formate and 2-keto-4- methylthiobutyrate (KMTB), the alpha-ketoacid precursor of methionine in the methionine recycle pathway. Ni-containing acireductone dioxygenase (N…
COG1792	33092	16813	16122	14696	54286	52328	32635	33042	42487	36193	51099	382793	14494.4	regulation of cell shape
COG1793	23971	10691	5082	7853	44863	41144	14504	14831	34595	26676	37985	262195	14191.1	DNA ligase
COG1794	5719	3364	4809	5810	6235	10546	14024	15681	3680	6611	7142	83621	4076.06	aspartate racemase
COG1795	528	85	634	443	416	617	2303	2314	545	604	435	8924	755.489	Formaldehyde-activating enzyme
COG1796	2986	922	3580	2087	3552	5037	10688	9266	2112	3174	2994	46398	3046.48	DNA polymerase
COG1797	21505	8280	4815	4694	41815	37983	13895	13377	32747	24256	35607	238974	13698	Responsible for the amidation of carboxylic groups at position A and C of either cobyrinic acid or hydrogenobrynic acid. NH(2) groups are provided by glutamine, and one molecule of ATP is hydrogenolyzed for each amidation (By similarity)
COG1798	0	6	8	14	2	4	26	9	2	2	2	75	7.57388	S-adenosyl-L-methionine-dependent methyltransferase that catalyzes the trimethylation of the amino group of the modified target histidine residue in translation elongation factor 2 (EF- 2), to form an intermediate called diphthine. The three successive methylation reactions represent the second step of diphthamide biosynthesis (By similarity)
COG1799	20282	7652	1229	1152	40168	36791	2144	2508	31373	22666	34224	200189	15737.7	Cell division protein that is part of the divisome complex and is recruited early to the Z-ring. Probably stimulates Z-ring formation, perhaps through the cross-linking of FtsZ protofilaments. Its function overlaps with FtsA (By similarity)
COG1800	0	0	0	0	0	0	0	0	0	0	0	0	0	NA
COG1801	5211	4030	7446	7761	5959	10097	21424	19827	5287	5919	6272	99233	5964.51	conserved protein
COG1802	28369	16767	27052	39974	32395	34977	47749	40377	25885	31018	33345	357908	8351.72	GntR Family Transcriptional Regulator
COG1803	2730	3708	3526	4549	2477	4191	8915	8462	2302	2781	3467	47108	2289.59	Methylglyoxal synthase
COG1804	29130	16868	34768	41636	34063	41293	60278	55488	27103	30907	34115	405649	12440.5	l-carnitine dehydratase bile acid-inducible protein F
COG1805	2625	4300	1397	3258	2399	2539	2883	3283	2733	2989	3213	31619	712.58	NQR complex catalyzes the reduction of ubiquinone-1 to ubiquinol by two successive reactions, coupled with the transport of Na( ) ions from the cytoplasm to the periplasm. NqrA to NqrE are probably involved in the second step, the conversion of ubisemiquinone to ubiquinol (By similarity)
COG1806	8712	7050	10426	11057	9402	13415	17577	17429	6433	9709	11385	122595	3695.76	Bifunctional serine threonine kinase and phosphorylase involved in the regulation of the pyruvate, phosphate dikinase (PPDK) by catalyzing its phosphorylation dephosphorylation (By similarity)
COG1807	69509	30707	32510	21668	132236	134029	97715	90098	105738	80581	115847	910638	40154.4	glycosyl transferase, family 39
COG1808	3986	3590	401	1417	3186	5485	2031	1873	2997	3827	5016	33809	1539.11	Membrane
COG1809	1523	889	431	927	1134	2098	250	1436	1313	1387	1864	13252	558.953	phosphosulfolactate synthase activity
COG1810	3	0	0	0	0	0	0	0	0	0	0	3	0.904534	Pfam:DUF166
COG1811	26	389	186	495	45	15	49	703	283	70	49	2310	230.818	Membrane
COG1812	289	17	230	251	237	148	758	600	322	320	218	3390	205.236	Catalyzes the formation of S-adenosylmethionine from methionine and ATP (By similarity)
COG1813	3983	2290	1552	908	4384	1797	4884	3561	4682	3745	5551	37337	1528.14	Factor 1
COG1814	5809	4433	8516	7956	6957	6975	12875	10683	5836	5635	7197	82872	2437.73	integral membrane protein
COG1815	6671	4180	6823	7850	7211	7987	19758	19903	6263	7396	8371	102413	5319.36	Structural component of flagellum, the bacterial motility apparatus. Part of the rod structure of flagellar basal body (By similarity)
COG1816	4583	5503	10002	13257	5417	8866	15131	16421	5045	5385	5230	94840	4446.7	adenosine deaminase
COG1817	287	256	1349	690	232	725	3532	4052	232	282	380	12017	1380.82	Protein of unknown function (DUF354)
COG1818	0	0	0	0	0	0	0	0	0	0	0	0	0	THUMP domain-containing protein
COG1819	7487	3979	7984	5694	8726	14172	21424	21390	6800	8455	8483	114594	5978.73	Transferase
COG1820	20854	10763	3974	4991	40977	35926	8488	8083	31743	23201	34643	223643	13775.8	GlcNAc 6-P deacetylase
COG1821	43	0	1	4	26	75	154	306	28	64	32	733	90.8727	ATP-grasp fold domain protein, DUF201-type
COG1822	0	0	0	0	0	0	0	0	0	0	0	0	0	Protein of unknown function DUF70
COG1823	14	2620	5363	6160	22	18	1313	1935	52	19	19	17535	2260.35	sodium dicarboxylate symporter
COG1824	0	6	8	14	3	4	26	13	2	2	2	80	7.72128	MgtE integral membrane region
COG1825	16093	10720	16296	14860	17707	22683	33938	34831	14189	17276	20686	219279	7809.07	This is one of the proteins that binds to the 5S RNA in the ribosome where it forms part of the central protuberance (By similarity)
COG1826	48984	28102	34219	30330	71871	75150	70735	71348	56392	53415	71694	612240	18121.9	Part of the twin-arginine translocation (Tat) system that transports large folded proteins containing a characteristic twin-arginine motif in their signal peptide across membranes. Together with TatC, TatB is part of a receptor directly interacting with Tat signal peptides. TatB may form an oligomeric binding site that transiently accommodates folded Tat precursor proteins before their translocat…
COG1827	1	198	4	71	1	0	0	7	2	0	0	284	60.8142	domain protein
COG1828	30183	11072	6061	3772	51370	48086	17452	17502	39116	32838	47490	304942	17483.4	phosphoribosylformylglycinamidine synthase
COG1829	0	6	8	14	2	4	26	9	2	2	2	75	7.57388	Ghmp kinase
COG1830	5760	1502	4517	3071	6932	6544	12392	13531	5956	5758	7368	73331	3561.63	Aldolase
COG1831	0	6	8	14	2	4	26	9	2	2	2	75	7.57388	TatD-related deoxyribonuclease
COG1832	9249	4486	9495	5402	10301	17726	26177	28072	6626	10486	11099	139119	7976.11	CoA-binding domain protein
COG1833	592	330	1776	978	636	1392	5054	4964	690	732	690	17834	1722.52	DNA-(Apurinic or apyrimidinic site) lyase (EC 4.2.99.18)
COG1834	6010	4583	5269	2093	6249	12485	14059	14590	3764	6882	7608	83592	4229.52	amidinotransferase
COG1835	25882	12135	13041	16587	46817	47285	31440	27482	37480	28810	39748	326707	12429.9	Acyltransferase
COG1836	17650	6973	3004	1461	37264	32024	8074	7476	29215	19828	31452	194421	13061.8	Integral membrane protein DUF92
COG1837	3136	2018	8032	5091	3928	9183	21889	22685	3180	3833	3893	86868	7428.24	UPF0109 protein
COG1838	2203	1868	6062	5795	2359	3203	19011	18918	2734	2759	3000	67912	6470.05	fumarate
COG1839	311	95	2124	1328	411	894	6902	4980	472	455	315	18287	2234.16	Adenosine specific kinase
COG1840	33843	16637	11148	11467	55535	52245	27737	28219	43348	37691	52410	370280	16246.3	extracellular solute-binding protein, family 1
COG1841	8817	8014	12940	13913	9562	11887	25152	24695	8565	9627	10920	144092	6131.57	ribosomal large subunit biogenesis
COG1842	6570	4576	3441	8040	6972	10355	10484	9430	5871	7254	7903	80896	2233.46	Phage shock protein A
COG1843	10188	7183	22976	16007	10063	16747	62542	68673	9094	10852	12997	247322	21811.4	Flagellar hook capping protein
COG1844	0	0	0	0	0	0	0	0	0	0	0	0	0	Protein of unknown function (DUF356)
COG1845	36062	16219	15945	17848	56832	55629	35601	36229	44550	39162	54507	408584	15341.7	Cytochrome C Oxidase, Subunit III
COG1846	62563	42744	70186	78633	72360	106907	145230	138353	54136	67365	69608	908085	33312.9	Transcriptional regulator
COG1847	2769	1447	4780	3373	3509	7296	13096	12910	2672	3294	3230	58376	4078.38	Single-stranded nucleic acid binding R3H domain-containing protein
COG1848	3391	1235	4466	2638	4149	7437	14227	13000	2865	3957	3814	61179	4266.27	Toxic component of a toxin-antitoxin (TA) module. A
COG1849	0	6	8	14	2	4	26	9	2	2	2	75	7.57388	Cytidyltransferase-related domain protein
COG1850	17718	6896	1067	406	37424	31817	3210	2207	29427	19941	31480	181593	14309.4	RuBisCO catalyzes two reactions the carboxylation of D- ribulose 1,5-bisphosphate, the primary event in carbon dioxide fixation, as well as the oxidative fragmentation of the pentose substrate
COG1851	0	0	0	0	0	0	0	0	0	0	0	0	0	UPF0128 protein
COG1852	306	18	686	540	258	196	2422	1688	350	343	240	7047	738.901	Protein of unknown function DUF116
COG1853	69069	34613	35465	40797	129623	112804	39609	37785	103632	76278	113997	793672	37016.8	flavin reductase domain protein, FMN-binding
COG1854	52	3205	525	2279	26	42	64	220	51	28	22	6514	1092.96	Involved in the synthesis of autoinducer 2 (AI-2) which is secreted by bacteria and is used to communicate both the cell density and the metabolic potential of the environment. The regulation of gene expression in response to changes in cell density is called quorum sensing. Catalyzes the transformation of S-ribosylhomocysteine (RHC) to homocysteine (HC) and 4,5- dihydroxy-2,3-pentadione (DPD) (B…
COG1855	0	6	8	14	2	4	26	9	2	2	2	75	7.57388	K06865 ATPase
COG1856	0	6	8	14	2	4	26	9	2	2	2	75	7.57388	Elp3
COG1857	305	81	500	302	407	674	1900	915	469	451	312	6316	490.114	CRISPR-associated autoregulator DevR family
COG1858	7901	4308	8795	7541	7896	9861	27524	23996	9376	9398	9644	126240	7270.7	cytochrome C peroxidase
COG1859	105	78	57	164	106	115	157	102	180	130	171	1365	39.906	Removes the 2'-phosphate from RNA via an intermediate in which the phosphate is ADP-ribosylated by NAD followed by a presumed transesterification to release the RNA and generate ADP- ribose 1''-2''-cyclic phosphate (APPR P). May function as an ADP- ribosylase (By similarity)
COG1860	0	6	8	14	2	4	26	9	2	2	2	75	7.57388	UPF0179 protein
COG1861	430	51	333	272	330	286	1130	1004	416	411	297	4960	322.748	Acylneuraminate cytidylyltransferase
COG1862	15719	10148	14090	13601	17270	19927	27572	30168	13462	16676	20054	198687	6098.76	preprotein translocase, yajc subunit
COG1863	8690	5317	11304	12014	9835	9593	18115	17998	8638	9148	11729	122381	3886.54	monovalent cation H antiporter subunit E
COG1864	973	1877	5038	6490	875	672	2063	2329	934	1014	1122	23387	1905.4	DNA RNA NON-specific endonuclease
COG1865	48	125	2608	2563	85	573	7868	6806	92	79	60	20907	2867.63	adenosylcobinamide hydrolase activity
COG1866	3813	4903	6408	7038	3822	5485	18577	19512	4131	4355	4786	82830	5787.2	Phosphoenolpyruvate Carboxylase
COG1867	1378	493	40	24	1016	1999	38	46	698	1187	1706	8625	722.478	Dimethylates a single guanine residue at position 26 of a number of tRNAs using S-adenosyl-L-methionine as donor of the methyl groups (By similarity)
COG1868	6616	4154	6829	7836	7145	8019	20122	19917	6194	7288	8270	102390	5411.2	FliM is one of three proteins (FliG, FliN, FliM) that forms the rotor-mounted switch complex (C ring), located at the base of the basal body. This complex interacts with the CheY and CheZ chemotaxis proteins, in addition to contacting components of the motor that determine the direction of flagellar rotation (By similarity)
COG1869	24	909	511	277	22	19	90	87	32	12	12	1995	286.481	Catalyzes the interconversion of beta-pyran and beta- furan forms of D-ribose (By similarity)
COG1871	1505	2335	3556	3030	1593	1974	9652	10420	1871	1875	1892	39703	3240.5	Probably deamidates glutamine residues to glutamate on methyl-accepting chemotaxis receptors (MCPs), playing an important role in chemotaxis (By similarity)
COG1872	1436	2233	4635	2786	1461	3692	15176	11867	1846	1701	1700	48533	4671.77	UPF0235 protein
COG1873	1432	926	116	72	1088	2049	372	257	782	1275	1786	10155	675.674	sporulation protein, YlmC YmxH family
COG1874	3028	1212	1481	1908	3997	6049	5441	3866	2526	3484	3350	36342	1525.2	beta-galactosidase
COG1875	5303	3876	5898	6505	5568	9419	14885	16209	4410	5482	6150	83705	4178.85	Phoh family
COG1876	21047	10849	2349	3061	40898	36729	4357	5528	32038	23354	34949	215159	14938.4	Carboxypeptidase
COG1877	2920	2568	7474	8292	3482	5611	9878	8369	2453	3033	2857	56937	2821.87	trehalose biosynthetic process
COG1878	10067	3993	10313	9639	12118	17869	31385	29488	8913	11051	10953	155789	8674.19	Cyclase family
COG1879	26611	14788	17291	15420	31544	36830	43484	44658	26395	29644	34349	321014	10427.8	Periplasmic binding protein LacI transcriptional regulator
COG1880	0	0	0	0	0	0	0	0	0	0	0	0	0	Part of a complex that catalyzes the reversible cleavage of acetyl-CoA, allowing autotrophic growth from CO(2). Probably has a structural role in stabilizing the alpha-epsilon subcomponent of the ACDS complex by forming a structural link between the two alpha subunits (By similarity)
COG1881	3742	3272	7230	6595	4399	7424	20067	19253	3325	4074	4258	83639	6149.27	phosphatidylethanolamine-binding protein
COG1882	485	1715	1098	637	390	1072	1945	2133	744	569	646	11434	618.976	formate acetyltransferase
COG1883	1820	3326	5831	5704	1915	3375	14209	15363	2130	2149	2262	58084	4913.79	decarboxylase beta subunit
COG1884	14728	8203	12937	10435	16639	24211	35496	36866	14153	15951	17098	206717	9512.72	methylmalonyl-coA mutase
COG1885	0	0	0	0	0	0	0	0	0	0	0	0	0	UPF0212 protein
COG1886	7713	4357	7141	8449	8320	9044	21588	21255	7439	8514	9687	113507	5657.68	Flagellar motor switch protein
COG1887	589	1374	2273	3497	540	2334	8555	7134	546	525	583	27950	2816.85	CDP-glycerol poly(glycerophosphate) glycerophosphotransferase
COG1888	0	6	8	14	2	4	26	9	2	2	2	75	7.57388	Uncharacterized ArCR, COG1888
COG1889	0	6	8	14	2	4	26	9	2	2	2	75	7.57388	Involved in pre-rRNA and tRNA processing. Utilizes the methyl donor S-adenosyl-L-methionine to catalyze the site-specific 2'-hydroxyl methylation of ribose moieties in rRNA and tRNA. Site specificity is provided by a guide RNA that base pairs with the substrate. Methylation occurs at a characteristic distance from the sequence involved in base pairing with the guide RNA (By similarity)
COG1890	0	6	8	14	2	4	26	9	2	2	2	75	7.57388	Ribosomal protein
COG1891	44	0	2	6	26	76	159	307	28	65	32	745	91.397	UPF0264 protein
COG1892	288	11	221	191	229	143	717	528	308	312	211	3159	190.702	Catalyzes the irreversible beta-carboxylation of phosphoenolpyruvate (PEP) to form oxaloacetate (OAA), a four- carbon dicarboxylic acid source for the tricarboxylic acid cycle (By similarity)
COG1893	11326	5103	7475	8645	13186	11870	24585	21142	11917	12205	15330	142784	5689.48	Catalyzes the NADPH-dependent reduction of ketopantoate into pantoic acid (By similarity)
COG1894	27209	11626	25904	19119	30685	39601	62693	65157	23010	28957	34150	368111	16772.6	Nadh dehydrogenase
COG1895	9	0	64	5	10	0	351	3	22	12	20	496	103.041	hepn domain protein
COG1896	3357	2545	3870	5236	3455	3311	11384	11922	3549	4027	4048	56704	3281.2	Metal Dependent Phosphohydrolase
COG1897	17876	8044	1564	2050	37476	30406	4036	3574	29138	19930	31450	185544	13618.3	Homoserine O-transsuccinylase
COG1898	12924	9142	16578	14516	13164	24345	35475	36432	9465	14159	15321	201521	9595.83	DTDP-4-dehydrorhamnose 3,5-epimerase
COG1899	5839	4370	5600	2286	6380	12999	16057	16989	3916	7016	7502	88954	4973.94	deoxyhypusine synthase
COG1900	328	158	408	340	248	909	1368	1196	478	449	518	6400	397.368	Methanogenesis marker 16 metalloprotein
COG1901	66	884	532	84	24	93	163	357	42	39	35	2319	274.729	Specifically catalyzes the N1-methylation of pseudouridine at position 54 (Psi54) in tRNAs (By similarity)
COG1902	15372	21179	40916	56087	16938	23073	45610	46187	16981	17679	18710	318732	15010	NADH flavin oxidoreductase, NADH oxidase
COG1903	21007	7671	3795	2463	41304	37377	10283	9766	31884	23672	35034	224256	14343	May catalyze the methylation of C-1 in cobalt-precorrin- 5 and the subsequent extrusion of acetic acid from the resulting intermediate to form cobalt-precorrin-6A (By similarity)
COG1904	224	130	94	147	277	359	1963	540	277	164	173	4348	535.071	Uronic isomerase
COG1905	16836	8301	23257	16624	18553	26258	56046	56679	15145	18366	21592	277657	16066.6	Nadh dehydrogenase
COG1906	3	6	72	14	2	4	376	9	2	2	2	492	111.762	Protein of unknown function (DUF401)
COG1907	44	0	2	6	26	76	159	307	28	65	32	745	91.397	beta-ribofuranosylaminobenzene 5-phosphate synthase
COG1908	831	1210	8785	5356	1034	4307	24940	26322	1408	1359	1430	76982	9537.37	Methyl-viologen-reducing hydrogenase, delta subunit
COG1909	0	6	8	14	2	4	26	9	2	2	2	75	7.57388	UPF0218 protein
COG1910	483	767	1806	2423	542	488	6253	4894	576	628	736	19596	1997.39	NA
COG1911	0	6	8	14	2	4	26	9	2	2	2	75	7.57388	(ribosomal) protein
COG1912	2181	2518	5688	3222	2192	4616	16394	15727	2723	2720	2919	60900	5312.39	conserved protein
COG1913	128	336	2457	1500	307	1225	7071	7678	457	403	452	22014	2747.39	zinc metalloprotease whose natural substrate is
COG1914	21767	10692	4060	7508	41643	36065	10343	9590	32534	23913	35362	233477	13490.4	H( )-stimulated, divalent metal cation uptake system (By similarity)
COG1915	337	347	648	795	280	920	1742	1856	748	513	562	8748	535.862	LOR SDH bifunctional protein conserved domain protein
COG1916	113	441	2311	2532	188	1151	6469	7226	267	257	289	21244	2580.21	traB family
COG1917	15698	6919	20281	15349	18335	30397	59941	56946	13537	17423	17768	272594	17562.5	Cupin 2 Conserved Barrel Domain Protein
COG1918	3308	7698	16673	15656	3369	5744	22652	21781	4355	3974	4336	109546	7666.75	ferrous iron transport protein
COG1920	2390	1144	2767	2741	3164	5306	7730	6996	2336	2650	2426	39650	2109.41	Guanylyltransferase that catalyzes the activation of 2- phospho-L-lactate (LP) as (2S)-lactyl-2-diphospho-5'-guanosine (LPPG), via the condensation of LP with GTP. Is involved in the biosynthesis of coenzyme F420, a hydride carrier cofactor (By similarity)
COG1921	2444	1570	3939	2515	3258	5232	11785	10852	1866	2789	2701	48951	3544.56	Converts seryl-tRNA(Sec) to selenocysteinyl-tRNA(Sec) required for selenoprotein biosynthesis (By similarity)
COG1922	6001	3610	4275	3836	6228	10794	12729	12034	5254	6662	7375	78798	3257.13	Glycosyl transferase, wecb taga cpsf family
COG1923	3813	4595	6388	9738	3777	2552	6953	6799	4015	4260	5340	58230	2029.09	RNA chaperone that binds small regulatory RNA (sRNAs) and mRNAs to facilitate mRNA translational regulation in response to envelope stress, environmental stress and changes in metabolite concentrations. Also binds with high specificity to tRNAs (By similarity)
COG1924	537	695	6313	3828	698	2812	18543	18382	1093	937	915	54753	6897.74	coA-substrate-specific enzyme activase
COG1925	5021	7229	11350	13269	5525	8662	18344	18995	4624	5434	5413	103866	5335.69	phosphocarrier protein (HPr)
COG1926	777	618	2701	2054	804	3024	7609	6325	1468	1137	1035	27552	2360.13	phosphoribosyltransferase
COG1927	0	0	0	0	0	0	0	0	0	0	0	0	0	Catalyzes the reversible reduction of methenyl- H(4)MPT( ) to methylene-H(4)MPT (By similarity)
COG1928	2668	997	1195	1979	3305	5935	3362	3287	2325	3002	2891	30946	1320.13	dolichyl-phosphate-mannose-protein mannosyltransferase activity
COG1929	2512	3986	6232	8294	3082	4613	2406	3557	2142	2619	2469	41912	1920.86	Glycerate kinase
COG1930	23	88	256	126	180	613	987	580	157	141	100	3251	300.356	Part of the energy-coupling factor (ECF) transporter complex CbiMNOQ involved in cobalt import (By similarity)
COG1931	0	6	8	14	2	4	26	9	2	2	2	75	7.57388	UPF0201 protein
COG1932	11351	8170	11301	12805	12622	11870	20215	20466	11644	11718	14758	146920	3786.37	Catalyzes the reversible conversion of 3- phosphohydroxypyruvate to phosphoserine and of 3-hydroxy-2-oxo-4- phosphonooxybutanoate to phosphohydroxythreonine (By similarity)
COG1933	0	6	8	14	2	4	26	9	2	2	2	75	7.57388	Possesses two activities a DNA synthesis (polymerase) and an exonucleolytic activity that degrades single stranded DNA in the 3'- to 5'-direction. Has a template-primer preference which is characteristic of a replicative DNA polymerase (By similarity)
COG1934	6165	5013	8224	10844	6306	6341	11987	11581	6483	6002	8426	87372	2474.03	lipopolysaccharide transport periplasmic protein lptA
COG1935	0	0	0	0	0	0	0	0	0	0	0	0	0	Protein of unknown function (DUF473)
COG1936	0	6	8	14	2	4	26	9	2	2	2	75	7.57388	adenylate kinase activity
COG1937	5820	6042	15056	16664	7327	10120	17716	17624	7429	6091	7740	117629	4996.38	Transcriptional repressor
COG1938	85	346	955	1003	107	1146	1993	2220	432	136	103	8526	766.648	ATP-grasp superfamily
COG1939	17340	6651	233	99	36856	30566	94	177	28835	19410	30975	171236	14627.7	Involved in correct processing of both the 5' and 3' ends of 23S rRNA precursor. Processes 30S rRNA precursor transcript even in absence of ribonuclease 3 (Rnc)
COG1940	31536	19028	27463	20077	36092	53634	69772	72322	26701	33873	36960	427458	18458.5	ROK family
COG1941	831	579	3756	1984	871	2693	11092	9927	1126	1040	1190	35089	3748.24	NADH ubiquinone oxidoreductase, 20 kda subunit
COG1942	964	785	224	1748	1074	757	3668	2100	1090	1025	1136	14571	920.32	4-oxalocrotonate tautomerase
COG1943	29299	15838	21519	14299	48002	52067	57627	58920	44140	33926	46490	422127	16266	transposase
COG1944	395	1075	2494	3570	542	1464	7301	8145	773	735	820	27314	2763.08	methanogenesis marker protein 1
COG1945	644	572	3402	1922	638	1980	9136	10279	792	832	852	31049	3519.47	Pyruvoyl-dependent arginine decarboxylase
COG1946	6360	8232	11312	20105	7512	9563	7776	9942	5299	6734	6521	99356	4075.64	acyl-CoA thioesterase
COG1947	32092	15302	16107	14761	53224	51080	32726	34315	41309	34987	49788	375691	14177.3	Catalyzes the phosphorylation of the position 2 hydroxy group of 4-diphosphocytidyl-2C-methyl-D-erythritol (By similarity)
COG1948	1	6	8	14	4	16	87	14	2	2	2	156	24.7662	Excision repair cross-complementing rodent repair deficiency, complementation group 4
COG1949	3524	4144	7140	9788	4036	5313	6343	7577	2953	3683	3680	58181	2159.51	3'-to-5' exoribonuclease specific for small oligoribonucleotides (By similarity)
COG1950	4322	3189	3260	2454	4709	8308	8968	8756	4035	4766	4950	57717	2333.38	Membrane
COG1951	5838	5889	12849	13836	6118	6950	25021	24670	6627	6623	8004	122425	7314.35	fumarate
COG1952	9182	7295	11398	11540	9913	14600	20240	22314	6980	10466	12049	135977	4921	One of the proteins required for the normal export of preproteins out of the cell cytoplasm. It is a molecular chaperone that binds to a subset of precursor proteins, maintaining them in a translocation-competent state. It also specifically binds to its receptor SecA (By similarity)
COG1953	6482	2953	3122	4563	7405	12926	8118	10415	2971	7136	7400	73491	3179.78	cytosine purines, uracil, thiamine, allantoin permease
COG1954	2	237	11	11	3	4	4	13	2	0	1	288	70.064	glycerol-3-phosphate responsive antiterminator
COG1955	0	12	17	33	6	12	51	28	6	4	5	174	15.5294	flagellar assembly protein J
COG1956	2836	4318	3506	5920	2755	2990	10428	9436	2896	3055	3510	51650	2754.23	gaf domain protein
COG1957	2554	2531	4217	5061	2758	3868	12366	11720	2976	3187	3158	54396	3593.93	nucleoside hydrolase
COG1958	0	12	17	33	6	12	51	28	6	4	5	174	15.5294	small nuclear ribonucleoprotein
COG1959	23126	16150	28506	28405	25380	35211	61171	59644	20881	25048	28742	352264	14855.8	Transcriptional regulator, BadM Rrf2 family
COG1960	110519	93831	187500	239330	128701	175098	237840	252788	102035	117386	125894	1770922	60067.2	acyl-CoA dehydrogenase
COG1961	29750	17248	23184	22747	50361	47201	50568	39803	41402	33658	45926	401848	11912.5	Resolvase
COG1962	0	0	0	0	0	0	0	0	0	0	0	0	0	Part of a complex that catalyzes the formation of methyl-coenzyme M and tetrahydromethanopterin from coenzyme M and methyl-tetrahydromethanopterin. This is an energy-conserving, sodium-ion translocating step. MtrH catalyzes the transfer of the methyl group from methyl-tetrahydromethanopterin to the corrinoid prosthetic group of MtrA
COG1963	17341	6872	235	51	36855	30565	99	195	28834	19415	30976	171438	14616.8	Acid phosphatase vanadium-dependent haloperoxidase related
COG1964	122	32	526	474	92	147	1999	1945	144	121	128	5730	734.392	radical SAM domain protein
COG1965	140	1514	518	1105	149	71	447	264	186	142	162	4698	466.093	frataxin-like protein
COG1966	3191	4816	7641	9570	3588	4668	9675	8654	2210	3202	3067	60282	2840.68	carbon starvation protein
COG1967	0	0	0	0	0	0	0	0	0	0	0	0	0	Membrane protein, conserved
COG1968	33142	17256	16225	15558	54343	52480	33089	33874	42584	36261	51154	385966	14329.7	Catalyzes the dephosphorylation of undecaprenyl diphosphate (UPP). Confers resistance to bacitracin (By similarity)
COG1969	514	1246	3650	1882	536	2280	10047	10885	646	635	764	33085	3814.26	Ni Fe-hydrogenase, b-type cytochrome subunit
COG1970	6499	6660	6838	7795	6552	10181	6922	5661	5392	6774	7369	76643	1261.14	Channel that opens in response to stretch forces in the membrane lipid bilayer. May participate in the regulation of osmotic pressure changes within the cell (By similarity)
COG1971	85	706	126	214	48	54	333	506	171	80	91	2414	212.987	Probably functions as a manganese efflux pump (By similarity)
COG1972	1961	4900	5450	5763	1880	4127	12883	13741	2256	2201	2529	57691	4241.28	)-nucleoside
COG1973	0	0	0	0	0	0	0	0	0	0	0	0	0	AIR synthase related protein
COG1974	58817	29426	30352	30041	100517	95861	56904	60591	78003	64655	93413	698580	26414.4	Represses a number of genes involved in the response to DNA damage (SOS response), including recA and lexA. In the presence of single-stranded DNA, RecA interacts with LexA causing an autocatalytic cleavage which disrupts the DNA-binding part of LexA, leading to derepression of the SOS regulon and eventually DNA repair (By similarity)
COG1975	11657	5181	9770	11881	13208	16785	29743	29298	11432	13081	14039	166075	7681.72	xanthine dehydrogenase
COG1976	0	6	8	14	2	4	26	9	2	2	2	75	7.57388	Binds to the 60S ribosomal subunit and prevents its association with the 40S ribosomal subunit to form the 80S initiation complex in the cytoplasm
COG1977	13409	5646	8202	8622	15315	17742	24442	21927	13586	14198	16853	159942	5704.59	Molybdopterin converting factor (Subunit 1)
COG1978	6	196	73	1	3	7	397	4	3	1	10	701	125.261	Protein of unknown function (DUF458)
COG1979	1225	3527	5659	7492	1158	778	2647	2574	1404	1295	1493	29252	2139.19	alcohol dehydrogenase
COG1980	27	16	15	16	17	35	106	37	29	49	30	377	26.0887	ec 3.1.3.11
COG1981	30168	14009	9131	11401	50685	45216	14775	15537	39795	33008	47956	311681	15920	Membrane
COG1982	17613	10869	1831	1883	37069	30780	2069	3277	29333	19674	31184	185582	13640.9	decarboxylase
COG1983	4791	6759	9674	13668	5729	8089	15689	14662	5106	5411	5475	95053	4151.7	phage shock protein C
COG1984	14647	7722	11825	12094	16420	18734	18950	21368	12503	15651	18914	168828	4054.36	Allophanate hydrolase subunit 2
COG1985	41666	16488	8064	9365	82050	74091	22886	22489	64080	46557	69345	457081	27388.6	Converts 2,5-diamino-6-(ribosylamino)-4(3h)-pyrimidinone 5'-phosphate into 5-amino-6-(ribosylamino)-2,4(1h,3h)- pyrimidinedione 5'-phosphate (By similarity)
COG1986	356	1942	3088	2955	279	1004	7380	7396	293	348	421	25462	2717.78	Phosphatase that hydrolyzes non-canonical purine nucleotides such as XTP and ITP to their respective diphosphate derivatives. Probably excludes non-canonical purines from DNA precursor pool, thus preventing their incorporation into DNA and avoiding chromosomal lesions
COG1987	6665	4143	6516	7793	7253	7842	19314	19333	6296	7472	8418	101045	5136.31	Flagellar biosynthetic protein fliq
COG1988	1204	896	468	2368	1152	968	1954	2206	1390	1339	1458	15403	575.321	Membrane-bound metal-dependent hydrolase
COG1989	29452	15252	15270	13649	50374	50525	28309	29579	38516	32024	46168	349118	13588	Cleaves type-4 fimbrial leader sequence and methylates the N-terminal (generally Phe) residue (By similarity)
COG1990	0	8	8	14	2	4	26	9	2	2	2	77	7.57628	The natural substrate for this enzyme may be peptidyl- tRNAs which drop off the ribosome during protein synthesis (By similarity)
COG1991	0	0	0	0	0	0	0	0	0	0	0	0	0	Class III signal peptide
COG1992	0	0	0	0	0	0	0	0	0	0	0	0	0	Phosphomethylpyrimidine kinase
COG1993	431	681	3035	2235	530	2610	8592	8624	828	591	587	28744	3105.05	Uncharacterized ACR, COG1993
COG1994	21389	9831	11280	8002	41640	40192	32288	28554	33078	24226	35465	285945	12075.7	metalloendopeptidase activity
COG1995	31226	16090	13662	12861	51847	47486	26796	27806	41235	34358	49501	352868	14254	Catalyzes the NAD(P)-dependent oxidation of 4- (phosphohydroxy)-L-threonine (HTP) into 2-amino-3-oxo-4- (phosphohydroxy)butyric acid which spontaneously decarboxylates to form 3-amino-2-oxopropyl phosphate (AHAP) (By similarity)
COG1996	0	0	0	0	0	0	0	0	0	0	0	0	0	DNA-dependent RNA polymerase catalyzes the transcription of DNA into RNA using the four ribonucleoside triphosphates as substrates
COG1997	0	11	17	27	4	7	51	18	5	3	3	146	14.9472	Ribosomal protein
COG1998	0	6	8	14	2	4	26	9	2	2	2	75	7.57388	30S ribosomal protein S27Ae
COG1999	11850	6988	10992	12620	12469	14466	33363	31336	11595	13038	14541	173258	8461.99	Electron transport protein SCO1 SenC
COG2000	6	23	47	27	3	87	181	186	5	2	1	568	70.0989	domain protein
COG2001	15727	7883	10929	8446	17401	21694	32495	32866	13627	16758	20117	197943	8479.7	Cell division protein mraZ
COG2002	620	1441	6035	3709	784	3311	18490	18290	1070	909	888	55547	6803.55	Transcriptional regulator AbrB family
COG2003	14679	11458	14967	15021	16020	17373	32021	27919	13357	16065	17778	196658	6295.84	DNA repair protein (RadC
COG2004	0	6	8	14	2	4	26	9	2	2	2	75	7.57388	40S ribosomal protein S24
COG2005	1104	896	1282	1301	1125	1124	6225	3662	1284	1205	1267	20475	1632.24	Transcriptional regulator, ModE family
COG2006	1444	1170	7887	4720	1601	5092	22456	22894	2283	2150	2164	73861	8144.96	iron-sulfur cluster-binding protein
COG2007	0	6	8	14	2	4	26	9	2	2	2	75	7.57388	40S ribosomal protein S8
COG2008	11068	6653	10250	8046	12486	20493	29555	29454	8371	12293	13196	161865	8166.67	Aldolase
COG2009	11976	7577	11625	10800	13092	14992	20828	20626	10297	12588	16096	150497	4153.91	succinate dehydrogenase, cytochrome
COG2010	33175	18594	12012	16210	53505	50844	40945	35910	44969	36349	50435	392948	14551.1	cytochrome c
COG2011	351	4481	9669	12404	336	345	1097	1404	374	409	408	31278	4271.93	ABC transporter (permease)
COG2012	0	6	8	14	2	4	26	9	2	2	2	75	7.57388	DNA-dependent RNA polymerase catalyzes the transcription of DNA into RNA using the four ribonucleoside triphosphates as substrates
COG2013	4379	2312	3455	2943	5094	6872	8866	9436	4138	4818	5011	57324	2294.6	conserved protein
COG2014	120	343	2334	1440	239	1246	6676	7237	308	311	323	20577	2607.87	Domain of unknown function (DUF364)
COG2015	657	3326	5197	5685	604	1029	2216	2048	572	609	620	22563	1901.37	Beta-lactamase domain protein
COG2016	0	6	8	14	2	4	26	9	2	2	2	75	7.57388	Rna-binding protein
COG2017	29364	13307	5147	6441	50148	41507	14813	14019	41281	31788	46298	294113	16598.7	converts alpha-aldose to the beta-anomer. It is active on D-glucose, L-arabinose, D-xylose, D-galactose, maltose and lactose (By similarity)
COG2018	5375	1888	6461	3833	6836	12382	18570	17380	4136	6086	5927	88874	5541.37	Roadblock lc7 family protein
COG2019	1	6	8	16	6	4	34	52	10	8	6	151	15.4796	adenylate kinase
COG2020	25036	12165	14693	15721	45141	42609	27814	29363	36646	28190	39809	317187	11415.3	isoprenylcysteine carboxyl methyltransferase
COG2021	13335	6951	14287	13854	15151	21334	29394	30478	11383	14182	16760	187109	7271.11	homoserine O-acetyltransferase
COG2022	26055	15083	14437	13853	46547	47917	27697	28868	34759	29084	41062	325362	12191.5	Catalyzes the rearrangement of 1-deoxy-D-xylulose 5- phosphate (DXP) to produce the thiazole phosphate moiety of thiamine. Sulfur is provided by the thiocarboxylate moiety of the carrier protein ThiS. In vitro, sulfur can be provided by H(2)S (By similarity)
COG2023	0	6	8	14	2	4	26	9	2	2	2	75	7.57388	tRNA 5'-leader removal
COG2024	0	0	0	0	0	0	0	0	0	0	0	0	0	Catalyzes the attachment of O-phosphoserine (Sep) to tRNA(Cys) (By similarity)
COG2025	15751	10389	17409	17594	17630	23110	38365	39984	14192	17063	20494	231981	9510.01	Electron transfer flavoprotein
COG2026	3767	3439	9158	6286	4407	9071	23304	22560	3770	4378	4063	94203	7391.05	Addiction module toxin, RelE StbE family
COG2027	21656	9973	7791	5874	41417	39496	19565	21927	32595	24127	35720	260141	12533.5	D-alanyl-D-alanine carboxypeptidase
COG2028	0	0	0	0	0	0	0	0	0	0	0	0	0	Domain of unknown function (DUF365)
COG2029	0	0	0	0	0	0	0	0	0	0	0	0	0	Domain of unknown function (DUF366)
COG2030	21544	12149	23819	29554	25946	39152	44194	46509	18087	23068	22214	306236	10963.7	maoc domain protein dehydratase
COG2031	200	2373	4461	8130	185	104	365	828	210	199	194	17249	2561.36	Short chain fatty acid transporter
COG2032	2515	4255	5621	8629	2092	3379	4054	3917	1850	2379	3001	41692	1952.57	Destroys radicals which are normally produced within the cells and which are toxic to biological systems (By similarity)
COG2033	383	331	2453	1586	426	1283	6935	7391	644	573	510	22515	2612.6	Superoxide reductase
COG2034	0	6	8	14	2	4	26	9	2	2	2	75	7.57388	Protein of unknown function DUF131
COG2035	2712	3754	1080	1640	2786	1974	1834	1495	2909	3022	3375	26581	855.227	Membrane
COG2036	0	1	0	6	2	6	0	10	2	2	2	31	3.18805	Core component of nucleosome. Nucleosomes wrap and compact DNA into chromatin, limiting DNA accessibility to the cellular machineries which require DNA as a template. Histones thereby play a central role in transcription regulation, DNA repair, DNA replication and chromosomal stability. DNA accessibility is regulated via a complex set of post-translational modifications of histones, also called h…
COG2037	44	0	2	6	26	76	159	307	28	65	32	745	91.397	Catalyzes the transfer of a formyl group from 5-formyl tetrahydromethanopterin (5-formyl-H(4)MPT) to methanofuran (MFR) so as to produce formylmethanofuran (formyl-MFR) and tetrahydromethanopterin (H(4)MPT)
COG2038	21772	11625	11323	11694	42030	38932	18198	17948	33280	24486	35859	267147	11465.9	Catalyzes the synthesis of alpha-ribazole-5'-phosphate from nicotinate mononucleotide (NAMN) and 5,6- dimethylbenzimidazole (DMB) (By similarity)
COG2039	418	992	493	1550	451	1089	2944	2324	648	577	628	12114	840.724	Removes 5-oxoproline from various penultimate amino acid residues except L-proline (By similarity)
COG2040	10719	3716	3514	3200	11781	13084	9643	11617	9059	11462	14699	102494	4046.24	Homocysteine s-methyltransferase
COG2041	17563	7686	12094	10575	20271	31059	37744	35312	14009	19889	20887	227089	10063.4	The exact function is not known. Can catalyze the reduction of a variety of substrates like dimethyl sulfoxide, trimethylamine N-oxide, phenylmethyl sulfoxide and L-methionine sulfoxide. Cannot reduce cyclic N-oxides. Shows no activity as sulfite oxidase (By similarity)
COG2042	0	6	8	14	2	4	26	9	2	2	2	75	7.57388	pre-rRNA processing protein involved in ribosome biogenesis (By similarity)
COG2043	180	325	2366	1419	252	1245	6935	7379	331	342	349	21123	2677.56	Uncharacterised ArCR, COG2043
COG2044	2449	1087	1408	1993	3015	4567	2566	3747	2284	2618	2421	28155	978.447	DsrE family
COG2045	20345	7434	2644	1428	40329	37192	6625	6333	31054	22614	34194	210192	14833.9	2-phosphosulfolactate phosphatase
COG2046	18715	7204	2619	1462	38252	32411	7457	7215	30293	21100	32668	199396	13594.6	Catalyzes the first intracellular reaction of sulfate assimilation, forming adenosine-5'-phosphosulfate (APS) from inorganic sulfate and ATP. Plays an important role in sulfate activation as a component of the biosynthesis pathway of sulfur- containing amino acids (By similarity)
COG2047	2	18	1242	685	3	212	3652	2919	4	2	2	8741	1302.65	PAC2 family
COG2048	719	741	4065	2413	677	2812	11472	12138	1060	1009	1213	38319	4252.57	heterodisulfide reductase
COG2049	14511	5817	6407	5976	16284	17590	16963	19048	12044	15488	18747	148875	5175.07	Allophanate hydrolase, subunit 1
COG2050	30966	24682	43461	52880	34877	47700	65198	68858	25839	32691	36456	463608	15044	thioesterase Superfamily protein
COG2051	0	6	8	14	2	4	26	9	2	2	2	75	7.57388	40s ribosomal protein S27
COG2052	317	352	471	338	236	905	1694	1178	466	443	514	6914	449.929	UPF0296 protein
COG2053	0	6	8	14	2	4	26	9	2	2	2	75	7.57388	Ribosomal protein
COG2054	44	0	2	6	26	76	159	307	28	65	32	745	91.397	Aspartate glutamate uridylate kinase
COG2055	15556	5938	8231	4069	17216	22417	23720	25174	11344	16952	20559	171176	7292.58	malate L-lactate dehydrogenase
COG2056	120	3356	4996	8323	101	55	147	446	130	114	122	17910	2768.16	Na H antiporter
COG2057	5292	11476	24395	32416	6211	8870	22749	20819	5953	5981	5971	150133	9651.93	Key enzyme for ketone body catabolism. Transfers the CoA moiety from succinate to acetoacetate. Formation of the enzyme-CoA intermediate proceeds via an unstable anhydride species formed between the carboxylate groups of the enzyme and substrate (By similarity)
COG2058	0	6	8	14	2	4	26	9	2	2	2	75	7.57388	Ribosomal protein
COG2059	3526	7092	11895	16980	3351	5552	9560	7891	3758	3904	4479	77988	4298.38	Chromate
COG2060	270	1818	5918	6276	311	1598	5808	4778	396	246	240	27659	2602.48	One of the components of the high-affinity ATP-driven potassium transport (or KDP) system, which catalyzes the hydrolysis of ATP coupled with the exchange of hydrogen and potassium ions (By similarity)
COG2061	0	0	0	0	0	0	0	0	0	0	0	0	0	Amino acid-binding act domain protein
COG2062	18239	9705	14007	13398	19685	24726	26687	28266	15702	19491	23739	213645	5942.29	phosphohistidine phosphatase activity
COG2063	4424	3441	5396	6684	4457	4532	16450	16370	4806	5098	6200	77858	4697.2	Assembles around the rod to form the L-ring and probably protects the motor basal body from shearing forces during rotation (By similarity)
COG2064	3299	1745	4786	4674	4100	7499	14720	13692	3191	3758	3403	64867	4350.17	type ii secretion system
COG2065	22967	8717	6047	4157	43068	39368	16203	16348	34161	25558	37543	254137	13964.4	Also displays a weak uracil phosphoribosyltransferase activity which is not physiologically significant (By similarity)
COG2066	4459	2666	1180	3479	4889	5400	3736	3288	3641	4727	4887	42352	1214.01	Glutaminase
COG2067	6083	17015	30717	31375	5555	8811	33423	35888	6209	6520	7264	188860	12881.2	lipid transport
COG2068	4047	2108	6829	6953	4884	8718	20785	20965	4069	4673	4695	88726	6572.51	4-diphosphocytidyl-2c-methyl-d-erythritol synthase
COG2069	305	22	1532	876	244	355	4762	3636	334	324	214	12604	1584.65	Part of a complex that catalyzes the reversible cleavage of acetyl-CoA, allowing autotrophic growth from CO(2). Probably maintains the overall quaternary structure of the ACDS complex (By similarity)
COG2070	14471	12057	19708	24702	16579	22822	37912	37274	14144	15600	16779	232048	8975.44	2-Nitropropane dioxygenase
COG2071	9729	3325	3731	5341	11176	9584	12283	9287	10012	10061	12558	97087	3229.56	Glutamine amidotransferase
COG2072	24733	16817	35701	41209	28076	41180	40028	45502	19722	25613	28078	346659	9657.07	Monooxygenase
COG2073	18428	7099	2584	1872	38137	32316	7025	7515	30110	20958	32573	198617	13510.6	cobalamin (vitamin B12) biosynthesis CbiG protein
COG2074	0	0	0	0	1	0	1	4	0	0	0	6	1.21356	2-Phosphoglycerate kinase
COG2075	0	6	8	14	2	4	26	9	2	2	2	75	7.57388	Ribosomal protein
COG2076	21500	16421	26466	27626	23402	33479	38445	39899	16300	23117	27170	293825	7898.21	Multidrug Resistance protein
COG2077	2315	4210	4714	5462	2408	3560	12129	13157	2633	2757	3095	56440	3851.68	Has antioxidant activity. Could remove peroxides or H(2)O(2) (By similarity)
COG2078	790	627	4084	2416	766	2162	11659	12301	1012	999	1023	37839	4346.81	ammecr1 domain-containing protein
COG2079	9002	4599	9299	6478	10179	17605	24093	28147	6415	10468	10907	137192	7586.38	MMGE PRPD family protein
COG2080	16483	7955	17501	20400	19494	27134	52733	54887	15734	18368	19019	269708	15168.2	(2Fe-2S)-binding domain protein
COG2081	26748	15233	13546	16789	46668	36779	15532	13196	38893	28856	43311	295551	12802.6	hi0933 family
COG2082	21588	8158	4013	4105	41833	38425	10906	10888	32926	24454	35840	233136	14335.3	Precorrin-8x methylmutase
COG2083	0	0	0	0	0	0	0	0	0	0	0	0	0	UPF0216 protein
COG2084	56820	29530	36782	39963	80423	83593	57379	58243	60881	62006	82158	647778	18289.3	Dehydrogenase
COG2085	5096	1875	1855	2941	6328	9571	4825	5339	4441	5570	5276	53117	2170.25	NADP oxidoreductase, coenzyme f420-dependent
COG2086	15752	10359	17407	17578	17633	23119	38430	39990	14178	17063	20492	232001	9528.12	Electron transfer flavoprotein
COG2087	21599	11534	11023	12261	41857	38330	17886	17132	32813	24310	35647	264392	11355.8	Adenosylcobinamide kinase
COG2088	310	407	316	262	237	159	940	862	322	323	238	4376	257.322	Could be involved in septation (By similarity)
COG2089	24159	10624	8144	5369	44212	43576	22410	24725	33305	27077	39258	282859	13670.4	synthase
COG2090	0	0	0	0	0	0	0	0	0	0	0	0	0	Domain of unknown function (DUF371)
COG2091	20532	11216	8613	7880	40123	34923	11667	11381	32419	23035	34991	236780	12198.1	4'-phosphopantetheinyl transferase
COG2092	0	6	8	14	2	4	26	9	2	2	2	75	7.57388	Promotes the exchange of GDP for GTP in EF-1-alpha GDP, thus allowing the regeneration of EF-1-alpha GTP that could then be used to form the ternary complex EF-1-alpha GTP AAtRNA (By similarity)
COG2093	0	6	8	14	2	4	26	9	2	2	2	75	7.57388	DNA-directed RNA polymerase, subunit e'
COG2094	20120	9115	8432	9005	40124	36164	10225	10312	30959	22292	33799	230547	12387.6	3-methyladenine DNA glycosylase
COG2095	9681	9482	10207	10461	10078	10968	17661	16106	9444	10796	12163	127047	2770.3	multiple antibiotic resistance (MarC)-related protein
COG2096	5611	4090	10561	11202	6369	9448	18784	17762	5340	6266	6579	102012	4984.05	cob(I)yrinic acid a,c-diamide adenosyltransferase activity
COG2097	0	6	8	14	2	4	26	9	2	2	2	75	7.57388	(ribosomal) protein
COG2098	0	6	8	14	2	4	26	9	2	2	2	75	7.57388	Catalyzes the conversion of 7,8-dihydroneopterin (H2Neo) to 6-hydroxymethyl-7,8-dihydropterin (6-HMD) (By similarity)
COG2099	18866	7128	789	2041	38454	31451	1891	2264	30684	21337	32792	187697	14688.3	precorrin-6x reductase
COG2100	0	0	0	0	0	0	0	0	0	0	0	0	0	Elp3
COG2101	0	6	8	14	2	4	26	9	2	2	2	75	7.57388	General factor that plays a role in the activation of archaeal genes transcribed by RNA polymerase. Binds specifically to the TATA box promoter element which lies close to the position of transcription initiation (By similarity)
COG2102	957	280	1373	759	899	586	4163	2945	898	999	1229	15088	1150.23	ATP- binding
COG2103	23385	9825	3541	2530	43131	36228	7054	7823	33929	25837	38401	231684	15361.1	Specifically catalyzes the cleavage of the D-lactyl ether substituent of MurNAc 6-phosphate, producing GlcNAc 6- phosphate and D-lactate
COG2104	25970	15115	14638	13943	46666	48427	28541	29167	34818	29143	41089	327517	12239.7	Thiamine biosynthesis protein thiS
COG2105	1018	1650	2497	2280	1133	2586	5671	6402	1552	1613	1827	28229	1794.83	aig2 family
COG2106	0	0	0	0	0	0	0	0	0	0	0	0	0	chromosome 9 open reading frame 114
COG2107	37	2	649	512	19	24	2330	2115	44	19	36	5787	868.728	periplasmic solute-binding protein
COG2108	1	6	8	14	2	4	26	9	3	2	2	77	7.42967	radical SAM domain protein
COG2109	56620	23016	9683	8618	115842	100416	25368	24594	90778	63457	98035	616427	39986.5	Cob-I-yrinic acid a,c-diamide adenosyltransferase
COG2110	6095	4114	11858	11959	6680	11090	21296	21260	6492	6952	7526	115322	5906.98	appr-1-p processing domain protein
COG2111	6487	3113	4194	4208	7058	5177	10161	11331	7656	6930	9953	76268	2687.45	Monovalent cation H antiporter subunit
COG2112	0	0	1	1	4	10	66	10	0	1	0	93	19.4647	serine threonine protein kinase
COG2113	21528	7541	9247	10431	24084	27983	25314	27523	16831	22684	28067	221233	7824.2	Glycine betaine
COG2114	12355	7476	19711	17412	14101	23874	46032	46683	13469	15142	15392	231647	13178.3	Guanylate Cyclase
COG2115	5174	1031	524	740	6413	4489	1499	1526	5158	5104	6560	38218	2396.14	Xylose isomerase
COG2116	3837	3316	2778	3921	3261	3440	6953	6130	3301	4056	4122	45115	1284.69	formate transmembrane transporter activity
COG2117	0	0	0	0	0	0	0	0	0	0	0	0	0	Subunit of tRNA(5-methylaminomethyl-2-thiouridylate) methyltransferase
COG2118	0	6	8	14	2	4	26	9	2	2	2	75	7.57388	DNA-binding protein
COG2119	40070	17953	9209	9635	79362	70686	12204	12151	62225	44522	68205	426222	27727.3	transmembrane protein 165
COG2120	16005	10471	20416	19561	19092	30375	43517	42371	13587	17508	17039	249942	11152.2	lmbE family
COG2121	6684	1694	3206	1951	7330	4377	9988	9657	7562	6630	9457	68536	3018.18	Domain of unknown function (DUF374)
COG2122	122	332	3505	2085	243	1369	10078	9937	304	309	322	28606	3806.59	apbe family lipoprotein
COG2123	0	6	8	14	2	4	26	9	2	2	2	75	7.57388	Exosome complex
COG2124	28661	12405	21759	24127	34037	57153	56517	52357	23839	30978	30785	372618	14982.5	Cytochrome p450
COG2125	0	6	8	14	2	4	26	9	2	2	2	75	7.57388	40s ribosomal protein s6
COG2126	0	6	8	14	2	4	26	9	2	2	2	75	7.57388	Binds to the 23S rRNA (By similarity)
COG2127	41945	19823	9993	11766	81672	70591	15967	14659	64531	46929	71125	449001	27589.4	protein catabolic process
COG2128	22199	9054	8223	11807	24973	24410	28088	25616	22418	22635	27117	226540	7288.08	Antioxidant protein with alkyl hydroperoxidase activity. Required for the reduction of the AhpC active site cysteine residues and for the regeneration of the AhpC enzyme activity (By similarity)
COG2129	1619	1059	5919	3484	1853	4311	16817	16203	2096	2135	2230	57726	5738.22	metallophosphoesterase
COG2130	2264	3252	6177	9920	2171	3644	8760	7548	2671	2126	2385	50918	2925.96	alcohol dehydrogenase
COG2131	1810	4189	6375	3856	1721	3085	15160	15273	2148	2053	2244	57914	5107.39	dCMP deaminase activity
COG2132	10187	7450	20373	23514	11148	17177	36482	33921	9652	11146	11119	192169	10059.8	Multicopper oxidase
COG2133	22643	13057	22887	25884	24958	32336	45505	41790	21096	24806	27403	302365	9287.58	Dehydrogenase
COG2134	2	1	1	2	1	1	12	11	0	1	0	32	4.30011	cdp-diacylglycerol pyrophosphatase
COG2135	32110	15111	16615	17582	53635	51086	23175	23674	41636	35290	50176	360090	14620.1	conserved protein
COG2136	0	0	0	0	0	0	0	0	0	0	0	0	0	u3 small nucleolar ribonucleoprotein
COG2137	14927	10075	15371	14068	16693	20827	30726	31661	12897	15910	19428	202583	6952.94	Modulates RecA activity (By similarity)
COG2138	21651	9510	2800	3078	41813	37744	7899	6865	32881	24406	35781	224428	14957.2	cobalamin (vitamin b12) biosynthesis cbix protein
COG2139	0	6	8	14	2	4	26	9	2	2	2	75	7.57388	(ribosomal) protein
COG2140	22	301	251	146	191	582	1109	644	173	152	110	3681	320.712	Oxalate decarboxylase
COG2141	63495	31366	67829	73039	76728	111464	112503	103195	47071	66001	66356	819047	25608.8	Monooxygenase
COG2142	9718	7199	11464	11706	10287	14922	20677	19635	7448	10818	12442	136316	4408.02	succinate dehydrogenase activity
COG2143	1715	682	1956	892	1436	1969	5394	5342	1554	1719	1927	24586	1604.07	thioredoxin, soxw
COG2144	1405	502	45	45	1059	2060	134	153	756	1227	1742	9128	719.276	AIR synthase related protein
COG2145	107	1646	4566	6313	110	93	312	569	143	124	106	14089	2141.65	4-methyl-5-beta-hydroxyethylthiazole kinase
COG2146	10991	9270	18419	23140	12904	19831	31209	28813	10364	12038	11692	188671	7735.55	nitrite reductase (nad(p)h) small subunit
COG2147	0	6	8	14	2	4	26	9	2	2	2	75	7.57388	ribosomal protein L19
COG2148	31835	18610	24444	22868	52887	56250	61576	55742	43703	36150	47997	452062	15107.7	sugar transferase
COG2149	3257	1234	1549	2568	3604	5737	3751	4711	3016	3506	3374	36307	1273.82	Membrane
COG2150	0	6	8	14	2	4	26	9	2	2	2	75	7.57388	amino acid-binding ACT domain protein
COG2151	18272	9732	15912	15879	20652	26251	34590	33558	15717	19361	22590	232514	7678.05	fes assembly suf system protein
COG2152	889	2048	3116	1767	964	2370	10411	9699	1006	916	1103	34289	3507.2	Glycosidase
COG2153	3652	7929	9999	12197	3663	4463	13562	14822	4488	4386	4783	83944	4284.45	#NAME?
COG2154	32246	13227	9208	8063	53400	50567	25740	25730	41376	35077	49868	344502	16545.9	4-alpha-hydroxytetrahydrobiopterin dehydratase activity
COG2155	29	1720	4453	5159	18	28	60	139	40	54	35	11735	1921.31	Conserved Protein
COG2156	244	1782	5705	6109	313	1574	5186	3955	382	240	219	25709	2416.17	One of the components of the high-affinity ATP-driven potassium transport (or KDP) system, which catalyzes the hydrolysis of ATP coupled with the exchange of hydrogen and potassium ions. The C subunit may be involved in assembly of the KDP complex (By similarity)
COG2157	0	6	8	14	2	4	26	9	2	2	2	75	7.57388	ribosomal protein
COG2158	8	23	47	27	13	93	220	188	34	18	15	686	74.1731	Cysteine-rich small domain protein
COG2159	11308	4201	15923	11329	13543	23019	55955	43881	9687	12121	12075	213042	15992.7	amidohydrolase 2
COG2160	106	788	253	519	136	85	347	896	382	117	101	3730	286.269	Catalyzes the conversion of L-arabinose to L-ribulose (By similarity)
COG2161	4369	5021	6632	8165	4799	8447	16179	17447	4146	4832	4919	84956	4733.76	prevent-host-death family
COG2162	3389	816	413	561	4054	3941	2715	1225	2549	3584	3509	26756	1415.98	N-acetyltransferase
COG2163	1	193	4	1	0	0	0	2	1	0	0	202	57.9332	(ribosomal) protein
COG2164	0	0	456	337	0	6	1661	1144	0	0	0	3604	566.427	Pfam:DUF369
COG2165	45321	24065	34061	34036	64550	57792	87319	79420	58828	49972	62069	597433	19373	General secretion pathway protein
COG2166	25839	11529	2400	5682	46063	35824	8271	7538	38124	28030	42614	251914	16294	Fe-S metabolism associated
[truncated: 2,794 more rows]
